# Supplementary material for: PCSK9 inhibitor effectively alleviated cognitive dysfunction in a type 2 diabetes mellitus rat model
Source: PeerJ. 2024 Aug 14;12:e17676. doi: 10.7717/peerj.17676 (PMC11330219; doi:10.7717/peerj.17676)
Supplement: Supplemental Information 1 — “Protein”, “Protein Name”, “Gene Name”, “ProteinGroup”, “FastaHeaders”, “Proteins”, “Peptides”, “RazorUniquePeptides”, “UniquePeptides”, “Coverage”, “MolWeight”, all are used to describe proteins. “t test p value” represents the protein differential expression between the Model group and Treat group, P < 0.05 significant. “Treat/Model” represents fold change of the protein differential expression between the Model group and Treat group. “red” means up-regulated protein expression, and “green” means down-regulated protein expression. Columns L to S respectively represent the relative expression of the differentially expressed peptides detected in three replicates of mass spectrometry in DACD rats and normal controls. [file peerj-12-17676-s001.xlsx]

## Sheet: supplementary material1
Protein	Protein Name	Gene Name	ProteinGroup	FastaHeaders	Proteins	Peptides	RazorUniquePeptides	UniquePeptides	Coverage	MolWeight	LFQ intensity Treat1	LFQ intensity Treat2	LFQ intensity Treat3	average Treat	LFQ intensity Model1	LFQ intensity Model2	LFQ intensity Model3	average Model	Treat/Model	t test p value
ENSRNOP00000021751	DEK proto-oncogene	Dek	ENSRNOP00000021751.4;ENSRNOP00000089065.1	ENSRNOP00000021751.4 pep primary_assembly:mRatBN7.2:17:17580843:17602808:1 gene:ENSRNOG00000016152.5 transcript:ENSRNOT00000021751.5 gene_biotype:protein_coding transcript_biotype:protein_coding gene_symbol:Dek description:DEK proto-oncogene [Source:RGD Sy	2	2	2	2	6.9	42.892	136230	181860		159045	3082.9	3913.5	6557.4	4517.93	35.203	0.00284174
ENSRNOP00000071662	eukaryotic translation init	Eif4ebp2	ENSRNOP00000071662.1;ENSRNOP00000084079.1	ENSRNOP00000071662.1 pep primary_assembly:mRatBN7.2:20:29382668:29399927:-1 gene:ENSRNOG00000055391.2 transcript:ENSRNOT00000082448.2 gene_biotype:protein_coding transcript_biotype:protein_coding gene_symbol:Eif4ebp2 description:eukaryotic translation init	2	1	1	1	25.8	12.886	79549	76436	58610	71531.7	17515	14498	36969	22994	3.11088	0.00719701
ENSRNOP00000020926	prostaglandin D2 synthase	Ptgds	ENSRNOP00000020926.4	ENSRNOP00000020926.4 pep primary_assembly:mRatBN7.2:3:8281899:8284833:-1 gene:ENSRNOG00000015550.6 transcript:ENSRNOT00000020926.6 gene_biotype:protein_coding transcript_biotype:protein_coding gene_symbol:Ptgds description:prostaglandin D2 synthase [Source	1	3	3	3	14.8	21.301	1458300	1558000	1350000	1.45543e+06	19703	543980	861850	475178	3.06292	0.0178704
ENSRNOP00000081174	dehydrogenase/reductase 1	Dhrs1	ENSRNOP00000081174.1;ENSRNOP00000027511.3;ENSRNOP00000097862.1;ENSRNOP00000082526.1	ENSRNOP00000081174.1 pep primary_assembly:mRatBN7.2:15:29236782:29243795:-1 gene:ENSRNOG00000020264.6 transcript:ENSRNOT00000101030.1 gene_biotype:protein_coding transcript_biotype:protein_coding gene_symbol:Dhrs1 description:dehydrogenase/reductase 1 [Sou	4	3	3	3	16.7	32.497	63766	77989	72507	71420.7	26235	34121		30178	2.36665	0.00661439
ENSRNOP00000066155	aminomethyltransferase	Amt	ENSRNOP00000066155.3;ENSRNOP00000083744.1	ENSRNOP00000066155.3 pep primary_assembly:mRatBN7.2:8:108981872:108988126:1 gene:ENSRNOG00000050214.3 transcript:ENSRNOT00000073559.3 gene_biotype:protein_coding transcript_biotype:protein_coding gene_symbol:Amt description:aminomethyltransferase [Source:R	2	4	4	4	19	44.268	152110	115600	132330	133347	80570	53017	55348	62978.3	2.11734	0.00690345
ENSRNOP00000003567	prostaglandin-endoperoxide synt	Ptgs2	ENSRNOP00000003567.2	ENSRNOP00000003567.2 pep primary_assembly:mRatBN7.2:13:62163932:62172188:1 gene:ENSRNOG00000002525.5 transcript:ENSRNOT00000003567.5 gene_biotype:protein_coding transcript_biotype:protein_coding gene_symbol:Ptgs2 description:prostaglandin-endoperoxide synt	1	1	1	1	2.3	69.163	76422	58266		67344	36983	29750	30882	32538.3	2.06968	0.0179294
ENSRNOP00000070634	tudor domain containing 7	Tdrd7	ENSRNOP00000070634.2;ENSRNOP00000068568.1;ENSRNOP00000070639.2	ENSRNOP00000070634.2 pep primary_assembly:mRatBN7.2:5:60245699:60312544:1 gene:ENSRNOG00000055779.2 transcript:ENSRNOT00000089938.2 gene_biotype:protein_coding transcript_biotype:protein_coding gene_symbol:Tdrd7 description:tudor domain containing 7 [Sourc	3	6	6	6	8.6	121.37	129510	131580	151720	137603	47490	98160	87016	77555.3	1.77426	0.0238506
ENSRNOP00000094568	dishevelled associated activator	Daam2	ENSRNOP00000094568.1;ENSRNOP00000087375.1;ENSRNOP00000074902.2	ENSRNOP00000094568.1 pep primary_assembly:mRatBN7.2:9:11428724:11545497:1 gene:ENSRNOG00000053945.2 transcript:ENSRNOT00000103217.1 gene_biotype:protein_coding transcript_biotype:protein_coding gene_symbol:Daam2 description:dishevelled associated activator	3	13	11	11	15.5	122.24	572500	718030	612020	634183	317860	329030	450750	365880	1.73331	0.0115865
ENSRNOP00000093750	sorting nexin 9	Snx9	ENSRNOP00000093750.1;ENSRNOP00000089654.1;ENSRNOP00000095135.1;ENSRNOP00000066186.3;ENSRNOP00000087544.1;ENSRNOP00000091916.1	ENSRNOP00000093750.1 pep primary_assembly:mRatBN7.2:1:46424968:46506506:1 gene:ENSRNOG00000046874.3 transcript:ENSRNOT00000096582.1 gene_biotype:protein_coding transcript_biotype:protein_coding gene_symbol:Snx9 description:sorting nexin 9 [Source:RGD Symbo	6	4	4	4	12.3	65.723	77803	96456	80053	84770.7	60194	60495	26542	49077	1.7273	0.0483908
ENSRNOP00000065206	apolipoprotein A1	Apoa1	ENSRNOP00000065206.1;ENSRNOP00000068933.2	ENSRNOP00000065206.1 pep primary_assembly:mRatBN7.2:8:46527144:46529035:1 gene:ENSRNOG00000045679.3 transcript:ENSRNOT00000074357.3 gene_biotype:protein_coding transcript_biotype:protein_coding gene_symbol:Apoa1 description:apolipoprotein A1 [Source:RGD Sy	2	11	11	11	56.4	30.062	1661400	1394300	1502900	1.51953e+06	1066000	1082600	569680	906093	1.67702	0.0296329
ENSRNOP00000039048	mitochondrially encoded cytochrome c o	Mt-co1	ENSRNOP00000039048.3	ENSRNOP00000039048.3 pep primary_assembly:mRatBN7.2:MT:5323:6867:1 gene:ENSRNOG00000034234.3 transcript:ENSRNOT00000050156.3 gene_biotype:protein_coding transcript_biotype:protein_coding gene_symbol:Mt-co1 description:mitochondrially encoded cytochrome c o	1	2	2	2	7.8	56.844	2816500	3955800	4418000	3730100	2569600	1944300	2184700	2.23287e+06	1.67054	0.0424569
ENSRNOP00000076199	galectin 9	Lgals9	ENSRNOP00000076199.2;ENSRNOP00000017071.4;ENSRNOP00000076090.2;ENSRNOP00000017042.5;ENSRNOP00000079075.1;ENSRNOP00000076231.1	ENSRNOP00000076199.2 pep primary_assembly:mRatBN7.2:10:63907024:63930045:-1 gene:ENSRNOG00000012681.10 transcript:ENSRNOT00000093232.2 gene_biotype:protein_coding transcript_biotype:protein_coding gene_symbol:Lgals9 description:galectin 9 [Source:RGD Symbo	6	4	4	2	16.5	35.078	243350	202400	164740	203497	109030	135140	122590	122253	1.66455	0.0273616
ENSRNOP00000085049	sulfide quinone oxidoreductase	Sqor	ENSRNOP00000085049.1;ENSRNOP00000089443.1;ENSRNOP00000061547.2;ENSRNOP00000082267.1;ENSRNOP00000074060.1	ENSRNOP00000085049.1 pep primary_assembly:mRatBN7.2:3:109841250:109887228:1 gene:ENSRNOG00000000172.8 transcript:ENSRNOT00000094867.1 gene_biotype:protein_coding transcript_biotype:protein_coding gene_symbol:Sqor description:sulfide quinone oxidoreductase	5	5	5	5	16.6	48.532	310130	219270	324280	284560	155700	209330	173530	179520	1.58512	0.0450528
ENSRNOP00000069996	protein phosphatase 1, regul	Ppp1r8	ENSRNOP00000069996.1	ENSRNOP00000069996.1 pep primary_assembly:mRatBN7.2:5:145031498:145048752:-1 gene:ENSRNOG00000059550.2 transcript:ENSRNOT00000089155.2 gene_biotype:protein_coding transcript_biotype:protein_coding gene_symbol:Ppp1r8 description:protein phosphatase 1, regul	1	2	2	2	10.8	38.539	72492	50890	67079	63487	43584	41980	34759	40107.7	1.58291	0.0292775
ENSRNOP00000096588	syntrophin, beta 1	Sntb1	ENSRNOP00000096588.1;ENSRNOP00000006423.4	ENSRNOP00000096588.1 pep primary_assembly:mRatBN7.2:7:87063860:87329315:-1 gene:ENSRNOG00000004821.7 transcript:ENSRNOT00000100092.1 gene_biotype:protein_coding transcript_biotype:protein_coding gene_symbol:Sntb1 description:syntrophin, beta 1 [Source:RGD	2	13	13	12	37.5	55.503	433810	604750	628010	555523	301130	401720	350530	351127	1.58212	0.0393052
ENSRNOP00000064261	PDZ and LIM domain 4	Pdlim4	ENSRNOP00000064261.1;ENSRNOP00000086241.1	ENSRNOP00000064261.1 pep primary_assembly:mRatBN7.2:10:38198689:38212938:-1 gene:ENSRNOG00000050794.2 transcript:ENSRNOT00000074616.2 gene_biotype:protein_coding transcript_biotype:protein_coding gene_symbol:Pdlim4 description:PDZ and LIM domain 4 [Source:	2	6	6	6	27	35.564	248930	176150	212080	212387	151010	127060	135450	137840	1.54082	0.0281635
ENSRNOP00000024793	DEAD-box helicase 19A	Ddx19a	ENSRNOP00000024793.8;ENSRNOP00000070488.2;ENSRNOP00000074386.2	ENSRNOP00000024793.8 pep primary_assembly:mRatBN7.2:19:38942502:38962854:-1 gene:ENSRNOG00000018033.8 transcript:ENSRNOT00000024793.8 gene_biotype:protein_coding transcript_biotype:protein_coding gene_symbol:Ddx19a description:DEAD-box helicase 19A [Source	3	9	9	1	27.8	53.406	1245200	1203200	1375800	1.27473e+06	863190	1038600	597790	833193	1.52994	0.0331106
ENSRNOP00000060140	acetyl-CoA acyltransferase 2	Acaa2	ENSRNOP00000060140.3;ENSRNOP00000073665.2	ENSRNOP00000060140.3 pep primary_assembly:mRatBN7.2:18:68345012:68373249:1 gene:ENSRNOG00000013766.8 transcript:ENSRNOT00000067018.4 gene_biotype:protein_coding transcript_biotype:protein_coding gene_symbol:Acaa2 description:acetyl-CoA acyltransferase 2 [S	2	13	13	13	57.9	41.885	2364200	2380500	2207300	2.31733e+06	1971100	1542600	1065600	1.52643e+06	1.51814	0.0415956
ENSRNOP00000086268	2,4-dienoyl-CoA reductase 1	Decr1	ENSRNOP00000086268.1;ENSRNOP00000011330.3;ENSRNOP00000093824.1	ENSRNOP00000086268.1 pep primary_assembly:mRatBN7.2:5:29411172:29439011:-1 gene:ENSRNOG00000008236.7 transcript:ENSRNOT00000097769.1 gene_biotype:protein_coding transcript_biotype:protein_coding gene_symbol:Decr1 description:2,4-dienoyl-CoA reductase 1 [So	3	5	5	5	22.8	32.983	654270	555610	568300	592727	428970	372730	393700	398467	1.48752	0.00519067
ENSRNOP00000077983	dynein light chain Tctex-type	Dynlt1	ENSRNOP00000077983.1;ENSRNOP00000024656.4	ENSRNOP00000077983.1 pep primary_assembly:mRatBN7.2:1:46887017:46893551:-1 gene:ENSRNOG00000018207.5 transcript:ENSRNOT00000107400.1 gene_biotype:protein_coding transcript_biotype:protein_coding gene_symbol:Dynlt1 description:dynein light chain Tctex-type	2	2	2	2	23	16.236	72516	76317	58234	69022.3	46314	49517	43708	46513	1.48394	0.0173778
ENSRNOP00000069185	phosphatidylinositol binding	Picalm	ENSRNOP00000069185.3	ENSRNOP00000069185.3 pep primary_assembly:mRatBN7.2:1:144103449:144137534:1 gene:ENSRNOG00000018322.9 transcript:ENSRNOT00000091470.3 gene_biotype:protein_coding transcript_biotype:protein_coding gene_symbol:Picalm description:phosphatidylinositol binding	1	1	1	1	19.8	8.5197	30983	33156	36210	33449.7	22749		22886	22817.5	1.46597	0.0122551
ENSRNOP00000080513	G protein subunit alpha o1	Gnao1	ENSRNOP00000080513.1	ENSRNOP00000080513.1 pep primary_assembly:mRatBN7.2:19:11043326:11192493:-1 gene:ENSRNOG00000019482.8 transcript:ENSRNOT00000116733.1 gene_biotype:protein_coding transcript_biotype:protein_coding gene_symbol:Gnao1 description:G protein subunit alpha o1 [So	1	21	4	3	74.6	40.02	5104600	5403600	5843300	5450500	4304300	3641800	3525900	3824000	1.42534	0.00736493
ENSRNOP00000082888	fetuin B	Fetub	ENSRNOP00000082888.1;ENSRNOP00000051504.3;ENSRNOP00000097728.1	ENSRNOP00000082888.1 pep primary_assembly:mRatBN7.2:11:78082156:78090810:-1 gene:ENSRNOG00000001806.8 transcript:ENSRNOT00000100999.1 gene_biotype:protein_coding transcript_biotype:protein_coding gene_symbol:Fetub description:fetuin B [Source:RGD Symbol;Ac	3	4	4	4	17.3	42.545	224010	288310	282570	264963	200350	179180	200070	193200	1.37145	0.0297649
ENSRNOP00000053014	potassium inwardly-rectifying	Kcnj4	ENSRNOP00000053014.1	ENSRNOP00000053014.1 pep primary_assembly:mRatBN7.2:7:111047094:111074151:-1 gene:ENSRNOG00000013869.7 transcript:ENSRNOT00000018564.7 gene_biotype:protein_coding transcript_biotype:protein_coding gene_symbol:Kcnj4 description:potassium inwardly-rectifying	1	2	2	2	6.1	49.664	61683	74471	70863	69005.7	41893	56648	52457	50332.7	1.37099	0.032474
ENSRNOP00000070499	serpin family A member 1 [	Serpina1	ENSRNOP00000070499.1;ENSRNOP00000012577.4;ENSRNOP00000070937.2	ENSRNOP00000070499.1 pep primary_assembly:mRatBN7.2:6:122866316:122888339:-1 gene:ENSRNOG00000032669.6 transcript:ENSRNOT00000084157.2 gene_biotype:protein_coding transcript_biotype:protein_coding gene_symbol:Serpina1 description:serpin family A member 1 [	3	7	7	7	26.8	46.121	1797300	1727200	1700200	1.74157e+06	1245000	1350400	1218300	1.27123e+06	1.36998	0.000691952
ENSRNOP00000024390	GRB2-associated binding protein	Gab1	ENSRNOP00000024390.4;ENSRNOP00000071006.2	ENSRNOP00000024390.4 pep primary_assembly:mRatBN7.2:19:27131262:27239236:1 gene:ENSRNOG00000017879.6 transcript:ENSRNOT00000024390.6 gene_biotype:protein_coding transcript_biotype:protein_coding gene_symbol:Gab1 description:GRB2-associated binding protein	2	3	3	3	9.4	80.089	84284	81014	82730	82676	66580	54154		60367	1.36956	0.0186619
ENSRNOP00000072053	MOB kinase activator 1A	Mob1a	ENSRNOP00000072053.2;ENSRNOP00000076842.1;ENSRNOP00000014650.6;ENSRNOP00000077350.1;ENSRNOP00000095506.1;ENSRNOP00000089189.1;ENSRNOP00000088852.1	ENSRNOP00000072053.2 pep primary_assembly:mRatBN7.2:4:115831551:115848556:1 gene:ENSRNOG00000059474.2 transcript:ENSRNOT00000090987.2 gene_biotype:protein_coding transcript_biotype:protein_coding gene_symbol:Mob1a description:MOB kinase activator 1A [Sourc	7	4	4	4	22.8	24.992	392160	350960	392960	378693	331870	240530	268520	280307	1.351	0.031685
ENSRNOP00000081503			ENSRNOP00000081503.1;ENSRNOP00000040750.3;ENSRNOP00000095830.1;ENSRNOP00000079407.1	ENSRNOP00000081503.1 pep primary_assembly:mRatBN7.2:12:15974864:15975648:1 gene:ENSRNOG00000068025.1 transcript:ENSRNOT00000119771.1 gene_biotype:protein_coding transcript_biotype:protein_coding;ENSRNOP00000040750.3 pep primary_assembly:mRatBN7.2:1:2041632	4	2	2	2	31	15.722	82475	83544	79237	81752		67284	54148	60716	1.34647	0.0268234
ENSRNOP00000071741	RAB13, member RAS oncogene fam	Rab13	ENSRNOP00000071741.2;ENSRNOP00000022626.3;ENSRNOP00000090651.1	ENSRNOP00000071741.2 pep primary_assembly:mRatBN7.2:2:175675318:175680029:1 gene:ENSRNOG00000016733.5 transcript:ENSRNOT00000092112.2 gene_biotype:protein_coding transcript_biotype:protein_coding gene_symbol:Rab13 description:RAB13, member RAS oncogene fam	3	4	2	2	26.8	20.9	268970	252000	230550	250507	197640	178080	186280	187333	1.33722	0.00716864
ENSRNOP00000012612	opioid growth factor receptor [	Ogfr	ENSRNOP00000012612.3;ENSRNOP00000094532.1;ENSRNOP00000073386.2	ENSRNOP00000012612.3 pep primary_assembly:mRatBN7.2:3:167703163:167709457:1 gene:ENSRNOG00000009355.7 transcript:ENSRNOT00000012611.6 gene_biotype:protein_coding transcript_biotype:protein_coding gene_symbol:Ogfr description:opioid growth factor receptor [	3	4	4	4	13.5	61.455	134860	167610	139440	147303	118080	99092	116420	111197	1.3247	0.0386618
ENSRNOP00000019405	actin related protein 2/3 compl	Arpc5l	ENSRNOP00000019405.7;ENSRNOP00000083929.1;ENSRNOP00000089031.1	ENSRNOP00000019405.7 pep primary_assembly:mRatBN7.2:3:22759900:22767538:1 gene:ENSRNOG00000014317.8 transcript:ENSRNOT00000019405.8 gene_biotype:protein_coding transcript_biotype:protein_coding gene_symbol:Arpc5l description:actin related protein 2/3 compl	3	7	7	7	60.8	17.139	3114400	2678900	3085000	2.95943e+06	2192700	2565600	1979200	2.24583e+06	1.31774	0.0322753
ENSRNOP00000022113	transthyretin	Ttr	ENSRNOP00000022113.3	ENSRNOP00000022113.3 pep primary_assembly:mRatBN7.2:18:11943789:11951008:1 gene:ENSRNOG00000016275.5 transcript:ENSRNOT00000022113.5 gene_biotype:protein_coding transcript_biotype:protein_coding gene_symbol:Ttr description:transthyretin [Source:RGD Symbol;	1	4	4	4	38.4	16.06	710840	679520	656290	682217	493470	557500	502710	517893	1.31729	0.00297421
ENSRNOP00000037011	bone morphogenetic protein recep	Bmpr2	ENSRNOP00000037011.5;ENSRNOP00000095162.1	ENSRNOP00000037011.5 pep primary_assembly:mRatBN7.2:9:61192718:61301809:1 gene:ENSRNOG00000022196.5 transcript:ENSRNOT00000035238.5 gene_biotype:protein_coding transcript_biotype:protein_coding gene_symbol:Bmpr2 description:bone morphogenetic protein recep	2	2	2	2	4.1	114.8	98437	97913	109140	101830	83568	83542	65097	77402.3	1.31559	0.0269622
ENSRNOP00000018600	purinergic receptor P2Y12	P2ry12	ENSRNOP00000018600.2;ENSRNOP00000086953.1;ENSRNOP00000089320.1	ENSRNOP00000018600.2 pep primary_assembly:mRatBN7.2:2:143481430:143523361:-1 gene:ENSRNOG00000013902.5 transcript:ENSRNOT00000018600.5 gene_biotype:protein_coding transcript_biotype:protein_coding gene_symbol:P2ry12 description:purinergic receptor P2Y12 [S	3	2	2	2	7	39.047	185110	178970	177650	180577	134680	160440	126570	140563	1.28466	0.0187265
ENSRNOP00000009708	zinc finger DHHC-type palmitoy	Zdhhc5	ENSRNOP00000009708.4	ENSRNOP00000009708.4 pep primary_assembly:mRatBN7.2:3:69771890:69799921:-1 gene:ENSRNOG00000006832.7 transcript:ENSRNOT00000009708.6 gene_biotype:protein_coding transcript_biotype:protein_coding gene_symbol:Zdhhc5 description:zinc finger DHHC-type palmitoy	1	6	6	6	16.4	77.429	332110	326290	273080	310493	245050	259110	224860	243007	1.27772	0.0336687
ENSRNOP00000097987	ribosomal protein S6	Rps6	ENSRNOP00000097987.1;ENSRNOP00000010383.6;ENSRNOP00000067572.2;ENSRNOP00000092962.1;ENSRNOP00000089089.1;ENSRNOP00000074200.1	ENSRNOP00000097987.1 pep primary_assembly:mRatBN7.2:5:101371136:101374533:-1 gene:ENSRNOG00000007663.8 transcript:ENSRNOT00000107590.1 gene_biotype:protein_coding transcript_biotype:protein_coding gene_symbol:Rps6 description:ribosomal protein S6 [Source:R	6	5	5	5	22.7	28.421	891000	905800	848250	881683	731470	675070	691050	699197	1.26099	0.00162322
ENSRNOP00000074506	phosphoribosyl transferase d	Prtfdc1	ENSRNOP00000074506.2;ENSRNOP00000037534.5;ENSRNOP00000093770.1;ENSRNOP00000092027.1	ENSRNOP00000074506.2 pep primary_assembly:mRatBN7.2:17:83549613:83654500:-1 gene:ENSRNOG00000024874.6 transcript:ENSRNOT00000080193.2 gene_biotype:protein_coding transcript_biotype:protein_coding gene_symbol:Prtfdc1 description:phosphoribosyl transferase d	4	5	5	5	26	29.087	531330	543980	474670	516660	371770	472360	388920	411017	1.25703	0.0486086
ENSRNOP00000095951	sterile alpha motif domain conta	Samd8	ENSRNOP00000095951.1	ENSRNOP00000095951.1 pep primary_assembly:mRatBN7.2:15:2515385:2557693:-1 gene:ENSRNOG00000064565.1 transcript:ENSRNOT00000110077.1 gene_biotype:protein_coding transcript_biotype:protein_coding gene_symbol:Samd8 description:sterile alpha motif domain conta	1	2	2	2	6.7	50.128	52907		54611	53759	41018	41869	47601	43496	1.23595	0.0333158
ENSRNOP00000093399	H1.0 linker histone	H1f0	ENSRNOP00000093399.1	ENSRNOP00000093399.1 pep primary_assembly:mRatBN7.2:7:110592208:110594694:1 gene:ENSRNOG00000063732.1 transcript:ENSRNOT00000112015.1 gene_biotype:protein_coding transcript_biotype:protein_coding gene_symbol:H1f0 description:H1.0 linker histone [Source:RGD	1	5	5	5	27.3	20.885	2369800	2099300	2142500	2.20387e+06	1779900	1663500	1912800	1785400	1.23438	0.0193584
ENSRNOP00000070189	spectrin, beta, non-erythrocy	Sptbn2	ENSRNOP00000070189.2	ENSRNOP00000070189.2 pep primary_assembly:mRatBN7.2:1:202002970:202044283:1 gene:ENSRNOG00000058842.2 transcript:ENSRNOT00000088288.2 gene_biotype:protein_coding transcript_biotype:protein_coding gene_symbol:Sptbn2 description:spectrin, beta, non-erythrocy	1	125	2	2	65.3	248.3	958010	1018600	896980	957863	817710	756520	754420	776217	1.23402	0.0112141
ENSRNOP00000079265	structural maintenance of chrom	Smc4	ENSRNOP00000079265.1;ENSRNOP00000013931.6;ENSRNOP00000093203.1	ENSRNOP00000079265.1 pep primary_assembly:mRatBN7.2:2:153240491:153268722:1 gene:ENSRNOG00000010274.6 transcript:ENSRNOT00000118419.1 gene_biotype:protein_coding transcript_biotype:protein_coding gene_symbol:Smc4 description:structural maintenance of chrom	3	1	1	1	0.7	135.98	587280	677150	628270	630900	747370	765120	759030	757173	0.833231	0.00886458
ENSRNOP00000000025	heme binding protein 1	Hebp1	ENSRNOP00000000025.7	ENSRNOP00000000025.7 pep primary_assembly:mRatBN7.2:4:167974319:168003854:-1 gene:ENSRNOG00000000024.8 transcript:ENSRNOT00000000025.8 gene_biotype:protein_coding transcript_biotype:protein_coding gene_symbol:Hebp1 description:heme binding protein 1 [Sourc	1	7	7	7	74.7	21.124	4239800	4364600	4845200	4483200	5380400	5400900	5447800	5409700	0.828734	0.00753708
ENSRNOP00000075660	glutamine fructose-6-phosphate	Gfpt1	ENSRNOP00000075660.1;ENSRNOP00000025070.6;ENSRNOP00000096242.1	ENSRNOP00000075660.1 pep primary_assembly:mRatBN7.2:4:119496714:119546471:1 gene:ENSRNOG00000018507.8 transcript:ENSRNOT00000090827.2 gene_biotype:protein_coding transcript_biotype:protein_coding gene_symbol:Gfpt1 description:glutamine fructose-6-phosphate	3	6	6	6	13.2	78.918	121000	131210	126780	126330	147550	165100	145470	152707	0.827272	0.0186619
ENSRNOP00000094050	ELKS/RAB6-interacting/CAST fam	Erc1	ENSRNOP00000094050.1	ENSRNOP00000094050.1 pep primary_assembly:mRatBN7.2:4:152767419:153055533:-1 gene:ENSRNOG00000009264.7 transcript:ENSRNOT00000109038.1 gene_biotype:protein_coding transcript_biotype:protein_coding gene_symbol:Erc1 description:ELKS/RAB6-interacting/CAST fam	1	27	19	1	28.6	128.32	1199900	1429200	1384300	1337800	1659700	1683900	1512600	1.61873e+06	0.826449	0.0334199
ENSRNOP00000007711	endoplasmic reticulum protein 4	Erp44	ENSRNOP00000007711.3	ENSRNOP00000007711.3 pep primary_assembly:mRatBN7.2:5:62516551:62610761:-1 gene:ENSRNOG00000005841.7 transcript:ENSRNOT00000007711.6 gene_biotype:protein_coding transcript_biotype:protein_coding gene_symbol:Erp44 description:endoplasmic reticulum protein 4	1	10	10	10	38.4	46.878	947320	1091000	1008800	1.01571e+06	1292000	1236200	1177800	1.23533e+06	0.822213	0.0144191
ENSRNOP00000084651	stum, mechanosensory transducti	Stum	ENSRNOP00000084651.1;ENSRNOP00000096992.1	ENSRNOP00000084651.1 pep primary_assembly:mRatBN7.2:13:92173544:92227213:-1 gene:ENSRNOG00000071066.1 transcript:ENSRNOT00000102467.1 gene_biotype:protein_coding transcript_biotype:protein_coding gene_symbol:Stum description:stum, mechanosensory transducti	2	3	3	3	26.1	14.789	2887000	3040000	3321700	3082900	3960300	3815100	3516600	3764000	0.819049	0.0202206
ENSRNOP00000092603	serpin family B member 9	Serpinb9	ENSRNOP00000092603.1;ENSRNOP00000083868.1;ENSRNOP00000022194.6;ENSRNOP00000090783.1;ENSRNOP00000064132.3	ENSRNOP00000092603.1 pep primary_assembly:mRatBN7.2:17:31420125:31431609:-1 gene:ENSRNOG00000033772.6 transcript:ENSRNOT00000115382.1 gene_biotype:protein_coding transcript_biotype:protein_coding gene_symbol:Serpinb9 description:serpin family B member 9 [S	5	7	7	7	28.3	42.301	503600	481470	508190	497753	679840	560180	585570	608530	0.81796	0.0412253
ENSRNOP00000093734	kinase non-catalytic C-lobe do	Kndc1	ENSRNOP00000093734.1;ENSRNOP00000030254.7	ENSRNOP00000093734.1 pep primary_assembly:mRatBN7.2:1:194690135:194738362:1 gene:ENSRNOG00000027240.7 transcript:ENSRNOT00000095514.1 gene_biotype:protein_coding transcript_biotype:protein_coding gene_symbol:Kndc1 description:kinase non-catalytic C-lobe do	2	7	7	7	6.9	190.41	241980	264660	273990	260210	306230	342610	308530	319123	0.81539	0.0176041
ENSRNOP00000094361	oligosaccharyltransferase comp	Ostc	ENSRNOP00000094361.1;ENSRNOP00000086520.1;ENSRNOP00000037521.4;ENSRNOP00000094880.1	ENSRNOP00000094361.1 pep primary_assembly:mRatBN7.2:2:219256847:219266107:-1 gene:ENSRNOG00000023322.6 transcript:ENSRNOT00000110030.1 gene_biotype:protein_coding transcript_biotype:protein_coding gene_symbol:Ostc description:oligosaccharyltransferase comp	4	1	1	1	8.3	16.293	160950	177260	169170	169127	216070	211380	196810	208087	0.81277	0.00644539
ENSRNOP00000073276	SPG7 matrix AAA peptidase subuni	Spg7	ENSRNOP00000073276.2;ENSRNOP00000048848.2	ENSRNOP00000073276.2 pep primary_assembly:mRatBN7.2:19:51117090:51150484:1 gene:ENSRNOG00000015150.7 transcript:ENSRNOT00000091712.2 gene_biotype:protein_coding transcript_biotype:protein_coding gene_symbol:Spg7 description:SPG7 matrix AAA peptidase subuni	2	11	11	11	21.8	85.975	368520	396250	439270	401347	482920	505120	495790	494610	0.811441	0.0124005
ENSRNOP00000060014			ENSRNOP00000060014.3	ENSRNOP00000060014.3 pep primary_assembly:mRatBN7.2:X:134420756:134485375:1 gene:ENSRNOG00000000879.8 transcript:ENSRNOT00000066809.4 gene_biotype:protein_coding transcript_biotype:protein_coding	1	5	5	5	8	79.893	532460	505990	515980	518143	649640	620520	648380	639513	0.810215	0.000581138
ENSRNOP00000001609	glutamine amidotransferase lik	Gatd3a	ENSRNOP00000001609.4	ENSRNOP00000001609.4 pep primary_assembly:mRatBN7.2:20:10514744:10522885:1 gene:ENSRNOG00000001211.5 transcript:ENSRNOT00000001609.5 gene_biotype:protein_coding transcript_biotype:protein_coding gene_symbol:Gatd3a description:glutamine amidotransferase lik	1	9	9	9	54.7	26.204	5227600	5688600	5967700	5.62797e+06	7558600	7022700	6279400	6.95357e+06	0.809364	0.0365994
ENSRNOP00000054889	piggyBac transposable element	Pgbd5	ENSRNOP00000054889.3	ENSRNOP00000054889.3 pep primary_assembly:mRatBN7.2:19:52336751:52402397:-1 gene:ENSRNOG00000026791.5 transcript:ENSRNOT00000058080.3 gene_biotype:protein_coding transcript_biotype:protein_coding gene_symbol:Pgbd5 description:piggyBac transposable element	1	8	8	8	23.5	58.337	320760	407590	398530	375627	472880	453270	477310	467820	0.80293	0.0319332
ENSRNOP00000087092	DExH-box helicase 57	Dhx57	ENSRNOP00000087092.1;ENSRNOP00000071053.2	ENSRNOP00000087092.1 pep primary_assembly:mRatBN7.2:6:14725303:14776321:1 gene:ENSRNOG00000054272.2 transcript:ENSRNOT00000107942.1 gene_biotype:protein_coding transcript_biotype:protein_coding gene_symbol:Dhx57 description:DExH-box helicase 57 [Source:RGD	2	4	4	4	5.1	149.88	61335	66539	70277	66050.3	85416	79236		82326	0.802302	0.0279053
ENSRNOP00000091379			ENSRNOP00000091379.1	ENSRNOP00000091379.1 pep primary_assembly:mRatBN7.2:5:63868485:63874184:-1 gene:ENSRNOG00000068816.1 transcript:ENSRNOT00000097036.1 gene_biotype:protein_coding transcript_biotype:protein_coding	1	2	2	2	16.5	21.481	73890	92260	84436	83528.7	112570	100560	99246	104125	0.802194	0.0388955
ENSRNOP00000090969	palmdelphin	Palmd	ENSRNOP00000090969.1;ENSRNOP00000090695.1;ENSRNOP00000089368.1;ENSRNOP00000070894.2	ENSRNOP00000090969.1 pep primary_assembly:mRatBN7.2:2:204894226:204925570:-1 gene:ENSRNOG00000058609.2 transcript:ENSRNOT00000118367.1 gene_biotype:protein_coding transcript_biotype:protein_coding gene_symbol:Palmd description:palmdelphin [Source:RGD Symbo	4	9	9	9	23.2	61.305	594520	571220	610850	592197	700840	838430	685910	741727	0.798403	0.0400449
ENSRNOP00000026153	synaptotagmin 12	Syt12	ENSRNOP00000026153.3	ENSRNOP00000026153.3 pep primary_assembly:mRatBN7.2:1:201730371:201759609:-1 gene:ENSRNOG00000019306.7 transcript:ENSRNOT00000026152.7 gene_biotype:protein_coding transcript_biotype:protein_coding gene_symbol:Syt12 description:synaptotagmin 12 [Source:RGD	1	9	9	9	31.1	46.607	1119300	1231800	1268400	1206500	1498500	1598800	1440300	1.51253e+06	0.797668	0.0089874
ENSRNOP00000085385	uridine monophosphate synthetase	Umps	ENSRNOP00000085385.1;ENSRNOP00000002450.6	ENSRNOP00000085385.1 pep primary_assembly:mRatBN7.2:11:66806096:66818056:1 gene:ENSRNOG00000001797.7 transcript:ENSRNOT00000117390.1 gene_biotype:protein_coding transcript_biotype:protein_coding gene_symbol:Umps description:uridine monophosphate synthetase	2	13	13	13	36.8	52.378	452190	499740	550590	500840	612450	662840	608430	627907	0.797634	0.0189774
ENSRNOP00000097464	ankyrin repeat and SOCS box-cont	Asb6	ENSRNOP00000097464.1;ENSRNOP00000031019.3	ENSRNOP00000097464.1 pep primary_assembly:mRatBN7.2:3:14110628:14114662:-1 gene:ENSRNOG00000024786.4 transcript:ENSRNOT00000105180.1 gene_biotype:protein_coding transcript_biotype:protein_coding gene_symbol:Asb6 description:ankyrin repeat and SOCS box-cont	2	2	2	2	6.7	47.599	50012	49315	47087	48804.7	62517	67277	53876	61223.3	0.797158	0.0366076
ENSRNOP00000054591	tetratricopeptide repeat domain	Ttc19	ENSRNOP00000054591.2;ENSRNOP00000083047.1;ENSRNOP00000091692.1	ENSRNOP00000054591.2 pep primary_assembly:mRatBN7.2:10:46969727:46997789:1 gene:ENSRNOG00000002977.7 transcript:ENSRNOT00000057777.3 gene_biotype:protein_coding transcript_biotype:protein_coding gene_symbol:Ttc19 description:tetratricopeptide repeat domain	3	3	3	3	11.4	39.874	177530	171760	182720	177337	242560	198010	227360	222643	0.796506	0.0280991
ENSRNOP00000094091	tropomyosin 3	Tpm3	ENSRNOP00000094091.1;ENSRNOP00000035561.5	ENSRNOP00000094091.1 pep primary_assembly:mRatBN7.2:2:175517226:175545013:1 gene:ENSRNOG00000017441.9 transcript:ENSRNOT00000101614.1 gene_biotype:protein_coding transcript_biotype:protein_coding gene_symbol:Tpm3 description:tropomyosin 3 [Source:RGD Symbo	2	21	1	1	49.1	32.994	65181	81299	77187	74555.7	94591	88863	99743	94399	0.789793	0.026268
ENSRNOP00000015779	eukaryotic translation initia	Eif5a2	ENSRNOP00000015779.5	ENSRNOP00000015779.5 pep primary_assembly:mRatBN7.2:2:111729323:111746087:1 gene:ENSRNOG00000011859.8 transcript:ENSRNOT00000015779.8 gene_biotype:protein_coding transcript_biotype:protein_coding gene_symbol:Eif5a2 description:eukaryotic translation initia	1	11	3	3	74.5	16.793	252260	305290	272900	276817	361990	357880	339230	353033	0.784109	0.010846
ENSRNOP00000047954	mitochondrially encoded cytochrome b	Mt-cyb	ENSRNOP00000047954.3	ENSRNOP00000047954.3 pep primary_assembly:mRatBN7.2:MT:14136:15278:1 gene:ENSRNOG00000031766.3 transcript:ENSRNOT00000042098.3 gene_biotype:protein_coding transcript_biotype:protein_coding gene_symbol:Mt-cyb description:mitochondrially encoded cytochrome b	1	1	1	1	2.4	43.012	753250	764690	1028700	848880	1100200	1075000	1156200	1.11047e+06	0.764435	0.048353
ENSRNOP00000078432	FHF complex subunit HOOK int	Fhip1b	ENSRNOP00000078432.1;ENSRNOP00000023502.7	ENSRNOP00000078432.1 pep primary_assembly:mRatBN7.2:1:159726004:159748408:-1 gene:ENSRNOG00000017408.8 transcript:ENSRNOT00000106363.1 gene_biotype:protein_coding transcript_biotype:protein_coding gene_symbol:Fhip1b description:FHF complex subunit HOOK int	2	4	4	4	6.7	98.987	194210	211090	222980	209427	301640	282550	254590	279593	0.74904	0.0118508
ENSRNOP00000078326	similar to expressed seque	RGD1305938	ENSRNOP00000078326.1;ENSRNOP00000069531.2	ENSRNOP00000078326.1 pep primary_assembly:mRatBN7.2:2:53189790:53200543:-1 gene:ENSRNOG00000052775.2 transcript:ENSRNOT00000096245.1 gene_biotype:protein_coding transcript_biotype:protein_coding gene_symbol:RGD1305938 description:similar to expressed seque	2	2	2	2	12.7	30.898	70025	72399	49433	63952.3	92710	83396	84643	86916.3	0.735792	0.0430855
ENSRNOP00000033579	nucleoporin 214	Nup214	ENSRNOP00000033579.6	ENSRNOP00000033579.6 pep primary_assembly:mRatBN7.2:3:15255119:15340568:1 gene:ENSRNOG00000023393.8 transcript:ENSRNOT00000037164.8 gene_biotype:protein_coding transcript_biotype:protein_coding gene_symbol:Nup214 description:nucleoporin 214 [Source:RGD Sym	1	2	2	2	1.1	211.51	34065	28589	23944	28866	41946	37158	40072	39725.3	0.72664	0.0285178
ENSRNOP00000075022	armadillo repeat containing 9	Armc9	ENSRNOP00000075022.2;ENSRNOP00000059344.4;ENSRNOP00000093397.1;ENSRNOP00000093331.1	ENSRNOP00000075022.2 pep primary_assembly:mRatBN7.2:9:86802868:86928606:1 gene:ENSRNOG00000025418.7 transcript:ENSRNOT00000088525.2 gene_biotype:protein_coding transcript_biotype:protein_coding gene_symbol:Armc9 description:armadillo repeat containing 9 [S	4	1	1	1	1.9	87.451	28647	31387	27144	29059.3	36943	38997	44441	40127	0.724184	0.0123936
ENSRNOP00000094347	pinin, desmosome associated protei	Pnn	ENSRNOP00000094347.1	ENSRNOP00000094347.1 pep primary_assembly:mRatBN7.2:6:76758155:76766878:1 gene:ENSRNOG00000004061.6 transcript:ENSRNOT00000096071.1 gene_biotype:protein_coding transcript_biotype:protein_coding gene_symbol:Pnn description:pinin, desmosome associated protei	1	1	1	1	2.3	77.767	55055	58815	48773	54214.3	81485	79446	66183	75704.7	0.716129	0.0187231
ENSRNOP00000052365	ubiquitin-conjugating enzyme E	Ube2z	ENSRNOP00000052365.2	ENSRNOP00000052365.2 pep primary_assembly:mRatBN7.2:10:80997817:81016936:-1 gene:ENSRNOG00000006868.5 transcript:ENSRNOT00000055500.3 gene_biotype:protein_coding transcript_biotype:protein_coding gene_symbol:Ube2z description:ubiquitin-conjugating enzyme E	1	8	8	8	26.4	38.352	321560	373570	357370	350833	548400	449280	484850	494177	0.709935	0.0119801
ENSRNOP00000097012	COBW domain containing 1	Cbwd1	ENSRNOP00000097012.1;ENSRNOP00000087771.1;ENSRNOP00000081535.1;ENSRNOP00000088617.1;ENSRNOP00000021185.3;ENSRNOP00000081860.1	ENSRNOP00000097012.1 pep primary_assembly:mRatBN7.2:1:222568278:222610629:-1 gene:ENSRNOG00000015516.8 transcript:ENSRNOT00000104262.1 gene_biotype:protein_coding transcript_biotype:protein_coding gene_symbol:Cbwd1 description:COBW domain containing 1 [Sou	6	3	3	3	11.9	40.169	121430	144490	132940	132953	176880	216180	174840	189300	0.702342	0.0198781
ENSRNOP00000084950	NADH:ubiquinone oxidoreductase s	Ndufv3	ENSRNOP00000084950.1;ENSRNOP00000038094.1	ENSRNOP00000084950.1 pep primary_assembly:mRatBN7.2:20:9612431:9623074:1 gene:ENSRNOG00000001182.8 transcript:ENSRNOT00000098355.1 gene_biotype:protein_coding transcript_biotype:protein_coding gene_symbol:Ndufv3 description:NADH:ubiquinone oxidoreductase s	2	3	2	2	38.9	11.941	1265100	1371600	1489400	1.37537e+06	2142000	1962000	1774000	1.95933e+06	0.701956	0.00935634
ENSRNOP00000013963	coiled-coil domain containin	Ccdc32	ENSRNOP00000013963.4	ENSRNOP00000013963.4 pep primary_assembly:mRatBN7.2:3:105998430:106010975:-1 gene:ENSRNOG00000010472.8 transcript:ENSRNOT00000013963.8 gene_biotype:protein_coding transcript_biotype:protein_coding gene_symbol:Ccdc32 description:coiled-coil domain containin	1	3	3	3	25.7	20.018	157990	198580	202210	186260	231840	312210	266930	270327	0.689018	0.0367145
ENSRNOP00000090887	CDK5 regulatory subunit ass	Cdk5rap3	ENSRNOP00000090887.1;ENSRNOP00000082694.1;ENSRNOP00000065240.2	ENSRNOP00000090887.1 pep primary_assembly:mRatBN7.2:10:81894397:81903563:-1 gene:ENSRNOG00000048747.3 transcript:ENSRNOT00000097303.1 gene_biotype:protein_coding transcript_biotype:protein_coding gene_symbol:Cdk5rap3 description:CDK5 regulatory subunit ass	3	3	3	3	6.4	57.003	47005	70780	54611	57465.3	86910	96705	73069	85561.3	0.671627	0.0456852
ENSRNOP00000091205	regulator of microtubule dynami	Rmdn2	ENSRNOP00000091205.1;ENSRNOP00000008045.4;ENSRNOP00000094581.1	ENSRNOP00000091205.1 pep primary_assembly:mRatBN7.2:6:15383496:15441480:-1 gene:ENSRNOG00000006082.7 transcript:ENSRNOT00000099426.1 gene_biotype:protein_coding transcript_biotype:protein_coding gene_symbol:Rmdn2 description:regulator of microtubule dynami	3	1	1	1	4.2	43.266	17256	14044	17310	16203.3	21823	25601	25089	24171	0.670363	0.00763019
ENSRNOP00000027756	fatty acid desaturase 2	Fads2	ENSRNOP00000027756.6;ENSRNOP00000083431.1;ENSRNOP00000088570.1	ENSRNOP00000027756.6 pep primary_assembly:mRatBN7.2:1:206708785:206747142:-1 gene:ENSRNOG00000020440.7 transcript:ENSRNOT00000027756.7 gene_biotype:protein_coding transcript_biotype:protein_coding gene_symbol:Fads2 description:fatty acid desaturase 2 [Sour	3	4	4	4	11.9	52.38	45571	52649	72561	56927	83354	88520	84221	85365	0.666866	0.0259857
ENSRNOP00000050872	lemur tyrosine kinase 2	Lmtk2	ENSRNOP00000050872.4;ENSRNOP00000083057.1	ENSRNOP00000050872.4 pep primary_assembly:mRatBN7.2:12:10426777:10508750:-1 gene:ENSRNOG00000025155.7 transcript:ENSRNOT00000046381.5 gene_biotype:protein_coding transcript_biotype:protein_coding gene_symbol:Lmtk2 description:lemur tyrosine kinase 2 [Sourc	2	3	3	3	3.4	176.48	57273	50405	59035	55571	82061	85180		83620.5	0.664562	0.00437145
ENSRNOP00000063787	phosphorylase kinase r	AABR07037995.1	ENSRNOP00000063787.4;ENSRNOP00000086931.1;ENSRNOP00000078653.1;ENSRNOP00000083353.1	ENSRNOP00000063787.4 pep primary_assembly:mRatBN7.2:X:34224706:34293466:-1 gene:ENSRNOG00000003949.8 transcript:ENSRNOT00000065678.4 gene_biotype:protein_coding transcript_biotype:protein_coding gene_symbol:AABR07037995.1 description:phosphorylase kinase r	4	3	3	3	9.3	60.544	102630	105890	112580	107033	149850	187530	146590	161323	0.663471	0.0156873
ENSRNOP00000078628	phospholipase C beta 3	Plcb3	ENSRNOP00000078628.1;ENSRNOP00000028720.5	ENSRNOP00000078628.1 pep primary_assembly:mRatBN7.2:1:204144956:204160216:-1 gene:ENSRNOG00000021150.7 transcript:ENSRNOT00000098773.1 gene_biotype:protein_coding transcript_biotype:protein_coding gene_symbol:Plcb3 description:phospholipase C beta 3 [Sourc	2	4	4	4	5.5	139.03	75187	96810	63053	78350	117050	130810	127270	125043	0.626583	0.0120239
ENSRNOP00000095189	dipeptidylpeptidase 7	Dpp7	ENSRNOP00000095189.1;ENSRNOP00000017271.2	ENSRNOP00000095189.1 pep primary_assembly:mRatBN7.2:3:8165091:8169355:-1 gene:ENSRNOG00000012640.4 transcript:ENSRNOT00000115633.1 gene_biotype:protein_coding transcript_biotype:protein_coding gene_symbol:Dpp7 description:dipeptidylpeptidase 7 [Source:RGD	2	5	5	5	16.9	53.767	450710	437170	538000	475293	724410	816460	756330	765733	0.620703	0.00220402
ENSRNOP00000078753	Rho/Rac guanine nucleotide exc	Arhgef18	ENSRNOP00000078753.1;ENSRNOP00000062255.2;ENSRNOP00000089688.1	ENSRNOP00000078753.1 pep primary_assembly:mRatBN7.2:12:1395088:1503081:1 gene:ENSRNOG00000028090.5 transcript:ENSRNOT00000110862.1 gene_biotype:protein_coding transcript_biotype:protein_coding gene_symbol:Arhgef18 description:Rho/Rac guanine nucleotide exc	3	5	5	5	8.7	128.21	110370	118420	130120	119637	196780	184870	216760	199470	0.599773	0.00186749
ENSRNOP00000016776	BH3 interacting domain death ag	Bid	ENSRNOP00000016776.2;ENSRNOP00000078364.1	ENSRNOP00000016776.2 pep primary_assembly:mRatBN7.2:4:154113198:154134720:-1 gene:ENSRNOG00000012439.3 transcript:ENSRNOT00000016776.3 gene_biotype:protein_coding transcript_biotype:protein_coding gene_symbol:Bid description:BH3 interacting domain death ag	2	2	2	2	18.4	22.249	48157	36382	53100	45879.7	68805	96272	65052	76709.7	0.598095	0.0489246
ENSRNOP00000047160	LDL receptor related protein 1B	Lrp1b	ENSRNOP00000047160.5;ENSRNOP00000096806.1	ENSRNOP00000047160.5 pep primary_assembly:mRatBN7.2:3:24594991:26715505:-1 gene:ENSRNOG00000030243.5 transcript:ENSRNOT00000044209.5 gene_biotype:protein_coding transcript_biotype:protein_coding gene_symbol:Lrp1b description:LDL receptor related protein 1B	2	6	5	5	1.9	496.56	65302	59738	61359	62133	117440	96944	99042	104475	0.594715	0.00323723
ENSRNOP00000087236	thyroid hormone receptor intera	Trip4	ENSRNOP00000087236.1;ENSRNOP00000021863.4;ENSRNOP00000071531.1;ENSRNOP00000086378.1;ENSRNOP00000097416.1	ENSRNOP00000087236.1 pep primary_assembly:mRatBN7.2:8:66353501:66439456:-1 gene:ENSRNOG00000016121.8 transcript:ENSRNOT00000102927.1 gene_biotype:protein_coding transcript_biotype:protein_coding gene_symbol:Trip4 description:thyroid hormone receptor intera	5	3	3	3	7.8	61.177	43105	49967	30768	41280	77580	79640	55816	71012	0.58131	0.0348329
ENSRNOP00000073131	ribonuclease A family member 4	Rnase4	ENSRNOP00000073131.2;ENSRNOP00000043003.2	ENSRNOP00000073131.2 pep primary_assembly:mRatBN7.2:15:24312557:24330117:1 gene:ENSRNOG00000025625.6 transcript:ENSRNOT00000089631.2 gene_biotype:protein_coding transcript_biotype:protein_coding gene_symbol:Rnase4 description:ribonuclease A family member 4	2	5	5	5	42.9	16.903	105870	79501		92685.5	138500	165480	176560	160180	0.578633	0.0312182
ENSRNOP00000028929	myosin 1C	Myo1c	ENSRNOP00000028929.6;ENSRNOP00000080420.1;ENSRNOP00000096158.1;ENSRNOP00000097261.1	ENSRNOP00000028929.6 pep primary_assembly:mRatBN7.2:10:60503411:60520752:1 gene:ENSRNOG00000004072.7 transcript:ENSRNOT00000036666.6 gene_biotype:protein_coding transcript_biotype:protein_coding gene_symbol:Myo1c description:myosin 1C [Source:RGD Symbol;Ac	4	6	6	6	9.7	112.87	121000	117240	85419	107886	189110	214080	160070	187753	0.574617	0.014296
ENSRNOP00000061490	zinc finger, SWIM-type containi	Zswim8	ENSRNOP00000061490.4;ENSRNOP00000075092.1;ENSRNOP00000094531.1;ENSRNOP00000076550.1	ENSRNOP00000061490.4 pep primary_assembly:mRatBN7.2:15:3573780:3589487:-1 gene:ENSRNOG00000056617.2 transcript:ENSRNOT00000063831.5 gene_biotype:protein_coding transcript_biotype:protein_coding gene_symbol:Zswim8 description:zinc finger, SWIM-type containi	4	2	2	2	1.7	193.28	18036	20147	14339	17507.3	37090	31983	24753	31275.3	0.559781	0.0254471
ENSRNOP00000080160	RNA polymerase II subunit C [	Polr2c	ENSRNOP00000080160.1;ENSRNOP00000081118.1;ENSRNOP00000021639.4	ENSRNOP00000080160.1 pep primary_assembly:mRatBN7.2:19:10157823:10164945:-1 gene:ENSRNOG00000015720.6 transcript:ENSRNOT00000106009.1 gene_biotype:protein_coding transcript_biotype:protein_coding gene_symbol:Polr2c description:RNA polymerase II subunit C [	3	2	2	2	11.6	31.443	49265	56839	66509	57537.7	98066	133670	91491	107742	0.53403	0.0231493
ENSRNOP00000021583	tetratricopeptide repeat domai	Ttc38	ENSRNOP00000021583.6	ENSRNOP00000021583.6 pep primary_assembly:mRatBN7.2:7:116925257:116948611:1 gene:ENSRNOG00000015916.8 transcript:ENSRNOT00000021582.8 gene_biotype:protein_coding transcript_biotype:protein_coding gene_symbol:Ttc38 description:tetratricopeptide repeat domai	1	1	1	1	1.8	57.058	11052	15918	15551	14173.7	24249	29722		26985.5	0.525233	0.0209447
ENSRNOP00000041634	syndecan 3	Sdc3	ENSRNOP00000041634.2	ENSRNOP00000041634.2 pep primary_assembly:mRatBN7.2:5:142965591:142996480:1 gene:ENSRNOG00000011927.8 transcript:ENSRNOT00000048781.5 gene_biotype:protein_coding transcript_biotype:protein_coding gene_symbol:Sdc3 description:syndecan 3 [Source:RGD Symbol;A	1	2	2	2	5.7	45.889		46580	38353	42466.5	83587	79451		81519	0.52094	0.0136159
ENSRNOP00000092844	Bri3 binding protein	Bri3bp	ENSRNOP00000092844.1	ENSRNOP00000092844.1 pep primary_assembly:mRatBN7.2:12:31173971:31188572:-1 gene:ENSRNOG00000063640.1 transcript:ENSRNOT00000104714.1 gene_biotype:protein_coding transcript_biotype:protein_coding gene_symbol:Bri3bp description:Bri3 binding protein [Source:	1	2	2	2	12.3	29.912	401420	261150		331285	672550	855870	661110	729843	0.453912	0.0259546
ENSRNOP00000098006	nuclear receptor coactivator	Ncoa5	ENSRNOP00000098006.1;ENSRNOP00000024214.4;ENSRNOP00000092337.1	ENSRNOP00000098006.1 pep primary_assembly:mRatBN7.2:3:153736430:153748754:-1 gene:ENSRNOG00000017824.7 transcript:ENSRNOT00000108161.1 gene_biotype:protein_coding transcript_biotype:protein_coding gene_symbol:Ncoa5 description:nuclear receptor coactivator	3	6	6	6	16.3	66.019	42797	140070	107540	96802.3	236730	226690	177470	213630	0.453131	0.0262661
ENSRNOP00000033101	plexin D1	Plxnd1	ENSRNOP00000033101.6	ENSRNOP00000033101.6 pep primary_assembly:mRatBN7.2:4:149002784:149043244:-1 gene:ENSRNOG00000025209.7 transcript:ENSRNOT00000032158.7 gene_biotype:protein_coding transcript_biotype:protein_coding gene_symbol:Plxnd1 description:plexin D1 [Source:RGD Symbol	1	2	2	2	1.3	218.81	27514	23249	9190.4	19984.5	45067	41977	49092	45378.7	0.440393	0.012652
ENSRNOP00000092826			ENSRNOP00000092826.1;ENSRNOP00000000118.3	ENSRNOP00000092826.1 pep primary_assembly:mRatBN7.2:15:99968282:99993455:-1 gene:ENSRNOG00000027040.5 transcript:ENSRNOT00000119176.1 gene_biotype:protein_coding transcript_biotype:protein_coding;ENSRNOP00000000118.3 pep primary_assembly:mRatBN7.2:15:99969	2	3	3	3	25.5	16.925	85662	112090	48218	81990	163480	217490		190485	0.430428	0.0403352
ENSRNOP00000000468	solute carrier family 35, mem	Slc35f1	ENSRNOP00000000468.8	ENSRNOP00000000468.8 pep primary_assembly:mRatBN7.2:20:32030368:32418611:1 gene:ENSRNOG00000000412.6 transcript:ENSRNOT00000000468.6 gene_biotype:protein_coding transcript_biotype:protein_coding gene_symbol:Slc35f1 description:solute carrier family 35, mem	1	1	1	1	2.7	45.372	10763	14949	17453	14388.3	32019	40137		36078	0.398812	0.011775
ENSRNOP00000097401	mitochondrial transcription r	Mtres1	ENSRNOP00000097401.1;ENSRNOP00000065494.2;ENSRNOP00000089834.1	ENSRNOP00000097401.1 pep primary_assembly:mRatBN7.2:20:47022345:47038805:-1 gene:ENSRNOG00000047118.3 transcript:ENSRNOT00000097351.1 gene_biotype:protein_coding transcript_biotype:protein_coding gene_symbol:Mtres1 description:mitochondrial transcription r	3	2	2	2	11.7	27.521	110640	19965	49817	60140.7	165260	186420	194080	181920	0.330589	0.0122194
ENSRNOP00000096119	BCL2 interacting protein 3	Bnip3	ENSRNOP00000096119.1;ENSRNOP00000023477.4;ENSRNOP00000081610.1;ENSRNOP00000079635.1;ENSRNOP00000071075.1	ENSRNOP00000096119.1 pep primary_assembly:mRatBN7.2:1:193709273:193725359:-1 gene:ENSRNOG00000017243.7 transcript:ENSRNOT00000094035.1 gene_biotype:protein_coding transcript_biotype:protein_coding gene_symbol:Bnip3 description:BCL2 interacting protein 3 [S	5	2	2	2	13.3	19.38	64985	20946	9834.4	31921.8	116830	107260	142930	122340	0.260927	0.0105227
ENSRNOP00000086456	similar to U1 small nuclear ribonucleoprotein C		ENSRNOP00000086456.1;ENSRNOP00000000586.6;ENSRNOP00000094321.1;ENSRNOP00000080304.1	ENSRNOP00000086456.1 pep primary_assembly:mRatBN7.2:10:14191662:14192401:-1 gene:ENSRNOG00000017586.3 transcript:ENSRNOT00000023626.3 gene_biotype:protein_coding transcript_biotype:protein_coding description:similar to U1 small nuclear ribonucleoprotein C	4	2	2	2	18.9	17.391	283710	268050	285930	279230	302970	308400	297590	302987	0.921592	0.0209757
ENSRNOP00000089402			ENSRNOP00000089402.1;ENSRNOP00000001154.5;ENSRNOP00000094400.1;ENSRNOP00000088340.1	ENSRNOP00000089402.1 pep primary_assembly:mRatBN7.2:X:135305325:135314743:-1 gene:ENSRNOG00000000866.8 transcript:ENSRNOT00000097092.1 gene_biotype:protein_coding transcript_biotype:protein_coding;ENSRNOP00000001154.5 pep primary_assembly:mRatBN7.2:X:13530	4	6	6	2	17.2	42.257	1760200	1871400	2037700	1.88977e+06	1692400	1626200	1640600	1.65307e+06	1.14319	0.0464718
ENSRNOP00000001228	phosphoserine phosphatase	Psph	ENSRNOP00000001228.4;ENSRNOP00000097878.1	ENSRNOP00000001228.4 pep primary_assembly:mRatBN7.2:12:26883133:26905074:1 gene:ENSRNOG00000000925.8 transcript:ENSRNOT00000001228.8 gene_biotype:protein_coding transcript_biotype:protein_coding gene_symbol:Psph description:phosphoserine phosphatase [Sourc	2	6	6	6	32	24.967	456390	408510	429700	431533	382130	339830	386810	369590	1.1676	0.0383934
ENSRNOP00000001476	WD repeat domain, phosphoinosi	Wipi2	ENSRNOP00000001476.3	ENSRNOP00000001476.3 pep primary_assembly:mRatBN7.2:12:11911337:11939794:-1 gene:ENSRNOG00000001114.6 transcript:ENSRNOT00000001476.6 gene_biotype:protein_coding transcript_biotype:protein_coding gene_symbol:Wipi2 description:WD repeat domain, phosphoinosi	1	9	9	9	41.1	48.519	1343400	1271700	1340500	1.31853e+06	1209000	1139000	1160700	1.16957e+06	1.12737	0.00886739
ENSRNOP00000002327	ATP binding cassette subfamily	Abcf3	ENSRNOP00000002327.5;ENSRNOP00000076934.1	ENSRNOP00000002327.5 pep primary_assembly:mRatBN7.2:11:80340477:80352211:-1 gene:ENSRNOG00000001710.6 transcript:ENSRNOT00000002327.6 gene_biotype:protein_coding transcript_biotype:protein_coding gene_symbol:Abcf3 description:ATP binding cassette subfamily	2	4	4	4	8.6	79.827	75472	80176	90285	81977.7	64649	71324	69826	68599.7	1.19502	0.049905
ENSRNOP00000002484	eukaryotic translation initia	Eif4a2	ENSRNOP00000002484.6	ENSRNOP00000002484.6 pep primary_assembly:mRatBN7.2:11:77764124:77769709:-1 gene:ENSRNOG00000001815.7 transcript:ENSRNOT00000002484.7 gene_biotype:protein_coding transcript_biotype:protein_coding gene_symbol:Eif4a2 description:eukaryotic translation initia	1	18	2	2	58.5	36.081	1489600	1416800	1323200	1.40987e+06	1529400	1669700	1565500	1588200	0.887714	0.0493634
ENSRNOP00000090549	coiled-coil domain containing	Ccdc93	ENSRNOP00000090549.1;ENSRNOP00000003435.5;ENSRNOP00000091786.1	ENSRNOP00000090549.1 pep primary_assembly:mRatBN7.2:13:32613938:32673353:1 gene:ENSRNOG00000002514.8 transcript:ENSRNOT00000110193.1 gene_biotype:protein_coding transcript_biotype:protein_coding gene_symbol:Ccdc93 description:coiled-coil domain containing	3	10	10	10	18.4	68.706	456240	483870	453990	464700	537680	557060	492770	529170	0.878168	0.0390497
ENSRNOP00000003715	vacuolar protein sorting 4 hom	Vps4b	ENSRNOP00000003715.4;ENSRNOP00000089387.1;ENSRNOP00000078689.1;ENSRNOP00000005857.3	ENSRNOP00000003715.4 pep primary_assembly:mRatBN7.2:13:22907109:22932229:-1 gene:ENSRNOG00000002705.5 transcript:ENSRNOT00000003715.5 gene_biotype:protein_coding transcript_biotype:protein_coding gene_symbol:Vps4b description:vacuolar protein sorting 4 hom	4	5	4	4	19.1	46.609	316740	309000	300140	308627	348900	330620	327130	335550	0.919764	0.0313353
ENSRNOP00000092560	LUC7-like 3 pre-mRNA splicing	Luc7l3	ENSRNOP00000092560.1;ENSRNOP00000091946.1;ENSRNOP00000083384.1;ENSRNOP00000003914.4	ENSRNOP00000092560.1 pep primary_assembly:mRatBN7.2:10:79241562:79276538:-1 gene:ENSRNOG00000002835.7 transcript:ENSRNOT00000111455.1 gene_biotype:protein_coding transcript_biotype:protein_coding gene_symbol:Luc7l3 description:LUC7-like 3 pre-mRNA splicing	4	4	4	3	9.2	55.569	190800	174880	163300	176327	154330	153500	141560	149797	1.17711	0.041729
ENSRNOP00000004692	O-linked N-acetylglucosamine (GlcN	Ogt	ENSRNOP00000004692.5;ENSRNOP00000086509.1	ENSRNOP00000004692.5 pep primary_assembly:mRatBN7.2:X:66771349:66816146:1 gene:ENSRNOG00000003359.8 transcript:ENSRNOT00000004692.8 gene_biotype:protein_coding transcript_biotype:protein_coding gene_symbol:Ogt description:O-linked N-acetylglucosamine (GlcN	2	30	1	1	39.9	115.73	587270	579450	573900	580207	610190	687300	639240	645577	0.898742	0.0456945
ENSRNOP00000005031	heme oxygenase 2	Hmox2	ENSRNOP00000005031.2;ENSRNOP00000075102.2;ENSRNOP00000084166.1	ENSRNOP00000005031.2 pep primary_assembly:mRatBN7.2:10:10797081:10831137:-1 gene:ENSRNOG00000003773.7 transcript:ENSRNOT00000005031.6 gene_biotype:protein_coding transcript_biotype:protein_coding gene_symbol:Hmox2 description:heme oxygenase 2 [Source:RGD S	3	12	12	12	54.9	35.762	2329700	2285500	2362800	2326000	2243500	2162700	2180700	2.19563e+06	1.05938	0.0171229
ENSRNOP00000089319	GIPC PDZ domain containing fam	Gipc1	ENSRNOP00000089319.1;ENSRNOP00000005374.3;ENSRNOP00000082767.1	ENSRNOP00000089319.1 pep primary_assembly:mRatBN7.2:19:24476081:24480327:-1 gene:ENSRNOG00000003864.6 transcript:ENSRNOT00000105318.1 gene_biotype:protein_coding transcript_biotype:protein_coding gene_symbol:Gipc1 description:GIPC PDZ domain containing fam	3	8	8	8	42.8	32.929	566770	594800	528630	563400	663890	641860	616440	640730	0.87931	0.0304853
ENSRNOP00000006329	NSF attachment protein beta	Napb	ENSRNOP00000006329.5;ENSRNOP00000083784.1	ENSRNOP00000006329.5 pep primary_assembly:mRatBN7.2:3:136133428:136179345:-1 gene:ENSRNOG00000004753.7 transcript:ENSRNOT00000006329.7 gene_biotype:protein_coding transcript_biotype:protein_coding gene_symbol:Napb description:NSF attachment protein beta [S	2	26	26	23	82.6	33.557	38477000	38214000	40059000	3.89167e+07	42717000	41811000	41241000	41923000	0.928289	0.0138913
ENSRNOP00000006403	Rho-associated coiled-coil conta	Rock2	ENSRNOP00000006403.8;ENSRNOP00000073496.1;ENSRNOP00000091227.1;ENSRNOP00000088194.1	ENSRNOP00000006403.8 pep primary_assembly:mRatBN7.2:6:39679371:39766576:1 gene:ENSRNOG00000004496.8 transcript:ENSRNOT00000006403.8 gene_biotype:protein_coding transcript_biotype:protein_coding gene_symbol:Rock2 description:Rho-associated coiled-coil conta	4	41	41	37	36.4	160.19	6656300	6461200	7101100	6.73953e+06	7288500	7607400	7696900	7.53093e+06	0.894913	0.0249641
ENSRNOP00000007993	leucine rich repeat transmemb	LRRTM1	ENSRNOP00000007993.5	ENSRNOP00000007993.5 pep primary_assembly:mRatBN7.2:4:109701815:109717184:1 gene:ENSRNOG00000006093.6 transcript:ENSRNOT00000007993.6 gene_biotype:protein_coding transcript_biotype:protein_coding gene_symbol:LRRTM1 description:leucine rich repeat transmemb	1	7	7	7	18.2	58.731	712400	683140	756160	717233	832960	792200	869250	831470	0.862609	0.0205597
ENSRNOP00000008120	dynactin subunit 2	Dctn2	ENSRNOP00000008120.4;ENSRNOP00000080467.1;ENSRNOP00000096519.1;ENSRNOP00000069048.1;ENSRNOP00000086082.1;ENSRNOP00000081052.1	ENSRNOP00000008120.4 pep primary_assembly:mRatBN7.2:7:63092057:63107552:1 gene:ENSRNOG00000025481.5 transcript:ENSRNOT00000008120.5 gene_biotype:protein_coding transcript_biotype:protein_coding gene_symbol:Dctn2 description:dynactin subunit 2 [Source:RGD S	6	18	18	18	61.2	44.147	11641000	11649000	11426000	11572000	12335000	12292000	12078000	12235000	0.945811	0.00356211
ENSRNOP00000008726	OTU deubiquitinase 6B	Otud6b	ENSRNOP00000008726.7;ENSRNOP00000076285.2;ENSRNOP00000076236.2;ENSRNOP00000086210.1	ENSRNOP00000008726.7 pep primary_assembly:mRatBN7.2:5:28197325:28214334:-1 gene:ENSRNOG00000006636.8 transcript:ENSRNOT00000008725.8 gene_biotype:protein_coding transcript_biotype:protein_coding gene_symbol:Otud6b description:OTU deubiquitinase 6B [Source:	4	6	6	6	29.7	36.274	362490	363010	386250	370583	425800	415110	397500	412803	0.897724	0.0206409
ENSRNOP00000008868	RAB33A, member RAS oncogene f	Rab33a	ENSRNOP00000008868.2	ENSRNOP00000008868.2 pep primary_assembly:mRatBN7.2:X:127694964:127706378:1 gene:ENSRNOG00000006698.7 transcript:ENSRNOT00000008868.5 gene_biotype:protein_coding transcript_biotype:protein_coding gene_symbol:Rab33a description:RAB33A, member RAS oncogene f	1	5	5	5	28.7	26.583	351290	410260	394470	385340	461560	483660	437280	460833	0.836181	0.027018
ENSRNOP00000087931	SH3 domain containing GRB2 like	Sh3gl2	ENSRNOP00000087931.1;ENSRNOP00000008999.6;ENSRNOP00000088763.1;ENSRNOP00000081211.1	ENSRNOP00000087931.1 pep primary_assembly:mRatBN7.2:5:99653152:99827500:1 gene:ENSRNOG00000006761.8 transcript:ENSRNOT00000110787.1 gene_biotype:protein_coding transcript_biotype:protein_coding gene_symbol:Sh3gl2 description:SH3 domain containing GRB2 like	4	18	18	15	63.1	39.041	41958000	43155000	44642000	4.32517e+07	48893000	45052000	48741000	47562000	0.909374	0.0432612
ENSRNOP00000009866	signal recognition particle 1	Srp14	ENSRNOP00000009866.6;ENSRNOP00000076968.1	ENSRNOP00000009866.6 pep primary_assembly:mRatBN7.2:3:105442198:105445859:-1 gene:ENSRNOG00000007512.6 transcript:ENSRNOT00000009866.6 gene_biotype:protein_coding transcript_biotype:protein_coding gene_symbol:Srp14 description:signal recognition particle 1	2	1	1	1	14.1	11.231	154830	144410	150490	149910	160240	156830	159470	158847	0.94374	0.0488905
ENSRNOP00000096572	extracellular leucine-rich re	Elfn2	ENSRNOP00000096572.1;ENSRNOP00000095002.1;ENSRNOP00000010609.3	ENSRNOP00000096572.1 pep primary_assembly:mRatBN7.2:7:110225919:110272050:-1 gene:ENSRNOG00000007934.5 transcript:ENSRNOT00000105973.1 gene_biotype:protein_coding transcript_biotype:protein_coding gene_symbol:Elfn2 description:extracellular leucine-rich re	3	12	12	9	18	89.959	1482700	1543700	1422100	1.48283e+06	1668300	1579100	1611100	1619500	0.915612	0.035364
ENSRNOP00000011380	ubiquitin protein ligase E3 compo	Ubr3	ENSRNOP00000011380.8	ENSRNOP00000011380.8 pep primary_assembly:mRatBN7.2:3:54649992:54806247:1 gene:ENSRNOG00000008616.9 transcript:ENSRNOT00000011380.9 gene_biotype:protein_coding transcript_biotype:protein_coding gene_symbol:Ubr3 description:ubiquitin protein ligase E3 compo	1	2	2	2	1.6	212.89	33984	35350		34667	39170	37902	41427	39499.7	0.877653	0.042722
ENSRNOP00000086284	gamma-aminobutyric acid type B	Gabbr2	ENSRNOP00000086284.1;ENSRNOP00000011573.5;ENSRNOP00000085600.1	ENSRNOP00000086284.1 pep primary_assembly:mRatBN7.2:5:60947526:61288104:-1 gene:ENSRNOG00000008431.5 transcript:ENSRNOT00000103037.1 gene_biotype:protein_coding transcript_biotype:protein_coding gene_symbol:Gabbr2 description:gamma-aminobutyric acid type B	3	11	11	11	19.9	97.534	1154600	1080600	1225800	1.15367e+06	1305900	1309300	1257500	1290900	0.893692	0.0383782
ENSRNOP00000086969	islet cell autoantigen 1	Ica1	ENSRNOP00000086969.1;ENSRNOP00000011651.5;ENSRNOP00000075191.1;ENSRNOP00000095862.1	ENSRNOP00000086969.1 pep primary_assembly:mRatBN7.2:4:36656475:36804298:-1 gene:ENSRNOG00000008628.8 transcript:ENSRNOT00000100899.1 gene_biotype:protein_coding transcript_biotype:protein_coding gene_symbol:Ica1 description:islet cell autoantigen 1 [Source	4	7	7	7	17.6	52.653	368560	383170	353710	368480	416510	449000	422410	429307	0.858314	0.00976674
ENSRNOP00000013046	DEAD-box helicase 42	Ddx42	ENSRNOP00000013046.5;ENSRNOP00000078905.1	ENSRNOP00000013046.5 pep primary_assembly:mRatBN7.2:10:91149439:91180938:1 gene:ENSRNOG00000009474.6 transcript:ENSRNOT00000013046.6 gene_biotype:protein_coding transcript_biotype:protein_coding gene_symbol:Ddx42 description:DEAD-box helicase 42 [Source:RG	2	6	6	6	11.1	102.07	234010	245860	248020	242630	274950	252640	274990	267527	0.906938	0.0446972
ENSRNOP00000013176	apurinic/apyrimidinic endodeoxy	Apex1	ENSRNOP00000013176.4;ENSRNOP00000068673.2	ENSRNOP00000013176.4 pep primary_assembly:mRatBN7.2:15:24144362:24146785:1 gene:ENSRNOG00000009663.6 transcript:ENSRNOT00000013176.6 gene_biotype:protein_coding transcript_biotype:protein_coding gene_symbol:Apex1 description:apurinic/apyrimidinic endodeoxy	2	11	11	11	56.2	34.589	1666400	1616400	1717900	1666900	1532100	1607000	1516300	1551800	1.07417	0.0468108
ENSRNOP00000013563	syndecan binding protein	Sdcbp	ENSRNOP00000013563.5;ENSRNOP00000081603.1;ENSRNOP00000079793.1;ENSRNOP00000084825.1	ENSRNOP00000013563.5 pep primary_assembly:mRatBN7.2:5:19489967:19517187:1 gene:ENSRNOG00000009683.8 transcript:ENSRNOT00000013563.8 gene_biotype:protein_coding transcript_biotype:protein_coding gene_symbol:Sdcbp description:syndecan binding protein [Source	4	6	6	6	36	32.083	832620	848510	845980	842370	955990	964480	945770	955413	0.881681	0.000102499
ENSRNOP00000085445	eukaryotic translatio	NEWGENE_619861	ENSRNOP00000085445.1;ENSRNOP00000013695.6;ENSRNOP00000096885.1;ENSRNOP00000090306.1;ENSRNOP00000079321.1	ENSRNOP00000085445.1 pep primary_assembly:mRatBN7.2:6:130589870:130595962:1 gene:ENSRNOG00000010218.8 transcript:ENSRNOT00000102717.1 gene_biotype:protein_coding transcript_biotype:protein_coding gene_symbol:NEWGENE_619861 description:eukaryotic translatio	5	13	13	13	32.8	48.726	1618800	1585800	1585100	1.59657e+06	1436000	1398000	1348700	1.39423e+06	1.14512	0.00184514
ENSRNOP00000013900	ADP-ribosylation factor GTPa	Arfgap1	ENSRNOP00000013900.5;ENSRNOP00000073451.1;ENSRNOP00000051916.4	ENSRNOP00000013900.5 pep primary_assembly:mRatBN7.2:3:168084620:168099418:1 gene:ENSRNOG00000043150.5 transcript:ENSRNOT00000013900.7 gene_biotype:protein_coding transcript_biotype:protein_coding gene_symbol:Arfgap1 description:ADP-ribosylation factor GTPa	3	13	13	13	41.6	46.693	3355600	3414200	3795500	3.52177e+06	4158500	3839000	3980100	3.99253e+06	0.882088	0.0470802
ENSRNOP00000096405		AABR07026311.1	ENSRNOP00000096405.1;ENSRNOP00000073832.1;ENSRNOP00000013919.7;ENSRNOP00000083173.1;ENSRNOP00000081591.1;ENSRNOP00000079917.1;ENSRNOP00000083876.1;ENSRNOP00000096932.1;ENSRNOP00000065187.2;ENSRNOP00000084538.1	ENSRNOP00000096405.1 pep primary_assembly:mRatBN7.2:16:66654287:66655279:1 gene:ENSRNOG00000038375.4 transcript:ENSRNOT00000058436.4 gene_biotype:protein_coding transcript_biotype:protein_coding gene_symbol:AABR07026311.1;ENSRNOP00000073832.1 pep primary_a	10	5	3	3	32.5	13.223	943770	935110	1006100	961660	783170	894460	831450	836360	1.14982	0.0330618
ENSRNOP00000014230	SWI/SNF related, matrix asso	Smarce1	ENSRNOP00000014230.7;ENSRNOP00000074941.2	ENSRNOP00000014230.7 pep primary_assembly:mRatBN7.2:10:84159275:84179989:-1 gene:ENSRNOG00000010676.8 transcript:ENSRNOT00000014230.8 gene_biotype:protein_coding transcript_biotype:protein_coding gene_symbol:Smarce1 description:SWI/SNF related, matrix asso	2	4	4	4	14.9	42.831	168760	166760	162380	165967	179900	176360	173580	176613	0.939718	0.0154134
ENSRNOP00000014250	synapsin I	Syn1	ENSRNOP00000014250.5	ENSRNOP00000014250.5 pep primary_assembly:mRatBN7.2:X:1172208:1227396:1 gene:ENSRNOG00000010365.8 transcript:ENSRNOT00000014250.7 gene_biotype:protein_coding transcript_biotype:protein_coding gene_symbol:Syn1 description:synapsin I [Source:RGD Symbol;Acc:3	1	47	47	43	84.9	73.987	214920000	232600000	216010000	2.21177e+08	239730000	241300000	237150000	2.39393e+08	0.923905	0.0356768
ENSRNOP00000061650	heterogeneous nuclear ribonucleoprotein A3-like [		ENSRNOP00000061650.4;ENSRNOP00000014756.7;ENSRNOP00000079420.1;ENSRNOP00000079754.1;ENSRNOP00000087526.1;ENSRNOP00000022054.5;ENSRNOP00000082742.1	ENSRNOP00000061650.4 pep primary_assembly:mRatBN7.2:10:78217761:78218895:1 gene:ENSRNOG00000027006.7 transcript:ENSRNOT00000035567.7 gene_biotype:protein_coding transcript_biotype:protein_coding description:heterogeneous nuclear ribonucleoprotein A3-like [	7	22	2	2	53.3	34.113	883180	906820	857640	882547	793570	783250	835560	804127	1.09752	0.0214638
ENSRNOP00000015632	macroH2A.1 histone	Macroh2a1	ENSRNOP00000015632.5;ENSRNOP00000049143.4;ENSRNOP00000083083.1;ENSRNOP00000076427.1	ENSRNOP00000015632.5 pep primary_assembly:mRatBN7.2:17:8485886:8541561:1 gene:ENSRNOG00000011523.9 transcript:ENSRNOT00000015632.7 gene_biotype:protein_coding transcript_biotype:protein_coding gene_symbol:Macroh2a1 description:macroH2A.1 histone [Source:RG	4	14	14	12	52	39.198	3654000	3340100	3529500	3.50787e+06	3087700	3242400	3245100	3.19173e+06	1.09905	0.0395696
ENSRNOP00000088016	proteasome 26S subunit, ATPase 3	Psmc3	ENSRNOP00000088016.1;ENSRNOP00000015757.2;ENSRNOP00000082627.1	ENSRNOP00000088016.1 pep primary_assembly:mRatBN7.2:3:77031825:77037206:1 gene:ENSRNOG00000011414.6 transcript:ENSRNOT00000104701.1 gene_biotype:protein_coding transcript_biotype:protein_coding gene_symbol:Psmc3 description:proteasome 26S subunit, ATPase 3	3	20	20	20	59	44.669	3777900	3947500	3787800	3.83773e+06	4409700	4335900	4295200	4.34693e+06	0.88286	0.00138161
ENSRNOP00000016509	NADH:ubiquinone oxidoreductas	Ndufc2	ENSRNOP00000016509.3;ENSRNOP00000083853.1;ENSRNOP00000080738.1;ENSRNOP00000092166.1	ENSRNOP00000016509.3 pep primary_assembly:mRatBN7.2:1:151711901:151718189:1 gene:ENSRNOG00000012383.7 transcript:ENSRNOT00000016509.7 gene_biotype:protein_coding transcript_biotype:protein_coding gene_symbol:Ndufc2 description:NADH:ubiquinone oxidoreductas	4	8	8	8	45	14.359	7120800	6905500	7473600	7.16663e+06	7832100	7829300	7530200	7.73053e+06	0.927055	0.0435143
ENSRNOP00000016561	BCL2 like 13	Bcl2l13	ENSRNOP00000016561.6;ENSRNOP00000089429.1;ENSRNOP00000077885.1;ENSRNOP00000076532.1	ENSRNOP00000016561.6 pep primary_assembly:mRatBN7.2:4:154056127:154108983:1 gene:ENSRNOG00000012394.8 transcript:ENSRNOT00000016561.8 gene_biotype:protein_coding transcript_biotype:protein_coding gene_symbol:Bcl2l13 description:BCL2 like 13 [Source:RGD Sym	4	7	7	7	27.2	46.734	1925400	2005200	1875200	1.93527e+06	2085100	2102000	2120900	2.10267e+06	0.920387	0.0129881
ENSRNOP00000017396	RAB33B, member RAS oncogene f	Rab33b	ENSRNOP00000017396.4	ENSRNOP00000017396.4 pep primary_assembly:mRatBN7.2:2:135528116:135538719:1 gene:ENSRNOG00000013035.6 transcript:ENSRNOT00000017396.6 gene_biotype:protein_coding transcript_biotype:protein_coding gene_symbol:Rab33b description:RAB33B, member RAS oncogene f	1	3	3	3	20.5	25.752	391690	422290	362930	392303	462210	442600	437440	447417	0.876819	0.0422556
ENSRNOP00000017965	lactate dehydrogenase B	Ldhb	ENSRNOP00000017965.4	ENSRNOP00000017965.4 pep primary_assembly:mRatBN7.2:4:175428385:175446403:-1 gene:ENSRNOG00000013000.8 transcript:ENSRNOT00000017965.8 gene_biotype:protein_coding transcript_biotype:protein_coding gene_symbol:Ldhb description:lactate dehydrogenase B [Sourc	1	22	20	20	63.8	36.612	66472000	68526000	68683000	6.78937e+07	71884000	72074000	69829000	7.12623e+07	0.952729	0.0291321
ENSRNOP00000020149	RNA 3-terminal phosphate cycl	Rtca	ENSRNOP00000020149.4;ENSRNOP00000091195.1	ENSRNOP00000020149.4 pep primary_assembly:mRatBN7.2:2:204455175:204476460:-1 gene:ENSRNOG00000014575.6 transcript:ENSRNOT00000020149.6 gene_biotype:protein_coding transcript_biotype:protein_coding gene_symbol:Rtca description:RNA 3-terminal phosphate cycl	2	6	6	6	22	39.071	393460	401440	407470	400790	381820	375700	353680	370400	1.08205	0.032502
ENSRNOP00000021387	histidine triad nucleotide bind	Hint2	ENSRNOP00000021387.5	ENSRNOP00000021387.5 pep primary_assembly:mRatBN7.2:5:57904614:57907097:-1 gene:ENSRNOG00000015866.6 transcript:ENSRNOT00000021387.6 gene_biotype:protein_coding transcript_biotype:protein_coding gene_symbol:Hint2 description:histidine triad nucleotide bind	1	3	3	3	27.5	19.76	3002700	2766100	2998100	2922300	3534200	3411900	3421300	3455800	0.845622	0.00365075
ENSRNOP00000022049	amyloid beta precursor protein	Apba2	ENSRNOP00000022049.5;ENSRNOP00000093806.1	ENSRNOP00000022049.5 pep primary_assembly:mRatBN7.2:1:118103219:118285699:1 gene:ENSRNOG00000016358.7 transcript:ENSRNOT00000022049.7 gene_biotype:protein_coding transcript_biotype:protein_coding gene_symbol:Apba2 description:amyloid beta precursor protein	2	11	11	9	20.8	82.849	656270	624290	643680	641413	800690	777240	701790	759907	0.844069	0.0192444
ENSRNOP00000023637	complement C1q like 3	C1ql3	ENSRNOP00000023637.4;ENSRNOP00000066827.3	ENSRNOP00000023637.4 pep primary_assembly:mRatBN7.2:17:76119447:76128530:-1 gene:ENSRNOG00000017459.7 transcript:ENSRNOT00000023637.7 gene_biotype:protein_coding transcript_biotype:protein_coding gene_symbol:C1ql3 description:complement C1q like 3 [Source:	2	1	1	1	7.1	26.687	219290	198490	195390	204390	251770	250070	228020	243287	0.84012	0.0221579
ENSRNOP00000024917	angiotensinogen	Agt	ENSRNOP00000024917.4	ENSRNOP00000024917.4 pep primary_assembly:mRatBN7.2:19:52529185:52540977:-1 gene:ENSRNOG00000018445.5 transcript:ENSRNOT00000024917.5 gene_biotype:protein_coding transcript_biotype:protein_coding gene_symbol:Agt description:angiotensinogen [Source:RGD Symb	1	4	4	4	12	52.56	325400	336330	281160	314297	379120	370040	364140	371100	0.846933	0.0310554
ENSRNOP00000025675	adaptor related protein complex	Ap3m2	ENSRNOP00000025675.5	ENSRNOP00000025675.5 pep primary_assembly:mRatBN7.2:16:69217633:69235431:1 gene:ENSRNOG00000018650.6 transcript:ENSRNOT00000025675.6 gene_biotype:protein_coding transcript_biotype:protein_coding gene_symbol:Ap3m2 description:adaptor related protein complex	1	16	16	14	64.1	46.874	4285500	4459300	4353600	4.36613e+06	4601300	4822300	4827100	4.75023e+06	0.919141	0.012983
ENSRNOP00000025986	NAD(P)HX epimerase	Naxe	ENSRNOP00000025986.2	ENSRNOP00000025986.2 pep primary_assembly:mRatBN7.2:2:173518971:173521040:-1 gene:ENSRNOG00000019201.4 transcript:ENSRNOT00000025986.4 gene_biotype:protein_coding transcript_biotype:protein_coding gene_symbol:Naxe description:NAD(P)HX epimerase [Source:RGD	1	5	5	5	23	30.89	2189800	1979200	2231400	2.13347e+06	1919600	1828700	1801900	1.85007e+06	1.15318	0.0298529
ENSRNOP00000087138	A-kinase anchoring protein 12 [	Akap12	ENSRNOP00000087138.1;ENSRNOP00000070062.1;ENSRNOP00000026483.7;ENSRNOP00000057494.2	ENSRNOP00000087138.1 pep primary_assembly:mRatBN7.2:1:40804279:40819886:1 gene:ENSRNOG00000019549.9 transcript:ENSRNOT00000099245.1 gene_biotype:protein_coding transcript_biotype:protein_coding gene_symbol:Akap12 description:A-kinase anchoring protein 12 [	4	20	20	20	24.1	170.19	1036500	959870	959450	985273	906360	883480	900950	896930	1.0985	0.0290996
ENSRNOP00000078059	ankyrin repeat domain 28	Ankrd28	ENSRNOP00000078059.1;ENSRNOP00000026680.7;ENSRNOP00000081029.1;ENSRNOP00000095965.1;ENSRNOP00000089722.1;ENSRNOP00000070078.2;ENSRNOP00000015432.8;ENSRNOP00000091674.1	ENSRNOP00000078059.1 pep primary_assembly:mRatBN7.2:16:6921345:7000643:-1 gene:ENSRNOG00000019697.8 transcript:ENSRNOT00000098800.1 gene_biotype:protein_coding transcript_biotype:protein_coding gene_symbol:Ankrd28 description:ankyrin repeat domain 28 [Sour	8	7	7	7	11	107.03	161880	167530	167440	165617	198590	196870	193230	196230	0.843993	0.000234844
ENSRNOP00000026705	lamin A/C	Lmna	ENSRNOP00000026705.4;ENSRNOP00000068655.2;ENSRNOP00000076028.2;ENSRNOP00000072742.2	ENSRNOP00000026705.4 pep primary_assembly:mRatBN7.2:2:173939751:173960423:-1 gene:ENSRNOG00000019638.8 transcript:ENSRNOT00000026705.7 gene_biotype:protein_coding transcript_biotype:protein_coding gene_symbol:Lmna description:lamin A/C [Source:RGD Symbol;A	4	33	33	32	55.8	74.311	7325100	7082400	6969000	7125500	6881300	6616800	6488600	6.66223e+06	1.06954	0.0413146
ENSRNOP00000027061	Coenzyme A synthase	Coasy	ENSRNOP00000027061.2	ENSRNOP00000027061.2 pep primary_assembly:mRatBN7.2:10:86014597:86018841:1 gene:ENSRNOG00000019918.4 transcript:ENSRNOT00000027061.4 gene_biotype:protein_coding transcript_biotype:protein_coding gene_symbol:Coasy description:Coenzyme A synthase [Source:RGD	1	12	12	12	35.7	62.187	1374200	1368700	1307800	1.35023e+06	1483100	1456400	1593900	1.51113e+06	0.893524	0.0269942
ENSRNOP00000028064	solute carrier family 17 membe	Slc17a7	ENSRNOP00000028064.1;ENSRNOP00000063604.1;ENSRNOP00000023241.6;ENSRNOP00000056253.5;ENSRNOP00000061056.4;ENSRNOP00000070406.1;ENSRNOP00000075876.1	ENSRNOP00000028064.1 pep primary_assembly:mRatBN7.2:1:95649745:95661588:1 gene:ENSRNOG00000020650.8 transcript:ENSRNOT00000028064.6 gene_biotype:protein_coding transcript_biotype:protein_coding gene_symbol:Slc17a7 description:solute carrier family 17 membe	7	11	11	9	18.6	61.665	14243000	15146000	16804000	1.53977e+07	17427000	19358000	18126000	1.83037e+07	0.841234	0.0363612
ENSRNOP00000028821	VPS16 core subunit of CORVET a	Vps16	ENSRNOP00000028821.3;ENSRNOP00000083827.1;ENSRNOP00000095488.1	ENSRNOP00000028821.3 pep primary_assembly:mRatBN7.2:3:117622576:117644337:1 gene:ENSRNOG00000021222.6 transcript:ENSRNOT00000028821.5 gene_biotype:protein_coding transcript_biotype:protein_coding gene_symbol:Vps16 description:VPS16 core subunit of CORVET a	3	10	10	10	15.6	94.906	598390	619330	624740	614153	664950	668210	645340	659500	0.931241	0.0134979
ENSRNOP00000095994	chaperonin containing TCP1 subun	Cct2	ENSRNOP00000095994.1;ENSRNOP00000029234.4;ENSRNOP00000086312.1	ENSRNOP00000095994.1 pep primary_assembly:mRatBN7.2:7:52692725:52706944:-1 gene:ENSRNOG00000021317.6 transcript:ENSRNOT00000113939.1 gene_biotype:protein_coding transcript_biotype:protein_coding gene_symbol:Cct2 description:chaperonin containing TCP1 subun	3	33	33	33	70.9	58.568	13514000	13632000	13510000	13552000	14196000	14242000	13942000	1.41267e+07	0.95932	0.00479835
ENSRNOP00000030667	ubiquitin-like modifier activati	Uba6	ENSRNOP00000030667.4;ENSRNOP00000094765.1;ENSRNOP00000077997.1	ENSRNOP00000030667.4 pep primary_assembly:mRatBN7.2:14:21884039:21947857:1 gene:ENSRNOG00000021931.6 transcript:ENSRNOT00000037509.6 gene_biotype:protein_coding transcript_biotype:protein_coding gene_symbol:Uba6 description:ubiquitin-like modifier activati	3	18	18	18	24.7	117.93	1123800	1111500	1121700	1119000	1154500	1160700	1179700	1.16497e+06	0.960543	0.00561348
ENSRNOP00000032361	eukaryotic translation initia	Eif3d	ENSRNOP00000032361.2;ENSRNOP00000096030.1	ENSRNOP00000032361.2 pep primary_assembly:mRatBN7.2:7:109539356:109552206:-1 gene:ENSRNOG00000005804.7 transcript:ENSRNOT00000029753.4 gene_biotype:protein_coding transcript_biotype:protein_coding gene_symbol:Eif3d description:eukaryotic translation initia	2	11	11	11	35.8	63.988	1041000	1029700	1002700	1.02447e+06	991310	986450	992740	990167	1.03464	0.0408431
ENSRNOP00000032909	solute carrier family 25 mem	Slc25a12	ENSRNOP00000032909.7;ENSRNOP00000093623.1;ENSRNOP00000072270.2	ENSRNOP00000032909.7 pep primary_assembly:mRatBN7.2:3:56097269:56166424:-1 gene:ENSRNOG00000022922.7 transcript:ENSRNOT00000036728.7 gene_biotype:protein_coding transcript_biotype:protein_coding gene_symbol:Slc25a12 description:solute carrier family 25 mem	3	32	32	28	62.5	73.902	38222000	35674000	38550000	37482000	34820000	34094000	33770000	34228000	1.09507	0.0275848
ENSRNOP00000035440	myosin, heavy chain 9	Myh9	ENSRNOP00000035440.5;ENSRNOP00000007398.4;ENSRNOP00000089403.1;ENSRNOP00000092547.1;ENSRNOP00000088365.1	ENSRNOP00000035440.5 pep primary_assembly:mRatBN7.2:7:109343718:109424457:-1 gene:ENSRNOG00000049236.3 transcript:ENSRNOT00000037611.6 gene_biotype:protein_coding transcript_biotype:protein_coding gene_symbol:Myh9 description:myosin, heavy chain 9 [Source:	5	74	59	56	43	226.63	6580800	6451400	6711400	6581200	6850900	6804200	6921300	6858800	0.959526	0.0280838
ENSRNOP00000064015	immunoglobulin-like domain cont	Ildr2	ENSRNOP00000064015.3;ENSRNOP00000066529.3;ENSRNOP00000063419.3;ENSRNOP00000065769.3;ENSRNOP00000036628.5;ENSRNOP00000084258.1;ENSRNOP00000064707.3;ENSRNOP00000094889.1;ENSRNOP00000080698.1	ENSRNOP00000064015.3 pep primary_assembly:mRatBN7.2:13:78518816:78576924:1 gene:ENSRNOG00000025151.8 transcript:ENSRNOT00000073696.4 gene_biotype:protein_coding transcript_biotype:protein_coding gene_symbol:Ildr2 description:immunoglobulin-like domain cont	9	7	7	7	20.6	60.002	322920	317920	334390	325077	367210	393870	345000	368693	0.881699	0.0433059
ENSRNOP00000036740	synapsin III	Syn3	ENSRNOP00000036740.6	ENSRNOP00000036740.6 pep primary_assembly:mRatBN7.2:7:17376372:17808790:1 gene:ENSRNOG00000026866.7 transcript:ENSRNOT00000037918.6 gene_biotype:protein_coding transcript_biotype:protein_coding gene_symbol:Syn3 description:synapsin III [Source:RGD Symbol;A	1	16	14	14	37.5	63.348	1074900	1114100	1139100	1.10937e+06	1256900	1271200	1162800	1230300	0.901704	0.0356259
ENSRNOP00000038097	seizure related 6 homolog like	Sez6l	ENSRNOP00000038097.7;ENSRNOP00000085410.1;ENSRNOP00000078248.1	ENSRNOP00000038097.7 pep primary_assembly:mRatBN7.2:12:44064935:44219663:1 gene:ENSRNOG00000025612.7 transcript:ENSRNOT00000032193.7 gene_biotype:protein_coding transcript_biotype:protein_coding gene_symbol:Sez6l description:seizure related 6 homolog like	3	8	8	8	13	104.94	1343700	1278900	1237500	1286700	1533400	1460000	1419600	1471000	0.874711	0.0153974
ENSRNOP00000077399	sec1 family domain containing 1	Scfd1	ENSRNOP00000077399.1;ENSRNOP00000092379.1;ENSRNOP00000039132.1;ENSRNOP00000082071.1;ENSRNOP00000088329.1	ENSRNOP00000077399.1 pep primary_assembly:mRatBN7.2:6:68795896:68874078:1 gene:ENSRNOG00000031203.6 transcript:ENSRNOT00000108338.1 gene_biotype:protein_coding transcript_biotype:protein_coding gene_symbol:Scfd1 description:sec1 family domain containing 1	5	14	14	14	35.2	65.256	798000	786550	754280	779610	832060	875220	861280	856187	0.910561	0.013739
ENSRNOP00000042689	tubulin folding cofactor E	Tbce	ENSRNOP00000042689.3;ENSRNOP00000071747.1;ENSRNOP00000079636.1	ENSRNOP00000042689.3 pep primary_assembly:mRatBN7.2:17:51290202:51336088:1 gene:ENSRNOG00000029667.5 transcript:ENSRNOT00000040743.5 gene_biotype:protein_coding transcript_biotype:protein_coding gene_symbol:Tbce description:tubulin folding cofactor E [Sour	3	10	10	10	26.5	59.042	652300	656340	654440	654360	664820	696440	683710	681657	0.959955	0.0420517
ENSRNOP00000070912	heterogeneous nuclear ribonuc	Hnrnpu	ENSRNOP00000070912.1;ENSRNOP00000046783.3;ENSRNOP00000093222.1	ENSRNOP00000070912.1 pep primary_assembly:mRatBN7.2:13:90074181:90086586:-1 gene:ENSRNOG00000033790.5 transcript:ENSRNOT00000078061.2 gene_biotype:protein_coding transcript_biotype:protein_coding gene_symbol:Hnrnpu description:heterogeneous nuclear ribonuc	3	25	25	24	40.6	87.931	12619000	11832000	11939000	12130000	11053000	11510000	11140000	1.12343e+07	1.07973	0.0342005
ENSRNOP00000088606	RAS p21 protein activator 1	Rasa1	ENSRNOP00000088606.1;ENSRNOP00000092393.1;ENSRNOP00000047300.3	ENSRNOP00000088606.1 pep primary_assembly:mRatBN7.2:2:15857980:15940854:-1 gene:ENSRNOG00000029185.3 transcript:ENSRNOT00000095572.1 gene_biotype:protein_coding transcript_biotype:protein_coding gene_symbol:Rasa1 description:RAS p21 protein activator 1 [So	3	11	11	11	16.3	112.48	1025800	1003400	1037800	1.02233e+06	1142900	1295200	1185700	1.20793e+06	0.846349	0.0161947
ENSRNOP00000050012	ariadne RBR E3 ubiquitin prot	Arih2	ENSRNOP00000050012.3;ENSRNOP00000085248.1	ENSRNOP00000050012.3 pep primary_assembly:mRatBN7.2:8:109296738:109355852:-1 gene:ENSRNOG00000031827.5 transcript:ENSRNOT00000042577.5 gene_biotype:protein_coding transcript_biotype:protein_coding gene_symbol:Arih2 description:ariadne RBR E3 ubiquitin prot	2	4	4	4	14.8	57.74	62351	65780	61804	63311.7	72347	69652	66842	69613.7	0.909472	0.035448
ENSRNOP00000050555	kinesin light chain 2	Klc2	ENSRNOP00000050555.4;ENSRNOP00000077732.1	ENSRNOP00000050555.4 pep primary_assembly:mRatBN7.2:1:202414557:202424672:-1 gene:ENSRNOG00000020299.7 transcript:ENSRNOT00000041238.4 gene_biotype:protein_coding transcript_biotype:protein_coding gene_symbol:Klc2 description:kinesin light chain 2 [Source:	2	23	23	16	49.5	68.985	3044000	3171100	3098600	3.10457e+06	3406200	3230100	3474600	3370300	0.921154	0.0311857
ENSRNOP00000051326	mitochondrially encoded cytochrome c o	Mt-co3	ENSRNOP00000051326.3	ENSRNOP00000051326.3 pep primary_assembly:mRatBN7.2:MT:8599:9382:1 gene:ENSRNOG00000030700.3 transcript:ENSRNOT00000049683.3 gene_biotype:protein_coding transcript_biotype:protein_coding gene_symbol:Mt-co3 description:mitochondrially encoded cytochrome c o	1	1	1	1	5.4	29.87	1919200	1993700	1989800	1.96757e+06	2281100	2447300	2316900	2.34843e+06	0.837821	0.00244241
ENSRNOP00000057484	required for meiotic nuclear di	Rmnd1	ENSRNOP00000057484.3;ENSRNOP00000081149.1;ENSRNOP00000093918.1	ENSRNOP00000057484.3 pep primary_assembly:mRatBN7.2:1:40859829:40894314:-1 gene:ENSRNOG00000019501.8 transcript:ENSRNOT00000060757.5 gene_biotype:protein_coding transcript_biotype:protein_coding gene_symbol:Rmnd1 description:required for meiotic nuclear di	3	10	10	10	24.2	51.698	692830	688090	722740	701220	740000	738990	785670	754887	0.928908	0.046406
ENSRNOP00000097194	claudin 12	Cldn12	ENSRNOP00000097194.1;ENSRNOP00000096834.1;ENSRNOP00000084854.1;ENSRNOP00000057913.2	ENSRNOP00000097194.1 pep primary_assembly:mRatBN7.2:4:28522696:28533642:1 gene:ENSRNOG00000039862.3 transcript:ENSRNOT00000111546.1 gene_biotype:protein_coding transcript_biotype:protein_coding gene_symbol:Cldn12 description:claudin 12 [Source:RGD Symbol;A	4	1	1	1	6.1	27.02	115290	117920	114280	115830	133550	134670	133190	133803	0.865674	0.000105779
ENSRNOP00000058286	NADH:ubiquinone oxidoreductas	Ndufaf6	ENSRNOP00000058286.4	ENSRNOP00000058286.4 pep primary_assembly:mRatBN7.2:5:24147735:24171951:-1 gene:ENSRNOG00000040040.5 transcript:ENSRNOT00000061569.5 gene_biotype:protein_coding transcript_biotype:protein_coding gene_symbol:Ndufaf6 description:NADH:ubiquinone oxidoreductas	1	1	1	1	3.9	38.515	117620	116300	119340	117753	108940	93805	100030	100925	1.16674	0.0198274
ENSRNOP00000058432	cyclin G associated kinase	Gak	ENSRNOP00000058432.3;ENSRNOP00000081704.1;ENSRNOP00000081239.1;ENSRNOP00000000064.1	ENSRNOP00000058432.3 pep primary_assembly:mRatBN7.2:14:1089866:1216398:1 gene:ENSRNOG00000000048.6 transcript:ENSRNOT00000061720.4 gene_biotype:protein_coding transcript_biotype:protein_coding gene_symbol:Gak description:cyclin G associated kinase [Source:	4	19	18	18	18.9	142.51	1318500	1267200	1226700	1270800	1430600	1461300	1354200	1.41537e+06	0.897859	0.0252044
ENSRNOP00000060006	guanosine monophosphate reducta	Gmpr2	ENSRNOP00000060006.1;ENSRNOP00000070108.2	ENSRNOP00000060006.1 pep primary_assembly:mRatBN7.2:15:29165816:29174935:1 gene:ENSRNOG00000020216.8 transcript:ENSRNOT00000067150.4 gene_biotype:protein_coding transcript_biotype:protein_coding gene_symbol:Gmpr2 description:guanosine monophosphate reducta	2	3	3	3	17.8	31.184	273510	292750	256920	274393	225390	241890	238570	235283	1.16623	0.0273574
ENSRNOP00000061257	translational activator of cyto	Taco1	ENSRNOP00000061257.4	ENSRNOP00000061257.4 pep primary_assembly:mRatBN7.2:10:91002640:91012042:1 gene:ENSRNOG00000008405.8 transcript:ENSRNOT00000063973.4 gene_biotype:protein_coding transcript_biotype:protein_coding gene_symbol:Taco1 description:translational activator of cyto	1	6	6	6	33.2	32.754	488340	500850	483770	490987	540810	559870	507680	536120	0.915815	0.0484685
ENSRNOP00000061998	VPS11 core subunit of CORVET an	Vps11	ENSRNOP00000061998.2	ENSRNOP00000061998.2 pep primary_assembly:mRatBN7.2:8:44684127:44698568:-1 gene:ENSRNOG00000010733.7 transcript:ENSRNOT00000065456.2 gene_biotype:protein_coding transcript_biotype:protein_coding gene_symbol:Vps11 description:VPS11 core subunit of CORVET an	1	11	11	11	18.5	107.83	622540	634130	633880	630183	611030	582960	584630	592873	1.06293	0.019382
ENSRNOP00000070525	pyruvate dehydrogenase phosphata	Pdp1	ENSRNOP00000070525.2;ENSRNOP00000062054.3;ENSRNOP00000069844.2	ENSRNOP00000070525.2 pep primary_assembly:mRatBN7.2:5:25446272:25455217:-1 gene:ENSRNOG00000016180.6 transcript:ENSRNOT00000090376.2 gene_biotype:protein_coding transcript_biotype:protein_coding gene_symbol:Pdp1 description:pyruvate dehydrogenase phosphata	3	12	12	12	41.4	61.18	601460	650100	707630	653063	727640	778970	791550	766053	0.852504	0.0360218
ENSRNOP00000063689	histone deacetylase 6	Hdac6	ENSRNOP00000063689.3;ENSRNOP00000096671.1;ENSRNOP00000009295.6	ENSRNOP00000063689.3 pep primary_assembly:mRatBN7.2:X:14551044:14572441:1 gene:ENSRNOG00000048738.3 transcript:ENSRNOT00000064924.3 gene_biotype:protein_coding transcript_biotype:protein_coding gene_symbol:Hdac6 description:histone deacetylase 6 [Source:RG	3	11	11	11	11.3	129.43	1098600	1001600	1105800	1.06867e+06	1185500	1182900	1170800	1.17973e+06	0.905854	0.0306115
ENSRNOP00000075839	SH3 and multiple ankyrin repe	Shank2	ENSRNOP00000075839.1;ENSRNOP00000064763.3;ENSRNOP00000065891.2;ENSRNOP00000067841.3;ENSRNOP00000075800.2	ENSRNOP00000075839.1 pep primary_assembly:mRatBN7.2:1:199341853:199589394:1 gene:ENSRNOG00000050206.5 transcript:ENSRNOT00000092516.2 gene_biotype:protein_coding transcript_biotype:protein_coding gene_symbol:Shank2 description:SH3 and multiple ankyrin repe	5	26	25	3	31.6	158.31	2795100	2829900	2972000	2.86567e+06	3279300	3155600	3095600	3.17683e+06	0.902051	0.0152547
ENSRNOP00000064830	general transcription factor IIF	Gtf2f1	ENSRNOP00000064830.1	ENSRNOP00000064830.1 pep primary_assembly:mRatBN7.2:9:1843901:1853346:-1 gene:ENSRNOG00000047134.3 transcript:ENSRNOT00000073683.3 gene_biotype:protein_coding transcript_biotype:protein_coding gene_symbol:Gtf2f1 description:general transcription factor IIF	1	1	1	1	3.1	57.181	75484	81518	80219	79073.7	70477	71004	63397	68292.7	1.15786	0.0244353
ENSRNOP00000081936	ATPase phospholipid transport	Atp9a	ENSRNOP00000081936.1;ENSRNOP00000064988.3;ENSRNOP00000087584.1;ENSRNOP00000091936.1;ENSRNOP00000090350.1	ENSRNOP00000081936.1 pep primary_assembly:mRatBN7.2:3:157360359:157439633:-1 gene:ENSRNOG00000049484.4 transcript:ENSRNOT00000120273.1 gene_biotype:protein_coding transcript_biotype:protein_coding gene_symbol:Atp9a description:ATPase phospholipid transport	5	10	10	10	13.8	116.14	675970	675990	670910	674290	775630	789410	698280	754440	0.893762	0.0477736
ENSRNOP00000066274	SLIT and NTRK-like family, me	Slitrk5	ENSRNOP00000066274.1	ENSRNOP00000066274.1 pep primary_assembly:mRatBN7.2:15:88847535:88856836:1 gene:ENSRNOG00000009649.7 transcript:ENSRNOT00000012785.6 gene_biotype:protein_coding transcript_biotype:protein_coding gene_symbol:Slitrk5 description:SLIT and NTRK-like family, me	1	6	6	6	8.5	107.3	167560	169520	144270	160450	181770	183730	199970	188490	0.851239	0.0479442
ENSRNOP00000068507	heterochromatin protein 1, bi	Hp1bp3	ENSRNOP00000068507.2;ENSRNOP00000067949.2;ENSRNOP00000019696.6	ENSRNOP00000068507.2 pep primary_assembly:mRatBN7.2:5:150435814:150462989:1 gene:ENSRNOG00000014445.8 transcript:ENSRNOT00000076772.3 gene_biotype:protein_coding transcript_biotype:protein_coding gene_symbol:Hp1bp3 description:heterochromatin protein 1, bi	3	10	10	10	21.1	56.218	1491800	1450700	1412700	1.45173e+06	1336500	1263100	1284800	1294800	1.1212	0.00763224
ENSRNOP00000075275	casein kinase 2 beta	Csnk2b	ENSRNOP00000075275.2;ENSRNOP00000068429.2;ENSRNOP00000068454.2;ENSRNOP00000001123.4	ENSRNOP00000075275.2 pep primary_assembly:mRatBN7.2:20:3700991:3705016:1 gene:ENSRNOG00000000847.9 transcript:ENSRNOT00000092222.2 gene_biotype:protein_coding transcript_biotype:protein_coding gene_symbol:Csnk2b description:casein kinase 2 beta [Source:RGD	4	6	6	6	44.4	20.763	1732000	1763400	1730200	1.74187e+06	1986500	1980600	1834600	1933900	0.900702	0.0194767
ENSRNOP00000092229	histone cluster 1 H2B fami	Hist1h2bo	ENSRNOP00000092229.1;ENSRNOP00000091074.1;ENSRNOP00000083018.1;ENSRNOP00000078702.1;ENSRNOP00000069660.2;ENSRNOP00000081470.1;ENSRNOP00000089000.1;ENSRNOP00000094522.1;ENSRNOP00000087088.1;ENSRNOP00000068594.2;ENSRNOP00000070290.2;ENSRNOP00000084910.1;ENSRNOP00000022630.3	ENSRNOP00000092229.1 pep primary_assembly:mRatBN7.2:17:42716421:42718095:-1 gene:ENSRNOG00000070916.1 transcript:ENSRNOT00000097860.1 gene_biotype:protein_coding transcript_biotype:protein_coding gene_symbol:Hist1h2bo description:histone cluster 1 H2B fami	13	6	6	3	41.3	13.92	37730000	33872000	34369000	3.53237e+07	32259000	31322000	31083000	3.15547e+07	1.11944	0.0406392
ENSRNOP00000069105	talin 2	Tln2	ENSRNOP00000069105.2;ENSRNOP00000061714.4;ENSRNOP00000076906.1;ENSRNOP00000012026.6;ENSRNOP00000030866.6;ENSRNOP00000024885.7	ENSRNOP00000069105.2 pep primary_assembly:mRatBN7.2:8:67834326:68252219:-1 gene:ENSRNOG00000018373.9 transcript:ENSRNOT00000081450.2 gene_biotype:protein_coding transcript_biotype:protein_coding gene_symbol:Tln2 description:talin 2 [Source:RGD Symbol;Acc:1	6	68	68	62	43.8	273.54	8005800	8129800	8170200	8.10193e+06	8974300	8758700	8768500	8.83383e+06	0.917148	0.00104325
ENSRNOP00000070165	WD repeat domain 44	Wdr44	ENSRNOP00000070165.2;ENSRNOP00000074327.2;ENSRNOP00000047275.5;ENSRNOP00000091147.1	ENSRNOP00000070165.2 pep primary_assembly:mRatBN7.2:X:114482006:114586290:1 gene:ENSRNOG00000029068.5 transcript:ENSRNOT00000085185.2 gene_biotype:protein_coding transcript_biotype:protein_coding gene_symbol:Wdr44 description:WD repeat domain 44 [Source:RG	4	19	19	19	32.2	101.6	1259100	1196600	1252800	1.23617e+06	1506100	1381600	1433700	1.44047e+06	0.858171	0.0077161
ENSRNOP00000070959	high mobility group box	AABR07035218.1	ENSRNOP00000070959.2;ENSRNOP00000078668.1;ENSRNOP00000084450.1;ENSRNOP00000073890.1;ENSRNOP00000093631.1;ENSRNOP00000077050.1;ENSRNOP00000091741.1;ENSRNOP00000069851.1;ENSRNOP00000085056.1;ENSRNOP00000049627.5;ENSRNOP00000050465.5;ENSRNOP00000055435.3;ENSRNOP00000041486.4	ENSRNOP00000070959.2 pep primary_assembly:mRatBN7.2:12:5901586:5976095:1 gene:ENSRNOG00000029813.5 transcript:ENSRNOT00000089476.2 gene_biotype:protein_coding transcript_biotype:protein_coding gene_symbol:AABR07035218.1 description:high mobility group box	13	9	9	5	41.8	19.537	5621500	5076100	4920300	5.20597e+06	4626000	4524600	4591700	4.58077e+06	1.13648	0.0435651
ENSRNOP00000091098	myotubularin related protein 7	Mtmr7	ENSRNOP00000091098.1;ENSRNOP00000088279.1;ENSRNOP00000071921.2;ENSRNOP00000059684.1	ENSRNOP00000091098.1 pep primary_assembly:mRatBN7.2:16:51641190:51732182:1 gene:ENSRNOG00000011420.8 transcript:ENSRNOT00000105685.1 gene_biotype:protein_coding transcript_biotype:protein_coding gene_symbol:Mtmr7 description:myotubularin related protein 7	4	8	8	8	17.3	75.835	296580	313440	292930	300983	340110	339520	315530	331720	0.907342	0.0402173
ENSRNOP00000072024	bassoon (presynaptic cytomatrix	Bsn	ENSRNOP00000072024.2	ENSRNOP00000072024.2 pep primary_assembly:mRatBN7.2:8:108788542:108875819:-1 gene:ENSRNOG00000030714.6 transcript:ENSRNOT00000082113.2 gene_biotype:protein_coding transcript_biotype:protein_coding gene_symbol:Bsn description:bassoon (presynaptic cytomatrix	1	143	143	139	56.4	418.02	42046000	41814000	40571000	41477000	46395000	45239000	43629000	4.50877e+07	0.919919	0.0174017
ENSRNOP00000074421	secretory carrier membrane pro	Scamp5	ENSRNOP00000074421.2;ENSRNOP00000072922.1	ENSRNOP00000074421.2 pep primary_assembly:mRatBN7.2:8:57846659:57854506:-1 gene:ENSRNOG00000054008.2 transcript:ENSRNOT00000089602.2 gene_biotype:protein_coding transcript_biotype:protein_coding gene_symbol:Scamp5 description:secretory carrier membrane pro	2	4	4	4	35.9	25.939	10898000	12054000	11371000	11441000	12479000	12933000	13623000	1.30117e+07	0.879288	0.0292521
ENSRNOP00000081381	archain 1	Arcn1	ENSRNOP00000081381.1;ENSRNOP00000076974.1;ENSRNOP00000072654.2	ENSRNOP00000081381.1 pep primary_assembly:mRatBN7.2:8:45057619:45073880:-1 gene:ENSRNOG00000061108.2 transcript:ENSRNOT00000110390.1 gene_biotype:protein_coding transcript_biotype:protein_coding gene_symbol:Arcn1 description:archain 1 [Source:RGD Symbol;Ac	3	16	16	16	36.1	56.421	1690800	1677800	1743500	1.70403e+06	1835000	1893600	1774500	1.83437e+06	0.928949	0.0307012
ENSRNOP00000078627	sodium voltage-gated channel bet	Scn2b	ENSRNOP00000078627.1	ENSRNOP00000078627.1 pep primary_assembly:mRatBN7.2:8:45425629:45437765:1 gene:ENSRNOG00000063505.1 transcript:ENSRNOT00000106113.1 gene_biotype:protein_coding transcript_biotype:protein_coding gene_symbol:Scn2b description:sodium voltage-gated channel bet	1	6	6	6	37.2	24.144	2928500	2746200	2793900	2.82287e+06	2588700	2605000	2554100	2582600	1.09303	0.0132167
ENSRNOP00000079284	proteasome 26S subunit, ATPase	Psmc5	ENSRNOP00000079284.1;ENSRNOP00000013997.4;ENSRNOP00000090060.1	ENSRNOP00000079284.1 pep primary_assembly:mRatBN7.2:10:91187773:91196129:1 gene:ENSRNOG00000010038.7 transcript:ENSRNOT00000118001.1 gene_biotype:protein_coding transcript_biotype:protein_coding gene_symbol:Psmc5 description:proteasome 26S subunit, ATPase	3	24	24	24	61.8	45.626	3385600	3455300	3373500	3404800	3625900	3817500	3670000	3.70447e+06	0.919107	0.00907313
ENSRNOP00000095669	V-type proton ATPase subunit F pseudogene		ENSRNOP00000095669.1;ENSRNOP00000087900.1;ENSRNOP00000083175.1;ENSRNOP00000079566.1	ENSRNOP00000095669.1 pep primary_assembly:mRatBN7.2:15:24317364:24330117:1 gene:ENSRNOG00000064609.1 transcript:ENSRNOT00000111856.1 gene_biotype:protein_coding transcript_biotype:protein_coding description:V-type proton ATPase subunit F pseudogene [Source	4	5	5	5	11.4	22.501	2145100	2404100	2250500	2.26657e+06	2490000	2477100	2489700	2485600	0.911879	0.0437594
ENSRNOP00000079700			ENSRNOP00000079700.1	ENSRNOP00000079700.1 pep primary_assembly:mRatBN7.2:15:33274509:33275597:-1 gene:ENSRNOG00000064315.1 transcript:ENSRNOT00000112115.1 gene_biotype:protein_coding transcript_biotype:protein_coding	1	3	1	1	16.6	28.028	240340	229360	263710	244470	211930	201200	211440	208190	1.17426	0.0276398
ENSRNOP00000080561	Rho GDP dissociation inhib	Arhgdia	ENSRNOP00000080561.1;ENSRNOP00000051840.2	ENSRNOP00000080561.1 pep primary_assembly:mRatBN7.2:10:105854533:105857651:-1 gene:ENSRNOG00000036688.3 transcript:ENSRNOT00000114464.1 gene_biotype:protein_coding transcript_biotype:protein_coding gene_symbol:Arhgdia description:Rho GDP dissociation inhib	2	12	12	12	71.6	23.407	24790000	24962000	24565000	2.47723e+07	21939000	22575000	20572000	2.16953e+07	1.14183	0.00692743
ENSRNOP00000080642	GNAS complex locus	Gnas	ENSRNOP00000080642.1;ENSRNOP00000088089.1;ENSRNOP00000091559.1;ENSRNOP00000094944.1;ENSRNOP00000086723.1;ENSRNOP00000069800.2	ENSRNOP00000080642.1 pep primary_assembly:mRatBN7.2:3:163119163:163136316:1 gene:ENSRNOG00000047374.3 transcript:ENSRNOT00000111199.1 gene_biotype:protein_coding transcript_biotype:protein_coding gene_symbol:Gnas description:GNAS complex locus [Source:RGD	6	16	15	12	47.2	45.663	4881400	4802200	5034000	4.90587e+06	4632000	4371400	4344600	4.44933e+06	1.10261	0.0161352
ENSRNOP00000082424	potassium calcium-activated channe	Kcnma1	ENSRNOP00000082424.1;ENSRNOP00000074702.2;ENSRNOP00000090930.1;ENSRNOP00000061684.3;ENSRNOP00000058962.4;ENSRNOP00000086150.1;ENSRNOP00000096569.1;ENSRNOP00000071652.2	ENSRNOP00000082424.1 pep primary_assembly:mRatBN7.2:15:302214:991893:1 gene:ENSRNOG00000005985.9 transcript:ENSRNOT00000109865.1 gene_biotype:protein_coding transcript_biotype:protein_coding gene_symbol:Kcnma1 description:potassium calcium-activated channe	8	17	17	17	18.3	132.22	1777500	1773700	1695900	1.74903e+06	2079900	1983800	1831600	1965100	0.890048	0.048548
ENSRNOP00000086528	SLIT-ROBO Rho GTPase activat	Srgap3	ENSRNOP00000086528.1;ENSRNOP00000089134.1;ENSRNOP00000009066.5	ENSRNOP00000086528.1 pep primary_assembly:mRatBN7.2:4:145840078:146070575:-1 gene:ENSRNOG00000006509.8 transcript:ENSRNOT00000108871.1 gene_biotype:protein_coding transcript_biotype:protein_coding gene_symbol:Srgap3 description:SLIT-ROBO Rho GTPase activat	3	29	29	25	37.1	121.72	4380300	4777000	4520500	4.55927e+06	4859300	4989400	5014200	4954300	0.920265	0.0347483
ENSRNOP00000088101	tescalcin	Tesc	ENSRNOP00000088101.1	ENSRNOP00000088101.1 pep primary_assembly:mRatBN7.2:12:38523303:38555824:-1 gene:ENSRNOG00000001128.7 transcript:ENSRNOT00000114089.1 gene_biotype:protein_coding transcript_biotype:protein_coding gene_symbol:Tesc description:tescalcin [Source:RGD Symbol;Ac	1	5	5	1	26.3	23.277	530050	519140	606910	552033	631750	664150	657280	651060	0.847899	0.0278649
ENSRNOP00000090918	SRC kinase signaling inhibito	Srcin1	ENSRNOP00000090918.1;ENSRNOP00000095793.1;ENSRNOP00000016070.5;ENSRNOP00000080321.1	ENSRNOP00000090918.1 pep primary_assembly:mRatBN7.2:10:82504393:82570112:-1 gene:ENSRNOG00000011475.7 transcript:ENSRNOT00000095707.1 gene_biotype:protein_coding transcript_biotype:protein_coding gene_symbol:Srcin1 description:SRC kinase signaling inhibito	4	50	50	7	55	131.82	14622000	15111000	16119000	15284000	16765000	16932000	16291000	1.66627e+07	0.91726	0.0455638
ENSRNOP00000091106			ENSRNOP00000091106.1	ENSRNOP00000091106.1 pep primary_assembly:mRatBN7.2:7:131073137:131099397:-1 gene:ENSRNOG00000065389.1 transcript:ENSRNOT00000099880.1 gene_biotype:protein_coding transcript_biotype:protein_coding	1	1	1	1	1.3	141.37	1768100	1936900	2063600	1.92287e+06	2243400	2183600	2304200	2.24373e+06	0.856994	0.0255246
ENSRNOP00000091362	ADP-ribosylation factor like G	Arl8b	ENSRNOP00000091362.1;ENSRNOP00000071470.2;ENSRNOP00000082350.1	ENSRNOP00000091362.1 pep primary_assembly:mRatBN7.2:4:141748680:141792593:1 gene:ENSRNOG00000055860.2 transcript:ENSRNOT00000100067.1 gene_biotype:protein_coding transcript_biotype:protein_coding gene_symbol:Arl8b description:ADP-ribosylation factor like G	3	9	3	3	45.7	21.539	1272200	1340100	1294200	1.30217e+06	1432200	1439700	1389300	1420400	0.916761	0.00966275
ENSRNOP00000094561	tubulin, alpha 1B	Tuba1b	ENSRNOP00000094561.1;ENSRNOP00000097331.1;ENSRNOP00000049998.1;ENSRNOP00000039152.2;ENSRNOP00000086703.1;ENSRNOP00000087234.1	ENSRNOP00000094561.1 pep primary_assembly:mRatBN7.2:7:130081032:130116326:-1 gene:ENSRNOG00000053468.2 transcript:ENSRNOT00000107560.1 gene_biotype:protein_coding transcript_biotype:protein_coding gene_symbol:Tuba1b description:tubulin, alpha 1B [Source:RG	6	41	41	1	87.8	50.004	807140000	796890000	827850000	8.10627e+08	742460000	716820000	779210000	7.46163e+08	1.08639	0.0335088
ENSRNOP00000094937	NADH dehydrogenase (ubiquinone) Fe-S protein 6		ENSRNOP00000094937.1	ENSRNOP00000094937.1 pep primary_assembly:mRatBN7.2:1:29968866:29977413:1 gene:ENSRNOG00000062531.1 transcript:ENSRNOT00000118645.1 gene_biotype:protein_coding transcript_biotype:protein_coding description:NADH dehydrogenase (ubiquinone) Fe-S protein 6 [So	1	6	6	3	55.1	11.02	4290000	4189000	4149200	4209400	4473300	4409400	4366000	4.41623e+06	0.953165	0.0166692
ENSRNOP00000097378	dihydropyrimidinase-like 2	Dpysl2	ENSRNOP00000097378.1;ENSRNOP00000012996.4;ENSRNOP00000088353.1	ENSRNOP00000097378.1 pep primary_assembly:mRatBN7.2:15:41005551:41111829:-1 gene:ENSRNOG00000009625.7 transcript:ENSRNOT00000111164.1 gene_biotype:protein_coding transcript_biotype:protein_coding gene_symbol:Dpysl2 description:dihydropyrimidinase-like 2 [S	3	40	40	36	71.3	73.16	344310000	344860000	343330000	3.44167e+08	327940000	320890000	315840000	3.21557e+08	1.07031	0.00307521
ENSRNOP00000000008	glutamate decarboxylase 1	Gad1	ENSRNOP00000000008.2;ENSRNOP00000074220.2;ENSRNOP00000068833.1	ENSRNOP00000000008.2 pep primary_assembly:mRatBN7.2:3:55369704:55410333:1 gene:ENSRNOG00000000007.8 transcript:ENSRNOT00000000008.5 gene_biotype:protein_coding transcript_biotype:protein_coding gene_symbol:Gad1 description:glutamate decarboxylase 1 [Source	3	16	15	15	38.6	66.64	1606600	1735200	2713400	2018400	2455700	3005800	2381500	2.61433e+06	0.772052	0.21156
ENSRNOP00000000036	transmembrane and coiled-coil	Tmcc2	ENSRNOP00000000036.3;ENSRNOP00000082636.1;ENSRNOP00000084820.1	ENSRNOP00000000036.3 pep primary_assembly:mRatBN7.2:13:43794029:43831716:-1 gene:ENSRNOG00000000033.6 transcript:ENSRNOT00000000036.6 gene_biotype:protein_coding transcript_biotype:protein_coding gene_symbol:Tmcc2 description:transmembrane and coiled-coil	3	7	7	7	15.7	77.142	451940	455040	382120	429700	400410	365970	393800	386727	1.11112	0.174239
ENSRNOP00000000052	Cd82 molecule	Cd82	ENSRNOP00000000052.5;ENSRNOP00000084636.1;ENSRNOP00000078723.1;ENSRNOP00000091451.1	ENSRNOP00000000052.5 pep primary_assembly:mRatBN7.2:3:79387361:79431782:-1 gene:ENSRNOG00000000047.5 transcript:ENSRNOT00000000052.5 gene_biotype:protein_coding transcript_biotype:protein_coding gene_symbol:Cd82 description:Cd82 molecule [Source:RGD Symbol	4	2	2	2	8	29.175	163900	299550	676130	379860	234450	138870	769320	380880	0.997322	0.996927
ENSRNOP00000000058			ENSRNOP00000000058.4;ENSRNOP00000074751.2	ENSRNOP00000000058.4 pep primary_assembly:mRatBN7.2:13:85124977:85163634:1 gene:ENSRNOG00000000053.8 transcript:ENSRNOT00000000058.7 gene_biotype:protein_coding transcript_biotype:protein_coding;ENSRNOP00000074751.2 pep primary_assembly:mRatBN7.2:13:851353	2	2	2	2	17.1	27.817	305400	380400	400770	362190	270250	302460	105730	226147	1.60157	0.113975
ENSRNOP00000000072	ATP synthase membrane subunit e	Atp5me	ENSRNOP00000000072.3	ENSRNOP00000000072.3 pep primary_assembly:mRatBN7.2:14:1319868:1321013:1 gene:ENSRNOG00000000064.5 transcript:ENSRNOT00000000072.3 gene_biotype:protein_coding transcript_biotype:protein_coding gene_symbol:Atp5me description:ATP synthase membrane subunit e	1	2	2	2	31.6	4.247	7158000	5631400	7462700	6750700	5206000	3964600	7746300	5.63897e+06	1.19715	0.423653
ENSRNOP00000000078	protein phosphatase 2, reg	Ppp2r5a	ENSRNOP00000000078.4;ENSRNOP00000089062.1	ENSRNOP00000000078.4 pep primary_assembly:mRatBN7.2:13:102931264:102975661:-1 gene:ENSRNOG00000000068.6 transcript:ENSRNOT00000000078.6 gene_biotype:protein_coding transcript_biotype:protein_coding gene_symbol:Ppp2r5a description:protein phosphatase 2, reg	2	8	8	8	23.7	56.336	578160	495090	530370	534540	596790	538910	516710	550803	0.970473	0.656456
ENSRNOP00000000080	down-regulator of transcription 1	Dr1	ENSRNOP00000000080.5	ENSRNOP00000000080.5 pep primary_assembly:mRatBN7.2:14:1458223:1469638:-1 gene:ENSRNOG00000000070.6 transcript:ENSRNOT00000000080.6 gene_biotype:protein_coding transcript_biotype:protein_coding gene_symbol:Dr1 description:down-regulator of transcription 1	1	2	2	2	21.3	19.245	75103	62536	71791	69810	38104	72446	67136	59228.7	1.17865	0.40269
ENSRNOP00000000110	ring finger protein 115	Rnf115	ENSRNOP00000000110.5	ENSRNOP00000000110.5 pep primary_assembly:mRatBN7.2:2:184262371:184329823:1 gene:ENSRNOG00000000098.8 transcript:ENSRNOT00000000110.7 gene_biotype:protein_coding transcript_biotype:protein_coding gene_symbol:Rnf115 description:ring finger protein 115 [Sour	1	1	1	1	5.9	33.873	26635	23541	21721	23965.7	26830	29894	15716	24146.7	0.992504	0.970107
ENSRNOP00000078440	aspartylglucosaminidase	Aga	ENSRNOP00000078440.1;ENSRNOP00000000120.3;ENSRNOP00000093756.1	ENSRNOP00000078440.1 pep primary_assembly:mRatBN7.2:16:38504663:38516606:-1 gene:ENSRNOG00000000108.4 transcript:ENSRNOT00000116014.1 gene_biotype:protein_coding transcript_biotype:protein_coding gene_symbol:Aga description:aspartylglucosaminidase [Source:	3	3	3	3	15.6	33.831	79910	95788	56758	77485.3	56638	77732	67025	67131.7	1.15423	0.466038
ENSRNOP00000000134	adenylate kinase 2	Ak2	ENSRNOP00000000134.2;ENSRNOP00000095127.1;ENSRNOP00000080641.1	ENSRNOP00000000134.2 pep primary_assembly:mRatBN7.2:5:141346063:141364632:1 gene:ENSRNOG00000000122.5 transcript:ENSRNOT00000000134.5 gene_biotype:protein_coding transcript_biotype:protein_coding gene_symbol:Ak2 description:adenylate kinase 2 [Source:RGD S	3	6	6	6	34.5	25.529	423390	431740	357100	404077	382650	375890	320590	359710	1.12334	0.222213
ENSRNOP00000000142	DnaJ heat shock protein family	Dnajb5	ENSRNOP00000000142.4;ENSRNOP00000075003.1	ENSRNOP00000000142.4 pep primary_assembly:mRatBN7.2:5:57176845:57185483:1 gene:ENSRNOG00000000130.8 transcript:ENSRNOT00000000142.8 gene_biotype:protein_coding transcript_biotype:protein_coding gene_symbol:Dnajb5 description:DnaJ heat shock protein family	2	6	6	6	21.7	43.032	545040	462610	326520	444723	482300	315710	390240	396083	1.1228	0.575458
ENSRNOP00000000163	low density lipoprotein rec	Ldlrap1	ENSRNOP00000000163.6	ENSRNOP00000000163.6 pep primary_assembly:mRatBN7.2:5:146955607:146978601:-1 gene:ENSRNOG00000000151.8 transcript:ENSRNOT00000000163.8 gene_biotype:protein_coding transcript_biotype:protein_coding gene_symbol:Ldlrap1 description:low density lipoprotein rec	1	1	1	1	5.2	33.9	31097	31894	16993	26661.3	26456	29713	28973	28380.7	0.939419	0.745304
ENSRNOP00000091929	CHM Rab escort protein	Chm	ENSRNOP00000091929.1;ENSRNOP00000090179.1;ENSRNOP00000078117.1;ENSRNOP00000000174.7;ENSRNOP00000075357.2	ENSRNOP00000091929.1 pep primary_assembly:mRatBN7.2:X:78203204:78305955:-1 gene:ENSRNOG00000000161.8 transcript:ENSRNOT00000110841.1 gene_biotype:protein_coding transcript_biotype:protein_coding gene_symbol:Chm description:CHM Rab escort protein [Source:RG	5	3	3	3	9.5	67.281	328700	249430	306140	294757	171540	167970	382830	240780	1.22417	0.510695
ENSRNOP00000091718			ENSRNOP00000091718.1;ENSRNOP00000090428.1;ENSRNOP00000088297.1;ENSRNOP00000092012.1;ENSRNOP00000095159.1;ENSRNOP00000000177.3;ENSRNOP00000092818.1	ENSRNOP00000091718.1 pep primary_assembly:mRatBN7.2:X:117057606:117222087:-1 gene:ENSRNOG00000000164.5 transcript:ENSRNOT00000115842.1 gene_biotype:protein_coding transcript_biotype:protein_coding;ENSRNOP00000090428.1 pep primary_assembly:mRatBN7.2:X:11709	7	2	2	2	5	41.452	140090	71502	205660	139084	104760	129480	89426	107889	1.28914	0.483619
ENSRNOP00000000181	glycine amidinotransferase	Gatm	ENSRNOP00000000181.4	ENSRNOP00000000181.4 pep primary_assembly:mRatBN7.2:3:109658951:109684129:-1 gene:ENSRNOG00000000168.5 transcript:ENSRNOT00000000181.5 gene_biotype:protein_coding transcript_biotype:protein_coding gene_symbol:Gatm description:glycine amidinotransferase [So	1	6	6	6	20.1	52.143	448060	366060	423800	412640	416490	427610	372630	405577	1.01742	0.822824
ENSRNOP00000000201	mercaptopyruvate sulfurtransfer	Mpst	ENSRNOP00000000201.2	ENSRNOP00000000201.2 pep primary_assembly:mRatBN7.2:7:109955675:109963141:1 gene:ENSRNOG00000000185.6 transcript:ENSRNOT00000000201.6 gene_biotype:protein_coding transcript_biotype:protein_coding gene_symbol:Mpst description:mercaptopyruvate sulfurtransfer	1	6	6	6	30	32.94	726690	858090	856510	813763	885470	839770	845150	856797	0.949774	0.401232
ENSRNOP00000089456	von Willebrand factor A domain c	Vwa5a	ENSRNOP00000089456.1;ENSRNOP00000015986.8;ENSRNOP00000000211.6	ENSRNOP00000089456.1 pep primary_assembly:mRatBN7.2:8:38815210:38839112:1 gene:ENSRNOG00000000195.8 transcript:ENSRNOT00000095314.1 gene_biotype:protein_coding transcript_biotype:protein_coding gene_symbol:Vwa5a description:von Willebrand factor A domain c	3	3	3	3	6.1	85.388	67021	51792	36306	51706.3	43779	63203	25711	44231	1.16901	0.621503
ENSRNOP00000000254	similar to Protein Njmu-R	RGD1310429	ENSRNOP00000000254.6;ENSRNOP00000086674.1	ENSRNOP00000000254.6 pep primary_assembly:mRatBN7.2:10:65360924:65373864:-1 gene:ENSRNOG00000000237.8 transcript:ENSRNOT00000000254.8 gene_biotype:protein_coding transcript_biotype:protein_coding gene_symbol:RGD1310429 description:similar to Protein Njmu-R	2	6	6	6	24.7	44.43	502630	483690	368230	451517	566500	545790	460040	524110	0.861492	0.24383
ENSRNOP00000000263	archaelysin family metallopeptid	Amz2	ENSRNOP00000000263.6;ENSRNOP00000094228.1	ENSRNOP00000000263.6 pep primary_assembly:mRatBN7.2:10:94401579:94412114:1 gene:ENSRNOG00000000246.7 transcript:ENSRNOT00000000263.7 gene_biotype:protein_coding transcript_biotype:protein_coding gene_symbol:Amz2 description:archaelysin family metallopeptid	2	4	4	4	19.8	41.822	227760	218070	331130	258987	227680	246600	210840	228373	1.13405	0.461513
ENSRNOP00000000304	reticulon 4 interacting prote	Rtn4ip1	ENSRNOP00000000304.5	ENSRNOP00000000304.5 pep primary_assembly:mRatBN7.2:20:47382234:47422338:1 gene:ENSRNOG00000000279.8 transcript:ENSRNOT00000000304.8 gene_biotype:protein_coding transcript_biotype:protein_coding gene_symbol:Rtn4ip1 description:reticulon 4 interacting prote	1	9	9	9	28	43.605	923960	706590	1122900	917817	862150	885480	1176800	974810	0.941534	0.735211
ENSRNOP00000000336	sphingomyelin phosphodiesteras	Smpd2	ENSRNOP00000000336.3;ENSRNOP00000093225.1	ENSRNOP00000000336.3 pep primary_assembly:mRatBN7.2:20:44986234:44989441:-1 gene:ENSRNOG00000000306.6 transcript:ENSRNOT00000000336.6 gene_biotype:protein_coding transcript_biotype:protein_coding gene_symbol:Smpd2 description:sphingomyelin phosphodiesteras	2	5	5	5	16.8	47.644	416980	526480	290700	411387	481260	380530	353030	404940	1.01592	0.938481
ENSRNOP00000000337	microtubule associated monooxy	Mical1	ENSRNOP00000000337.4	ENSRNOP00000000337.4 pep primary_assembly:mRatBN7.2:20:44974138:44986089:1 gene:ENSRNOG00000000307.7 transcript:ENSRNOT00000000337.5 gene_biotype:protein_coding transcript_biotype:protein_coding gene_symbol:Mical1 description:microtubule associated monooxy	1	7	7	7	10.9	116.67	107390	244410	74533	142111	321830	201620	156650	226700	0.626868	0.303316
ENSRNOP00000000365	HECT domain and ankyrin repeat	Hace1	ENSRNOP00000000365.4;ENSRNOP00000090381.1;ENSRNOP00000085147.1	ENSRNOP00000000365.4 pep primary_assembly:mRatBN7.2:20:49035648:49151103:1 gene:ENSRNOG00000000327.6 transcript:ENSRNOT00000000365.5 gene_biotype:protein_coding transcript_biotype:protein_coding gene_symbol:Hace1 description:HECT domain and ankyrin repeat	3	11	11	11	15.6	102.16	826010	871880	547970	748620	686010	642590	819130	715910	1.04569	0.788926
ENSRNOP00000000383	nidogen 2	Nid2	ENSRNOP00000000383.7;ENSRNOP00000072586.2	ENSRNOP00000000383.7 pep primary_assembly:mRatBN7.2:15:4458084:4513843:-1 gene:ENSRNOG00000000341.8 transcript:ENSRNOT00000000383.8 gene_biotype:protein_coding transcript_biotype:protein_coding gene_symbol:Nid2 description:nidogen 2 [Source:RGD Symbol;Acc:	2	3	3	3	3.9	152.97	143020	156560	108490	136023	175080	167750	127650	156827	0.867348	0.368536
ENSRNOP00000093655	phenazine biosynthesis-like pr	Pbld1	ENSRNOP00000093655.1;ENSRNOP00000000434.4	ENSRNOP00000093655.1 pep primary_assembly:mRatBN7.2:20:25552392:25565614:-1 gene:ENSRNOG00000000386.7 transcript:ENSRNOT00000116726.1 gene_biotype:protein_coding transcript_biotype:protein_coding gene_symbol:Pbld1 description:phenazine biosynthesis-like pr	2	3	3	3	20.4	29.623	174230	181600	85274	147035	111560	52624	84159	82781	1.77619	0.143079
ENSRNOP00000000444	kinesin family binding protein	Kifbp	ENSRNOP00000000444.5;ENSRNOP00000082090.1	ENSRNOP00000000444.5 pep primary_assembly:mRatBN7.2:20:30512901:30532467:-1 gene:ENSRNOG00000000395.8 transcript:ENSRNOT00000000444.8 gene_biotype:protein_coding transcript_biotype:protein_coding gene_symbol:Kifbp description:kinesin family binding protein	2	9	9	9	21.7	71.28	592890	617990	517110	575997	694200	544180	586590	608323	0.946859	0.581476
ENSRNOP00000000474	nuclear mitotic apparatus prot	Numa1	ENSRNOP00000000474.6;ENSRNOP00000052124.4;ENSRNOP00000094619.1	ENSRNOP00000000474.6 pep primary_assembly:mRatBN7.2:1:156326259:156372855:1 gene:ENSRNOG00000000417.8 transcript:ENSRNOT00000000474.7 gene_biotype:protein_coding transcript_biotype:protein_coding gene_symbol:Numa1 description:nuclear mitotic apparatus prot	3	12	12	12	8.2	236.74	272270	243520	208940	241577	239270	220100	194900	218090	1.10769	0.352924
ENSRNOP00000000481	Ski2 like RNA helicase	Skiv2l	ENSRNOP00000000481.5	ENSRNOP00000000481.5 pep primary_assembly:mRatBN7.2:20:3982627:3993261:1 gene:ENSRNOG00000000421.5 transcript:ENSRNOT00000000481.5 gene_biotype:protein_coding transcript_biotype:protein_coding gene_symbol:Skiv2l description:Ski2 like RNA helicase [Source:R	1	12	1	1	18.1	137.18	40171	57325	38535	45343.7	65130	41219	49977	52108.7	0.870175	0.503524
ENSRNOP00000000495	proline-rich transmembrane prote	Prrt1	ENSRNOP00000000495.4;ENSRNOP00000085419.1	ENSRNOP00000000495.4 pep primary_assembly:mRatBN7.2:20:4117957:4121600:-1 gene:ENSRNOG00000000433.7 transcript:ENSRNOT00000000495.7 gene_biotype:protein_coding transcript_biotype:protein_coding gene_symbol:Prrt1 description:proline-rich transmembrane prote	2	4	4	4	22.9	31.389	2007300	1776100	1263300	1.68223e+06	1806600	1228200	1512400	1.51573e+06	1.10985	0.578959
ENSRNOP00000000500	1-acylglycerol-3-phosphate O-ac	Agpat1	ENSRNOP00000000500.5	ENSRNOP00000000500.5 pep primary_assembly:mRatBN7.2:20:4135957:4145278:-1 gene:ENSRNOG00000000437.8 transcript:ENSRNOT00000000500.8 gene_biotype:protein_coding transcript_biotype:protein_coding gene_symbol:Agpat1 description:1-acylglycerol-3-phosphate O-ac	1	3	3	3	13.7	36.012	545580	655480	925930	708997	770920	429070	508690	569560	1.24481	0.413913
ENSRNOP00000000528	proteasome 20S subunit beta 8	Psmb8	ENSRNOP00000000528.4	ENSRNOP00000000528.4 pep primary_assembly:mRatBN7.2:20:4652159:4655283:-1 gene:ENSRNOG00000000456.7 transcript:ENSRNOT00000000528.7 gene_biotype:protein_coding transcript_biotype:protein_coding gene_symbol:Psmb8 description:proteasome 20S subunit beta 8 [S	1	2	2	2	10.2	29.176	67423	67248	28527	54399.3	55354	30088	52633	46025	1.18195	0.61131
ENSRNOP00000000541	solute carrier family 39 member	Slc39a7	ENSRNOP00000000541.4	ENSRNOP00000000541.4 pep primary_assembly:mRatBN7.2:20:4822012:4826537:1 gene:ENSRNOG00000000465.8 transcript:ENSRNOT00000000541.7 gene_biotype:protein_coding transcript_biotype:protein_coding gene_symbol:Slc39a7 description:solute carrier family 39 member	1	2	2	2	3.5	58.088	242390	241910	223030	235777	213990	233050	208360	218467	1.07923	0.152756
ENSRNOP00000080803	VPS52 subunit of GARP complex	Vps52	ENSRNOP00000080803.1;ENSRNOP00000087040.1;ENSRNOP00000000549.3	ENSRNOP00000080803.1 pep primary_assembly:mRatBN7.2:20:4860843:4931462:-1 gene:ENSRNOG00000000470.8 transcript:ENSRNOT00000107087.1 gene_biotype:protein_coding transcript_biotype:protein_coding gene_symbol:Vps52 description:VPS52 subunit of GARP complex [S	3	13	13	13	27.6	81.208	1247100	1241800	1122200	1203700	1077700	1280200	1191800	1.18323e+06	1.0173	0.788626
ENSRNOP00000000553	prefoldin subunit 6	Pfdn6	ENSRNOP00000000553.2;ENSRNOP00000090507.1	ENSRNOP00000000553.2 pep primary_assembly:mRatBN7.2:20:4945959:4947433:1 gene:ENSRNOG00000000473.7 transcript:ENSRNOT00000000553.7 gene_biotype:protein_coding transcript_biotype:protein_coding gene_symbol:Pfdn6 description:prefoldin subunit 6 [Source:RGD S	2	9	9	9	46.5	14.497	997760	1116800	1334600	1149720	903110	1130800	790350	941420	1.22126	0.212439
ENSRNOP00000065219	cutA divalent cation tolerance ho	Cuta	ENSRNOP00000065219.1;ENSRNOP00000000568.2	ENSRNOP00000065219.1 pep primary_assembly:mRatBN7.2:20:5022959:5024552:-1 gene:ENSRNOG00000000481.9 transcript:ENSRNOT00000072319.4 gene_biotype:protein_coding transcript_biotype:protein_coding gene_symbol:Cuta description:cutA divalent cation tolerance ho	2	2	2	2	33.8	16.413	1132200	1637700	1496400	1422100	1333300	1100300	3180200	1.87127e+06	0.759967	0.542139
ENSRNOP00000000599	aryl-hydrocarbon receptor-inter	Aip	ENSRNOP00000000599.6;ENSRNOP00000075162.1	ENSRNOP00000000599.6 pep primary_assembly:mRatBN7.2:1:201407288:201411787:-1 gene:ENSRNOG00000022289.7 transcript:ENSRNOT00000000599.8 gene_biotype:protein_coding transcript_biotype:protein_coding gene_symbol:Aip description:aryl-hydrocarbon receptor-inter	2	6	6	6	31.9	34.615	816590	791580	790320	799497	807320	696830	806700	770283	1.03793	0.481773
ENSRNOP00000000603	ribosomal protein L10A	Rpl10a	ENSRNOP00000000603.4;ENSRNOP00000090861.1;ENSRNOP00000082732.1;ENSRNOP00000077351.1;ENSRNOP00000088898.1;ENSRNOP00000080756.1;ENSRNOP00000015278.6;ENSRNOP00000089821.1;ENSRNOP00000081327.1;ENSRNOP00000039797.2	ENSRNOP00000000603.4 pep primary_assembly:mRatBN7.2:20:6385823:6391357:1 gene:ENSRNOG00000000505.8 transcript:ENSRNOT00000000603.8 gene_biotype:protein_coding transcript_biotype:protein_coding gene_symbol:Rpl10a description:ribosomal protein L10A [Source:R	10	8	8	8	39.2	24.831	4189300	4321300	4035500	4.18203e+06	4740300	4509800	4200700	4483600	0.93274	0.163249
ENSRNOP00000075811	SRSF protein kinase 1	Srpk1	ENSRNOP00000075811.2;ENSRNOP00000000612.8;ENSRNOP00000076564.1;ENSRNOP00000075400.1;ENSRNOP00000096078.1;ENSRNOP00000092552.1	ENSRNOP00000075811.2 pep primary_assembly:mRatBN7.2:20:6645809:6670457:-1 gene:ENSRNOG00000000511.9 transcript:ENSRNOT00000092641.2 gene_biotype:protein_coding transcript_biotype:protein_coding gene_symbol:Srpk1 description:SRSF protein kinase 1 [Source:RG	6	6	3	3	11.7	73.392	120630	105870	88578	105026	135880	157170	93865	128972	0.814334	0.3133
ENSRNOP00000079746	copine 5	Cpne5	ENSRNOP00000079746.1;ENSRNOP00000000629.3;ENSRNOP00000085748.1;ENSRNOP00000090957.1;ENSRNOP00000097811.1;ENSRNOP00000074693.2;ENSRNOP00000059939.4	ENSRNOP00000079746.1 pep primary_assembly:mRatBN7.2:20:7206742:7288883:-1 gene:ENSRNOG00000000522.6 transcript:ENSRNOT00000101285.1 gene_biotype:protein_coding transcript_biotype:protein_coding gene_symbol:Cpne5 description:copine 5 [Source:RGD Symbol;Acc:	7	14	13	10	35.7	63.793	1033400	1181100	1183600	1132700	1001300	937860	1008800	982653	1.1527	0.0512497
ENSRNOP00000076246	mitochondrial carrier 1	Mtch1	ENSRNOP00000076246.2;ENSRNOP00000000635.4	ENSRNOP00000076246.2 pep primary_assembly:mRatBN7.2:20:7389949:7413426:-1 gene:ENSRNOG00000000527.7 transcript:ENSRNOT00000093172.2 gene_biotype:protein_coding transcript_biotype:protein_coding gene_symbol:Mtch1 description:mitochondrial carrier 1 [Source:	2	8	8	8	26.4	38.435	1868700	1700400	2044900	1.87133e+06	1988400	1955400	1808500	1.91743e+06	0.975957	0.706122
ENSRNOP00000000650	glyoxalase 1	Glo1	ENSRNOP00000000650.4	ENSRNOP00000000650.4 pep primary_assembly:mRatBN7.2:20:8662801:8681649:-1 gene:ENSRNOG00000000541.7 transcript:ENSRNOT00000000650.7 gene_biotype:protein_coding transcript_biotype:protein_coding gene_symbol:Glo1 description:glyoxalase 1 [Source:RGD Symbol;A	1	16	16	16	82.1	20.819	14679000	17055000	15841000	1.58583e+07	16164000	15865000	15777000	1.59353e+07	0.995168	0.917222
ENSRNOP00000064505	hypothetical protein LOC685881		ENSRNOP00000064505.1;ENSRNOP00000000662.4	ENSRNOP00000064505.1 pep primary_assembly:mRatBN7.2:6:22183240:22183602:1 gene:ENSRNOG00000051000.3 transcript:ENSRNOT00000074294.3 gene_biotype:protein_coding transcript_biotype:protein_coding description:hypothetical protein LOC685881 [Source:RGD Symbol;	2	2	2	2	22.5	13.163	276900	257320	237280	257167	250710	256520	236110	247780	1.03788	0.508652
ENSRNOP00000000674	inorganic pyrophosphatase 1	Ppa1	ENSRNOP00000000674.6;ENSRNOP00000078264.1;ENSRNOP00000092973.1	ENSRNOP00000000674.6 pep primary_assembly:mRatBN7.2:20:29590800:29617695:1 gene:ENSRNOG00000063854.1 transcript:ENSRNOT00000000674.7 gene_biotype:protein_coding transcript_biotype:protein_coding gene_symbol:Ppa1 description:inorganic pyrophosphatase 1 [Sou	3	17	17	2	69.2	32.485	5556500	5837100	5756900	5.71683e+06	5669000	5900200	5162000	5.57707e+06	1.02506	0.581588
ENSRNOP00000085944	pterin-4 alpha-carbinolamine de	Pcbd1	ENSRNOP00000085944.1;ENSRNOP00000080781.1;ENSRNOP00000000687.5;ENSRNOP00000086732.1;ENSRNOP00000094935.1	ENSRNOP00000085944.1 pep primary_assembly:mRatBN7.2:20:28953864:29044292:1 gene:ENSRNOG00000000566.7 transcript:ENSRNOT00000120036.1 gene_biotype:protein_coding transcript_biotype:protein_coding gene_symbol:Pcbd1 description:pterin-4 alpha-carbinolamine de	5	3	3	3	41.3	11.999	35285	16489	227080	92951.3	226680	281670	30969	179773	0.517048	0.440804
ENSRNOP00000086321	prosaposin	Psap	ENSRNOP00000086321.1;ENSRNOP00000000696.5;ENSRNOP00000096557.1	ENSRNOP00000086321.1 pep primary_assembly:mRatBN7.2:20:28228275:28240498:1 gene:ENSRNOG00000000571.7 transcript:ENSRNOT00000093802.1 gene_biotype:protein_coding transcript_biotype:protein_coding gene_symbol:Psap description:prosaposin [Source:RGD Symbol;Ac	3	14	14	14	34.2	60.96	8556700	10468000	11920000	10314900	11512000	10961000	11242000	1.12383e+07	0.917832	0.40237
ENSRNOP00000000707	myristoylated alanine rich pr	Marcks	ENSRNOP00000000707.7	ENSRNOP00000000707.7 pep primary_assembly:mRatBN7.2:20:40685315:40691012:-1 gene:ENSRNOG00000000579.7 transcript:ENSRNOT00000000707.7 gene_biotype:protein_coding transcript_biotype:protein_coding gene_symbol:Marcks description:myristoylated alanine rich pr	1	12	12	12	49.2	29.784	4307700	3695200	10528000	6.17697e+06	4006600	7851900	4306200	5.38823e+06	1.14638	0.768854
ENSRNOP00000000710	D-aspartate oxidase	Ddo	ENSRNOP00000000710.3;ENSRNOP00000097953.1;ENSRNOP00000087688.1	ENSRNOP00000000710.3 pep primary_assembly:mRatBN7.2:20:44090914:44110399:1 gene:ENSRNOG00000000582.8 transcript:ENSRNOT00000000710.6 gene_biotype:protein_coding transcript_biotype:protein_coding gene_symbol:Ddo description:D-aspartate oxidase [Source:RGD S	3	2	2	2	10.3	37.543	66294	73752	82074	74040	110100	69627	58261	79329.3	0.933324	0.762911
ENSRNOP00000000733	FYN proto-oncogene, Src family ty	Fyn	ENSRNOP00000000733.1;ENSRNOP00000088889.1;ENSRNOP00000072210.1;ENSRNOP00000068458.1;ENSRNOP00000068462.2;ENSRNOP00000012936.6	ENSRNOP00000000733.1 pep primary_assembly:mRatBN7.2:20:42792180:42959911:1 gene:ENSRNOG00000000596.7 transcript:ENSRNOT00000000733.5 gene_biotype:protein_coding transcript_biotype:protein_coding gene_symbol:Fyn description:FYN proto-oncogene, Src family ty	6	16	13	11	40.8	60.701	1361100	1556700	1143000	1353600	1516800	1430900	1337400	1.42837e+06	0.947656	0.596634
ENSRNOP00000000737	laminin subunit alpha 4	Lama4	ENSRNOP00000000737.8	ENSRNOP00000000737.8 pep primary_assembly:mRatBN7.2:20:42392268:42533347:1 gene:ENSRNOG00000000599.8 transcript:ENSRNOT00000000737.8 gene_biotype:protein_coding transcript_biotype:protein_coding gene_symbol:Lama4 description:laminin subunit alpha 4 [Source	1	9	9	9	7.3	201.52	233920	274280	268660	258953	322990	333630	271880	309500	0.836683	0.0915033
ENSRNOP00000094992	histone deacetylase 2	Hdac2	ENSRNOP00000094992.1;ENSRNOP00000000742.6	ENSRNOP00000094992.1 pep primary_assembly:mRatBN7.2:20:40548250:40568854:1 gene:ENSRNOG00000000604.6 transcript:ENSRNOT00000100766.1 gene_biotype:protein_coding transcript_biotype:protein_coding gene_symbol:Hdac2 description:histone deacetylase 2 [Source:R	2	5	3	3	16.6	53.566	130060	143960	141360	138460	135530	150720	130570	138940	0.996545	0.951476
ENSRNOP00000087939	CDGSH iron sulfur domain 1	Cisd1	ENSRNOP00000087939.1;ENSRNOP00000086958.1;ENSRNOP00000000749.5	ENSRNOP00000087939.1 pep primary_assembly:mRatBN7.2:20:17260252:17284924:1 gene:ENSRNOG00000000610.7 transcript:ENSRNOT00000105985.1 gene_biotype:protein_coding transcript_biotype:protein_coding gene_symbol:Cisd1 description:CDGSH iron sulfur domain 1 [Sou	3	7	7	4	53.5	11.486	10052000	8819800	10044000	9638600	9550700	9578000	9553000	9.56057e+06	1.00816	0.858153
ENSRNOP00000000753	transcription factor A, mitochon	Tfam	ENSRNOP00000000753.2	ENSRNOP00000000753.2 pep primary_assembly:mRatBN7.2:20:17356197:17368292:1 gene:ENSRNOG00000000613.7 transcript:ENSRNOT00000000753.5 gene_biotype:protein_coding transcript_biotype:protein_coding gene_symbol:Tfam description:transcription factor A, mitochon	1	6	6	6	29.1	28.186	580710	447520	504350	510860	513170	445940	418330	459147	1.11263	0.339913
ENSRNOP00000000756	family with sequence similari	Fam13c	ENSRNOP00000000756.8;ENSRNOP00000096331.1;ENSRNOP00000048490.6	ENSRNOP00000000756.8 pep primary_assembly:mRatBN7.2:20:18080353:18187592:-1 gene:ENSRNOG00000000275.9 transcript:ENSRNOT00000000756.8 gene_biotype:protein_coding transcript_biotype:protein_coding gene_symbol:Fam13c description:family with sequence similari	3	3	3	3	12.4	45.576	58477	62910	47596	56327.7	56688	58594	42280	52520.7	1.07249	0.609077
ENSRNOP00000000767	MAM domain containing glycosylp	Mdga2	ENSRNOP00000000767.6;ENSRNOP00000092110.1	ENSRNOP00000000767.6 pep primary_assembly:mRatBN7.2:6:84761941:85608126:-1 gene:ENSRNOG00000000618.8 transcript:ENSRNOT00000000767.6 gene_biotype:protein_coding transcript_biotype:protein_coding gene_symbol:Mdga2 description:MAM domain containing glycosylp	2	3	3	3	5.1	106.72	84697	129740	124500	112979	120780	133920	113180	122627	0.921325	0.566382
ENSRNOP00000093817	NIMA-related kinase 7	Nek7	ENSRNOP00000093817.1;ENSRNOP00000000817.4;ENSRNOP00000069169.1;ENSRNOP00000086821.1	ENSRNOP00000093817.1 pep primary_assembly:mRatBN7.2:13:50022218:50078602:-1 gene:ENSRNOG00000000657.8 transcript:ENSRNOT00000098011.1 gene_biotype:protein_coding transcript_biotype:protein_coding gene_symbol:Nek7 description:NIMA-related kinase 7 [Source:R	4	5	5	5	29.2	33.265	182540	235180	167800	195173	203390	218760	179810	200653	0.972689	0.826178
ENSRNOP00000000874	SV2 related protein	Svop	ENSRNOP00000000874.4;ENSRNOP00000071220.1	ENSRNOP00000000874.4 pep primary_assembly:mRatBN7.2:12:42531032:42590572:1 gene:ENSRNOG00000000693.7 transcript:ENSRNOT00000000874.5 gene_biotype:protein_coding transcript_biotype:protein_coding gene_symbol:Svop description:SV2 related protein [Source:RGD	2	4	4	4	9.6	60.99	360030	408080	417340	395150	339480	464400	352150	385343	1.02545	0.832648
ENSRNOP00000000886	coronin 1C	Coro1c	ENSRNOP00000000886.4;ENSRNOP00000094473.1;ENSRNOP00000094519.1;ENSRNOP00000097058.1;ENSRNOP00000095715.1	ENSRNOP00000000886.4 pep primary_assembly:mRatBN7.2:12:42713015:42785179:1 gene:ENSRNOG00000000697.5 transcript:ENSRNOT00000000886.5 gene_biotype:protein_coding transcript_biotype:protein_coding gene_symbol:Coro1c description:coronin 1C [Source:RGD Symbol;	5	16	16	16	45.6	53.007	5676100	5589300	5640600	5.63533e+06	5812500	5171100	5500700	5.49477e+06	1.02558	0.493799
ENSRNOP00000000890	iron-sulfur cluster assembly en	Iscu	ENSRNOP00000000890.4	ENSRNOP00000000890.4 pep primary_assembly:mRatBN7.2:12:42852305:42858150:-1 gene:ENSRNOG00000000701.6 transcript:ENSRNOT00000000890.6 gene_biotype:protein_coding transcript_biotype:protein_coding gene_symbol:Iscu description:iron-sulfur cluster assembly en	1	3	3	3	17.4	17.967	193380	146230	262240	200617	154290	192850	228310	191817	1.04588	0.836214
ENSRNOP00000000891	spliceosome associated factor 3	Sart3	ENSRNOP00000000891.4	ENSRNOP00000000891.4 pep primary_assembly:mRatBN7.2:12:42859305:42887038:1 gene:ENSRNOG00000000702.6 transcript:ENSRNOT00000000891.6 gene_biotype:protein_coding transcript_biotype:protein_coding gene_symbol:Sart3 description:spliceosome associated factor 3	1	11	11	11	19	111.41	646620	648360	642770	645917	687680	667780	559900	638453	1.01169	0.860134
ENSRNOP00000000898	small G protein signaling modul	Sgsm1	ENSRNOP00000000898.7;ENSRNOP00000086971.1;ENSRNOP00000084191.1;ENSRNOP00000073988.2;ENSRNOP00000032080.4;ENSRNOP00000075916.1	ENSRNOP00000000898.7 pep primary_assembly:mRatBN7.2:12:43321256:43386457:1 gene:ENSRNOG00000000708.8 transcript:ENSRNOT00000000898.8 gene_biotype:protein_coding transcript_biotype:protein_coding gene_symbol:Sgsm1 description:small G protein signaling modul	6	13	13	13	15.9	123.83	471030	599440	936530	669000	711800	853080	788930	784603	0.85266	0.469059
ENSRNOP00000001008	myelin oligodendrocyte glycoprotein	Mog	ENSRNOP00000001008.1;ENSRNOP00000078844.1;ENSRNOP00000087198.1	ENSRNOP00000001008.1 pep primary_assembly:mRatBN7.2:20:1513239:1523474:1 gene:ENSRNOG00000000775.4 transcript:ENSRNOT00000001008.4 gene_biotype:protein_coding transcript_biotype:protein_coding gene_symbol:Mog description:myelin oligodendrocyte glycoprotein	3	14	14	14	42.4	27.828	66175000	55637000	29258000	5.03567e+07	38781000	35340000	38358000	37493000	1.3431	0.308405
ENSRNOP00000001044	RAN binding protein 2	Ranbp2	ENSRNOP00000001044.6;ENSRNOP00000063941.2;ENSRNOP00000077936.1	ENSRNOP00000001044.6 pep primary_assembly:mRatBN7.2:20:26442217:26493481:1 gene:ENSRNOG00000000796.9 transcript:ENSRNOT00000001044.7 gene_biotype:protein_coding transcript_biotype:protein_coding gene_symbol:Ranbp2 description:RAN binding protein 2 [Source:	3	23	23	23	12.1	341.58	894120	844900	702350	813790	769490	786270	647360	734373	1.10814	0.333512
ENSRNOP00000085554	ATP binding cassette subfamily F	Abcf1	ENSRNOP00000085554.1;ENSRNOP00000001049.7;ENSRNOP00000087295.1;ENSRNOP00000090778.1	ENSRNOP00000085554.1 pep primary_assembly:mRatBN7.2:20:2802551:2815427:1 gene:ENSRNOG00000000799.8 transcript:ENSRNOT00000119600.1 gene_biotype:protein_coding transcript_biotype:protein_coding gene_symbol:Abcf1 description:ATP binding cassette subfamily F	4	8	8	8	16	92.176	341520	416500	281100	346373	411230	328230	344290	361250	0.958819	0.765937
ENSRNOP00000001058	mitochondrial ribosomal protein	Mrps18b	ENSRNOP00000001058.4;ENSRNOP00000069189.2;ENSRNOP00000070318.2	ENSRNOP00000001058.4 pep primary_assembly:mRatBN7.2:20:2838030:2844248:1 gene:ENSRNOG00000000804.7 transcript:ENSRNOT00000001058.7 gene_biotype:protein_coding transcript_biotype:protein_coding gene_symbol:Mrps18b description:mitochondrial ribosomal protein	3	4	4	4	21.8	29.159	121110	152100	205390	159533	171700	178720	175730	175383	0.909627	0.555927
ENSRNOP00000001066	serine incorporator 1	Serinc1	ENSRNOP00000001066.4;ENSRNOP00000064593.3	ENSRNOP00000001066.4 pep primary_assembly:mRatBN7.2:20:36850076:36868961:-1 gene:ENSRNOG00000029360.6 transcript:ENSRNOT00000001066.7 gene_biotype:protein_coding transcript_biotype:protein_coding gene_symbol:Serinc1 description:serine incorporator 1 [Sourc	2	4	4	4	11.3	50.553	362490	389210	370630	374110	461660	432660	384250	426190	0.877801	0.0950722
ENSRNOP00000088040	alpha tubulin acetyltransferase 1	Atat1	ENSRNOP00000088040.1;ENSRNOP00000073934.2;ENSRNOP00000001077.5;ENSRNOP00000075030.2;ENSRNOP00000074047.2;ENSRNOP00000001065.4	ENSRNOP00000088040.1 pep primary_assembly:mRatBN7.2:20:2844616:2855719:1 gene:ENSRNOG00000000809.8 transcript:ENSRNOT00000080158.2 gene_biotype:protein_coding transcript_biotype:protein_coding gene_symbol:Atat1 description:alpha tubulin acetyltransferase 1	6	9	9	9	35.1	37.568	555910	614580	643090	604527	594830	733130	578610	635523	0.951227	0.605275
ENSRNOP00000001079	fatty acid binding protein 7	Fabp7	ENSRNOP00000001079.4;ENSRNOP00000085320.1	ENSRNOP00000001079.4 pep primary_assembly:mRatBN7.2:20:37123193:37126725:1 gene:ENSRNOG00000000814.6 transcript:ENSRNOT00000001079.6 gene_biotype:protein_coding transcript_biotype:protein_coding gene_symbol:Fabp7 description:fatty acid binding protein 7 [S	2	8	8	8	69.7	14.864	7035800	6453000	4721800	6070200	4603600	5268800	4206600	4693000	1.29346	0.144528
ENSRNOP00000001114	ATPase H+ transporting V1 sub	Atp6v1g2	ENSRNOP00000001114.2;ENSRNOP00000075387.2;ENSRNOP00000072340.1	ENSRNOP00000001114.2 pep primary_assembly:mRatBN7.2:20:3587696:3589909:-1 gene:ENSRNOG00000000840.7 transcript:ENSRNOT00000001114.6 gene_biotype:protein_coding transcript_biotype:protein_coding gene_symbol:Atp6v1g2 description:ATPase H+ transporting V1 sub	3	10	10	8	61	13.667	24665000	23426000	21638000	23243000	24968000	24418000	23912000	2.44327e+07	0.951308	0.269993
ENSRNOP00000001115	DExD-box helicase 39B	Ddx39b	ENSRNOP00000001115.4;ENSRNOP00000084309.1;ENSRNOP00000093667.1;ENSRNOP00000075517.2;ENSRNOP00000077493.1;ENSRNOP00000068949.1;ENSRNOP00000086544.1;ENSRNOP00000082759.1;ENSRNOP00000040666.3	ENSRNOP00000001115.4 pep primary_assembly:mRatBN7.2:20:3572523:3584996:-1 gene:ENSRNOG00000000841.8 transcript:ENSRNOT00000001115.7 gene_biotype:protein_coding transcript_biotype:protein_coding gene_symbol:Ddx39b description:DExD-box helicase 39B [Source:R	9	14	14	14	49.8	49.035	2155100	2409600	2269300	2278000	2198100	2199400	1900800	2.09943e+06	1.08505	0.222089
ENSRNOP00000085491	allograft inflammatory factor 1	Aif1	ENSRNOP00000085491.1;ENSRNOP00000068279.1;ENSRNOP00000001138.7;ENSRNOP00000097049.1;ENSRNOP00000001135.4	ENSRNOP00000085491.1 pep primary_assembly:mRatBN7.2:20:3646777:3652668:1 gene:ENSRNOG00000000853.8 transcript:ENSRNOT00000097547.1 gene_biotype:protein_coding transcript_biotype:protein_coding gene_symbol:Aif1 description:allograft inflammatory factor 1 [S	5	1	1	1	18.1	10.793	78604	93505	128280	100130	63981	95481	97074	85512	1.17094	0.467814
ENSRNOP00000096317			ENSRNOP00000096317.1;ENSRNOP00000088717.1;ENSRNOP00000084113.1;ENSRNOP00000001158.7;ENSRNOP00000083356.1	ENSRNOP00000096317.1 pep primary_assembly:mRatBN7.2:X:135146786:135197390:-1 gene:ENSRNOG00000000869.8 transcript:ENSRNOT00000096866.1 gene_biotype:protein_coding transcript_biotype:protein_coding;ENSRNOP00000088717.1 pep primary_assembly:mRatBN7.2:X:13514	5	7	6	6	19.5	55.04	351320	320950	348060	340110	405140	415590	351440	390723	0.870462	0.0836543
ENSRNOP00000001160	valyl-tRNA synthetase 1	Vars1	ENSRNOP00000001160.4;ENSRNOP00000072696.2	ENSRNOP00000001160.4 pep primary_assembly:mRatBN7.2:20:3805776:3820298:-1 gene:ENSRNOG00000000867.7 transcript:ENSRNOT00000001160.7 gene_biotype:protein_coding transcript_biotype:protein_coding gene_symbol:Vars1 description:valyl-tRNA synthetase 1 [Source:	2	30	30	30	37.9	140.37	3788300	4083600	4412800	4094900	4329400	4641200	4069500	4346700	0.942071	0.3615
ENSRNOP00000001190	SBDS, ribosome maturation factor	Sbds	ENSRNOP00000001190.4;ENSRNOP00000093962.1;ENSRNOP00000092272.1	ENSRNOP00000001190.4 pep primary_assembly:mRatBN7.2:12:26420435:26429643:1 gene:ENSRNOG00000000888.4 transcript:ENSRNOT00000001190.4 gene_biotype:protein_coding transcript_biotype:protein_coding gene_symbol:Sbds description:SBDS, ribosome maturation factor	3	6	6	6	31.6	28.439	267910	264480	35519	189303	65410	276080	71192	137561	1.37614	0.64339
ENSRNOP00000090633	RAB guanine nucleotide excha	Rabgef1	ENSRNOP00000090633.1;ENSRNOP00000001196.3	ENSRNOP00000090633.1 pep primary_assembly:mRatBN7.2:12:26460214:26503744:-1 gene:ENSRNOG00000000895.5 transcript:ENSRNOT00000105396.1 gene_biotype:protein_coding transcript_biotype:protein_coding gene_symbol:Rabgef1 description:RAB guanine nucleotide excha	2	3	3	3	6.9	56.845	170350	164190	158890	164477	116840	155060	143010	138303	1.18925	0.0899962
ENSRNOP00000082622	heat shock protein family H (Hsp1	Hsph1	ENSRNOP00000082622.1;ENSRNOP00000001201.6;ENSRNOP00000089171.1;ENSRNOP00000095841.1	ENSRNOP00000082622.1 pep primary_assembly:mRatBN7.2:12:5390922:5410224:1 gene:ENSRNOG00000000902.8 transcript:ENSRNOT00000116960.1 gene_biotype:protein_coding transcript_biotype:protein_coding gene_symbol:Hsph1 description:heat shock protein family H (Hsp1	4	45	42	42	69.7	91.669	23348000	22256000	18150000	2.12513e+07	20706000	22018000	21256000	2.13267e+07	0.996468	0.965299
ENSRNOP00000095504	argininosuccinate lyase	Asl	ENSRNOP00000095504.1;ENSRNOP00000001211.7;ENSRNOP00000089055.1	ENSRNOP00000095504.1 pep primary_assembly:mRatBN7.2:12:26659565:26677132:1 gene:ENSRNOG00000000903.8 transcript:ENSRNOT00000103968.1 gene_biotype:protein_coding transcript_biotype:protein_coding gene_symbol:Asl description:argininosuccinate lyase [Source:R	3	7	7	7	22.3	51.39	388960	493400	477570	453310	561560	503210	369850	478207	0.947937	0.72273
ENSRNOP00000085358	coiled-coil-helix-coiled-coil-	Chchd2	ENSRNOP00000085358.1;ENSRNOP00000065307.1;ENSRNOP00000001220.5	ENSRNOP00000085358.1 pep primary_assembly:mRatBN7.2:12:26828736:26834755:1 gene:ENSRNOG00000065713.1 transcript:ENSRNOT00000105914.1 gene_biotype:protein_coding transcript_biotype:protein_coding gene_symbol:Chchd2 description:coiled-coil-helix-coiled-coil-	3	4	4	4	31.2	15.782	637320	568760	585720	597267	592450	627130	585660	601747	0.992555	0.862638
ENSRNOP00000082260	phosphorylase kinase catalytic	Phkg1	ENSRNOP00000082260.1;ENSRNOP00000001222.1	ENSRNOP00000082260.1 pep primary_assembly:mRatBN7.2:12:26838968:26852712:1 gene:ENSRNOG00000000920.5 transcript:ENSRNOT00000114188.1 gene_biotype:protein_coding transcript_biotype:protein_coding gene_symbol:Phkg1 description:phosphorylase kinase catalytic	2	1	1	1	4	43.798	109210	113610	110270	111030	114480	92595	98667	101914	1.08945	0.242685
ENSRNOP00000001227	chaperonin containing TCP1 sub	Cct6a	ENSRNOP00000001227.4;ENSRNOP00000092130.1;ENSRNOP00000083923.1;ENSRNOP00000079514.1;ENSRNOP00000096586.1;ENSRNOP00000091960.1;ENSRNOP00000009944.6	ENSRNOP00000001227.4 pep primary_assembly:mRatBN7.2:12:26872574:26882974:-1 gene:ENSRNOG00000000923.9 transcript:ENSRNOT00000001227.8 gene_biotype:protein_coding transcript_biotype:protein_coding gene_symbol:Cct6a description:chaperonin containing TCP1 sub	7	24	24	24	61.5	61.743	11986000	11577000	12227000	11930000	11857000	11879000	11640000	11792000	1.0117	0.536734
ENSRNOP00000001229	mitochondrial ribosomal prote	Mrps17	ENSRNOP00000001229.4	ENSRNOP00000001229.4 pep primary_assembly:mRatBN7.2:12:26948730:26951737:-1 gene:ENSRNOG00000000926.8 transcript:ENSRNOT00000001229.7 gene_biotype:protein_coding transcript_biotype:protein_coding gene_symbol:Mrps17 description:mitochondrial ribosomal prote	1	3	3	3	47.2	13.999	147280	91616	156100	131665	185280	172740	175270	177763	0.740678	0.0882617
ENSRNOP00000001247	RAN, member RAS oncogene family	Ran	ENSRNOP00000001247.4;ENSRNOP00000039019.2;ENSRNOP00000043623.3	ENSRNOP00000001247.4 pep primary_assembly:mRatBN7.2:12:27674050:27678276:-1 gene:ENSRNOG00000000938.8 transcript:ENSRNOT00000001247.8 gene_biotype:protein_coding transcript_biotype:protein_coding gene_symbol:Ran description:RAN, member RAS oncogene family	3	13	13	13	54.6	24.423	7447900	6714700	6159100	6773900	7166700	6701300	8718900	7.52897e+06	0.899712	0.350555
ENSRNOP00000001292	acetoacetyl-CoA synthetase	Aacs	ENSRNOP00000001292.3;ENSRNOP00000081188.1	ENSRNOP00000001292.3 pep primary_assembly:mRatBN7.2:12:31113102:31156452:-1 gene:ENSRNOG00000000967.6 transcript:ENSRNOT00000001292.6 gene_biotype:protein_coding transcript_biotype:protein_coding gene_symbol:Aacs description:acetoacetyl-CoA synthetase [Sou	2	2	2	2	2.7	75.039		32479	36708	34593.5	35670	14417		25043.5	1.38134	0.471066
ENSRNOP00000001298	patatin-like phospholipase domai	Pnpla6	ENSRNOP00000001298.6;ENSRNOP00000065231.2	ENSRNOP00000001298.6 pep primary_assembly:mRatBN7.2:12:1560363:1603734:1 gene:ENSRNOG00000000977.9 transcript:ENSRNOT00000001298.8 gene_biotype:protein_coding transcript_biotype:protein_coding gene_symbol:Pnpla6 description:patatin-like phospholipase domai	2	4	4	4	4.6	148.63	95149	109160	85935	96748	100370	92703	83147	92073.3	1.05077	0.607153
ENSRNOP00000096235	PDGFA associated protein 1	Pdap1	ENSRNOP00000096235.1;ENSRNOP00000001310.4;ENSRNOP00000081375.1;ENSRNOP00000085448.1	ENSRNOP00000096235.1 pep primary_assembly:mRatBN7.2:12:9473780:9535374:1 gene:ENSRNOG00000000990.8 transcript:ENSRNOT00000100938.1 gene_biotype:protein_coding transcript_biotype:protein_coding gene_symbol:Pdap1 description:PDGFA associated protein 1 [Sourc	4	6	6	6	32.2	20.5	1729800	1556500	1642900	1.64307e+06	1779000	1799300	1676600	1.75163e+06	0.93802	0.158942
ENSRNOP00000001315	actin related protein 2/3 compl	Arpc1b	ENSRNOP00000001315.5;ENSRNOP00000091680.1	ENSRNOP00000001315.5 pep primary_assembly:mRatBN7.2:12:9482291:9495747:-1 gene:ENSRNOG00000000991.7 transcript:ENSRNOT00000001315.7 gene_biotype:protein_coding transcript_biotype:protein_coding gene_symbol:Arpc1b description:actin related protein 2/3 compl	2	3	2	2	17.3	36.764	76828	109140	132080	106016	93821	116300	99805	103309	1.02621	0.883748
ENSRNOP00000080732	trafficking protein particle co	Trappc5	ENSRNOP00000080732.1;ENSRNOP00000001327.3	ENSRNOP00000080732.1 pep primary_assembly:mRatBN7.2:12:1737627:1742637:1 gene:ENSRNOG00000001003.7 transcript:ENSRNOT00000111016.1 gene_biotype:protein_coding transcript_biotype:protein_coding gene_symbol:Trappc5 description:trafficking protein particle co	2	3	3	3	18.1	20.795		109760	70285	90022.5	109730	111120	311300	177383	0.507503	0.392544
ENSRNOP00000001347	tectonin beta-propeller repeat	Tecpr1	ENSRNOP00000001347.5	ENSRNOP00000001347.5 pep primary_assembly:mRatBN7.2:12:10391696:10419611:1 gene:ENSRNOG00000001010.8 transcript:ENSRNOT00000001347.8 gene_biotype:protein_coding transcript_biotype:protein_coding gene_symbol:Tecpr1 description:tectonin beta-propeller repeat	1	21	21	21	28.5	130.19	2297500	2537400	2368800	2.40123e+06	2918100	2558900	2646600	2.70787e+06	0.886762	0.0768799
ENSRNOP00000001365	CCZ1 homolog B, vacuolar protei	Ccz1b	ENSRNOP00000001365.6;ENSRNOP00000075894.2;ENSRNOP00000069032.2;ENSRNOP00000082981.1	ENSRNOP00000001365.6 pep primary_assembly:mRatBN7.2:12:10601080:10624606:1 gene:ENSRNOG00000001032.8 transcript:ENSRNOT00000001365.8 gene_biotype:protein_coding transcript_biotype:protein_coding gene_symbol:Ccz1b description:CCZ1 homolog B, vacuolar protei	4	6	6	6	17.9	55.596	222850	242890	221910	229217	329390	179350	341380	283373	0.808886	0.361169
ENSRNOP00000001367	ecotropic viral integration site	Evi5l	ENSRNOP00000001367.7;ENSRNOP00000092619.1;ENSRNOP00000070107.2;ENSRNOP00000071761.2	ENSRNOP00000001367.7 pep primary_assembly:mRatBN7.2:12:2519675:2558764:1 gene:ENSRNOG00000001034.8 transcript:ENSRNOT00000001367.8 gene_biotype:protein_coding transcript_biotype:protein_coding gene_symbol:Evi5l description:ecotropic viral integration site	4	6	6	6	12.2	87.185	252540	264670	256990	258067	239290	261460	247190	249313	1.03511	0.30189
ENSRNOP00000001379	aminoacyl tRNA synthetase compl	Aimp2	ENSRNOP00000001379.3	ENSRNOP00000001379.3 pep primary_assembly:mRatBN7.2:12:10701194:10710769:1 gene:ENSRNOG00000001044.8 transcript:ENSRNOT00000001379.6 gene_biotype:protein_coding transcript_biotype:protein_coding gene_symbol:Aimp2 description:aminoacyl tRNA synthetase compl	1	3	3	3	20.4	35.215	5155.2	50720	84587	46820.7	30319	122460		76389.5	0.612921	0.561355
ENSRNOP00000001383	tumor protein, translationally-c	Tpt1	ENSRNOP00000001383.4;ENSRNOP00000093410.1;ENSRNOP00000082883.1;ENSRNOP00000094066.1;ENSRNOP00000094750.1;ENSRNOP00000097925.1	ENSRNOP00000001383.4 pep primary_assembly:mRatBN7.2:15:51156708:51159625:1 gene:ENSRNOG00000001049.8 transcript:ENSRNOT00000001383.8 gene_biotype:protein_coding transcript_biotype:protein_coding gene_symbol:Tpt1 description:tumor protein, translationally-c	6	8	8	8	41.9	19.462	4710200	4495900	4528000	4.57803e+06	4446300	3709000	4942900	4.36607e+06	1.04855	0.592185
ENSRNOP00000001397	transmembrane p24 trafficking	Tmed2	ENSRNOP00000001397.3;ENSRNOP00000077165.1	ENSRNOP00000001397.3 pep primary_assembly:mRatBN7.2:12:32052543:32071903:-1 gene:ENSRNOG00000001053.6 transcript:ENSRNOT00000001397.5 gene_biotype:protein_coding transcript_biotype:protein_coding gene_symbol:Tmed2 description:transmembrane p24 trafficking	2	4	4	4	30.8	22.733	291200	446060	394870	377377	329490	500480	189850	339940	1.11013	0.728958
ENSRNOP00000082089	Rab interacting lysosomal prot	Rilpl1	ENSRNOP00000082089.1;ENSRNOP00000072380.2;ENSRNOP00000001401.6;ENSRNOP00000087559.1;ENSRNOP00000082699.1;ENSRNOP00000095878.1;ENSRNOP00000001403.4;ENSRNOP00000094174.1	ENSRNOP00000082089.1 pep primary_assembly:mRatBN7.2:12:32071693:32103123:1 gene:ENSRNOG00000001055.8 transcript:ENSRNOT00000098666.1 gene_biotype:protein_coding transcript_biotype:protein_coding gene_symbol:Rilpl1 description:Rab interacting lysosomal prot	8	7	7	7	26.2	41.734	320080	283530	287120	296910	291570	272820	296970	287120	1.0341	0.515555
ENSRNOP00000092697	translocase of inner mitochondr	Timm44	ENSRNOP00000092697.1;ENSRNOP00000001409.4;ENSRNOP00000081452.1	ENSRNOP00000092697.1 pep primary_assembly:mRatBN7.2:12:2612581:2629351:-1 gene:ENSRNOG00000001058.5 transcript:ENSRNOT00000098717.1 gene_biotype:protein_coding transcript_biotype:protein_coding gene_symbol:Timm44 description:translocase of inner mitochondr	3	9	9	9	26	47.589	853340	1273600	851460	992800	939750	1663000	882150	1.16163e+06	0.854659	0.588964
ENSRNOP00000001412	cytohesin 3	Cyth3	ENSRNOP00000001412.8	ENSRNOP00000001412.8 pep primary_assembly:mRatBN7.2:12:10840157:10933812:-1 gene:ENSRNOG00000001065.8 transcript:ENSRNOT00000001412.8 gene_biotype:protein_coding transcript_biotype:protein_coding gene_symbol:Cyth3 description:cytohesin 3 [Source:RGD Symbol	1	6	6	5	26.4	45.764	240380	246020	199330	228577	228090	216710	185300	210033	1.08829	0.395466
ENSRNOP00000001415	ELAV like RNA binding protein 1	Elavl1	ENSRNOP00000001415.5	ENSRNOP00000001415.5 pep primary_assembly:mRatBN7.2:12:2645061:2684784:-1 gene:ENSRNOG00000001069.7 transcript:ENSRNOT00000001415.7 gene_biotype:protein_coding transcript_biotype:protein_coding gene_symbol:Elavl1 description:ELAV like RNA binding protein 1	1	6	6	6	29.8	36.169	601280	591580	580540	591133	641960	677470	549850	623093	0.948708	0.453119
ENSRNOP00000023515	HIG1 hypoxia inducible domain	Higd2a	ENSRNOP00000023515.3;ENSRNOP00000001416.1	ENSRNOP00000023515.3 pep primary_assembly:mRatBN7.2:17:10021859:10022796:-1 gene:ENSRNOG00000017372.7 transcript:ENSRNOT00000023515.7 gene_biotype:protein_coding transcript_biotype:protein_coding gene_symbol:Higd2a description:HIG1 hypoxia inducible domain	2	1	1	1	17.9	11.43		267610	301820	284715	294250	308270		301260	0.945081	0.465226
ENSRNOP00000088871	VPS37B subunit of ESCRT-I	Vps37b	ENSRNOP00000088871.1;ENSRNOP00000001445.5;ENSRNOP00000089595.1	ENSRNOP00000088871.1 pep primary_assembly:mRatBN7.2:12:32560047:32587393:1 gene:ENSRNOG00000001086.6 transcript:ENSRNOT00000104349.1 gene_biotype:protein_coding transcript_biotype:protein_coding gene_symbol:Vps37b description:VPS37B subunit of ESCRT-I [Sou	3	3	2	2	17.9	30.509	323250	213040	209020	248437	208820	199260	204980	204353	1.21572	0.305275
ENSRNOP00000041874	PDS5 cohesin associated factor B	Pds5b	ENSRNOP00000041874.6;ENSRNOP00000083511.1;ENSRNOP00000001464.5;ENSRNOP00000063199.2;ENSRNOP00000092974.1;ENSRNOP00000040297.6	ENSRNOP00000041874.6 pep primary_assembly:mRatBN7.2:12:255313:334077:1 gene:ENSRNOG00000001098.9 transcript:ENSRNOT00000040830.6 gene_biotype:protein_coding transcript_biotype:protein_coding gene_symbol:Pds5b description:PDS5 cohesin associated factor B [S	6	2	2	2	2.5	134.13	48651	55005	28524	44060	37476	58805	32436	42905.7	1.0269	0.923945
ENSRNOP00000001467	density regulated reinitiation	Denr	ENSRNOP00000001467.8;ENSRNOP00000078666.1	ENSRNOP00000001467.8 pep primary_assembly:mRatBN7.2:12:32662516:32683843:-1 gene:ENSRNOG00000001106.8 transcript:ENSRNOT00000001467.8 gene_biotype:protein_coding transcript_biotype:protein_coding gene_symbol:Denr description:density regulated reinitiation	2	7	7	7	40.6	21.636	1339800	1382300	1488200	1.40343e+06	1246900	1409600	1318700	1.32507e+06	1.05914	0.291318
ENSRNOP00000001479	F-box and leucine-rich repeat	Fbxl18	ENSRNOP00000001479.7;ENSRNOP00000077132.1;ENSRNOP00000090825.1	ENSRNOP00000001479.7 pep primary_assembly:mRatBN7.2:12:11676215:11696620:1 gene:ENSRNOG00000001117.7 transcript:ENSRNOT00000001479.7 gene_biotype:protein_coding transcript_biotype:protein_coding gene_symbol:Fbxl18 description:F-box and leucine-rich repeat	3	3	3	3	7.6	75.233	27749	21088	27653	25496.7	61198	11531	19847	30858.7	0.82624	0.747066
ENSRNOP00000001493	nitric oxide synthase 1	Nos1	ENSRNOP00000001493.6;ENSRNOP00000077880.1;ENSRNOP00000062735.2	ENSRNOP00000001493.6 pep primary_assembly:mRatBN7.2:12:38626714:38710945:-1 gene:ENSRNOG00000001130.9 transcript:ENSRNOT00000001493.9 gene_biotype:protein_coding transcript_biotype:protein_coding gene_symbol:Nos1 description:nitric oxide synthase 1 [Source	3	22	22	22	22.5	160.46	779970	869360	1759900	1136410	1087000	1632800	1261200	1327000	0.856375	0.616745
ENSRNOP00000097041	WD repeat and SOCS box-containi	Wsb2	ENSRNOP00000097041.1;ENSRNOP00000001499.5;ENSRNOP00000077859.1;ENSRNOP00000081254.1;ENSRNOP00000095227.1	ENSRNOP00000097041.1 pep primary_assembly:mRatBN7.2:12:39217850:39238640:-1 gene:ENSRNOG00000001135.7 transcript:ENSRNOT00000108322.1 gene_biotype:protein_coding transcript_biotype:protein_coding gene_symbol:Wsb2 description:WD repeat and SOCS box-containi	5	4	4	4	15.7	42.603	149090	170800	125090	148327	149090	130900	150670	143553	1.03325	0.760823
ENSRNOP00000082473	GCN1 activator of EIF2AK4	Gcn1	ENSRNOP00000082473.1;ENSRNOP00000001517.7	ENSRNOP00000082473.1 pep primary_assembly:mRatBN7.2:12:40991512:41045887:-1 gene:ENSRNOG00000021871.7 transcript:ENSRNOT00000094827.1 gene_biotype:protein_coding transcript_biotype:protein_coding gene_symbol:Gcn1 description:GCN1 activator of EIF2AK4 [Sour	2	25	25	25	13.9	289.93	890050	981420	1183500	1.01832e+06	1039700	1108800	990790	1046430	0.97314	0.778032
ENSRNOP00000001518	ribosomal protein lateral stal	Rplp0	ENSRNOP00000001518.3;ENSRNOP00000046157.6	ENSRNOP00000001518.3 pep primary_assembly:mRatBN7.2:12:41054179:41057632:-1 gene:ENSRNOG00000001148.7 transcript:ENSRNOT00000001518.7 gene_biotype:protein_coding transcript_biotype:protein_coding gene_symbol:Rplp0 description:ribosomal protein lateral stal	2	12	12	12	47.6	34.215	6145400	6161600	6631100	6312700	5989000	6309700	5888700	6.06247e+06	1.04128	0.286578
ENSRNOP00000001534	TP53 regulated inhib	NEWGENE_1586233	ENSRNOP00000001534.2	ENSRNOP00000001534.2 pep primary_assembly:mRatBN7.2:12:41267549:41270042:-1 gene:ENSRNOG00000001160.6 transcript:ENSRNOT00000001534.6 gene_biotype:protein_coding transcript_biotype:protein_coding gene_symbol:NEWGENE_1586233 description:TP53 regulated inhib	1	1	1	1	18.4	8.7558	126540	150930	156450	144640	109930	184560	116970	137153	1.05459	0.783698
ENSRNOP00000001545	cytochrome c oxidase subunit 6	Cox6a1	ENSRNOP00000001545.4;ENSRNOP00000078588.1	ENSRNOP00000001545.4 pep primary_assembly:mRatBN7.2:12:41261967:41265041:1 gene:ENSRNOG00000001170.5 transcript:ENSRNOT00000001545.5 gene_biotype:protein_coding transcript_biotype:protein_coding gene_symbol:Cox6a1 description:cytochrome c oxidase subunit 6	2	3	3	3	42	12.429	9513600	10765000	12769000	1.10159e+07	12003000	12079000	11361000	1.18143e+07	0.932415	0.458828
ENSRNOP00000001547	coenzyme Q5, methyltransferase	Coq5	ENSRNOP00000001547.3	ENSRNOP00000001547.3 pep primary_assembly:mRatBN7.2:12:41316748:41333848:-1 gene:ENSRNOG00000001171.7 transcript:ENSRNOT00000001546.7 gene_biotype:protein_coding transcript_biotype:protein_coding gene_symbol:Coq5 description:coenzyme Q5, methyltransferase	1	8	8	8	31.5	37.3	713710	772200	769310	751740	849020	874310	775550	832960	0.902492	0.0823104
ENSRNOP00000090547	NADH:ubiquinone oxidoreductase s	Ndufv3	ENSRNOP00000090547.1;ENSRNOP00000092722.1;ENSRNOP00000001564.2	ENSRNOP00000090547.1 pep primary_assembly:mRatBN7.2:20:9616768:9621622:1 gene:ENSRNOG00000001182.8 transcript:ENSRNOT00000117823.1 gene_biotype:protein_coding transcript_biotype:protein_coding gene_symbol:Ndufv3 description:NADH:ubiquinone oxidoreductase s	3	8	8	7	34	46.088	1259600	1606300	1957700	1.60787e+06	1555300	1587500	1269900	1470900	1.09312	0.5762
ENSRNOP00000001581	glycolipid transfer protein	Gltp	ENSRNOP00000001581.5	ENSRNOP00000001581.5 pep primary_assembly:mRatBN7.2:12:41907144:41927319:1 gene:ENSRNOG00000001192.7 transcript:ENSRNOT00000001581.7 gene_biotype:protein_coding transcript_biotype:protein_coding gene_symbol:Gltp description:glycolipid transfer protein [Sou	1	6	6	6	32.1	23.703	2943900	1977000	1510900	2.14393e+06	1501300	1779200	2643100	1.97453e+06	1.08579	0.771178
ENSRNOP00000001589	pyridoxal kinase	Pdxk	ENSRNOP00000001589.3;ENSRNOP00000090354.1;ENSRNOP00000084402.1	ENSRNOP00000001589.3 pep primary_assembly:mRatBN7.2:20:10210289:10232110:1 gene:ENSRNOG00000049937.3 transcript:ENSRNOT00000001589.7 gene_biotype:protein_coding transcript_biotype:protein_coding gene_symbol:Pdxk description:pyridoxal kinase [Source:RGD Sym	3	15	15	15	59.3	34.855	8034600	6922400	7055800	7337600	6726200	6998000	8274000	7.33273e+06	1.00066	0.993836
ENSRNOP00000001593	cystatin B	Cstb	ENSRNOP00000001593.2;ENSRNOP00000077618.1	ENSRNOP00000001593.2 pep primary_assembly:mRatBN7.2:20:10245462:10247526:-1 gene:ENSRNOG00000001201.5 transcript:ENSRNOT00000001593.5 gene_biotype:protein_coding transcript_biotype:protein_coding gene_symbol:Cstb description:cystatin B [Source:RGD Symbol;A	2	4	4	4	57.1	11.196	1644100	1626400	1583800	1618100	1899100	1584800	1496700	1660200	0.974642	0.750206
ENSRNOP00000001602	1-acylglycerol-3-phosphate O-a	Agpat3	ENSRNOP00000001602.5	ENSRNOP00000001602.5 pep primary_assembly:mRatBN7.2:20:10384507:10415358:1 gene:ENSRNOG00000001205.6 transcript:ENSRNOT00000001602.6 gene_biotype:protein_coding transcript_biotype:protein_coding gene_symbol:Agpat3 description:1-acylglycerol-3-phosphate O-a	1	10	10	10	23.9	43.245	1201800	1300100	1149200	1.21703e+06	1450400	1271800	1175500	1.29923e+06	0.936732	0.421527
ENSRNOP00000001625	phosphofructokinase, liver type	Pfkl	ENSRNOP00000001625.3	ENSRNOP00000001625.3 pep primary_assembly:mRatBN7.2:20:10664272:10686315:1 gene:ENSRNOG00000001214.6 transcript:ENSRNOT00000001625.6 gene_biotype:protein_coding transcript_biotype:protein_coding gene_symbol:Pfkl description:phosphofructokinase, liver type	1	26	22	22	48.5	85.338	14649000	17277000	17506000	1.64773e+07	19302000	19264000	16883000	18483000	0.891486	0.174587
ENSRNOP00000001639	integrin subunit beta 2	Itgb2	ENSRNOP00000001639.5;ENSRNOP00000082439.1	ENSRNOP00000001639.5 pep primary_assembly:mRatBN7.2:20:11061430:11097600:-1 gene:ENSRNOG00000001224.7 transcript:ENSRNOT00000001639.7 gene_biotype:protein_coding transcript_biotype:protein_coding gene_symbol:Itgb2 description:integrin subunit beta 2 [Sourc	2	3	3	3	6.4	84.817	44506	40344	57855	47568.3	37377	49545	56598	47840	0.994321	0.973573
ENSRNOP00000001644	protein O-fucosyltransferase	Pofut2	ENSRNOP00000001644.5	ENSRNOP00000001644.5 pep primary_assembly:mRatBN7.2:20:11367096:11377743:-1 gene:ENSRNOG00000001228.7 transcript:ENSRNOT00000001644.6 gene_biotype:protein_coding transcript_biotype:protein_coding gene_symbol:Pofut2 description:protein O-fucosyltransferase	1	1	1	1	4.7	51.287		32983	19127	26055	27932	30332	36692	31652	0.823171	0.431105
ENSRNOP00000090349	glutathione S-transferase theta	Gstt1	ENSRNOP00000090349.1;ENSRNOP00000001669.3	ENSRNOP00000090349.1 pep primary_assembly:mRatBN7.2:20:12858242:12873585:1 gene:ENSRNOG00000049771.2 transcript:ENSRNOT00000097156.1 gene_biotype:protein_coding transcript_biotype:protein_coding gene_symbol:Gstt1 description:glutathione S-transferase theta	2	2	2	2	11.1	25.466	72595	89232	73033	78286.7	88179	85261	61254	78231.3	1.00071	0.995906
ENSRNOP00000001679	collagen type VI alpha 1 chain	Col6a1	ENSRNOP00000001679.5;ENSRNOP00000067777.2	ENSRNOP00000001679.5 pep primary_assembly:mRatBN7.2:20:11905957:11924597:1 gene:ENSRNOG00000001249.9 transcript:ENSRNOT00000001679.8 gene_biotype:protein_coding transcript_biotype:protein_coding gene_symbol:Col6a1 description:collagen type VI alpha 1 chain	2	5	5	5	8.6	109.79	89713	132890	189380	137328	188250	242660	141780	190897	0.719382	0.261604
ENSRNOP00000001685	CAP-GLY domain containing linke	Clip1	ENSRNOP00000001685.8;ENSRNOP00000093783.1;ENSRNOP00000093663.1;ENSRNOP00000072766.2;ENSRNOP00000092485.1;ENSRNOP00000087368.1;ENSRNOP00000073711.2;ENSRNOP00000090148.1;ENSRNOP00000079550.1;ENSRNOP00000068884.1	ENSRNOP00000001685.8 pep primary_assembly:mRatBN7.2:12:32910991:33016902:1 gene:ENSRNOG00000001247.8 transcript:ENSRNOT00000001685.8 gene_biotype:protein_coding transcript_biotype:protein_coding gene_symbol:Clip1 description:CAP-GLY domain containing linke	10	35	30	30	33.6	148.28	1591300	1571700	1409900	1524300	1723200	1635200	1486200	1.61487e+06	0.943917	0.370887
ENSRNOP00000079599	ataxin 2	Atxn2	ENSRNOP00000079599.1;ENSRNOP00000001691.8;ENSRNOP00000089697.1;ENSRNOP00000095616.1	ENSRNOP00000079599.1 pep primary_assembly:mRatBN7.2:12:34754137:34823560:-1 gene:ENSRNOG00000001256.9 transcript:ENSRNOT00000115112.1 gene_biotype:protein_coding transcript_biotype:protein_coding gene_symbol:Atxn2 description:ataxin 2 [Source:RGD Symbol;Ac	4	7	7	7	10.5	113.73	481780	480210	463380	475123	542100	450610	398620	463777	1.02447	0.802007
ENSRNOP00000001716	proteasome assembly chaperone 3	Psmg3	ENSRNOP00000001716.4	ENSRNOP00000001716.4 pep primary_assembly:mRatBN7.2:12:14809450:14812342:1 gene:ENSRNOG00000001273.8 transcript:ENSRNOT00000001716.8 gene_biotype:protein_coding transcript_biotype:protein_coding gene_symbol:Psmg3 description:proteasome assembly chaperone 3	1	1	1	1	12.3	13.346	33540	63494	40352	45795.3	74138	69913	44663	62904.7	0.728012	0.255933
ENSRNOP00000001738	ATPase sarcoplasmic/endoplasmi	Atp2a2	ENSRNOP00000001738.7;ENSRNOP00000024347.8;ENSRNOP00000076411.1;ENSRNOP00000091865.1;ENSRNOP00000067246.3;ENSRNOP00000082916.1;ENSRNOP00000075069.2;ENSRNOP00000060512.1;ENSRNOP00000060212.2	ENSRNOP00000001738.7 pep primary_assembly:mRatBN7.2:12:34072710:34122101:1 gene:ENSRNOG00000001285.9 transcript:ENSRNOT00000001738.8 gene_biotype:protein_coding transcript_biotype:protein_coding gene_symbol:Atp2a2 description:ATPase sarcoplasmic/endoplasmi	9	45	45	45	48.8	114.77	37229000	37075000	35659000	3.66543e+07	38552000	37861000	39789000	38734000	0.946309	0.0508406
ENSRNOP00000085085	S100 calcium binding protein B	S100b	ENSRNOP00000085085.1;ENSRNOP00000001743.3	ENSRNOP00000085085.1 pep primary_assembly:mRatBN7.2:20:12373163:12394743:-1 gene:ENSRNOG00000001295.3 transcript:ENSRNOT00000096333.1 gene_biotype:protein_coding transcript_biotype:protein_coding gene_symbol:S100b description:S100 calcium binding protein B	2	5	5	5	24.3	20.624	11115000	14974000	20396000	15495000	13994000	19740000	14780000	1.61713e+07	0.958177	0.844728
ENSRNOP00000001745	guided entry of tail-anchored p	Get4	ENSRNOP00000001745.6;ENSRNOP00000088319.1	ENSRNOP00000001745.6 pep primary_assembly:mRatBN7.2:12:15377009:15394053:-1 gene:ENSRNOG00000001293.7 transcript:ENSRNOT00000001745.7 gene_biotype:protein_coding transcript_biotype:protein_coding gene_symbol:Get4 description:guided entry of tail-anchored p	2	5	5	5	23.3	36.752	128510	383930	144770	219070	135480	122900	125700	128027	1.71113	0.332491
ENSRNOP00000001746	purinergic receptor P2X 7	P2rx7	ENSRNOP00000001746.6;ENSRNOP00000097073.1;ENSRNOP00000094617.1;ENSRNOP00000071169.2;ENSRNOP00000087262.1	ENSRNOP00000001746.6 pep primary_assembly:mRatBN7.2:12:33890989:33926169:-1 gene:ENSRNOG00000001296.8 transcript:ENSRNOT00000001746.8 gene_biotype:protein_coding transcript_biotype:protein_coding gene_symbol:P2rx7 description:purinergic receptor P2X 7 [Sou	5	5	5	5	13	70.779	451450	297060	175500	308003	163640	219180	272470	218430	1.41008	0.355466
ENSRNOP00000001766	BCR activator of RhoGEF and GTPa	Bcr	ENSRNOP00000001766.7;ENSRNOP00000091048.1	ENSRNOP00000001766.7 pep primary_assembly:mRatBN7.2:20:13471668:13597016:-1 gene:ENSRNOG00000001304.8 transcript:ENSRNOT00000001766.8 gene_biotype:protein_coding transcript_biotype:protein_coding gene_symbol:Bcr description:BCR activator of RhoGEF and GTPa	2	16	15	15	18.5	143.03	694680	774840	864540	778020	816140	836950	679740	777610	1.00053	0.995579
ENSRNOP00000001774	calcium/calmodulin-dependent p	Camkk2	ENSRNOP00000001774.7	ENSRNOP00000001774.7 pep primary_assembly:mRatBN7.2:12:33791090:33839189:1 gene:ENSRNOG00000001309.7 transcript:ENSRNOT00000001774.7 gene_biotype:protein_coding transcript_biotype:protein_coding gene_symbol:Camkk2 description:calcium/calmodulin-dependent p	1	13	13	0	36.8	59.796	1600500	1754300	1106100	1.48697e+06	1498600	1103400	1384000	1.32867e+06	1.11914	0.525834
ENSRNOP00000001779	G protein subunit alpha z	Gnaz	ENSRNOP00000001779.2	ENSRNOP00000001779.2 pep primary_assembly:mRatBN7.2:20:13644640:13669907:-1 gene:ENSRNOG00000001313.5 transcript:ENSRNOT00000001779.5 gene_biotype:protein_coding transcript_biotype:protein_coding gene_symbol:Gnaz description:G protein subunit alpha z [Sour	1	14	13	13	49.9	40.879	8924000	9262100	9086800	9.09097e+06	9845800	8938000	9377800	9387200	0.968443	0.349254
ENSRNOP00000093508	gap junction protein, gamma 3 [	Gjc3	ENSRNOP00000093508.1;ENSRNOP00000087790.1;ENSRNOP00000081831.1;ENSRNOP00000077521.1;ENSRNOP00000001797.4;ENSRNOP00000078772.1	ENSRNOP00000093508.1 pep primary_assembly:mRatBN7.2:12:16896813:16911087:-1 gene:ENSRNOG00000001329.5 transcript:ENSRNOT00000100826.1 gene_biotype:protein_coding transcript_biotype:protein_coding gene_symbol:Gjc3 description:gap junction protein, gamma 3 [	6	3	3	3	13.6	28.876	1118600	786520	545780	816967	521090	583090	887160	663780	1.23078	0.488294
ENSRNOP00000001799	ring finger protein 34	Rnf34	ENSRNOP00000001799.4;ENSRNOP00000080689.1	ENSRNOP00000001799.4 pep primary_assembly:mRatBN7.2:12:33703676:33724569:-1 gene:ENSRNOG00000001331.6 transcript:ENSRNOT00000001799.6 gene_biotype:protein_coding transcript_biotype:protein_coding gene_symbol:Rnf34 description:ring finger protein 34 [Source	2	1	1	1	3.4	42.68	32587	37678	34108	34791	54567	46878	33326	44923.7	0.774447	0.187978
ENSRNOP00000001820	COP9 signalosome subunit 6	Cops6	ENSRNOP00000001820.4	ENSRNOP00000001820.4 pep primary_assembly:mRatBN7.2:12:17038979:17041818:1 gene:ENSRNOG00000001346.5 transcript:ENSRNOT00000001820.5 gene_biotype:protein_coding transcript_biotype:protein_coding gene_symbol:Cops6 description:COP9 signalosome subunit 6 [Sou	1	16	16	3	52.4	38.071	3190100	3235300	3321200	3.24887e+06	3784100	3341600	3310000	3.47857e+06	0.933967	0.219184
ENSRNOP00000001822	endoplasmic reticulum protein 2	Erp29	ENSRNOP00000001822.3	ENSRNOP00000001822.3 pep primary_assembly:mRatBN7.2:12:35089707:35096376:1 gene:ENSRNOG00000001348.6 transcript:ENSRNOT00000001822.6 gene_biotype:protein_coding transcript_biotype:protein_coding gene_symbol:Erp29 description:endoplasmic reticulum protein 2	1	9	9	9	39.6	28.574	4125300	3746800	4551100	4.14107e+06	4124900	4221600	4225400	4.19063e+06	0.988172	0.843016
ENSRNOP00000001844	rabphilin 3A	Rph3a	ENSRNOP00000001844.5;ENSRNOP00000086545.1;ENSRNOP00000092026.1	ENSRNOP00000001844.5 pep primary_assembly:mRatBN7.2:12:35542728:35617592:1 gene:ENSRNOG00000001368.7 transcript:ENSRNOT00000001844.7 gene_biotype:protein_coding transcript_biotype:protein_coding gene_symbol:Rph3a description:rabphilin 3A [Source:RGD Symbol	3	31	31	30	56.7	75.803	10556000	9594900	5824400	8.65843e+06	7885700	6559900	7778300	7.40797e+06	1.1688	0.452822
ENSRNOP00000001856	RAS protein activator like 1	Rasal1	ENSRNOP00000001856.6	ENSRNOP00000001856.6 pep primary_assembly:mRatBN7.2:12:35881270:35913727:-1 gene:ENSRNOG00000001374.7 transcript:ENSRNOT00000001856.7 gene_biotype:protein_coding transcript_biotype:protein_coding gene_symbol:Rasal1 description:RAS protein activator like 1	1	26	26	26	42.9	89.596	4569400	5465600	6829500	5621500	6595900	6699000	5839000	6.37797e+06	0.881394	0.347204
ENSRNOP00000001882	serine dehydratase-like	Sdsl	ENSRNOP00000001882.8	ENSRNOP00000001882.8 pep primary_assembly:mRatBN7.2:12:36099693:36109906:1 gene:ENSRNOG00000001391.7 transcript:ENSRNOT00000001882.7 gene_biotype:protein_coding transcript_biotype:protein_coding gene_symbol:Sdsl description:serine dehydratase-like [Source:	1	2	2	2	15.1	26.564	115910	217130	104220	145753	358670	232880	224620	272057	0.535746	0.0881677
ENSRNOP00000001911	G protein subunit beta 2	Gnb2	ENSRNOP00000001911.3;ENSRNOP00000078220.1;ENSRNOP00000079960.1;ENSRNOP00000097429.1;ENSRNOP00000079986.1;ENSRNOP00000089310.1;ENSRNOP00000042095.4	ENSRNOP00000001911.3 pep primary_assembly:mRatBN7.2:12:19158973:19164017:1 gene:ENSRNOG00000001409.5 transcript:ENSRNOT00000001911.5 gene_biotype:protein_coding transcript_biotype:protein_coding gene_symbol:Gnb2 description:G protein subunit beta 2 [Source	7	17	17	7	61.2	37.331	79335000	80043000	73534000	7.76373e+07	73300000	70490000	70400000	7.13967e+07	1.08741	0.0514813
ENSRNOP00000001912	GRB10 interacting GYF protein	Gigyf1	ENSRNOP00000001912.4	ENSRNOP00000001912.4 pep primary_assembly:mRatBN7.2:12:19166088:19175023:-1 gene:ENSRNOG00000001410.6 transcript:ENSRNOT00000001912.6 gene_biotype:protein_coding transcript_biotype:protein_coding gene_symbol:Gigyf1 description:GRB10 interacting GYF protein	1	3	3	3	4.5	116.01	87352	82150	72942	80814.7	89597	70203	82046	80615.3	1.00247	0.978777
ENSRNOP00000001924	fission, mitochondrial 1	Fis1	ENSRNOP00000001924.5;ENSRNOP00000086280.1;ENSRNOP00000075023.2;ENSRNOP00000061895.2	ENSRNOP00000001924.5 pep primary_assembly:mRatBN7.2:12:19708567:19712897:-1 gene:ENSRNOG00000001420.9 transcript:ENSRNOT00000001924.9 gene_biotype:protein_coding transcript_biotype:protein_coding gene_symbol:Fis1 description:fission, mitochondrial 1 [Sourc	4	7	7	7	42.8	16.994	2533800	2366600	2557700	2.48603e+06	2333200	2534700	2468500	2.44547e+06	1.01659	0.656016
ENSRNOP00000001954	tyrosine 3-monooxygenase/trypto	Ywhag	ENSRNOP00000001954.2;ENSRNOP00000069671.2	ENSRNOP00000001954.2 pep primary_assembly:mRatBN7.2:12:20744535:20772827:1 gene:ENSRNOG00000001436.6 transcript:ENSRNOT00000001954.4 gene_biotype:protein_coding transcript_biotype:protein_coding gene_symbol:Ywhag description:tyrosine 3-monooxygenase/trypto	2	23	19	16	81	28.302	52839000	51762000	47313000	50638000	48895000	49910000	48370000	4.90583e+07	1.0322	0.417911
ENSRNOP00000090657	malate dehydrogenase 2	Mdh2	ENSRNOP00000090657.1;ENSRNOP00000001958.2	ENSRNOP00000090657.1 pep primary_assembly:mRatBN7.2:12:20894262:20901591:-1 gene:ENSRNOG00000001440.5 transcript:ENSRNOT00000112030.1 gene_biotype:protein_coding transcript_biotype:protein_coding gene_symbol:Mdh2 description:malate dehydrogenase 2 [Source:	2	20	20	20	68.2	34.569	129800000	115210000	156440000	1.33817e+08	129040000	128030000	165950000	1.41007e+08	0.94901	0.699972
ENSRNOP00000085652	transmembrane protein 120A [	Tmem120a	ENSRNOP00000085652.1;ENSRNOP00000001960.5	ENSRNOP00000085652.1 pep primary_assembly:mRatBN7.2:12:20942441:20990316:1 gene:ENSRNOG00000001441.8 transcript:ENSRNOT00000115876.1 gene_biotype:protein_coding transcript_biotype:protein_coding gene_symbol:Tmem120a description:transmembrane protein 120A [	2	3	3	3	10.8	40.657	110320	67249	124490	100686	135330	148400	122940	135557	0.742762	0.135902
ENSRNOP00000081146	cytochrome p450 oxidoreductase [	Por	ENSRNOP00000081146.1;ENSRNOP00000078537.1;ENSRNOP00000001961.3	ENSRNOP00000081146.1 pep primary_assembly:mRatBN7.2:12:20951058:20962132:-1 gene:ENSRNOG00000001442.4 transcript:ENSRNOT00000100114.1 gene_biotype:protein_coding transcript_biotype:protein_coding gene_symbol:Por description:cytochrome p450 oxidoreductase [	3	17	17	17	38.6	71.921	3121300	2819500	2453000	2.79793e+06	2925000	2416200	2798800	2.71333e+06	1.03118	0.748668
ENSRNOP00000001975	bromodomain adjacent to zinc f	Baz1b	ENSRNOP00000001975.6;ENSRNOP00000094596.1	ENSRNOP00000001975.6 pep primary_assembly:mRatBN7.2:12:21431985:21490426:-1 gene:ENSRNOG00000001453.8 transcript:ENSRNOT00000001975.8 gene_biotype:protein_coding transcript_biotype:protein_coding gene_symbol:Baz1b description:bromodomain adjacent to zinc f	2	1	1	1	1.1	166.74	17695	21843	16516	18684.7	26723	27135	21393	25083.7	0.744894	0.0596647
ENSRNOP00000076791	general transcription factor I	Gtf2i	ENSRNOP00000076791.1;ENSRNOP00000040835.2;ENSRNOP00000080788.1;ENSRNOP00000077117.1;ENSRNOP00000095456.1;ENSRNOP00000096595.1;ENSRNOP00000002020.3;ENSRNOP00000075956.2;ENSRNOP00000073166.1	ENSRNOP00000076791.1 pep primary_assembly:mRatBN7.2:12:22401465:22476229:1 gene:ENSRNOG00000001479.10 transcript:ENSRNOT00000099403.1 gene_biotype:protein_coding transcript_biotype:protein_coding gene_symbol:Gtf2i description:general transcription factor I	9	6	6	6	11	102.21	358230	368540	336520	354430	353380	372620	334010	353337	1.00309	0.943917
ENSRNOP00000002044	NSF attachment protein alpha	Napa	ENSRNOP00000002044.5	ENSRNOP00000002044.5 pep primary_assembly:mRatBN7.2:1:76787184:76805869:1 gene:ENSRNOG00000001494.7 transcript:ENSRNOT00000002044.7 gene_biotype:protein_coding transcript_biotype:protein_coding gene_symbol:Napa description:NSF attachment protein alpha [Sou	1	21	18	0	71.1	32.65	16161000	14916000	11419000	1.41653e+07	15798000	11982000	14423000	1.40677e+07	1.00694	0.959454
ENSRNOP00000002052	RAB4B, member RAS oncogene fami	Rab4b	ENSRNOP00000002052.3;ENSRNOP00000090161.1;ENSRNOP00000084856.1	ENSRNOP00000002052.3 pep primary_assembly:mRatBN7.2:1:82461397:82472763:-1 gene:ENSRNOG00000001500.7 transcript:ENSRNOT00000002052.4 gene_biotype:protein_coding transcript_biotype:protein_coding gene_symbol:Rab4b description:RAB4B, member RAS oncogene fami	3	9	9	8	54	23.629	1179200	1354000	1113400	1.21553e+06	1293200	1241500	1237800	1257500	0.966627	0.600877
ENSRNOP00000002053	small nuclear ribonucleoprotein	Snrpa	ENSRNOP00000002053.5	ENSRNOP00000002053.5 pep primary_assembly:mRatBN7.2:1:82481770:82490538:-1 gene:ENSRNOG00000001501.5 transcript:ENSRNOT00000002053.5 gene_biotype:protein_coding transcript_biotype:protein_coding gene_symbol:Snrpa description:small nuclear ribonucleoprotein	1	2	2	2	13.2	31.176	338530	309710	264600	304280	311250	262660	249590	274500	1.10849	0.355699
ENSRNOP00000002058	transmembrane protein 35A	Tmem35a	ENSRNOP00000002058.3	ENSRNOP00000002058.3 pep primary_assembly:mRatBN7.2:X:97503350:97514197:1 gene:ENSRNOG00000001506.5 transcript:ENSRNOT00000002058.5 gene_biotype:protein_coding transcript_biotype:protein_coding gene_symbol:Tmem35a description:transmembrane protein 35A [Sou	1	2	2	2	14.4	18.473	785000	774470	2083400	1214290	1156700	1443800	1200900	1.26713e+06	0.958297	0.910927
ENSRNOP00000097986	pyruvate dehydrogenase kinase 1 [	Pdk1	ENSRNOP00000097986.1;ENSRNOP00000002072.7	ENSRNOP00000097986.1 pep primary_assembly:mRatBN7.2:3:56705871:56733038:1 gene:ENSRNOG00000001517.7 transcript:ENSRNOT00000115755.1 gene_biotype:protein_coding transcript_biotype:protein_coding gene_symbol:Pdk1 description:pyruvate dehydrogenase kinase 1 [	2	7	7	7	27.5	45.971	628670	602750	1060000	763807	832240	857240	639280	776253	0.983966	0.942973
ENSRNOP00000082677	integrin subunit alpha 6	Itga6	ENSRNOP00000082677.1;ENSRNOP00000002075.3;ENSRNOP00000094358.1;ENSRNOP00000087175.1	ENSRNOP00000082677.1 pep primary_assembly:mRatBN7.2:3:56617268:56689428:1 gene:ENSRNOG00000001518.8 transcript:ENSRNOT00000107088.1 gene_biotype:protein_coding transcript_biotype:protein_coding gene_symbol:Itga6 description:integrin subunit alpha 6 [Source	4	6	6	6	7.9	118.27	267210	394430	325550	329063	441330	377470	313050	377283	0.872192	0.407762
ENSRNOP00000002091	growth associated protein 43	Gap43	ENSRNOP00000002091.3	ENSRNOP00000002091.3 pep primary_assembly:mRatBN7.2:11:58376371:58470045:1 gene:ENSRNOG00000001528.6 transcript:ENSRNOT00000002091.5 gene_biotype:protein_coding transcript_biotype:protein_coding gene_symbol:Gap43 description:growth associated protein 43 [S	1	16	16	16	74.3	23.603	17539000	18040000	26491000	20690000	18915000	26709000	19595000	2.17397e+07	0.951717	0.797452
ENSRNOP00000079560	alkylglycerone phosphate synthase	Agps	ENSRNOP00000079560.1;ENSRNOP00000002111.6;ENSRNOP00000095474.1	ENSRNOP00000079560.1 pep primary_assembly:mRatBN7.2:3:60747323:60845830:1 gene:ENSRNOG00000001547.6 transcript:ENSRNOT00000096806.1 gene_biotype:protein_coding transcript_biotype:protein_coding gene_symbol:Agps description:alkylglycerone phosphate synthase	3	7	7	7	20.6	74.113	72931	76778	62541	70750	75075	70039	84489	76534.3	0.924422	0.389688
ENSRNOP00000002116	ATP synthase peripheral stalk	Atp5pf	ENSRNOP00000002116.3	ENSRNOP00000002116.3 pep primary_assembly:mRatBN7.2:11:23881592:23889119:-1 gene:ENSRNOG00000001551.5 transcript:ENSRNOT00000002116.5 gene_biotype:protein_coding transcript_biotype:protein_coding gene_symbol:Atp5pf description:ATP synthase peripheral stalk	1	8	8	8	28.2	19.292	9056800	10002000	13134000	1.07309e+07	13139000	12780000	11423000	1.24473e+07	0.862107	0.268953
ENSRNOP00000095766	metaxin 2	Mtx2	ENSRNOP00000095766.1;ENSRNOP00000002134.4;ENSRNOP00000084209.1;ENSRNOP00000078996.1;ENSRNOP00000082118.1	ENSRNOP00000095766.1 pep primary_assembly:mRatBN7.2:3:59730246:59792200:1 gene:ENSRNOG00000001559.6 transcript:ENSRNOT00000097639.1 gene_biotype:protein_coding transcript_biotype:protein_coding gene_symbol:Mtx2 description:metaxin 2 [Source:RGD Symbol;Acc:	5	7	7	7	31.3	29.903	1747000	1703300	2038400	1.82957e+06	1497000	1800000	1817000	1.70467e+06	1.07327	0.445878
ENSRNOP00000071094	ubiquitin specific peptidase 25	Usp25	ENSRNOP00000071094.2;ENSRNOP00000002150.4;ENSRNOP00000080323.1	ENSRNOP00000071094.2 pep primary_assembly:mRatBN7.2:11:15624409:15711348:1 gene:ENSRNOG00000001573.8 transcript:ENSRNOT00000084928.2 gene_biotype:protein_coding transcript_biotype:protein_coding gene_symbol:Usp25 description:ubiquitin specific peptidase 25	3	3	3	3	4.5	119.33	133180	113640	129850	125557	105820	81181	105710	97570.3	1.28683	0.0513822
ENSRNOP00000002169	chaperonin containing TCP1 subu	Cct8	ENSRNOP00000002169.4;ENSRNOP00000082722.1;ENSRNOP00000088403.1	ENSRNOP00000002169.4 pep primary_assembly:mRatBN7.2:11:26710370:26722079:-1 gene:ENSRNOG00000001592.7 transcript:ENSRNOT00000002169.7 gene_biotype:protein_coding transcript_biotype:protein_coding gene_symbol:Cct8 description:chaperonin containing TCP1 subu	3	30	30	30	63.9	59.588	18588000	17244000	18585000	18139000	16673000	17552000	18479000	17568000	1.0325	0.452692
ENSRNOP00000002191	centrosomal protein 97	Cep97	ENSRNOP00000002191.2	ENSRNOP00000002191.2 pep primary_assembly:mRatBN7.2:11:44683517:44711471:1 gene:ENSRNOG00000001609.8 transcript:ENSRNOT00000002191.5 gene_biotype:protein_coding transcript_biotype:protein_coding gene_symbol:Cep97 description:centrosomal protein 97 [Source:	1	1	1	1	2.2	94.194	34810	34458	25666	31644.7	33803	29996	26990	30263	1.04566	0.719353
ENSRNOP00000002194	ribosomal protein L24	Rpl24	ENSRNOP00000002194.7;ENSRNOP00000080524.1;ENSRNOP00000066863.3;ENSRNOP00000092817.1;ENSRNOP00000080069.1	ENSRNOP00000002194.7 pep primary_assembly:mRatBN7.2:11:44653937:44659346:-1 gene:ENSRNOG00000001611.8 transcript:ENSRNOT00000002194.8 gene_biotype:protein_coding transcript_biotype:protein_coding gene_symbol:Rpl24 description:ribosomal protein L24 [Source:	5	6	6	5	31.8	17.779	1986700	1567700	1899300	1817900	1667000	1542900	129520	1113140	1.63313	0.238678
ENSRNOP00000002198	tRNA methyltransferase 10C, m	Trmt10c	ENSRNOP00000002198.3	ENSRNOP00000002198.3 pep primary_assembly:mRatBN7.2:11:44584113:44589568:1 gene:ENSRNOG00000039567.4 transcript:ENSRNOT00000002198.6 gene_biotype:protein_coding transcript_biotype:protein_coding gene_symbol:Trmt10c description:tRNA methyltransferase 10C, m	1	3	3	3	8.5	48.292	86796	91800	130210	102935	99323	101410	106990	102574	1.00352	0.980529
ENSRNOP00000082469	Purkinje cell protein 4	Pcp4	ENSRNOP00000082469.1;ENSRNOP00000057764.2;ENSRNOP00000085635.1;ENSRNOP00000002221.5	ENSRNOP00000082469.1 pep primary_assembly:mRatBN7.2:11:35829648:35861725:1 gene:ENSRNOG00000001628.7 transcript:ENSRNOT00000105621.1 gene_biotype:protein_coding transcript_biotype:protein_coding gene_symbol:Pcp4 description:Purkinje cell protein 4 [Source:	4	3	3	3	44.3	6.6352	1058400	972080	1728100	1252860	1651200	1279500	699950	1.21022e+06	1.03524	0.912776
ENSRNOP00000002238	translocase of outer mitochon	Tomm70	ENSRNOP00000002238.6	ENSRNOP00000002238.6 pep primary_assembly:mRatBN7.2:11:43377216:43417202:-1 gene:ENSRNOG00000001640.7 transcript:ENSRNOT00000002238.7 gene_biotype:protein_coding transcript_biotype:protein_coding gene_symbol:Tomm70 description:translocase of outer mitochon	1	31	31	31	67	67.444	16643000	15446000	16641000	1.62433e+07	16908000	16048000	16575000	1.65103e+07	0.983828	0.600914
ENSRNOP00000077180	TBC1 domain family, member 23	Tbc1d23	ENSRNOP00000077180.1;ENSRNOP00000089797.1;ENSRNOP00000002240.6	ENSRNOP00000077180.1 pep primary_assembly:mRatBN7.2:11:43318442:43361503:1 gene:ENSRNOG00000001642.8 transcript:ENSRNOT00000106080.1 gene_biotype:protein_coding transcript_biotype:protein_coding gene_symbol:Tbc1d23 description:TBC1 domain family, member 23	3	3	3	3	7.5	76.498	71159	118500	45584	78414.3	367860	110400	58347	178869	0.43839	0.363447
ENSRNOP00000002242	proteasome assembly chaperone	Psmg1	ENSRNOP00000002242.7;ENSRNOP00000085876.1	ENSRNOP00000002242.7 pep primary_assembly:mRatBN7.2:11:35276086:35285596:-1 gene:ENSRNOG00000001643.8 transcript:ENSRNOT00000002242.8 gene_biotype:protein_coding transcript_biotype:protein_coding gene_symbol:Psmg1 description:proteasome assembly chaperone	2	3	3	3	16.4	30.708	204070	196570	235180	211940	217990	243810	210170	223990	0.946203	0.482672
ENSRNOP00000002257	coproporphyrinogen oxidase	Cpox	ENSRNOP00000002257.5	ENSRNOP00000002257.5 pep primary_assembly:mRatBN7.2:11:41936591:41946746:-1 gene:ENSRNOG00000001654.7 transcript:ENSRNOT00000002257.7 gene_biotype:protein_coding transcript_biotype:protein_coding gene_symbol:Cpox description:coproporphyrinogen oxidase [Sou	1	2	2	2	4.5	49.221	52344	67757	46554	55551.7	77645	59911	73734	70430	0.78875	0.147694
ENSRNOP00000002260	claudin domain containing 1 [	Cldnd1	ENSRNOP00000002260.3	ENSRNOP00000002260.3 pep primary_assembly:mRatBN7.2:11:41883134:41889354:-1 gene:ENSRNOG00000001657.6 transcript:ENSRNOT00000002260.5 gene_biotype:protein_coding transcript_biotype:protein_coding gene_symbol:Cldnd1 description:claudin domain containing 1 [	1	3	3	3	13	28.488	165690	164910	155310	161970	96498	140560	186010	141023	1.14854	0.466487
ENSRNOP00000002284	VPS26 endosomal protein sorti	Vps26c	ENSRNOP00000002284.6;ENSRNOP00000088004.1;ENSRNOP00000088383.1;ENSRNOP00000096938.1	ENSRNOP00000002284.6 pep primary_assembly:mRatBN7.2:11:33814136:33841447:-1 gene:ENSRNOG00000001681.7 transcript:ENSRNOT00000002284.7 gene_biotype:protein_coding transcript_biotype:protein_coding gene_symbol:Vps26c description:VPS26 endosomal protein sorti	4	6	6	6	26.9	32.936	560200	530370	524960	538510	536750	541470	575460	551227	0.97693	0.481209
ENSRNOP00000002310	carbonyl reductase 3	Cbr3	ENSRNOP00000002310.4	ENSRNOP00000002310.4 pep primary_assembly:mRatBN7.2:11:33008615:33016875:1 gene:ENSRNOG00000001701.7 transcript:ENSRNOT00000002310.7 gene_biotype:protein_coding transcript_biotype:protein_coding gene_symbol:Cbr3 description:carbonyl reductase 3 [Source:RGD	1	3	2	2	13.4	30.841	125880	126330	72104	108105	100410	104320	122530	109087	0.990998	0.961757
ENSRNOP00000002321	eukaryotic translation initia	Eif2b5	ENSRNOP00000002321.2	ENSRNOP00000002321.2 pep primary_assembly:mRatBN7.2:11:80394433:80404419:-1 gene:ENSRNOG00000038160.2 transcript:ENSRNOT00000002321.4 gene_biotype:protein_coding transcript_biotype:protein_coding gene_symbol:Eif2b5 description:eukaryotic translation initia	1	7	7	7	16.6	80.205	238760	273500	252180	254813	244910	296780	265180	268957	0.947414	0.479772
ENSRNOP00000002356	xyloside xylosyltransferase 1	Xxylt1	ENSRNOP00000002356.4	ENSRNOP00000002356.4 pep primary_assembly:mRatBN7.2:11:69658460:69790730:1 gene:ENSRNOG00000001729.6 transcript:ENSRNOT00000002356.6 gene_biotype:protein_coding transcript_biotype:protein_coding gene_symbol:Xxylt1 description:xyloside xylosyltransferase 1	1	1	1	1	3.1	43.912	8554.8		9935	9244.9	9419.3	8665.2		9042.25	1.02241	0.820732
ENSRNOP00000002358	proteasome 26S subunit, non-AT	Psmd2	ENSRNOP00000002358.4	ENSRNOP00000002358.4 pep primary_assembly:mRatBN7.2:11:80248364:80259043:-1 gene:ENSRNOG00000001719.7 transcript:ENSRNOT00000002358.7 gene_biotype:protein_coding transcript_biotype:protein_coding gene_symbol:Psmd2 description:proteasome 26S subunit, non-AT	1	30	30	30	42.7	100.19	7676700	7722000	7508400	7635700	7956500	7648400	7690000	7.76497e+06	0.983353	0.328849
ENSRNOP00000002361	protein phosphatase 1, regulat	Ppp1r2	ENSRNOP00000002361.6;ENSRNOP00000094675.1	ENSRNOP00000002361.6 pep primary_assembly:mRatBN7.2:11:69472555:69494463:1 gene:ENSRNOG00000001733.8 transcript:ENSRNOT00000002361.7 gene_biotype:protein_coding transcript_biotype:protein_coding gene_symbol:Ppp1r2 description:protein phosphatase 1, regulat	2	7	7	7	41	23.071	594730	738600	591130	641487	760010	683250	678700	707320	0.906926	0.299442
ENSRNOP00000002366	3-hydroxybutyrate dehydrogenase	Bdh1	ENSRNOP00000002366.3	ENSRNOP00000002366.3 pep primary_assembly:mRatBN7.2:11:69302534:69337671:-1 gene:ENSRNOG00000001736.6 transcript:ENSRNOT00000002366.6 gene_biotype:protein_coding transcript_biotype:protein_coding gene_symbol:Bdh1 description:3-hydroxybutyrate dehydrogenase	1	14	14	14	55.5	38.333	3505600	3696900	3285700	3.49607e+06	4011400	3405900	3155500	3.52427e+06	0.991998	0.924749
ENSRNOP00000066677	nuclear cap binding protein su	Ncbp2	ENSRNOP00000066677.2;ENSRNOP00000002381.5	ENSRNOP00000066677.2 pep primary_assembly:mRatBN7.2:11:68817740:68829886:-1 gene:ENSRNOG00000001746.7 transcript:ENSRNOT00000071483.2 gene_biotype:protein_coding transcript_biotype:protein_coding gene_symbol:Ncbp2 description:nuclear cap binding protein su	2	1	1	1	7.2	17.78	33802	26719	61242	40587.7		56688	58590	57639	0.70417	0.299012
ENSRNOP00000002382	RNA polymerase II, I and III	Polr2h	ENSRNOP00000002382.4;ENSRNOP00000077474.1;ENSRNOP00000084260.1	ENSRNOP00000002382.4 pep primary_assembly:mRatBN7.2:11:80192032:80197515:-1 gene:ENSRNOG00000001748.6 transcript:ENSRNOT00000002382.6 gene_biotype:protein_coding transcript_biotype:protein_coding gene_symbol:Polr2h description:RNA polymerase II, I and III	3	2	2	2	19.3	17.143	78632	103430	116220	99427.3	98165	100460	86186	94937	1.0473	0.724829
ENSRNOP00000002403	phosphate cytidylyltransferas	Pcyt1a	ENSRNOP00000002403.3;ENSRNOP00000077206.1;ENSRNOP00000068408.1;ENSRNOP00000016669.4	ENSRNOP00000002403.3 pep primary_assembly:mRatBN7.2:11:68313882:68357357:-1 gene:ENSRNOG00000001762.4 transcript:ENSRNOT00000002403.4 gene_biotype:protein_coding transcript_biotype:protein_coding gene_symbol:Pcyt1a description:phosphate cytidylyltransferas	4	4	4	4	14.4	41.68	100420	162540	154450	139137	156920	206360	126010	163097	0.853093	0.475485
ENSRNOP00000002407	transferrin receptor	Tfrc	ENSRNOP00000002407.3;ENSRNOP00000097197.1	ENSRNOP00000002407.3 pep primary_assembly:mRatBN7.2:11:68163413:68185257:-1 gene:ENSRNOG00000001766.8 transcript:ENSRNOT00000002407.6 gene_biotype:protein_coding transcript_biotype:protein_coding gene_symbol:Tfrc description:transferrin receptor [Source:RG	2	15	15	15	28	85.875	781060	1052000	869130	900730	970910	751720	848230	856953	1.05108	0.689698
ENSRNOP00000095605	transformer 2 beta homolog	Tra2b	ENSRNOP00000095605.1;ENSRNOP00000076861.1;ENSRNOP00000002429.4;ENSRNOP00000090139.1	ENSRNOP00000095605.1 pep primary_assembly:mRatBN7.2:11:78788906:78807123:1 gene:ENSRNOG00000001783.7 transcript:ENSRNOT00000102904.1 gene_biotype:protein_coding transcript_biotype:protein_coding gene_symbol:Tra2b description:transformer 2 beta homolog [Sou	4	4	4	4	32.4	21.935	1087400	1145000	1261900	1.16477e+06	709250	1028500	900550	879433	1.32445	0.0545823
ENSRNOP00000002432	sorting nexin 4	Snx4	ENSRNOP00000002432.6;ENSRNOP00000088239.1	ENSRNOP00000002432.6 pep primary_assembly:mRatBN7.2:11:67460870:67518174:-1 gene:ENSRNOG00000001786.7 transcript:ENSRNOT00000002432.7 gene_biotype:protein_coding transcript_biotype:protein_coding gene_symbol:Snx4 description:sorting nexin 4 [Source:RGD Sym	2	11	11	11	29.3	51.629	1270800	1298700	1132400	1.23397e+06	1417100	1307400	1216900	1313800	0.939235	0.360733
ENSRNOP00000002452	diacylglycerol kinase, gamma	Dgkg	ENSRNOP00000002452.5;ENSRNOP00000088510.1;ENSRNOP00000094936.1	ENSRNOP00000002452.5 pep primary_assembly:mRatBN7.2:11:78384458:78577212:1 gene:ENSRNOG00000001796.7 transcript:ENSRNOT00000002452.6 gene_biotype:protein_coding transcript_biotype:protein_coding gene_symbol:Dgkg description:diacylglycerol kinase, gamma [So	3	22	22	22	42.5	88.521	2066400	2652700	4474500	3.06453e+06	3784800	4033400	3036200	3.61813e+06	0.846993	0.519326
ENSRNOP00000084289	DnaJ heat shock protein fami	Dnajb11	ENSRNOP00000084289.1;ENSRNOP00000090058.1;ENSRNOP00000002462.5;ENSRNOP00000084615.1	ENSRNOP00000084289.1 pep primary_assembly:mRatBN7.2:11:78150429:78180407:-1 gene:ENSRNOG00000001803.7 transcript:ENSRNOT00000101863.1 gene_biotype:protein_coding transcript_biotype:protein_coding gene_symbol:Dnajb11 description:DnaJ heat shock protein fami	4	6	6	6	19.9	38.378	901050	956360	876240	911217	876920	924610	935890	912473	0.998623	0.968373
ENSRNOP00000002476	FGFR1 oncogene partner 2	Fgfr1op2	ENSRNOP00000002476.2;ENSRNOP00000039568.3	ENSRNOP00000002476.2 pep primary_assembly:mRatBN7.2:4:179491643:179512630:1 gene:ENSRNOG00000001811.7 transcript:ENSRNOT00000002476.6 gene_biotype:protein_coding transcript_biotype:protein_coding gene_symbol:Fgfr1op2 description:FGFR1 oncogene partner 2 [S	2	2	2	2	16.7	24.95	47633	50044	51415	49697.3	68821	38261	46083	51055	0.973408	0.890197
ENSRNOP00000002478	dynamin 1-like	Dnm1l	ENSRNOP00000002478.5;ENSRNOP00000078603.1;ENSRNOP00000090570.1;ENSRNOP00000079426.1;ENSRNOP00000077784.1	ENSRNOP00000002478.5 pep primary_assembly:mRatBN7.2:11:84581311:84630573:1 gene:ENSRNOG00000001813.9 transcript:ENSRNOT00000002478.8 gene_biotype:protein_coding transcript_biotype:protein_coding gene_symbol:Dnm1l description:dynamin 1-like [Source:RGD Symb	5	42	42	3	69.5	83.907	21911000	22322000	22604000	22279000	23356000	23783000	22568000	2.32357e+07	0.958828	0.0793651
ENSRNOP00000002482	dynamin 1-like	Dnm1l	ENSRNOP00000002482.6	ENSRNOP00000002482.6 pep primary_assembly:mRatBN7.2:11:84581286:84631470:1 gene:ENSRNOG00000001813.9 transcript:ENSRNOT00000002482.8 gene_biotype:protein_coding transcript_biotype:protein_coding gene_symbol:Dnm1l description:dynamin 1-like [Source:RGD Symb	1	39	1	0	68.9	81.017	63492	54718	70594	62934.7	67387	85092	85115	79198	0.79465	0.0953692
ENSRNOP00000002502	serine/threonine kinase 38 li	Stk38l	ENSRNOP00000002502.6;ENSRNOP00000068621.2;ENSRNOP00000083335.1;ENSRNOP00000094365.1	ENSRNOP00000002502.6 pep primary_assembly:mRatBN7.2:4:179634275:179690972:1 gene:ENSRNOG00000001828.8 transcript:ENSRNOT00000002502.8 gene_biotype:protein_coding transcript_biotype:protein_coding gene_symbol:Stk38l description:serine/threonine kinase 38 li	4	6	6	5	18.8	53.758	432550	519100	545980	499210	562940	600930	479140	547670	0.911516	0.384344
ENSRNOP00000002519	somatostatin	Sst	ENSRNOP00000002519.1	ENSRNOP00000002519.1 pep primary_assembly:mRatBN7.2:11:76956896:76958173:1 gene:ENSRNOG00000001837.4 transcript:ENSRNOT00000002519.4 gene_biotype:protein_coding transcript_biotype:protein_coding gene_symbol:Sst description:somatostatin [Source:RGD Symbol;A	1	1	1	1	9.5	12.745	22241	16961	57814	32338.7	28714	53962	54209	45628.3	0.708741	0.43588
ENSRNOP00000002530	protein phosphatase, Mg2+/Mn2+	Ppm1f	ENSRNOP00000002530.3;ENSRNOP00000084851.1	ENSRNOP00000002530.3 pep primary_assembly:mRatBN7.2:11:84064420:84094340:-1 gene:ENSRNOG00000037909.3 transcript:ENSRNOT00000002530.6 gene_biotype:protein_coding transcript_biotype:protein_coding gene_symbol:Ppm1f description:protein phosphatase, Mg2+/Mn2+	2	10	10	10	37.3	49.165	895990	1051400	1046900	998097	896270	968860	879300	914810	1.09104	0.224266
ENSRNOP00000002533	mitogen activated protein kina	Mapk1	ENSRNOP00000002533.6;ENSRNOP00000086878.1	ENSRNOP00000002533.6 pep primary_assembly:mRatBN7.2:11:83957813:84023616:-1 gene:ENSRNOG00000001849.8 transcript:ENSRNOT00000002533.8 gene_biotype:protein_coding transcript_biotype:protein_coding gene_symbol:Mapk1 description:mitogen activated protein kina	2	22	22	17	72.9	41.275	23280000	25928000	26629000	25279000	25521000	28123000	25306000	2.63167e+07	0.96057	0.489074
ENSRNOP00000002540	stromal cell-derived factor 2-	Sdf2l1	ENSRNOP00000002540.4	ENSRNOP00000002540.4 pep primary_assembly:mRatBN7.2:11:83872659:83874902:1 gene:ENSRNOG00000001859.6 transcript:ENSRNOT00000002540.6 gene_biotype:protein_coding transcript_biotype:protein_coding gene_symbol:Sdf2l1 description:stromal cell-derived factor 2-	1	2	2	2	20	23.403	39231		11226	25228.5	59817	74926		67371.5	0.374468	0.117859
ENSRNOP00000002550	synaptosome associated protei	Snap29	ENSRNOP00000002550.5	ENSRNOP00000002550.5 pep primary_assembly:mRatBN7.2:11:83578489:83608958:-1 gene:ENSRNOG00000001867.8 transcript:ENSRNOT00000002550.8 gene_biotype:protein_coding transcript_biotype:protein_coding gene_symbol:Snap29 description:synaptosome associated protei	1	4	4	4	24.8	29.255	189930	204660	239070	211220	224900	273080	242520	246833	0.855719	0.153459
ENSRNOP00000002552	CRK like proto-oncogene, adapto	Crkl	ENSRNOP00000002552.4;ENSRNOP00000096058.1	ENSRNOP00000002552.4 pep primary_assembly:mRatBN7.2:11:83526530:83563181:-1 gene:ENSRNOG00000001868.7 transcript:ENSRNOT00000002552.6 gene_biotype:protein_coding transcript_biotype:protein_coding gene_symbol:Crkl description:CRK like proto-oncogene, adapto	2	11	11	10	51.5	33.865	851780	858610	933300	881230	792430	955880	868460	872257	1.01029	0.87599
ENSRNOP00000076809	leucine-zipper-like transcript	Lztr1	ENSRNOP00000076809.1;ENSRNOP00000082766.1;ENSRNOP00000002554.5	ENSRNOP00000076809.1 pep primary_assembly:mRatBN7.2:11:83487717:83503633:-1 gene:ENSRNOG00000001870.7 transcript:ENSRNOT00000109441.1 gene_biotype:protein_coding transcript_biotype:protein_coding gene_symbol:Lztr1 description:leucine-zipper-like transcript	3	1	1	1	1.8	92.135	35746	39380	47652	40926	32971	23920	29413	28768	1.42262	0.0506134
ENSRNOP00000002576	proline dehydrogenase 1	Prodh1	ENSRNOP00000002576.7;ENSRNOP00000072350.2	ENSRNOP00000002576.7 pep primary_assembly:mRatBN7.2:11:82910137:82927305:1 gene:ENSRNOG00000000281.8 transcript:ENSRNOT00000002576.8 gene_biotype:protein_coding transcript_biotype:protein_coding gene_symbol:Prodh1 description:proline dehydrogenase 1 [Sourc	2	11	11	11	30.9	68.105	1167000	1056700	939610	1.05444e+06	967170	730600	902770	866847	1.21641	0.123583
ENSRNOP00000002579	RAN binding protein 1	Ranbp1	ENSRNOP00000002579.5	ENSRNOP00000002579.5 pep primary_assembly:mRatBN7.2:11:82742600:82750833:1 gene:ENSRNOG00000001884.6 transcript:ENSRNOT00000002579.6 gene_biotype:protein_coding transcript_biotype:protein_coding gene_symbol:Ranbp1 description:RAN binding protein 1 [Source:	1	5	1	1	52.1	22.234	440450	38862	74602	184638		809760	32803	421282	0.438277	0.529255
ENSRNOP00000002593	thioredoxin reductase 2	Txnrd2	ENSRNOP00000002593.7	ENSRNOP00000002593.7 pep primary_assembly:mRatBN7.2:11:82519999:82568156:-1 gene:ENSRNOG00000001890.8 transcript:ENSRNOT00000002593.8 gene_biotype:protein_coding transcript_biotype:protein_coding gene_symbol:Txnrd2 description:thioredoxin reductase 2 [Sour	1	10	10	10	30	56.574	1761400	1492900	1625700	1.62667e+06	1637800	1170900	1643800	1.48417e+06	1.09601	0.460635
ENSRNOP00000002638	SCY1 like pseudokinase 2	Scyl2	ENSRNOP00000002638.5;ENSRNOP00000091677.1;ENSRNOP00000069426.1	ENSRNOP00000002638.5 pep primary_assembly:mRatBN7.2:7:24064404:24117305:-1 gene:ENSRNOG00000024955.7 transcript:ENSRNOT00000002638.8 gene_biotype:protein_coding transcript_biotype:protein_coding gene_symbol:Scyl2 description:SCY1 like pseudokinase 2 [Sourc	3	10	10	10	16.2	103.36	515640	541660	564690	540663	598130	631020	535990	588380	0.918902	0.20158
ENSRNOP00000002645	interleukin 1 receptor access	Il1rap	ENSRNOP00000002645.3;ENSRNOP00000090112.1;ENSRNOP00000051260.4	ENSRNOP00000002645.3 pep primary_assembly:mRatBN7.2:11:74078061:74199449:-1 gene:ENSRNOG00000001928.9 transcript:ENSRNOT00000002645.5 gene_biotype:protein_coding transcript_biotype:protein_coding gene_symbol:Il1rap description:interleukin 1 receptor access	3	3	3	3	7.4	65.565	241110	281230	113070	211803	190850	167130	114130	157370	1.34589	0.382598
ENSRNOP00000002650	fibroblast growth factor 12	Fgf12	ENSRNOP00000002650.2;ENSRNOP00000085066.1;ENSRNOP00000066842.2;ENSRNOP00000042838.5;ENSRNOP00000088042.1	ENSRNOP00000002650.2 pep primary_assembly:mRatBN7.2:11:71997099:72562607:1 gene:ENSRNOG00000001931.8 transcript:ENSRNOT00000002650.5 gene_biotype:protein_coding transcript_biotype:protein_coding gene_symbol:Fgf12 description:fibroblast growth factor 12 [So	5	3	3	3	25.4	20.424	246270	247360	246310	246647	303420	256320	250960	270233	0.912717	0.229988
ENSRNOP00000002715	regulator of calcineurin 1	Rcan1	ENSRNOP00000002715.4;ENSRNOP00000084872.1;ENSRNOP00000092573.1	ENSRNOP00000002715.4 pep primary_assembly:mRatBN7.2:11:31622210:31632350:-1 gene:ENSRNOG00000001979.8 transcript:ENSRNOT00000002715.7 gene_biotype:protein_coding transcript_biotype:protein_coding gene_symbol:Rcan1 description:regulator of calcineurin 1 [So	3	2	2	2	15.6	22.948	171000	179460	118980	156480	185250	127550	159350	157383	0.99426	0.973141
ENSRNOP00000002727	ATPase H+ transporting V1 sub	Atp6v1a	ENSRNOP00000002727.6;ENSRNOP00000076121.2	ENSRNOP00000002727.6 pep primary_assembly:mRatBN7.2:11:56560974:56614691:1 gene:ENSRNOG00000001992.7 transcript:ENSRNOT00000002727.6 gene_biotype:protein_coding transcript_biotype:protein_coding gene_symbol:Atp6v1a description:ATPase H+ transporting V1 sub	2	47	47	47	84.4	71.4	93430000	94437000	96857000	94908000	98235000	101450000	90581000	9.67553e+07	0.980907	0.613772
ENSRNOP00000002732	ATP synthase peripheral stalk	Atp5po	ENSRNOP00000002732.3;ENSRNOP00000079398.1	ENSRNOP00000002732.3 pep primary_assembly:mRatBN7.2:11:31165226:31171592:-1 gene:ENSRNOG00000001991.8 transcript:ENSRNOT00000002732.7 gene_biotype:protein_coding transcript_biotype:protein_coding gene_symbol:Atp5po description:ATP synthase peripheral stalk	2	16	16	16	75.6	23.397	25408000	26754000	25640000	25934000	29292000	26981000	25547000	2.72733e+07	0.950892	0.315204
ENSRNOP00000002738	activated leukocyte cell adhesi	Alcam	ENSRNOP00000002738.5;ENSRNOP00000080494.1	ENSRNOP00000002738.5 pep primary_assembly:mRatBN7.2:11:48336169:48537016:1 gene:ENSRNOG00000001989.7 transcript:ENSRNOT00000002738.6 gene_biotype:protein_coding transcript_biotype:protein_coding gene_symbol:Alcam description:activated leukocyte cell adhesi	2	23	23	23	49.1	63.567	5625600	5068500	7516700	6.07027e+06	5928500	6578200	5860500	6122400	0.991485	0.949621
ENSRNOP00000087454	SON DNA and RNA binding protein [	Son	ENSRNOP00000087454.1;ENSRNOP00000044186.4;ENSRNOP00000089452.1;ENSRNOP00000094650.1;ENSRNOP00000002769.6;ENSRNOP00000096891.1	ENSRNOP00000087454.1 pep primary_assembly:mRatBN7.2:11:30892005:30907475:1 gene:ENSRNOG00000002021.9 transcript:ENSRNOT00000108078.1 gene_biotype:protein_coding transcript_biotype:protein_coding gene_symbol:Son description:SON DNA and RNA binding protein [	6	4	4	4	2.4	230.49	73149	58621	60861	64210.3	62401	29808	42844	45017.7	1.42634	0.141372
ENSRNOP00000002775	transmembrane protein 50B	Tmem50b	ENSRNOP00000002775.5	ENSRNOP00000002775.5 pep primary_assembly:mRatBN7.2:11:30804837:30837661:-1 gene:ENSRNOG00000002028.6 transcript:ENSRNOT00000002775.6 gene_biotype:protein_coding transcript_biotype:protein_coding gene_symbol:Tmem50b description:transmembrane protein 50B [S	1	3	3	3	19.6	17.948	614090	577010	512980	568027	606510	737510	495860	613293	0.926191	0.582677
ENSRNOP00000043926	EPH receptor A5	Epha5	ENSRNOP00000043926.4;ENSRNOP00000062326.3;ENSRNOP00000085420.1;ENSRNOP00000002793.4	ENSRNOP00000043926.4 pep primary_assembly:mRatBN7.2:14:23653393:24017317:1 gene:ENSRNOG00000002024.9 transcript:ENSRNOT00000043938.6 gene_biotype:protein_coding transcript_biotype:protein_coding gene_symbol:Epha5 description:EPH receptor A5 [Source:RGD Sym	4	9	6	4	14.4	97.035	432270	436720	284300	384430	401590	295660	320700	339317	1.13295	0.489949
ENSRNOP00000070016	mitochondrial ribosomal protei	Mrpl1	ENSRNOP00000070016.2;ENSRNOP00000036682.7;ENSRNOP00000002834.7;ENSRNOP00000069244.2	ENSRNOP00000070016.2 pep primary_assembly:mRatBN7.2:14:13300522:13351447:-1 gene:ENSRNOG00000002070.8 transcript:ENSRNOT00000085278.2 gene_biotype:protein_coding transcript_biotype:protein_coding gene_symbol:Mrpl1 description:mitochondrial ribosomal protei	4	3	3	3	14.3	33.934	425870	445570	514110	461850	519160	457250	447140	474517	0.973306	0.735414
ENSRNOP00000080661	ubiquitin specific peptidase 46	Usp46	ENSRNOP00000080661.1;ENSRNOP00000080787.1;ENSRNOP00000072387.2;ENSRNOP00000002879.6;ENSRNOP00000086106.1	ENSRNOP00000080661.1 pep primary_assembly:mRatBN7.2:14:34150131:34219227:1 gene:ENSRNOG00000002106.8 transcript:ENSRNOT00000112025.1 gene_biotype:protein_coding transcript_biotype:protein_coding gene_symbol:Usp46 description:ubiquitin specific peptidase 46	5	6	6	3	24.8	39.472	819880	813870	845440	826397	1004200	898640	875230	926023	0.892415	0.0712141
ENSRNOP00000002881	SR-related CTD-associated fact	Scaf4	ENSRNOP00000002881.7;ENSRNOP00000047258.5;ENSRNOP00000078015.1;ENSRNOP00000087677.1;ENSRNOP00000073484.2;ENSRNOP00000062541.4	ENSRNOP00000002881.7 pep primary_assembly:mRatBN7.2:11:29474819:29504771:-1 gene:ENSRNOG00000002104.9 transcript:ENSRNOT00000002881.7 gene_biotype:protein_coding transcript_biotype:protein_coding gene_symbol:Scaf4 description:SR-related CTD-associated fact	6	1	1	1	1.3	96.524	48134	64303	47689	53375.3	59956	68018	48952	58975.3	0.905045	0.511053
ENSRNOP00000082831	superoxide dismutase 1	Sod1	ENSRNOP00000082831.1;ENSRNOP00000002885.5	ENSRNOP00000082831.1 pep primary_assembly:mRatBN7.2:11:29456968:29462249:1 gene:ENSRNOG00000002115.7 transcript:ENSRNOT00000097395.1 gene_biotype:protein_coding transcript_biotype:protein_coding gene_symbol:Sod1 description:superoxide dismutase 1 [Source:R	2	11	11	11	51	15.487	19376000	17311000	15056000	1.72477e+07	17388000	16186000	16935000	1.68363e+07	1.02443	0.766788
ENSRNOP00000096292	leucine rich repeat containing	Lrrc8d	ENSRNOP00000096292.1;ENSRNOP00000096115.1;ENSRNOP00000092059.1;ENSRNOP00000091428.1;ENSRNOP00000090251.1;ENSRNOP00000087579.1;ENSRNOP00000081098.1;ENSRNOP00000078114.1;ENSRNOP00000002888.4	ENSRNOP00000096292.1 pep primary_assembly:mRatBN7.2:14:4029473:4134803:-1 gene:ENSRNOG00000002121.5 transcript:ENSRNOT00000118999.1 gene_biotype:protein_coding transcript_biotype:protein_coding gene_symbol:Lrrc8d description:leucine rich repeat containing	9	7	7	7	9.4	97.939	206520	252180	233630	230777	239800	140750	236450	205667	1.12209	0.513625
ENSRNOP00000074311	neural cell adhesion molecule 2	Ncam2	ENSRNOP00000074311.2;ENSRNOP00000074294.2;ENSRNOP00000002895.7	ENSRNOP00000074311.2 pep primary_assembly:mRatBN7.2:11:20104925:20539538:1 gene:ENSRNOG00000002126.8 transcript:ENSRNOT00000082417.2 gene_biotype:protein_coding transcript_biotype:protein_coding gene_symbol:Ncam2 description:neural cell adhesion molecule 2	3	14	14	14	28.1	81.092	2930800	3096200	4092700	3.37323e+06	3096600	4057700	3160800	3.43837e+06	0.981057	0.898073
ENSRNOP00000002897	leucine rich repeat containing	Lrrc8b	ENSRNOP00000002897.4	ENSRNOP00000002897.4 pep primary_assembly:mRatBN7.2:14:4354508:4416311:-1 gene:ENSRNOG00000002129.8 transcript:ENSRNOT00000002897.7 gene_biotype:protein_coding transcript_biotype:protein_coding gene_symbol:Lrrc8b description:leucine rich repeat containing	1	12	12	12	24.4	92.21	989610	1292900	652470	978327	1199500	982530	1053400	1.07848e+06	0.907138	0.63575
ENSRNOP00000002906	autophagy related 3	Atg3	ENSRNOP00000002906.3;ENSRNOP00000080816.1;ENSRNOP00000084764.1	ENSRNOP00000002906.3 pep primary_assembly:mRatBN7.2:11:55624935:55653224:-1 gene:ENSRNOG00000002094.7 transcript:ENSRNOT00000002906.7 gene_biotype:protein_coding transcript_biotype:protein_coding gene_symbol:Atg3 description:autophagy related 3 [Source:RGD	3	9	9	9	45.5	35.822	902880	821250	903300	875810	940380	850070	1014800	935083	0.936612	0.340945
ENSRNOP00000002908	capping protein inhibiting reg	Cracd	ENSRNOP00000002908.8	ENSRNOP00000002908.8 pep primary_assembly:mRatBN7.2:14:31284184:31522431:-1 gene:ENSRNOG00000002139.9 transcript:ENSRNOT00000002908.8 gene_biotype:protein_coding transcript_biotype:protein_coding gene_symbol:Cracd description:capping protein inhibiting reg	1	3	3	3	4.3	147.99		72429	46593	59511	96106	89423	43904	76477.7	0.778149	0.518522
ENSRNOP00000002918	CDP-diacylglycerol synthase 1	Cds1	ENSRNOP00000002918.3	ENSRNOP00000002918.3 pep primary_assembly:mRatBN7.2:14:7820351:7882681:-1 gene:ENSRNOG00000002142.7 transcript:ENSRNOT00000002918.7 gene_biotype:protein_coding transcript_biotype:protein_coding gene_symbol:Cds1 description:CDP-diacylglycerol synthase 1 [So	1	4	2	2	9.5	52.969	44347	60030	81479	61952	88752	67771	59950	72157.7	0.858564	0.499911
ENSRNOP00000082293	nectin cell adhesion molecule	Nectin3	ENSRNOP00000082293.1;ENSRNOP00000002957.6;ENSRNOP00000096764.1	ENSRNOP00000082293.1 pep primary_assembly:mRatBN7.2:11:54364487:54410018:1 gene:ENSRNOG00000002176.7 transcript:ENSRNOT00000115289.1 gene_biotype:protein_coding transcript_biotype:protein_coding gene_symbol:Nectin3 description:nectin cell adhesion molecule	3	2	2	2	7.8	60.805	33480	34059	62799	43446	62313	64354	47502	58056.3	0.748342	0.256238
ENSRNOP00000002973	nudix hydrolase 9	Nudt9	ENSRNOP00000002973.3	ENSRNOP00000002973.3 pep primary_assembly:mRatBN7.2:14:5675382:5693142:-1 gene:ENSRNOG00000002186.5 transcript:ENSRNOT00000002973.5 gene_biotype:protein_coding transcript_biotype:protein_coding gene_symbol:Nudt9 description:nudix hydrolase 9 [Source:RGD Sy	1	6	6	6	21.4	38.562	704300	656690	774810	711933	736450	680280	658910	691880	1.02898	0.653257
ENSRNOP00000002977	phosphoglucomutase 2	Pgm2	ENSRNOP00000002977.7	ENSRNOP00000002977.7 pep primary_assembly:mRatBN7.2:14:44164425:44199967:-1 gene:ENSRNOG00000002185.7 transcript:ENSRNOT00000002977.6 gene_biotype:protein_coding transcript_biotype:protein_coding gene_symbol:Pgm2 description:phosphoglucomutase 2 [Source:RG	1	7	7	7	13.8	73.621	172090	167480	162400	167323	157170	162400	136270	151947	1.1012	0.143234
ENSRNOP00000002992	glucosamine-6-phosphate deamin	Gnpda2	ENSRNOP00000002992.4	ENSRNOP00000002992.4 pep primary_assembly:mRatBN7.2:14:38520705:38538713:1 gene:ENSRNOG00000002177.7 transcript:ENSRNOT00000002992.7 gene_biotype:protein_coding transcript_biotype:protein_coding gene_symbol:Gnpda2 description:glucosamine-6-phosphate deamin	1	6	3	3	37.3	31.006	269310	657100	240750	389053	169660	582080	222110	324617	1.1985	0.74729
ENSRNOP00000002996	OCIA domain containing 1	Ociad1	ENSRNOP00000002996.6;ENSRNOP00000097451.1;ENSRNOP00000083306.1;ENSRNOP00000080906.1	ENSRNOP00000002996.6 pep primary_assembly:mRatBN7.2:14:34897870:34915286:-1 gene:ENSRNOG00000002205.7 transcript:ENSRNOT00000002996.6 gene_biotype:protein_coding transcript_biotype:protein_coding gene_symbol:Ociad1 description:OCIA domain containing 1 [Sou	4	10	10	3	50.2	26.844	1826000	1834800	2249600	1.97013e+06	2138000	2108700	2007500	2.08473e+06	0.945029	0.474226
ENSRNOP00000003004	hydroxysteroid (17-beta) dehyd	Hsd17b11	ENSRNOP00000003004.3;ENSRNOP00000081986.1;ENSRNOP00000029333.2;ENSRNOP00000097499.1	ENSRNOP00000003004.3 pep primary_assembly:mRatBN7.2:14:5711964:5743161:1 gene:ENSRNOG00000002210.7 transcript:ENSRNOT00000003004.7 gene_biotype:protein_coding transcript_biotype:protein_coding gene_symbol:Hsd17b11 description:hydroxysteroid (17-beta) dehyd	4	5	5	5	25.8	32.937	300080	328540	177860	268827	278350	231650	236230	248743	1.08074	0.700339
ENSRNOP00000092736	GTP binding elongation factor G	Guf1	ENSRNOP00000092736.1;ENSRNOP00000003017.5	ENSRNOP00000092736.1 pep primary_assembly:mRatBN7.2:14:38537953:38557331:-1 gene:ENSRNOG00000002207.7 transcript:ENSRNOT00000104146.1 gene_biotype:protein_coding transcript_biotype:protein_coding gene_symbol:Guf1 description:GTP binding elongation factor G	2	1	1	1	2.4	70.92	13936		27022	20479	16084	14542		15313	1.33736	0.515091
ENSRNOP00000056514	steroid 5 alpha-reductase 3 [	Srd5a3	ENSRNOP00000056514.4;ENSRNOP00000003021.4	ENSRNOP00000056514.4 pep primary_assembly:mRatBN7.2:14:32046587:32060735:-1 gene:ENSRNOG00000002216.9 transcript:ENSRNOT00000059763.4 gene_biotype:protein_coding transcript_biotype:protein_coding gene_symbol:Srd5a3 description:steroid 5 alpha-reductase 3 [	2	2	2	2	11.2	31.829	85433	74216	52508	70719	85829	73709	66604	75380.7	0.938158	0.697999
ENSRNOP00000003046	COP9 signalosome subunit 4	Cops4	ENSRNOP00000003046.4	ENSRNOP00000003046.4 pep primary_assembly:mRatBN7.2:14:9078576:9108887:-1 gene:ENSRNOG00000023650.6 transcript:ENSRNOT00000003046.7 gene_biotype:protein_coding transcript_biotype:protein_coding gene_symbol:Cops4 description:COP9 signalosome subunit 4 [Sour	1	19	19	19	65.7	42.794	4800600	4667700	4734300	4734200	5162600	4809000	4708300	4893300	0.967486	0.328225
ENSRNOP00000068756	KIT proto-oncogene receptor tyro	Kit	ENSRNOP00000068756.2;ENSRNOP00000003050.1	ENSRNOP00000068756.2 pep primary_assembly:mRatBN7.2:14:32548877:32593653:-1 gene:ENSRNOG00000002227.4 transcript:ENSRNOT00000090654.2 gene_biotype:protein_coding transcript_biotype:protein_coding gene_symbol:Kit description:KIT proto-oncogene receptor tyro	2	17	17	17	25.7	108.52	1215400	1211900	2231100	1552800	2010600	2117700	1634600	1.92097e+06	0.808343	0.375376
ENSRNOP00000097524	scavenger receptor class B, me	Scarb2	ENSRNOP00000097524.1;ENSRNOP00000003052.5;ENSRNOP00000078097.1	ENSRNOP00000097524.1 pep primary_assembly:mRatBN7.2:14:15558236:15609809:1 gene:ENSRNOG00000002225.7 transcript:ENSRNOT00000103647.1 gene_biotype:protein_coding transcript_biotype:protein_coding gene_symbol:Scarb2 description:scavenger receptor class B, me	3	7	7	7	19.7	54.09	603970	666020	638400	636130	729110	708250	551410	662923	0.959583	0.672693
ENSRNOP00000081526	nucleoporin 54	Nup54	ENSRNOP00000081526.1;ENSRNOP00000003070.3	ENSRNOP00000081526.1 pep primary_assembly:mRatBN7.2:14:15617792:15636028:1 gene:ENSRNOG00000002247.6 transcript:ENSRNOT00000118729.1 gene_biotype:protein_coding transcript_biotype:protein_coding gene_symbol:Nup54 description:nucleoporin 54 [Source:RGD Symb	2	2	2	2	5.7	53.728	71186	74159	67523	70956	80398	65105	62509	69337.3	1.02334	0.797455
ENSRNOP00000038196	SEC31 homolog A, COPII coat comp	Sec31a	ENSRNOP00000038196.5;ENSRNOP00000071621.2;ENSRNOP00000003072.3;ENSRNOP00000079808.1;ENSRNOP00000085826.1	ENSRNOP00000038196.5 pep primary_assembly:mRatBN7.2:14:9214349:9269271:1 gene:ENSRNOG00000002251.9 transcript:ENSRNOT00000033489.6 gene_biotype:protein_coding transcript_biotype:protein_coding gene_symbol:Sec31a description:SEC31 homolog A, COPII coat comp	5	23	23	23	25.9	120.91	4066700	3968600	3735000	3.92343e+06	3938200	3827500	3986100	3.91727e+06	1.00157	0.957603
ENSRNOP00000003083	enolase-phosphatase 1	Enoph1	ENSRNOP00000003083.3;ENSRNOP00000091321.1	ENSRNOP00000003083.3 pep primary_assembly:mRatBN7.2:14:9531339:9557292:-1 gene:ENSRNOG00000002262.4 transcript:ENSRNOT00000003083.4 gene_biotype:protein_coding transcript_biotype:protein_coding gene_symbol:Enoph1 description:enolase-phosphatase 1 [Source:R	2	7	7	7	31	28.874	1874600	2209400	2222700	2.10223e+06	1983400	2189600	2201200	2.12473e+06	0.98941	0.874863
ENSRNOP00000003106	heterogeneous nuclear ribonucle	Hnrnpdl	ENSRNOP00000003106.5;ENSRNOP00000079740.1;ENSRNOP00000075589.1	ENSRNOP00000003106.5 pep primary_assembly:mRatBN7.2:14:9558368:9562506:1 gene:ENSRNOG00000002270.8 transcript:ENSRNOT00000003106.7 gene_biotype:protein_coding transcript_biotype:protein_coding gene_symbol:Hnrnpdl description:heterogeneous nuclear ribonucle	3	6	5	5	22.7	35.294	1279700	1277200	1130600	1.22917e+06	1203400	1243700	948050	1.13172e+06	1.08611	0.405368
ENSRNOP00000003128	transmembrane protein 33	Tmem33	ENSRNOP00000003128.4;ENSRNOP00000097007.1;ENSRNOP00000091618.1;ENSRNOP00000082099.1	ENSRNOP00000003128.4 pep primary_assembly:mRatBN7.2:14:40888485:40910715:-1 gene:ENSRNOG00000002254.7 transcript:ENSRNOT00000003128.5 gene_biotype:protein_coding transcript_biotype:protein_coding gene_symbol:Tmem33 description:transmembrane protein 33 [Sou	4	5	5	5	19.1	27.884	928880	479230	699240	702450	856880	1146600	1202900	1.06879e+06	0.657237	0.0951628
ENSRNOP00000003158	heterogeneous nuclear ribonucleo	Hnrnpd	ENSRNOP00000003158.4;ENSRNOP00000046491.2;ENSRNOP00000003173.4	ENSRNOP00000003158.4 pep primary_assembly:mRatBN7.2:14:9615479:9633786:1 gene:ENSRNOG00000002292.9 transcript:ENSRNOT00000003158.7 gene_biotype:protein_coding transcript_biotype:protein_coding gene_symbol:Hnrnpd description:heterogeneous nuclear ribonucleo	3	12	12	12	34.5	32.672	5889000	5791000	5729600	5803200	5515900	5805100	5554700	5.62523e+06	1.03164	0.155416
ENSRNOP00000003164	musashi RNA-binding protein 2 [	Msi2	ENSRNOP00000003164.8;ENSRNOP00000087497.1;ENSRNOP00000096507.1;ENSRNOP00000094550.1;ENSRNOP00000090730.1;ENSRNOP00000084373.1;ENSRNOP00000001532.6	ENSRNOP00000003164.8 pep primary_assembly:mRatBN7.2:10:73152321:73508666:-1 gene:ENSRNOG00000025338.8 transcript:ENSRNOT00000003164.9 gene_biotype:protein_coding transcript_biotype:protein_coding gene_symbol:Msi2 description:musashi RNA-binding protein 2 [	7	2	2	2	9.7	29.695	222810	201260	262060	228710	210650	202920	204800	206123	1.10958	0.276701
ENSRNOP00000003170	gamma-aminobutyric acid type	Gabrb1	ENSRNOP00000003170.5	ENSRNOP00000003170.5 pep primary_assembly:mRatBN7.2:14:36080393:36548948:-1 gene:ENSRNOG00000002327.4 transcript:ENSRNOT00000003170.4 gene_biotype:protein_coding transcript_biotype:protein_coding gene_symbol:Gabrb1 description:gamma-aminobutyric acid type	1	12	12	6	26.4	54.072	3138200	3135300	3501900	3.25847e+06	3666400	3513100	3338300	3.50593e+06	0.929415	0.183956
ENSRNOP00000003179	diacylglycerol kinase epsilon [	Dgke	ENSRNOP00000003179.4	ENSRNOP00000003179.4 pep primary_assembly:mRatBN7.2:10:73855583:73877100:-1 gene:ENSRNOG00000002338.7 transcript:ENSRNOT00000003179.6 gene_biotype:protein_coding transcript_biotype:protein_coding gene_symbol:Dgke description:diacylglycerol kinase epsilon [	1	1	1	1	2.3	63.959	71401	58927	56050	62126	95930	70723	65707	77453.3	0.802109	0.217091
ENSRNOP00000003189	solute carrier family 15 memb	Slc15a2	ENSRNOP00000003189.6;ENSRNOP00000086877.1;ENSRNOP00000078734.1;ENSRNOP00000094276.1	ENSRNOP00000003189.6 pep primary_assembly:mRatBN7.2:11:64014182:64043225:1 gene:ENSRNOG00000002305.6 transcript:ENSRNOT00000003189.6 gene_biotype:protein_coding transcript_biotype:protein_coding gene_symbol:Slc15a2 description:solute carrier family 15 memb	4	10	10	10	19.2	82.619	1437600	1084900	1011000	1.17783e+06	1146400	1287500	918810	1117570	1.05392	0.740701
ENSRNOP00000003191	gamma-aminobutyric acid type A	Gabra4	ENSRNOP00000003191.5	ENSRNOP00000003191.5 pep primary_assembly:mRatBN7.2:14:36590782:36665844:1 gene:ENSRNOG00000002336.7 transcript:ENSRNOT00000003191.7 gene_biotype:protein_coding transcript_biotype:protein_coding gene_symbol:Gabra4 description:gamma-aminobutyric acid type A	1	5	5	5	13.4	60.951	141350	95848	60325	99174.3	70320	64609	105060	79996.3	1.23974	0.51139
ENSRNOP00000003197	gamma-aminobutyric acid type A	Gabra2	ENSRNOP00000003197.8;ENSRNOP00000060621.3	ENSRNOP00000003197.8 pep primary_assembly:mRatBN7.2:14:37100714:37228944:1 gene:ENSRNOG00000002349.9 transcript:ENSRNOT00000003197.8 gene_biotype:protein_coding transcript_biotype:protein_coding gene_symbol:Gabra2 description:gamma-aminobutyric acid type A	2	8	5	5	24.1	48.044	834270	748780	868770	817273	815880	803900	664100	761293	1.07353	0.406329
ENSRNOP00000074213	microtubule affinity regulatin	Mark1	ENSRNOP00000074213.2;ENSRNOP00000003198.6	ENSRNOP00000074213.2 pep primary_assembly:mRatBN7.2:13:96451487:96501971:-1 gene:ENSRNOG00000002339.7 transcript:ENSRNOT00000080309.2 gene_biotype:protein_coding transcript_biotype:protein_coding gene_symbol:Mark1 description:microtubule affinity regulatin	2	15	8	8	26.5	88.386	345740	435200	526930	435957	426700	546740	436930	470123	0.927324	0.626424
ENSRNOP00000003216	RAB3 GTPase activating non-c	Rab3gap2	ENSRNOP00000003216.8;ENSRNOP00000038422.7	ENSRNOP00000003216.8 pep primary_assembly:mRatBN7.2:13:96757460:96829478:1 gene:ENSRNOG00000002353.9 transcript:ENSRNOT00000003216.9 gene_biotype:protein_coding transcript_biotype:protein_coding gene_symbol:Rab3gap2 description:RAB3 GTPase activating non-c	2	21	21	21	23.4	154.37	2000400	2080500	2186500	2.08913e+06	2379000	2436000	1865300	2.22677e+06	0.938191	0.507486
ENSRNOP00000003219	serine carboxypeptidase 1	Scpep1	ENSRNOP00000003219.3;ENSRNOP00000092430.1;ENSRNOP00000081360.1	ENSRNOP00000003219.3 pep primary_assembly:mRatBN7.2:10:73703278:73732850:-1 gene:ENSRNOG00000002358.6 transcript:ENSRNOT00000003219.4 gene_biotype:protein_coding transcript_biotype:protein_coding gene_symbol:Scpep1 description:serine carboxypeptidase 1 [So	3	3	3	3	10.7	49.607	256760	247280	203470	235837	260340	374510	400790	345213	0.683162	0.0767253
ENSRNOP00000003251	A-kinase anchoring protein 1 [	Akap1	ENSRNOP00000003251.6;ENSRNOP00000052543.4	ENSRNOP00000003251.6 pep primary_assembly:mRatBN7.2:10:73621913:73653896:-1 gene:ENSRNOG00000002373.9 transcript:ENSRNOT00000003251.8 gene_biotype:protein_coding transcript_biotype:protein_coding gene_symbol:Akap1 description:A-kinase anchoring protein 1 [	2	5	5	5	10.3	91.829	143000	238390	203460	194950	271010	197780	171490	213427	0.913429	0.673973
ENSRNOP00000003282			ENSRNOP00000003282.4	ENSRNOP00000003282.4 pep primary_assembly:mRatBN7.2:X:131644704:131755284:-1 gene:ENSRNOG00000002413.7 transcript:ENSRNOT00000003282.6 gene_biotype:protein_coding transcript_biotype:protein_coding	1	8	8	7	23.7	62.561	1165500	1059400	1271800	1.16557e+06	1188700	1339700	1109900	1.21277e+06	0.961081	0.631833
ENSRNOP00000003283	proteolipid protein 1	Plp1	ENSRNOP00000003283.4	ENSRNOP00000003283.4 pep primary_assembly:mRatBN7.2:X:100185767:100201032:1 gene:ENSRNOG00000002419.7 transcript:ENSRNOT00000003283.7 gene_biotype:protein_coding transcript_biotype:protein_coding gene_symbol:Plp1 description:proteolipid protein 1 [Source:R	1	11	11	11	35	30.077	191560000	163470000	124940000	159990000	123800000	119380000	174150000	139110000	1.1501	0.468603
ENSRNOP00000079536	pyridoxal-dependent decarboxylas	Pdxdc1	ENSRNOP00000079536.1;ENSRNOP00000083833.1;ENSRNOP00000051130.4;ENSRNOP00000076319.2;ENSRNOP00000074713.2;ENSRNOP00000074368.2;ENSRNOP00000003284.5	ENSRNOP00000079536.1 pep primary_assembly:mRatBN7.2:10:2050015:2105969:1 gene:ENSRNOG00000002407.8 transcript:ENSRNOT00000101094.1 gene_biotype:protein_coding transcript_biotype:protein_coding gene_symbol:Pdxdc1 description:pyridoxal-dependent decarboxylas	7	4	4	4	12	67.599	110430	30249	231100	123926	302940	138760	94567	178756	0.693272	0.559179
ENSRNOP00000003346	G3BP stress granule assembly fa	G3bp2	ENSRNOP00000003346.4;ENSRNOP00000091154.1;ENSRNOP00000079770.1;ENSRNOP00000047902.4	ENSRNOP00000003346.4 pep primary_assembly:mRatBN7.2:14:15987676:16018975:1 gene:ENSRNOG00000002433.6 transcript:ENSRNOT00000003346.5 gene_biotype:protein_coding transcript_biotype:protein_coding gene_symbol:G3bp2 description:G3BP stress granule assembly fa	4	12	12	11	35.7	54.073	2262800	2505700	2772900	2513800	2665500	2807400	2724200	2.73237e+06	0.920008	0.226215
ENSRNOP00000003349	nidogen 1	Nid1	ENSRNOP00000003349.5	ENSRNOP00000003349.5 pep primary_assembly:mRatBN7.2:17:86085077:86158267:1 gene:ENSRNOG00000002461.8 transcript:ENSRNOT00000003349.8 gene_biotype:protein_coding transcript_biotype:protein_coding gene_symbol:Nid1 description:nidogen 1 [Source:RGD Symbol;Acc	1	11	11	11	13.5	136.37	828330	732380	825540	795417	731770	975200	842840	849937	0.935854	0.518517
ENSRNOP00000003407	tenascin R	Tnr	ENSRNOP00000003407.6;ENSRNOP00000080140.1	ENSRNOP00000003407.6 pep primary_assembly:mRatBN7.2:13:72091585:72167641:1 gene:ENSRNOG00000002468.9 transcript:ENSRNOT00000003407.6 gene_biotype:protein_coding transcript_biotype:protein_coding gene_symbol:Tnr description:tenascin R [Source:RGD Symbol;Acc	2	46	46	46	49.5	149.6	46643000	47162000	42348000	4.53843e+07	42809000	43146000	42116000	4.26903e+07	1.06311	0.158302
ENSRNOP00000003414			ENSRNOP00000003414.6	ENSRNOP00000003414.6 pep primary_assembly:mRatBN7.2:X:130504698:130518328:-1 gene:ENSRNOG00000002529.7 transcript:ENSRNOT00000003414.7 gene_biotype:protein_coding transcript_biotype:protein_coding	1	10	4	4	62.8	20.745	375200	426980	410080	404087	431640	375890	362950	390160	1.03569	0.62073
ENSRNOP00000003437	PDS5 cohesin associated factor	Pds5a	ENSRNOP00000003437.6	ENSRNOP00000003437.6 pep primary_assembly:mRatBN7.2:14:42552647:42648669:1 gene:ENSRNOG00000002541.7 transcript:ENSRNOT00000003437.7 gene_biotype:protein_coding transcript_biotype:protein_coding gene_symbol:Pds5a description:PDS5 cohesin associated factor	1	1	1	1	1.2	150.37	20034	21273	16810	19372.3	19043	25336	15354	19911	0.972946	0.874617
ENSRNOP00000003514	calcium regulated heat stable p	Carhsp1	ENSRNOP00000003514.3;ENSRNOP00000079345.1;ENSRNOP00000094985.1;ENSRNOP00000079820.1	ENSRNOP00000003514.3 pep primary_assembly:mRatBN7.2:10:6946959:6960550:1 gene:ENSRNOG00000002610.6 transcript:ENSRNOT00000003514.6 gene_biotype:protein_coding transcript_biotype:protein_coding gene_symbol:Carhsp1 description:calcium regulated heat stable p	4	4	4	4	59.2	15.906	1009600	1058400	693570	920523	823550	802220	670030	765267	1.20288	0.278824
ENSRNOP00000075523	nascent polypeptide associated comple	Naca	ENSRNOP00000075523.2;ENSRNOP00000003550.6;ENSRNOP00000066181.1	ENSRNOP00000075523.2 pep primary_assembly:mRatBN7.2:7:469747:481992:1 gene:ENSRNOG00000002632.9 transcript:ENSRNOT00000085092.2 gene_biotype:protein_coding transcript_biotype:protein_coding gene_symbol:Naca description:nascent polypeptide associated comple	3	3	3	3	17.6	25.958	1909100	1872800	2111500	1.96447e+06	1944900	1925600	1918100	1.92953e+06	1.0181	0.664326
ENSRNOP00000097868			ENSRNOP00000097868.1;ENSRNOP00000003558.6;ENSRNOP00000072879.2;ENSRNOP00000071484.1	ENSRNOP00000097868.1 pep primary_assembly:mRatBN7.2:13:63427041:63445652:1 gene:ENSRNOG00000002618.8 transcript:ENSRNOT00000085906.2 gene_biotype:protein_coding transcript_biotype:protein_coding;ENSRNOP00000003558.6 pep primary_assembly:mRatBN7.2:13:634270	4	3	3	3	7.9	64.325	111460	85592	52951	83334.3	70068	69940	81103	73703.7	1.13067	0.607964
ENSRNOP00000003586	calcyclin binding protein	Cacybp	ENSRNOP00000003586.3;ENSRNOP00000068249.2	ENSRNOP00000003586.3 pep primary_assembly:mRatBN7.2:13:72437490:72450177:-1 gene:ENSRNOG00000002572.6 transcript:ENSRNOT00000003586.6 gene_biotype:protein_coding transcript_biotype:protein_coding gene_symbol:Cacybp description:calcyclin binding protein [So	2	13	13	13	58.5	26.541	2688000	2405500	2718000	2.60383e+06	2414700	2763300	2860200	2679400	0.971797	0.676067
ENSRNOP00000003593	G protein-coupled receptor 37 [	Gpr37	ENSRNOP00000003593.4	ENSRNOP00000003593.4 pep primary_assembly:mRatBN7.2:4:54138870:54161001:-1 gene:ENSRNOG00000002524.7 transcript:ENSRNOT00000003593.7 gene_biotype:protein_coding transcript_biotype:protein_coding gene_symbol:Gpr37 description:G protein-coupled receptor 37 [	1	5	5	5	10.4	66.961	1265500	1239200	510670	1.00512e+06	1051100	700310	892240	881217	1.14061	0.667102
ENSRNOP00000003605	laminin subunit gamma 1	Lamc1	ENSRNOP00000003605.5	ENSRNOP00000003605.5 pep primary_assembly:mRatBN7.2:13:65374372:65501492:-1 gene:ENSRNOG00000002680.8 transcript:ENSRNOT00000003605.8 gene_biotype:protein_coding transcript_biotype:protein_coding gene_symbol:Lamc1 description:laminin subunit gamma 1 [Sourc	1	30	30	30	28.3	177.38	2332500	1820500	2271000	2.14133e+06	2356300	2358300	2208400	2.30767e+06	0.927921	0.380364
ENSRNOP00000003611	NME/NM23 nucleoside diphosphate	Nme2	ENSRNOP00000003611.3;ENSRNOP00000087780.1;ENSRNOP00000092727.1	ENSRNOP00000003611.3 pep primary_assembly:mRatBN7.2:10:78897770:78903538:-1 gene:ENSRNOG00000002671.4 transcript:ENSRNOT00000003611.4 gene_biotype:protein_coding transcript_biotype:protein_coding gene_symbol:Nme2 description:NME/NM23 nucleoside diphosphate	3	12	6	6	79.6	17.283	11746000	14761000	13820000	1.34423e+07	12517000	13592000	10124000	1.20777e+07	1.11299	0.371742
ENSRNOP00000003633	4-aminobutyrate aminotransferase	Abat	ENSRNOP00000003633.2;ENSRNOP00000082381.1;ENSRNOP00000083566.1	ENSRNOP00000003633.2 pep primary_assembly:mRatBN7.2:10:6999819:7092835:-1 gene:ENSRNOG00000002636.8 transcript:ENSRNOT00000003633.5 gene_biotype:protein_coding transcript_biotype:protein_coding gene_symbol:Abat description:4-aminobutyrate aminotransferase	3	27	27	27	71.2	56.455	19665000	23580000	28547000	2.39307e+07	24990000	25581000	25586000	2.53857e+07	0.942684	0.602579
ENSRNOP00000003638	myotubularin related protein 1	Mtmr1	ENSRNOP00000003638.4;ENSRNOP00000069284.1;ENSRNOP00000077609.1	ENSRNOP00000003638.4 pep primary_assembly:mRatBN7.2:18:215089:248541:1 gene:ENSRNOG00000002697.8 transcript:ENSRNOT00000003638.7 gene_biotype:protein_coding transcript_biotype:protein_coding gene_symbol:Mtmr1 description:myotubularin related protein 1 [Sou	3	19	19	18	42.2	74.514	2286800	2241400	1625900	2.05137e+06	2221600	1957800	1965900	2.04843e+06	1.00143	0.990438
ENSRNOP00000003674	NADH:ubiquinone oxidoreductase	Ndufb4	ENSRNOP00000003674.4;ENSRNOP00000080099.1;ENSRNOP00000042135.5;ENSRNOP00000096342.1;ENSRNOP00000051237.3;ENSRNOP00000077304.1;ENSRNOP00000040779.4;ENSRNOP00000041127.6	ENSRNOP00000003674.4 pep primary_assembly:mRatBN7.2:11:63063795:63070425:1 gene:ENSRNOG00000002721.8 transcript:ENSRNOT00000003674.8 gene_biotype:protein_coding transcript_biotype:protein_coding gene_symbol:Ndufb4 description:NADH:ubiquinone oxidoreductase	8	7	7	7	47.3	15.064	5914800	5422900	7399000	6.24557e+06	6663700	5907200	7680600	6750500	0.925201	0.555251
ENSRNOP00000003696	platelet-activating factor	Pafah1b1	ENSRNOP00000003696.4	ENSRNOP00000003696.4 pep primary_assembly:mRatBN7.2:10:59534117:59591808:-1 gene:ENSRNOG00000002755.7 transcript:ENSRNOT00000003696.7 gene_biotype:protein_coding transcript_biotype:protein_coding gene_symbol:Pafah1b1 description:platelet-activating factor	1	22	22	22	66.3	46.67	13691000	12338000	14019000	1.33493e+07	12922000	12655000	13524000	1.30337e+07	1.02422	0.612266
ENSRNOP00000003697	phosphoribosyl pyrophosphate	Prpsap2	ENSRNOP00000003697.2	ENSRNOP00000003697.2 pep primary_assembly:mRatBN7.2:10:46410835:46445849:-1 gene:ENSRNOG00000002724.8 transcript:ENSRNOT00000003697.4 gene_biotype:protein_coding transcript_biotype:protein_coding gene_symbol:Prpsap2 description:phosphoribosyl pyrophosphate	1	13	13	12	53.7	40.866	2467600	2343900	2485100	2432200	2432000	2594800	2436900	2487900	0.977612	0.467929
ENSRNOP00000067983			ENSRNOP00000067983.1;ENSRNOP00000047310.3;ENSRNOP00000003741.2;ENSRNOP00000071634.1;ENSRNOP00000096478.1;ENSRNOP00000087105.1;ENSRNOP00000078000.1;ENSRNOP00000078849.1	ENSRNOP00000067983.1 pep primary_assembly:mRatBN7.2:X:65860289:65910322:1 gene:ENSRNOG00000002767.9 transcript:ENSRNOT00000076079.3 gene_biotype:protein_coding transcript_biotype:protein_coding;ENSRNOP00000047310.3 pep primary_assembly:mRatBN7.2:X:65860172	8	30	26	26	45	90.384	5226700	4998800	4242500	4.82267e+06	5242700	4663800	4357600	4754700	1.01429	0.871658
ENSRNOP00000003762	methylthioribose-1-phosphate iso	Mri1	ENSRNOP00000003762.4	ENSRNOP00000003762.4 pep primary_assembly:mRatBN7.2:19:23907335:23913320:1 gene:ENSRNOG00000026211.7 transcript:ENSRNOT00000003762.7 gene_biotype:protein_coding transcript_biotype:protein_coding gene_symbol:Mri1 description:methylthioribose-1-phosphate iso	1	11	11	11	50.7	39.587	2263100	2173300	1978500	2138300	2064000	2043300	1607700	1905000	1.12247	0.243829
ENSRNOP00000003772	glycerophosphodiester phosphodie	Gdpd2	ENSRNOP00000003772.3	ENSRNOP00000003772.3 pep primary_assembly:mRatBN7.2:X:65826574:65835361:1 gene:ENSRNOG00000002800.8 transcript:ENSRNOT00000003772.6 gene_biotype:protein_coding transcript_biotype:protein_coding gene_symbol:Gdpd2 description:glycerophosphodiester phosphodie	1	2	2	2	5.4	61.202	84553	116080	251980	150871	247530	372090	130820	250147	0.60313	0.315323
ENSRNOP00000077913	sperm associated antigen 9	Spag9	ENSRNOP00000077913.1;ENSRNOP00000003777.6;ENSRNOP00000093662.1;ENSRNOP00000096035.1;ENSRNOP00000077739.1;ENSRNOP00000073784.1;ENSRNOP00000096462.1;ENSRNOP00000086317.1	ENSRNOP00000077913.1 pep primary_assembly:mRatBN7.2:10:78943479:79077797:1 gene:ENSRNOG00000002749.8 transcript:ENSRNOT00000117102.1 gene_biotype:protein_coding transcript_biotype:protein_coding gene_symbol:Spag9 description:sperm associated antigen 9 [Sou	8	19	19	16	22.9	144.54	1293900	1445500	1241200	1.32687e+06	1422400	1298900	1352700	1358000	0.977074	0.683289
ENSRNOP00000003779	lipoic acid synthetase	Lias	ENSRNOP00000003779.3	ENSRNOP00000003779.3 pep primary_assembly:mRatBN7.2:14:42876699:42893783:-1 gene:ENSRNOG00000002759.5 transcript:ENSRNOT00000003779.5 gene_biotype:protein_coding transcript_biotype:protein_coding gene_symbol:Lias description:lipoic acid synthetase [Source:	1	3	3	3	16.9	41.874	28181	28805	24438	27141.3	27220	27933	23507	26220	1.03514	0.658718
ENSRNOP00000080703	prostaglandin E synthase 3	Ptges3	ENSRNOP00000080703.1;ENSRNOP00000082352.1;ENSRNOP00000096607.1;ENSRNOP00000003787.8;ENSRNOP00000085230.1;ENSRNOP00000096677.1;ENSRNOP00000096830.1;ENSRNOP00000080000.1;ENSRNOP00000068840.1	ENSRNOP00000080703.1 pep primary_assembly:mRatBN7.2:7:499952:507571:1 gene:ENSRNOG00000002642.8 transcript:ENSRNOT00000097034.1 gene_biotype:protein_coding transcript_biotype:protein_coding gene_symbol:Ptges3 description:prostaglandin E synthase 3 [Source:	9	6	6	6	47	17.57	5553800	5402200	5345000	5.43367e+06	5505100	6001600	5311100	5.60593e+06	0.969271	0.467572
ENSRNOP00000003791	saccharopine dehydrogenase (pu	Sccpdh	ENSRNOP00000003791.4;ENSRNOP00000054601.4	ENSRNOP00000003791.4 pep primary_assembly:mRatBN7.2:13:91400190:91422222:1 gene:ENSRNOG00000066712.1 transcript:ENSRNOT00000003791.7 gene_biotype:protein_coding transcript_biotype:protein_coding gene_symbol:Sccpdh description:saccharopine dehydrogenase (pu	2	15	15	15	64.3	47.088	1811800	1633300	1904100	1.78307e+06	1633800	1707600	1522900	1.62143e+06	1.09969	0.167216
ENSRNOP00000003834	RNA binding motif protein 25 [	Rbm25	ENSRNOP00000003834.7;ENSRNOP00000082069.1;ENSRNOP00000097947.1	ENSRNOP00000003834.7 pep primary_assembly:mRatBN7.2:6:103284849:103317854:1 gene:ENSRNOG00000002874.8 transcript:ENSRNOT00000003834.8 gene_biotype:protein_coding transcript_biotype:protein_coding gene_symbol:Rbm25 description:RNA binding motif protein 25 [	3	6	6	6	13.5	91.768	133820	146260	139420	139833	141150	154490	129110	141583	0.98764	0.84077
ENSRNOP00000078690	CDC42 binding protein kinase	Cdc42bpa	ENSRNOP00000078690.1;ENSRNOP00000073612.2;ENSRNOP00000081450.1;ENSRNOP00000086891.1;ENSRNOP00000077481.1;ENSRNOP00000003837.2;ENSRNOP00000093143.1	ENSRNOP00000078690.1 pep primary_assembly:mRatBN7.2:13:91684007:91903732:1 gene:ENSRNOG00000002841.8 transcript:ENSRNOT00000119463.1 gene_biotype:protein_coding transcript_biotype:protein_coding gene_symbol:Cdc42bpa description:CDC42 binding protein kinase	7	14	13	13	12.3	181.62	703640	687710	576280	655877	672270	665290	621360	652973	1.00445	0.949544
ENSRNOP00000003840	PH domain and leucine rich rep	Phlpp1	ENSRNOP00000003840.3	ENSRNOP00000003840.3 pep primary_assembly:mRatBN7.2:13:22308548:22530977:1 gene:ENSRNOG00000002821.5 transcript:ENSRNOT00000003840.4 gene_biotype:protein_coding transcript_biotype:protein_coding gene_symbol:Phlpp1 description:PH domain and leucine rich rep	1	1	1	1	0.8	185.81		67922	54963	61442.5	81726	76391		79058.5	0.777178	0.128436
ENSRNOP00000003859	protein phosphatase, Mg2+/Mn2+	Ppm1e	ENSRNOP00000003859.2	ENSRNOP00000003859.2 pep primary_assembly:mRatBN7.2:10:72055208:72187282:-1 gene:ENSRNOG00000024730.2 transcript:ENSRNOT00000003859.3 gene_biotype:protein_coding transcript_biotype:protein_coding gene_symbol:Ppm1e description:protein phosphatase, Mg2+/Mn2+	1	19	19	19	35.1	83.438	10031000	10965000	7844700	9.61357e+06	11154000	9248500	9502700	9968400	0.964404	0.763334
ENSRNOP00000003867	glycogen synthase kinase 3 bet	Gsk3b	ENSRNOP00000003867.4;ENSRNOP00000094301.1;ENSRNOP00000075708.1	ENSRNOP00000003867.4 pep primary_assembly:mRatBN7.2:11:62504316:62648646:-1 gene:ENSRNOG00000002833.8 transcript:ENSRNOT00000003867.7 gene_biotype:protein_coding transcript_biotype:protein_coding gene_symbol:Gsk3b description:glycogen synthase kinase 3 bet	3	17	17	11	53.1	47.991	4117700	3909400	3710300	3.91247e+06	4158100	3668900	3760300	3.86243e+06	1.01295	0.806043
ENSRNOP00000085194	A-kinase anchoring protein 10	Akap10	ENSRNOP00000085194.1;ENSRNOP00000087715.1;ENSRNOP00000003871.5;ENSRNOP00000084439.1;ENSRNOP00000090534.1	ENSRNOP00000085194.1 pep primary_assembly:mRatBN7.2:10:46551532:46608769:-1 gene:ENSRNOG00000002899.5 transcript:ENSRNOT00000119471.1 gene_biotype:protein_coding transcript_biotype:protein_coding gene_symbol:Akap10 description:A-kinase anchoring protein 10	5	7	7	7	18.1	69.686	236980	279590	247380	254650	352680	339770	271350	321267	0.792644	0.0782319
ENSRNOP00000092999	septin 9	Septin9	ENSRNOP00000092999.1;ENSRNOP00000003891.6;ENSRNOP00000096445.1;ENSRNOP00000079555.1	ENSRNOP00000092999.1 pep primary_assembly:mRatBN7.2:10:102444646:102579048:1 gene:ENSRNOG00000002807.9 transcript:ENSRNOT00000099603.1 gene_biotype:protein_coding transcript_biotype:protein_coding gene_symbol:Septin9 description:septin 9 [Source:RGD Symbol	4	25	25	25	52.9	63.864	4633300	5018400	7157100	5.60293e+06	5749400	6672600	5397800	5.93993e+06	0.943265	0.718886
ENSRNOP00000084219	carbonic anhydrase 4	Ca4	ENSRNOP00000084219.1;ENSRNOP00000003908.3	ENSRNOP00000084219.1 pep primary_assembly:mRatBN7.2:10:69832187:69836501:1 gene:ENSRNOG00000002916.8 transcript:ENSRNOT00000113034.1 gene_biotype:protein_coding transcript_biotype:protein_coding gene_symbol:Ca4 description:carbonic anhydrase 4 [Source:RGD	2	2	2	2	9.1	35.057	1148400	797970	739650	895340	656180	784230	1574600	1.005e+06	0.890883	0.744729
ENSRNOP00000003921	albumin	Alb	ENSRNOP00000003921.2;ENSRNOP00000076520.1	ENSRNOP00000003921.2 pep primary_assembly:mRatBN7.2:14:17607415:17622814:-1 gene:ENSRNOG00000002911.6 transcript:ENSRNOT00000003921.5 gene_biotype:protein_coding transcript_biotype:protein_coding gene_symbol:Alb description:albumin [Source:RGD Symbol;Acc:2	2	38	38	35	67.4	68.758	43494000	39643000	36768000	3.99683e+07	23916000	35081000	38390000	3.24623e+07	1.23122	0.192369
ENSRNOP00000003926	guanylate kinase 1	Guk1	ENSRNOP00000003926.7;ENSRNOP00000085799.1;ENSRNOP00000095535.1;ENSRNOP00000081629.1	ENSRNOP00000003926.7 pep primary_assembly:mRatBN7.2:10:43971509:43975441:-1 gene:ENSRNOG00000002928.7 transcript:ENSRNOT00000003926.7 gene_biotype:protein_coding transcript_biotype:protein_coding gene_symbol:Guk1 description:guanylate kinase 1 [Source:RGD	4	10	10	10	70	22.834	1650600	1885400	1470200	1.66873e+06	1735200	1516300	1424200	1.55857e+06	1.07068	0.507419
ENSRNOP00000079184	calcium voltage-gated channe	Cacna1e	ENSRNOP00000079184.1;ENSRNOP00000069641.2;ENSRNOP00000003928.7;ENSRNOP00000003869.7;ENSRNOP00000077051.1	ENSRNOP00000079184.1 pep primary_assembly:mRatBN7.2:13:66581920:66894450:-1 gene:ENSRNOG00000002863.9 transcript:ENSRNOT00000114343.1 gene_biotype:protein_coding transcript_biotype:protein_coding gene_symbol:Cacna1e description:calcium voltage-gated channe	5	26	26	24	16.4	253.87	2482800	2570100	1677600	2243500	2246100	1885000	2139900	2.09033e+06	1.07327	0.640438
ENSRNOP00000003932	ATPase Na+/K+ transporting su	Atp1b1	ENSRNOP00000003932.4;ENSRNOP00000068146.2	ENSRNOP00000003932.4 pep primary_assembly:mRatBN7.2:13:76786581:76807459:-1 gene:ENSRNOG00000002934.8 transcript:ENSRNOT00000003932.8 gene_biotype:protein_coding transcript_biotype:protein_coding gene_symbol:Atp1b1 description:ATPase Na+/K+ transporting su	2	15	15	15	43.7	34.976	114880000	104650000	118690000	112740000	107390000	109190000	119470000	1.12017e+08	1.00646	0.904021
ENSRNOP00000003941	tRNA methyltransferase 1	Trmt1	ENSRNOP00000003941.5;ENSRNOP00000079419.1;ENSRNOP00000086901.1	ENSRNOP00000003941.5 pep primary_assembly:mRatBN7.2:19:23456758:23466956:-1 gene:ENSRNOG00000002914.7 transcript:ENSRNOT00000003941.7 gene_biotype:protein_coding transcript_biotype:protein_coding gene_symbol:Trmt1 description:tRNA methyltransferase 1 [Sour	3	4	4	4	12.1	69.372	141150	172640	140350	151380	205750	136860	168110	170240	0.889215	0.450485
ENSRNOP00000003965	ATP synthase F1 subunit beta	Atp5f1b	ENSRNOP00000003965.3	ENSRNOP00000003965.3 pep primary_assembly:mRatBN7.2:7:515460:567273:1 gene:ENSRNOG00000002840.5 transcript:ENSRNOT00000003965.5 gene_biotype:protein_coding transcript_biotype:protein_coding gene_symbol:Atp5f1b description:ATP synthase F1 subunit beta [Sour	1	31	31	31	84.5	56.344	310430000	293070000	341240000	3.14913e+08	315430000	319560000	312940000	3.15977e+08	0.996635	0.943969
ENSRNOP00000003987	mitogen-activated protein kinas	Mapk9	ENSRNOP00000003987.3;ENSRNOP00000087042.1;ENSRNOP00000090510.1;ENSRNOP00000070771.2;ENSRNOP00000097678.1;ENSRNOP00000085365.1	ENSRNOP00000003987.3 pep primary_assembly:mRatBN7.2:10:34169683:34210178:1 gene:ENSRNOG00000002823.9 transcript:ENSRNOT00000003987.6 gene_biotype:protein_coding transcript_biotype:protein_coding gene_symbol:Mapk9 description:mitogen-activated protein kinas	6	7	1	1	28.9	43.905	27110	28169		27639.5	48216		39152	43684	0.632714	0.0722231
ENSRNOP00000087921	stromal interaction molecule 2	Stim2	ENSRNOP00000087921.1;ENSRNOP00000004006.7;ENSRNOP00000089061.1	ENSRNOP00000087921.1 pep primary_assembly:mRatBN7.2:14:56878645:57004179:-1 gene:ENSRNOG00000002956.8 transcript:ENSRNOT00000119766.1 gene_biotype:protein_coding transcript_biotype:protein_coding gene_symbol:Stim2 description:stromal interaction molecule 2	3	13	13	12	30.2	90.796	701620	718860	500900	640460	711250	601810	652990	655350	0.977279	0.85566
ENSRNOP00000089882	phosphatidylglycerophosphate s	Pgs1	ENSRNOP00000089882.1;ENSRNOP00000004007.7	ENSRNOP00000089882.1 pep primary_assembly:mRatBN7.2:10:103224387:103250254:1 gene:ENSRNOG00000002949.8 transcript:ENSRNOT00000102092.1 gene_biotype:protein_coding transcript_biotype:protein_coding gene_symbol:Pgs1 description:phosphatidylglycerophosphate s	2	9	9	9	22.1	61.232	532760	541620	492870	522417	650580	581910	498160	576883	0.905585	0.306951
ENSRNOP00000004010	mitogen-activated protein kinas	Mapk9	ENSRNOP00000004010.4	ENSRNOP00000004010.4 pep primary_assembly:mRatBN7.2:10:34169683:34210178:1 gene:ENSRNOG00000002823.9 transcript:ENSRNOT00000004010.5 gene_biotype:protein_coding transcript_biotype:protein_coding gene_symbol:Mapk9 description:mitogen-activated protein kinas	1	7	4	0	26.8	44.077	262940	337800	282450	294397	305150	236900	280550	274200	1.07366	0.537901
ENSRNOP00000004023	translocase of inner mitochon	Timmdc1	ENSRNOP00000004023.4	ENSRNOP00000004023.4 pep primary_assembly:mRatBN7.2:11:62229058:62254699:1 gene:ENSRNOG00000002999.6 transcript:ENSRNOT00000004023.6 gene_biotype:protein_coding transcript_biotype:protein_coding gene_symbol:Timmdc1 description:translocase of inner mitochon	1	2	2	2	10	31.56	100820	92890	113530	102413	112320	99350	96447	102706	0.997154	0.971691
ENSRNOP00000089905	TBC1 domain family, member 1	Tbc1d19	ENSRNOP00000089905.1;ENSRNOP00000081767.1;ENSRNOP00000004030.5	ENSRNOP00000089905.1 pep primary_assembly:mRatBN7.2:14:57084311:57200202:-1 gene:ENSRNOG00000003003.7 transcript:ENSRNOT00000114945.1 gene_biotype:protein_coding transcript_biotype:protein_coding gene_symbol:Tbc1d19 description:TBC1 domain family, member 1	3	1	1	1	3.1	59.41	10314	19886		15100	18450	22357	13953	18253.3	0.827246	0.554146
ENSRNOP00000004042	RAD23 homolog A, nucleotide ex	Rad23a	ENSRNOP00000004042.5	ENSRNOP00000004042.5 pep primary_assembly:mRatBN7.2:19:23314797:23320695:1 gene:ENSRNOG00000003026.8 transcript:ENSRNOT00000004042.6 gene_biotype:protein_coding transcript_biotype:protein_coding gene_symbol:Rad23a description:RAD23 homolog A, nucleotide ex	1	5	4	4	21.7	39.338	283740	320660	310170	304857	291450	320280	182080	264603	1.15213	0.407172
ENSRNOP00000096877	N-myristoyltransferase 1	Nmt1	ENSRNOP00000096877.1;ENSRNOP00000004046.5;ENSRNOP00000097680.1	ENSRNOP00000096877.1 pep primary_assembly:mRatBN7.2:10:87988826:88022648:1 gene:ENSRNOG00000002989.7 transcript:ENSRNOT00000099456.1 gene_biotype:protein_coding transcript_biotype:protein_coding gene_symbol:Nmt1 description:N-myristoyltransferase 1 [Source	3	10	10	7	30.3	57.226	2751300	3002200	2458600	2.73737e+06	2854900	2825400	2751500	2810600	0.973944	0.671035
ENSRNOP00000004078	ATPase plasma membrane Ca2+ t	Atp2b4	ENSRNOP00000004078.6;ENSRNOP00000080557.1;ENSRNOP00000039880.5;ENSRNOP00000096209.1	ENSRNOP00000004078.6 pep primary_assembly:mRatBN7.2:13:45159960:45206872:-1 gene:ENSRNOG00000003031.8 transcript:ENSRNOT00000004078.7 gene_biotype:protein_coding transcript_biotype:protein_coding gene_symbol:Atp2b4 description:ATPase plasma membrane Ca2+ t	4	41	29	29	41.7	128.79	1786900	2518100	7342300	3.88243e+06	2665100	5671900	3307600	3.88153e+06	1.00023	0.999657
ENSRNOP00000004121	CD38 molecule	Cd38	ENSRNOP00000004121.1;ENSRNOP00000082585.1	ENSRNOP00000004121.1 pep primary_assembly:mRatBN7.2:14:67172063:67211986:-1 gene:ENSRNOG00000003069.5 transcript:ENSRNOT00000004121.5 gene_biotype:protein_coding transcript_biotype:protein_coding gene_symbol:Cd38 description:CD38 molecule [Source:RGD Symbo	2	5	5	5	21.5	34.436	298000	329210	183910	270373	422200	359540	318490	366743	0.737228	0.145865
ENSRNOP00000004127	centromere protein V	Cenpv	ENSRNOP00000004127.8	ENSRNOP00000004127.8 pep primary_assembly:mRatBN7.2:10:47214490:47228761:-1 gene:ENSRNOG00000003086.8 transcript:ENSRNOT00000004127.8 gene_biotype:protein_coding transcript_biotype:protein_coding gene_symbol:Cenpv description:centromere protein V [Source:R	1	8	8	8	49.2	27.516	1442800	1706100	1377800	1508900	1386200	1296300	1287900	1.32347e+06	1.14011	0.152693
ENSRNOP00000091874	phospholipase C, delta 3	Plcd3	ENSRNOP00000091874.1;ENSRNOP00000004140.4	ENSRNOP00000091874.1 pep primary_assembly:mRatBN7.2:10:88026740:88048296:-1 gene:ENSRNOG00000003033.6 transcript:ENSRNOT00000099178.1 gene_biotype:protein_coding transcript_biotype:protein_coding gene_symbol:Plcd3 description:phospholipase C, delta 3 [Sour	2	4	4	4	7.7	84.595	387290	247750	271590	302210	306810	385610	357230	349883	0.863745	0.384514
ENSRNOP00000091780	glyoxylate reductase 1 homolog	Glyr1	ENSRNOP00000091780.1;ENSRNOP00000090372.1;ENSRNOP00000004159.5;ENSRNOP00000078810.1	ENSRNOP00000091780.1 pep primary_assembly:mRatBN7.2:10:10532182:10567637:1 gene:ENSRNOG00000003065.6 transcript:ENSRNOT00000104888.1 gene_biotype:protein_coding transcript_biotype:protein_coding gene_symbol:Glyr1 description:glyoxylate reductase 1 homolog	4	2	2	2	6.1	48.248	95968	91032	80981	89327	82140	72412	71138	75230	1.18739	0.0659826
ENSRNOP00000004172	SLC9A3 regulator 2	Slc9a3r2	ENSRNOP00000004172.2;ENSRNOP00000080200.1;ENSRNOP00000095231.1;ENSRNOP00000085544.1	ENSRNOP00000004172.2 pep primary_assembly:mRatBN7.2:10:13662461:13672975:-1 gene:ENSRNOG00000002997.7 transcript:ENSRNOT00000004172.5 gene_biotype:protein_coding transcript_biotype:protein_coding gene_symbol:Slc9a3r2 description:SLC9A3 regulator 2 [Source:	4	10	10	10	46	37.35	572740	567170	537990	559300	639270	617990	579230	612163	0.913645	0.0623574
ENSRNOP00000004173	SPRY domain containing 4	Spryd4	ENSRNOP00000004173.2;ENSRNOP00000090225.1	ENSRNOP00000004173.2 pep primary_assembly:mRatBN7.2:7:633394:635379:-1 gene:ENSRNOG00000003127.5 transcript:ENSRNOT00000004173.5 gene_biotype:protein_coding transcript_biotype:protein_coding gene_symbol:Spryd4 description:SPRY domain containing 4 [Source:R	2	7	7	7	44.4	23.249	649020	669990	1150500	823170	727440	784850	859280	790523	1.0413	0.855531
ENSRNOP00000004174	GC, vitamin D binding protein	Gc	ENSRNOP00000004174.2;ENSRNOP00000083512.1	ENSRNOP00000004174.2 pep primary_assembly:mRatBN7.2:14:18632135:18667567:1 gene:ENSRNOG00000003119.5 transcript:ENSRNOT00000004174.5 gene_biotype:protein_coding transcript_biotype:protein_coding gene_symbol:Gc description:GC, vitamin D binding protein [Sou	2	3	3	3	10.7	53.518	41933	26839	38235	35669		34485	57113	45799	0.778816	0.396733
ENSRNOP00000004176	rogdi atypical leucine zipper [	Rogdi	ENSRNOP00000004176.5;ENSRNOP00000094238.1;ENSRNOP00000079432.1	ENSRNOP00000004176.5 pep primary_assembly:mRatBN7.2:10:10567834:10572452:1 gene:ENSRNOG00000003125.6 transcript:ENSRNOT00000004176.6 gene_biotype:protein_coding transcript_biotype:protein_coding gene_symbol:Rogdi description:rogdi atypical leucine zipper [	3	11	11	11	45.6	32.205	3535500	3724000	3469100	3576200	4250000	4121800	3286100	3.88597e+06	0.920286	0.376575
ENSRNOP00000004191	BTB domain containing 17	Btbd17	ENSRNOP00000004191.2	ENSRNOP00000004191.2 pep primary_assembly:mRatBN7.2:10:99826132:99832624:-1 gene:ENSRNOG00000003109.4 transcript:ENSRNOT00000004191.4 gene_biotype:protein_coding transcript_biotype:protein_coding gene_symbol:Btbd17 description:BTB domain containing 17 [Sou	1	7	7	7	21.1	55.406	762270	796790	552870	703977	708420	683130	870260	753937	0.933734	0.630747
ENSRNOP00000093390	cytohesin 1	Cyth1	ENSRNOP00000093390.1;ENSRNOP00000004196.6;ENSRNOP00000075144.2	ENSRNOP00000093390.1 pep primary_assembly:mRatBN7.2:10:103402728:103485760:-1 gene:ENSRNOG00000043381.4 transcript:ENSRNOT00000108086.1 gene_biotype:protein_coding transcript_biotype:protein_coding gene_symbol:Cyth1 description:cytohesin 1 [Source:RGD Symb	3	3	2	2	13.6	44.805	75205	52621	83373	70399.7	66772	57753	77921	67482	1.04324	0.802016
ENSRNOP00000004206	mitochondrial pyruvate carrier 2	Mpc2	ENSRNOP00000004206.6;ENSRNOP00000094616.1	ENSRNOP00000004206.6 pep primary_assembly:mRatBN7.2:13:77728250:77747664:1 gene:ENSRNOG00000003150.8 transcript:ENSRNOT00000004206.8 gene_biotype:protein_coding transcript_biotype:protein_coding gene_symbol:Mpc2 description:mitochondrial pyruvate carrier 2	2	5	5	5	34.6	14.258	1290200	1496900	1417000	1.40137e+06	2033800	1942300	1505400	1.82717e+06	0.766962	0.070438
ENSRNOP00000004228	succinate dehydrogenase complex	Sdhc	ENSRNOP00000004228.5;ENSRNOP00000077353.1;ENSRNOP00000083218.1	ENSRNOP00000004228.5 pep primary_assembly:mRatBN7.2:13:83544652:83566253:-1 gene:ENSRNOG00000003163.6 transcript:ENSRNOT00000004228.6 gene_biotype:protein_coding transcript_biotype:protein_coding gene_symbol:Sdhc description:succinate dehydrogenase complex	3	4	4	4	21.9	18.202	1279800	1461500	1734700	1492000	1338600	1330200	1264700	1.31117e+06	1.13792	0.249232
ENSRNOP00000004232	poly (ADP-ribose) polymerase 1	Parp1	ENSRNOP00000004232.3	ENSRNOP00000004232.3 pep primary_assembly:mRatBN7.2:13:92307586:92339404:1 gene:ENSRNOG00000003084.6 transcript:ENSRNOT00000004232.6 gene_biotype:protein_coding transcript_biotype:protein_coding gene_symbol:Parp1 description:poly (ADP-ribose) polymerase 1	1	5	5	5	8.6	112.66	144320	163270	133340	146977	148700	133790	120480	134323	1.0942	0.349441
ENSRNOP00000004248	transient receptor potential ca	Trpv2	ENSRNOP00000004248.4	ENSRNOP00000004248.4 pep primary_assembly:mRatBN7.2:10:47272931:47294260:1 gene:ENSRNOG00000003104.8 transcript:ENSRNOT00000004248.7 gene_biotype:protein_coding transcript_biotype:protein_coding gene_symbol:Trpv2 description:transient receptor potential ca	1	9	9	9	17.2	86.729	266540	241740	505160	337813	455650	491170	356060	434293	0.777846	0.359093
ENSRNOP00000084010	methionine adenosyltransferase	Mat2b	ENSRNOP00000084010.1;ENSRNOP00000068549.2;ENSRNOP00000004269.6	ENSRNOP00000084010.1 pep primary_assembly:mRatBN7.2:10:25107158:25122777:-1 gene:ENSRNOG00000003177.8 transcript:ENSRNOT00000118093.1 gene_biotype:protein_coding transcript_biotype:protein_coding gene_symbol:Mat2b description:methionine adenosyltransferase	3	5	5	5	23.2	36.236	786580	709400	696340	730773	775080	806240	681330	754217	0.968917	0.643585
ENSRNOP00000087570	transmembrane anterior posterio	Tapt1	ENSRNOP00000087570.1;ENSRNOP00000004274.7	ENSRNOP00000087570.1 pep primary_assembly:mRatBN7.2:14:66873459:66919741:1 gene:ENSRNOG00000003174.8 transcript:ENSRNOT00000097098.1 gene_biotype:protein_coding transcript_biotype:protein_coding gene_symbol:Tapt1 description:transmembrane anterior posterio	2	2	2	2	6.2	64.027	141710	108270	130450	126810	139250	128920	121280	129817	0.976839	0.800208
ENSRNOP00000004278	ribosomal protein S4, X-linked	Rps4x	ENSRNOP00000004278.6;ENSRNOP00000043988.3;ENSRNOP00000067969.2;ENSRNOP00000049546.3	ENSRNOP00000004278.6 pep primary_assembly:mRatBN7.2:X:67298525:67302922:-1 gene:ENSRNOG00000003201.10 transcript:ENSRNOT00000004278.7 gene_biotype:protein_coding transcript_biotype:protein_coding gene_symbol:Rps4x description:ribosomal protein S4, X-linked	4	15	15	15	56.3	27.504	6037200	5945700	5792100	5925000	5961200	6024300	6348400	6111300	0.969515	0.253044
ENSRNOP00000004283	proteasome 26S subunit, non-AT	Psmd12	ENSRNOP00000004283.2;ENSRNOP00000090235.1;ENSRNOP00000089687.1;ENSRNOP00000085777.1	ENSRNOP00000004283.2 pep primary_assembly:mRatBN7.2:10:92438298:92457287:1 gene:ENSRNOG00000003117.7 transcript:ENSRNOT00000004283.5 gene_biotype:protein_coding transcript_biotype:protein_coding gene_symbol:Psmd12 description:proteasome 26S subunit, non-AT	4	20	20	20	47.6	52.936	2714600	2870700	3001200	2.86217e+06	2731100	2832100	2735800	2.76633e+06	1.03464	0.342871
ENSRNOP00000004293	acyl-CoA binding domain contain	Acbd3	ENSRNOP00000004293.5	ENSRNOP00000004293.5 pep primary_assembly:mRatBN7.2:13:92455655:92483380:1 gene:ENSRNOG00000003185.6 transcript:ENSRNOT00000004293.6 gene_biotype:protein_coding transcript_biotype:protein_coding gene_symbol:Acbd3 description:acyl-CoA binding domain contain	1	6	6	6	14.3	67.194	237840	210860	204050	217583	229850	243100	223090	232013	0.937805	0.291079
ENSRNOP00000004314	nudix hydrolase 16 like 1 [	Nudt16l1	ENSRNOP00000004314.5;ENSRNOP00000085011.1	ENSRNOP00000004314.5 pep primary_assembly:mRatBN7.2:10:10636707:10638107:-1 gene:ENSRNOG00000003224.7 transcript:ENSRNOT00000004314.7 gene_biotype:protein_coding transcript_biotype:protein_coding gene_symbol:Nudt16l1 description:nudix hydrolase 16 like 1 [	2	4	4	4	29.6	22.106	80837	96835	111820	96497.3	93671	89463	80207	87780.3	1.0993	0.423555
ENSRNOP00000004319	delta(4)-desaturase, sphingoli	Degs1	ENSRNOP00000004319.2	ENSRNOP00000004319.2 pep primary_assembly:mRatBN7.2:13:93946157:93953664:-1 gene:ENSRNOG00000003223.4 transcript:ENSRNOT00000004319.4 gene_biotype:protein_coding transcript_biotype:protein_coding gene_symbol:Degs1 description:delta(4)-desaturase, sphingoli	1	3	3	3	10.5	38.055	102660	83039	63000	82899.7	98756	65629	133890	99425	0.833791	0.50857
ENSRNOP00000004329	H3.3 histone B	H3f3a	ENSRNOP00000004329.4;ENSRNOP00000040434.3;ENSRNOP00000060626.1;ENSRNOP00000084917.1;ENSRNOP00000088509.1;ENSRNOP00000092132.1;ENSRNOP00000096532.1;ENSRNOP00000096183.1;ENSRNOP00000095762.1;ENSRNOP00000095562.1;ENSRNOP00000095460.1;ENSRNOP00000084665.1;ENSRNOP00000091493.1;ENSRNOP00000094970.1;ENSRNOP00000080387.1;ENSRNOP00000080297.1;ENSRNOP00000086146.1;ENSRNOP00000073598.1;ENSRNOP00000078887.1	ENSRNOP00000004329.4 pep primary_assembly:mRatBN7.2:13:92533298:92544908:-1 gene:ENSRNOG00000003220.8 transcript:ENSRNOT00000004329.8 gene_biotype:protein_coding transcript_biotype:protein_coding gene_symbol:H3f3a description:H3.3 histone B [Source:RGD Sym	19	5	5	5	43.4	15.328	6086100	5442300	2381800	4.63673e+06	4812400	6667200	7686500	6388700	0.725771	0.284524
ENSRNOP00000086362	tumor protein p53 binding pro	Tp53bp2	ENSRNOP00000086362.1;ENSRNOP00000094906.1;ENSRNOP00000004330.6;ENSRNOP00000095274.1	ENSRNOP00000086362.1 pep primary_assembly:mRatBN7.2:13:94115136:94145432:1 gene:ENSRNOG00000003237.8 transcript:ENSRNOT00000106232.1 gene_biotype:protein_coding transcript_biotype:protein_coding gene_symbol:Tp53bp2 description:tumor protein p53 binding pro	4	1	1	1	2	115.02	121180	88410	117320	108970	118070	121540	78948	106186	1.02622	0.878767
ENSRNOP00000004346	bMERB domain containing 1	Bmerb1	ENSRNOP00000004346.6;ENSRNOP00000092673.1;ENSRNOP00000077488.1	ENSRNOP00000004346.6 pep primary_assembly:mRatBN7.2:10:1779835:1946575:-1 gene:ENSRNOG00000003198.7 transcript:ENSRNOT00000004346.7 gene_biotype:protein_coding transcript_biotype:protein_coding gene_symbol:Bmerb1 description:bMERB domain containing 1 [Sour	3	2	2	2	14.3	23.42	81926	85881	82031	83279.3	87883	100610	80402	89631.7	0.929128	0.352307
ENSRNOP00000004347			ENSRNOP00000004347.4;ENSRNOP00000097708.1	ENSRNOP00000004347.4 pep primary_assembly:mRatBN7.2:13:83588992:83591797:-1 gene:ENSRNOG00000003209.7 transcript:ENSRNOT00000004347.6 gene_biotype:protein_coding transcript_biotype:protein_coding;ENSRNOP00000097708.1 pep primary_assembly:mRatBN7.2:13:83588	2	1	1	1	20.6	7.4632	93889	90924	76484	87099	101440	109790	78566	96598.7	0.901658	0.427593
ENSRNOP00000004351	SLC9A3 regulator 1	Slc9a3r1	ENSRNOP00000004351.1	ENSRNOP00000004351.1 pep primary_assembly:mRatBN7.2:10:100403069:100420598:1 gene:ENSRNOG00000003232.5 transcript:ENSRNOT00000004351.5 gene_biotype:protein_coding transcript_biotype:protein_coding gene_symbol:Slc9a3r1 description:SLC9A3 regulator 1 [Source	1	18	18	18	62.6	38.83	4671800	4295900	3669200	4212300	4594500	4070700	3647000	4.10407e+06	1.02637	0.800466
ENSRNOP00000004364	structural maintenance of chromo	Smc1a	ENSRNOP00000004364.7	ENSRNOP00000004364.7 pep primary_assembly:mRatBN7.2:X:21103282:21148056:1 gene:ENSRNOG00000003139.8 transcript:ENSRNOT00000004364.8 gene_biotype:protein_coding transcript_biotype:protein_coding gene_symbol:Smc1a description:structural maintenance of chromo	1	6	6	6	6	143.2	136480	131030	76776	114762	119930	110930	81740	104200	1.10136	0.660075
ENSRNOP00000080885	phenylalanyl-tRNA synthetase s	Farsa	ENSRNOP00000080885.1;ENSRNOP00000080009.1;ENSRNOP00000004370.4;ENSRNOP00000076655.1	ENSRNOP00000080885.1 pep primary_assembly:mRatBN7.2:19:23291416:23300979:-1 gene:ENSRNOG00000003149.8 transcript:ENSRNOT00000111986.1 gene_biotype:protein_coding transcript_biotype:protein_coding gene_symbol:Farsa description:phenylalanyl-tRNA synthetase s	4	10	10	10	33.3	52.621	727420	764550	680990	724320	760870	734030	754390	749763	0.966065	0.374655
ENSRNOP00000004379	pyrroline-5-carboxylate reducta	Pycr2	ENSRNOP00000004379.4;ENSRNOP00000093202.1;ENSRNOP00000092681.1;ENSRNOP00000051832.4	ENSRNOP00000004379.4 pep primary_assembly:mRatBN7.2:13:92626471:92634184:1 gene:ENSRNOG00000003267.6 transcript:ENSRNOT00000004379.6 gene_biotype:protein_coding transcript_biotype:protein_coding gene_symbol:Pycr2 description:pyrroline-5-carboxylate reducta	4	6	6	6	26.7	37.924	380060	398600	469940	416200	512540	466930	406150	461873	0.901113	0.330131
ENSRNOP00000004385	quinoid dihydropteridine reducta	Qdpr	ENSRNOP00000004385.3;ENSRNOP00000097613.1	ENSRNOP00000004385.3 pep primary_assembly:mRatBN7.2:14:65670131:65683854:1 gene:ENSRNOG00000003253.5 transcript:ENSRNOT00000004385.5 gene_biotype:protein_coding transcript_biotype:protein_coding gene_symbol:Qdpr description:quinoid dihydropteridine reducta	2	10	10	10	49.3	31.101	25862000	22916000	15796000	2.15247e+07	20664000	17831000	20224000	19573000	1.09971	0.564927
ENSRNOP00000092374	solute carrier family 4 membe	Slc4a4	ENSRNOP00000092374.1;ENSRNOP00000004391.4;ENSRNOP00000089282.1;ENSRNOP00000035006.2	ENSRNOP00000092374.1 pep primary_assembly:mRatBN7.2:14:18845159:19272883:-1 gene:ENSRNOG00000003134.5 transcript:ENSRNOT00000101333.1 gene_biotype:protein_coding transcript_biotype:protein_coding gene_symbol:Slc4a4 description:solute carrier family 4 membe	4	23	23	22	26.3	123.55	10259000	10088000	11134000	1.04937e+07	10077000	11789000	10232000	1.06993e+07	0.980778	0.762412
ENSRNOP00000004400	epsin 3	Epn3	ENSRNOP00000004400.4;ENSRNOP00000087165.1	ENSRNOP00000004400.4 pep primary_assembly:mRatBN7.2:10:79438978:79447356:-1 gene:ENSRNOG00000003284.7 transcript:ENSRNOT00000004400.6 gene_biotype:protein_coding transcript_biotype:protein_coding gene_symbol:Epn3 description:epsin 3 [Source:RGD Symbol;Acc:	2	2	1	1	3.6	65.047	99259	116880	68875	95004.7	106220	97921	77410	93850.3	1.0123	0.947354
ENSRNOP00000004416	mahogunin ring finger 1	Mgrn1	ENSRNOP00000004416.6;ENSRNOP00000095969.1;ENSRNOP00000077703.1;ENSRNOP00000078796.1;ENSRNOP00000071642.2;ENSRNOP00000093009.1;ENSRNOP00000066237.3;ENSRNOP00000064600.3;ENSRNOP00000083126.1;ENSRNOP00000092170.1	ENSRNOP00000004416.6 pep primary_assembly:mRatBN7.2:10:10638880:10688269:-1 gene:ENSRNOG00000003234.8 transcript:ENSRNOT00000004416.7 gene_biotype:protein_coding transcript_biotype:protein_coding gene_symbol:Mgrn1 description:mahogunin ring finger 1 [Sourc	10	8	8	8	24.2	58.531	386070	349290	371420	368927	416980	364080	339850	373637	0.987394	0.860597
ENSRNOP00000004486	CASK interacting protein 1	Caskin1	ENSRNOP00000004486.2;ENSRNOP00000039956.5;ENSRNOP00000082739.1	ENSRNOP00000004486.2 pep primary_assembly:mRatBN7.2:10:13513465:13533377:1 gene:ENSRNOG00000003195.9 transcript:ENSRNOT00000004486.6 gene_biotype:protein_coding transcript_biotype:protein_coding gene_symbol:Caskin1 description:CASK interacting protein 1 [S	3	38	38	36	46.4	150.26	6481600	6878100	7010100	6.78993e+06	7375100	7189800	7046400	7.20377e+06	0.942553	0.0890743
ENSRNOP00000091761	RNA binding fox-1 homolog 3	Rbfox3	ENSRNOP00000091761.1;ENSRNOP00000072266.2;ENSRNOP00000004524.4;ENSRNOP00000085442.1	ENSRNOP00000091761.1 pep primary_assembly:mRatBN7.2:10:103720636:104156935:-1 gene:ENSRNOG00000003386.8 transcript:ENSRNOT00000120132.1 gene_biotype:protein_coding transcript_biotype:protein_coding gene_symbol:Rbfox3 description:RNA binding fox-1 homolog 3	4	2	1	1	9.6	34.051	43432	39175	65739	49448.7	44583	58401	72639	58541	0.844684	0.475259
ENSRNOP00000004551	G-rich RNA sequence binding fac	Grsf1	ENSRNOP00000004551.7;ENSRNOP00000068892.1;ENSRNOP00000080427.1	ENSRNOP00000004551.7 pep primary_assembly:mRatBN7.2:14:19413525:19429129:1 gene:ENSRNOG00000003392.8 transcript:ENSRNOT00000004551.8 gene_biotype:protein_coding transcript_biotype:protein_coding gene_symbol:Grsf1 description:G-rich RNA sequence binding fac	3	7	7	7	29.6	41.472	256750	291920	342820	297163	327380	338050	293810	319747	0.929371	0.469819
ENSRNOP00000004609	myosin ID	Myo1d	ENSRNOP00000004609.3;ENSRNOP00000091463.1;ENSRNOP00000085457.1;ENSRNOP00000073777.1	ENSRNOP00000004609.3 pep primary_assembly:mRatBN7.2:10:65489154:65765812:-1 gene:ENSRNOG00000003276.6 transcript:ENSRNOT00000004609.5 gene_biotype:protein_coding transcript_biotype:protein_coding gene_symbol:Myo1d description:myosin ID [Source:RGD Symbol;A	4	37	37	37	42.2	116.09	7303300	7259500	3709400	6.09073e+06	6022800	4379500	5149000	5.18377e+06	1.17496	0.518279
ENSRNOP00000004613	cell adhesion molecule 3	Cadm3	ENSRNOP00000004613.5;ENSRNOP00000091652.1;ENSRNOP00000083207.1;ENSRNOP00000074496.2	ENSRNOP00000004613.5 pep primary_assembly:mRatBN7.2:13:85786483:85797548:-1 gene:ENSRNOG00000003365.7 transcript:ENSRNOT00000004613.7 gene_biotype:protein_coding transcript_biotype:protein_coding gene_symbol:Cadm3 description:cell adhesion molecule 3 [Sour	4	16	16	16	54.9	41.112	7695600	8349300	7476200	7.84037e+06	7852200	8092600	6838100	7594300	1.0324	0.624933
ENSRNOP00000084822	translocase of outer mitocho	Tomm40l	ENSRNOP00000084822.1;ENSRNOP00000004641.1	ENSRNOP00000084822.1 pep primary_assembly:mRatBN7.2:13:83638195:83641654:-1 gene:ENSRNOG00000003398.4 transcript:ENSRNOT00000111315.1 gene_biotype:protein_coding transcript_biotype:protein_coding gene_symbol:Tomm40l description:translocase of outer mitocho	2	5	5	5	24.5	30.42	529120	459470	472710	487100	544520	519410	606480	556803	0.874815	0.106302
ENSRNOP00000004646	microtubule associated serine/t	MAST1	ENSRNOP00000004646.2;ENSRNOP00000096589.1;ENSRNOP00000091880.1;ENSRNOP00000069015.2;ENSRNOP00000081749.1;ENSRNOP00000086302.1;ENSRNOP00000079306.1;ENSRNOP00000097145.1;ENSRNOP00000072064.2	ENSRNOP00000004646.2 pep primary_assembly:mRatBN7.2:19:23207991:23244235:1 gene:ENSRNOG00000003469.8 transcript:ENSRNOT00000004646.4 gene_biotype:protein_coding transcript_biotype:protein_coding gene_symbol:MAST1 description:microtubule associated serine/t	9	15	15	13	13.2	171.03	557700	547570	604490	569920	600930	611170	534570	582223	0.978868	0.700205
ENSRNOP00000004673	acyl-CoA synthetase family mem	Acsf2	ENSRNOP00000004673.3;ENSRNOP00000086908.1;ENSRNOP00000095809.1	ENSRNOP00000004673.3 pep primary_assembly:mRatBN7.2:10:79504511:79546673:-1 gene:ENSRNOG00000003330.5 transcript:ENSRNOT00000004673.5 gene_biotype:protein_coding transcript_biotype:protein_coding gene_symbol:Acsf2 description:acyl-CoA synthetase family mem	3	21	21	21	44.7	67.886	2882800	2579100	3073900	2.84527e+06	2734700	2981000	2618600	2778100	1.02418	0.727054
ENSRNOP00000051949	protein kinase C, alpha	Prkca	ENSRNOP00000051949.5;ENSRNOP00000004699.8;ENSRNOP00000079110.1;ENSRNOP00000091320.1;ENSRNOP00000083509.1	ENSRNOP00000051949.5 pep primary_assembly:mRatBN7.2:10:92894012:93287807:-1 gene:ENSRNOG00000003491.9 transcript:ENSRNOT00000055073.5 gene_biotype:protein_coding transcript_biotype:protein_coding gene_symbol:Prkca description:protein kinase C, alpha [Sourc	5	29	16	16	49.4	72.782	7538700	7785800	4728800	6.68443e+06	6368500	5780600	5507000	5.88537e+06	1.13577	0.474272
ENSRNOP00000004701	Ro60, Y RNA binding protein	Ro60	ENSRNOP00000004701.4;ENSRNOP00000079108.1	ENSRNOP00000004701.4 pep primary_assembly:mRatBN7.2:13:55499534:55520504:-1 gene:ENSRNOG00000003434.8 transcript:ENSRNOT00000004701.8 gene_biotype:protein_coding transcript_biotype:protein_coding gene_symbol:Ro60 description:Ro60, Y RNA binding protein [So	2	8	8	8	25.3	60.042	740300	951840	721860	804667	754470	813220	623460	730383	1.1017	0.467738
ENSRNOP00000004703	neuronal pentraxin receptor [	Nptxr	ENSRNOP00000004703.4	ENSRNOP00000004703.4 pep primary_assembly:mRatBN7.2:7:111336664:111354802:-1 gene:ENSRNOG00000016156.7 transcript:ENSRNOT00000004703.6 gene_biotype:protein_coding transcript_biotype:protein_coding gene_symbol:Nptxr description:neuronal pentraxin receptor [	1	13	13	13	45.9	51.013	3799500	4012000	4787800	4.19977e+06	5130400	5243400	4441800	4.93853e+06	0.850408	0.131911
ENSRNOP00000004716	spectrin, alpha, erythrocytic 1	Spta1	ENSRNOP00000004716.7;ENSRNOP00000061853.4	ENSRNOP00000004716.7 pep primary_assembly:mRatBN7.2:13:86203504:86279371:1 gene:ENSRNOG00000003537.9 transcript:ENSRNOT00000004716.7 gene_biotype:protein_coding transcript_biotype:protein_coding gene_symbol:Spta1 description:spectrin, alpha, erythrocytic 1	2	4	3	3	2.4	271.21	175320	86988	71338	111215	113490	116260	93865	107872	1.031	0.924461
ENSRNOP00000004718	HID1 domain containing	Hid1	ENSRNOP00000004718.5	ENSRNOP00000004718.5 pep primary_assembly:mRatBN7.2:10:100589555:100610041:-1 gene:ENSRNOG00000003464.7 transcript:ENSRNOT00000004718.7 gene_biotype:protein_coding transcript_biotype:protein_coding gene_symbol:Hid1 description:HID1 domain containing [Sourc	1	5	5	5	8.6	88.625	373250	304760	292070	323360	329920	367030	408530	368493	0.877519	0.254217
ENSRNOP00000087140	elaC ribonuclease Z 2	Elac2	ENSRNOP00000087140.1;ENSRNOP00000004722.3;ENSRNOP00000092299.1	ENSRNOP00000087140.1 pep primary_assembly:mRatBN7.2:10:49632378:49655614:1 gene:ENSRNOG00000003424.5 transcript:ENSRNOT00000109544.1 gene_biotype:protein_coding transcript_biotype:protein_coding gene_symbol:Elac2 description:elaC ribonuclease Z 2 [Source:R	3	5	5	5	10.2	91.894	151050	155220	178290	161520	157110	165390	113810	145437	1.11059	0.424384
ENSRNOP00000004725	gamma-aminobutyric acid type	Gabra1	ENSRNOP00000004725.5;ENSRNOP00000087043.1	ENSRNOP00000004725.5 pep primary_assembly:mRatBN7.2:10:26595160:26650864:-1 gene:ENSRNOG00000003512.8 transcript:ENSRNOT00000004725.8 gene_biotype:protein_coding transcript_biotype:protein_coding gene_symbol:Gabra1 description:gamma-aminobutyric acid type	2	10	10	7	34.3	51.753	987600	1216700	1165100	1.12313e+06	1331700	1055300	940650	1.10922e+06	1.01255	0.922981
ENSRNOP00000004740	RUN and FYVE domain containing	Rufy1	ENSRNOP00000004740.5	ENSRNOP00000004740.5 pep primary_assembly:mRatBN7.2:10:34705741:34750644:-1 gene:ENSRNOG00000003536.6 transcript:ENSRNOT00000004740.6 gene_biotype:protein_coding transcript_biotype:protein_coding gene_symbol:Rufy1 description:RUN and FYVE domain containing	1	7	6	6	14.5	80.376	163700	74098	281520	173106	210730	125530	37336	124532	1.39005	0.568083
ENSRNOP00000004756	apolipoprotein H	Apoh	ENSRNOP00000004756.4	ENSRNOP00000004756.4 pep primary_assembly:mRatBN7.2:10:93310977:93356329:1 gene:ENSRNOG00000003566.8 transcript:ENSRNOT00000004756.8 gene_biotype:protein_coding transcript_biotype:protein_coding gene_symbol:Apoh description:apolipoprotein H [Source:RGD Sym	1	2	2	2	9	38.457	44036	28380	30792	34402.7	31060	37752	33341	34051	1.01033	0.949791
ENSRNOP00000004770	leucine aminopeptidase 3	Lap3	ENSRNOP00000004770.3;ENSRNOP00000091757.1	ENSRNOP00000004770.3 pep primary_assembly:mRatBN7.2:14:65608376:65627359:-1 gene:ENSRNOG00000003289.9 transcript:ENSRNOT00000004770.6 gene_biotype:protein_coding transcript_biotype:protein_coding gene_symbol:Lap3 description:leucine aminopeptidase 3 [Sourc	2	23	23	19	59.2	56.149	9293900	8597000	6979300	8.29007e+06	7153600	7305700	8210800	7556700	1.09705	0.389689
ENSRNOP00000004772	acyl-CoA binding domain contain	Acbd6	ENSRNOP00000004772.5;ENSRNOP00000085910.1;ENSRNOP00000096543.1	ENSRNOP00000004772.5 pep primary_assembly:mRatBN7.2:13:67726786:67862311:1 gene:ENSRNOG00000003550.7 transcript:ENSRNOT00000004772.7 gene_biotype:protein_coding transcript_biotype:protein_coding gene_symbol:Acbd6 description:acyl-CoA binding domain contain	3	10	10	10	47.2	30.81	960860	901990	967010	943287	932000	869250	935980	912410	1.03384	0.360707
ENSRNOP00000004776	RUN and FYVE domain containing	Rufy3	ENSRNOP00000004776.3;ENSRNOP00000073742.2;ENSRNOP00000020608.5;ENSRNOP00000078674.1	ENSRNOP00000004776.3 pep primary_assembly:mRatBN7.2:14:19432524:19490474:-1 gene:ENSRNOG00000003428.9 transcript:ENSRNOT00000004776.5 gene_biotype:protein_coding transcript_biotype:protein_coding gene_symbol:Rufy3 description:RUN and FYVE domain containing	4	22	22	4	39.6	69.942	4528800	5105500	5975700	5.20333e+06	4601700	5022300	5195000	4.93967e+06	1.05338	0.594074
ENSRNOP00000034917	epoxide hydrolase 1	Ephx1	ENSRNOP00000034917.6;ENSRNOP00000004780.2;ENSRNOP00000074206.2;ENSRNOP00000080132.1	ENSRNOP00000034917.6 pep primary_assembly:mRatBN7.2:13:92714316:92744054:-1 gene:ENSRNOG00000003515.7 transcript:ENSRNOT00000029787.6 gene_biotype:protein_coding transcript_biotype:protein_coding gene_symbol:Ephx1 description:epoxide hydrolase 1 [Source:RG	4	11	11	11	32.1	50.742	1013800	872040	699310	861717	913370	929400	1015700	952823	0.904382	0.397792
ENSRNOP00000004797	tubulin, alpha 4A	Tuba4a	ENSRNOP00000004797.5;ENSRNOP00000076468.1	ENSRNOP00000004797.5 pep primary_assembly:mRatBN7.2:9:76709614:76713918:-1 gene:ENSRNOG00000003597.6 transcript:ENSRNOT00000004797.6 gene_biotype:protein_coding transcript_biotype:protein_coding gene_symbol:Tuba4a description:tubulin, alpha 4A [Source:RGD	2	34	7	7	73.2	49.924	70563000	67930000	59608000	6.60337e+07	47406000	43766000	59723000	5.02983e+07	1.31284	0.054642
ENSRNOP00000004799	peroxiredoxin 2	Prdx2	ENSRNOP00000004799.2;ENSRNOP00000078297.1	ENSRNOP00000004799.2 pep primary_assembly:mRatBN7.2:19:23180930:23186194:-1 gene:ENSRNOG00000003520.6 transcript:ENSRNOT00000004799.6 gene_biotype:protein_coding transcript_biotype:protein_coding gene_symbol:Prdx2 description:peroxiredoxin 2 [Source:RGD Sy	2	14	14	14	71.2	21.797	35272000	31164000	29533000	3.19897e+07	29991000	29577000	30735000	30101000	1.06274	0.338928
ENSRNOP00000004808	dynein light chain Tctex-type 3	Dynlt3	ENSRNOP00000004808.5	ENSRNOP00000004808.5 pep primary_assembly:mRatBN7.2:X:13327892:13337139:1 gene:ENSRNOG00000003611.8 transcript:ENSRNOT00000004808.8 gene_biotype:protein_coding transcript_biotype:protein_coding gene_symbol:Dynlt3 description:dynein light chain Tctex-type 3	1	2	2	2	28.7	12.782	911910	739350	953290	868183	668390	668320	930630	755780	1.14872	0.361683
ENSRNOP00000096546	Rho GTPase activating prote	Arhgap44	ENSRNOP00000096546.1;ENSRNOP00000004829.8;ENSRNOP00000066638.2	ENSRNOP00000096546.1 pep primary_assembly:mRatBN7.2:10:49655584:49824297:-1 gene:ENSRNOG00000003603.9 transcript:ENSRNOT00000101528.1 gene_biotype:protein_coding transcript_biotype:protein_coding gene_symbol:Arhgap44 description:Rho GTPase activating prote	3	15	15	15	28.6	89.114	4170300	4153000	3619500	3.98093e+06	3914500	3336600	3483400	3.57817e+06	1.11256	0.183173
ENSRNOP00000004836	ATP synthase peripheral sta	Atp5pd	ENSRNOP00000004836.7;ENSRNOP00000082121.1;ENSRNOP00000084116.1;ENSRNOP00000094646.1;ENSRNOP00000048498.4	ENSRNOP00000004836.7 pep primary_assembly:mRatBN7.2:10:100657708:100663479:-1 gene:ENSRNOG00000003626.7 transcript:ENSRNOT00000004836.7 gene_biotype:protein_coding transcript_biotype:protein_coding gene_symbol:Atp5pd description:ATP synthase peripheral sta	5	16	16	16	36.7	37.547	33252000	33843000	41968000	3.63543e+07	36765000	37256000	34847000	3.62893e+07	1.00179	0.983229
ENSRNOP00000004854			ENSRNOP00000004854.8;ENSRNOP00000089411.1	ENSRNOP00000004854.8 pep primary_assembly:mRatBN7.2:X:49972330:50042056:1 gene:ENSRNOG00000003643.8 transcript:ENSRNOT00000004854.8 gene_biotype:protein_coding transcript_biotype:protein_coding;ENSRNOP00000089411.1 pep primary_assembly:mRatBN7.2:X:49972366	2	3	3	3	8	78.94	88381	96029	79387	87932.3	112110	94865	89273	98749.3	0.89046	0.266721
ENSRNOP00000004862	Jupiter microtubule associate	Jpt1	ENSRNOP00000004862.4;ENSRNOP00000096769.1;ENSRNOP00000078334.1	ENSRNOP00000004862.4 pep primary_assembly:mRatBN7.2:10:100744467:100762518:-1 gene:ENSRNOG00000003661.7 transcript:ENSRNOT00000004862.6 gene_biotype:protein_coding transcript_biotype:protein_coding gene_symbol:Jpt1 description:Jupiter microtubule associate	3	5	5	5	50.7	15.048	2359900	2542900	1817800	2240200	2789100	2489000	2113700	2.46393e+06	0.909197	0.486992
ENSRNOP00000004867	Jupiter microtubule associate	Jpt1	ENSRNOP00000004867.5;ENSRNOP00000044856.3;ENSRNOP00000084127.1;ENSRNOP00000093600.1;ENSRNOP00000047101.3	ENSRNOP00000004867.5 pep primary_assembly:mRatBN7.2:10:100772542:100784513:-1 gene:ENSRNOG00000003661.7 transcript:ENSRNOT00000004867.7 gene_biotype:protein_coding transcript_biotype:protein_coding gene_symbol:Jpt1 description:Jupiter microtubule associate	5	3	3	3	36.6	8.1111	1515900	1524900	1208800	1.41653e+06	1485900	1389500	1284400	1386600	1.02159	0.813917
ENSRNOP00000004873	midline 1	Mid1	ENSRNOP00000004873.5;ENSRNOP00000084119.1	ENSRNOP00000004873.5 pep primary_assembly:mRatBN7.2:X:24120293:24248353:-1 gene:ENSRNOG00000003613.8 transcript:ENSRNOT00000004873.7 gene_biotype:protein_coding transcript_biotype:protein_coding gene_symbol:Mid1 description:midline 1 [Source:RGD Symbol;Acc	2	2	2	2	4.9	75.21	44598	46571	39482	43550.3	61169	48940	45445	51851.3	0.839908	0.186581
ENSRNOP00000096311	UBX domain protein 4	Ubxn4	ENSRNOP00000096311.1;ENSRNOP00000004878.5;ENSRNOP00000078558.1;ENSRNOP00000079987.1	ENSRNOP00000096311.1 pep primary_assembly:mRatBN7.2:13:39743681:39772491:1 gene:ENSRNOG00000003625.8 transcript:ENSRNOT00000113122.1 gene_biotype:protein_coding transcript_biotype:protein_coding gene_symbol:Ubxn4 description:UBX domain protein 4 [Source:RG	4	5	5	5	24.6	51.208	423440	448650	456420	442837	395960	446380	371560	404633	1.09441	0.189185
ENSRNOP00000004881	ubiquitin C-terminal hydrolase	Uchl5	ENSRNOP00000004881.4;ENSRNOP00000094138.1;ENSRNOP00000072164.2	ENSRNOP00000004881.4 pep primary_assembly:mRatBN7.2:13:55520768:55556502:1 gene:ENSRNOG00000003545.8 transcript:ENSRNOT00000004881.7 gene_biotype:protein_coding transcript_biotype:protein_coding gene_symbol:Uchl5 description:ubiquitin C-terminal hydrolase	3	7	7	7	36.4	37.097	225300	299050	359010	294453	326870	352880	309910	329887	0.892589	0.432439
ENSRNOP00000004884	pirin	Pir	ENSRNOP00000004884.5;ENSRNOP00000083645.1;ENSRNOP00000096940.1	ENSRNOP00000004884.5 pep primary_assembly:mRatBN7.2:X:30108538:30219218:-1 gene:ENSRNOG00000003674.6 transcript:ENSRNOT00000004884.6 gene_biotype:protein_coding transcript_biotype:protein_coding gene_symbol:Pir description:pirin [Source:RGD Symbol;Acc:1359	3	3	3	3	17.9	32.178	310640	272400	370660	317900	244860	242080	234770	240570	1.32144	0.0546963
ENSRNOP00000062597	heterogeneous nuclear ribonu	Hnrnpab	ENSRNOP00000062597.3;ENSRNOP00000038183.5;ENSRNOP00000004885.5	ENSRNOP00000062597.3 pep primary_assembly:mRatBN7.2:10:35857042:35863344:-1 gene:ENSRNOG00000003645.9 transcript:ENSRNOT00000065584.4 gene_biotype:protein_coding transcript_biotype:protein_coding gene_symbol:Hnrnpab description:heterogeneous nuclear ribonu	3	9	9	8	31.2	32.653	2817900	2841600	2522500	2.72733e+06	2314000	2605800	2371400	2430400	1.12217	0.0944286
ENSRNOP00000004896	protoporphyrinogen oxidase	Ppox	ENSRNOP00000004896.5	ENSRNOP00000004896.5 pep primary_assembly:mRatBN7.2:13:83664891:83701805:-1 gene:ENSRNOG00000003567.7 transcript:ENSRNOT00000004896.7 gene_biotype:protein_coding transcript_biotype:protein_coding gene_symbol:Ppox description:protoporphyrinogen oxidase [Sou	1	6	6	6	17.6	52.062	241970	267350	287910	265743	259930	205930	279180	248347	1.07005	0.534618
ENSRNOP00000004911			ENSRNOP00000004911.4	ENSRNOP00000004911.4 pep primary_assembly:mRatBN7.2:X:66554098:66571952:1 gene:ENSRNOG00000003689.7 transcript:ENSRNOT00000004911.6 gene_biotype:protein_coding transcript_biotype:protein_coding	1	14	14	14	41.8	54.925	2092800	2132600	2062600	2096000	2035500	2081400	2024500	2.04713e+06	1.02387	0.141537
ENSRNOP00000004917	fumarate hydratase	Fh	ENSRNOP00000004917.3	ENSRNOP00000004917.3 pep primary_assembly:mRatBN7.2:13:87524337:87550266:-1 gene:ENSRNOG00000003653.6 transcript:ENSRNOT00000004917.6 gene_biotype:protein_coding transcript_biotype:protein_coding gene_symbol:Fh description:fumarate hydratase [Source:RGD Sy	1	18	18	18	55.8	54.464	11391000	11800000	14936000	12709000	13157000	12857000	11616000	1.25433e+07	1.01321	0.898134
ENSRNOP00000079736	polyribonucleotide nucleotidy	Pnpt1	ENSRNOP00000079736.1;ENSRNOP00000004919.5	ENSRNOP00000079736.1 pep primary_assembly:mRatBN7.2:14:102877553:102908696:1 gene:ENSRNOG00000003600.7 transcript:ENSRNOT00000108630.1 gene_biotype:protein_coding transcript_biotype:protein_coding gene_symbol:Pnpt1 description:polyribonucleotide nucleotidy	2	8	8	8	14.2	84.843	322950	348340	359550	343613	392380	403510	343930	379940	0.904388	0.162594
ENSRNOP00000004939	cornichon family AMPA receptor	Cnih4	ENSRNOP00000004939.5;ENSRNOP00000087381.1	ENSRNOP00000004939.5 pep primary_assembly:mRatBN7.2:13:92910357:92927853:1 gene:ENSRNOG00000003717.6 transcript:ENSRNOT00000004939.6 gene_biotype:protein_coding transcript_biotype:protein_coding gene_symbol:Cnih4 description:cornichon family AMPA receptor	2	1	1	1	14.4	16.091	26626	44574	32374	34524.7	29457	26342	31132	28977	1.19145	0.368201
ENSRNOP00000004941	leucine rich repeat containing	Lrrc59	ENSRNOP00000004941.2;ENSRNOP00000077689.1;ENSRNOP00000092425.1	ENSRNOP00000004941.2 pep primary_assembly:mRatBN7.2:10:79572317:79602533:1 gene:ENSRNOG00000003524.5 transcript:ENSRNOT00000004941.5 gene_biotype:protein_coding transcript_biotype:protein_coding gene_symbol:Lrrc59 description:leucine rich repeat containing	3	5	5	5	26.1	34.869	842930	1029100	793890	888640	1217900	1222900	794560	1.07845e+06	0.823995	0.298538
ENSRNOP00000091079	transmembrane p24 trafficking	Tmed7	ENSRNOP00000091079.1;ENSRNOP00000004942.5	ENSRNOP00000091079.1 pep primary_assembly:mRatBN7.2:18:39297351:39325640:-1 gene:ENSRNOG00000003691.6 transcript:ENSRNOT00000103895.1 gene_biotype:protein_coding transcript_biotype:protein_coding gene_symbol:Tmed7 description:transmembrane p24 trafficking	2	4	4	4	32.6	21.54	868590	1027800	1020000	972130	999820	1037300	829120	955413	1.0175	0.849137
ENSRNOP00000087465	ATP synthase mitochondrial F1	Atpaf2	ENSRNOP00000087465.1;ENSRNOP00000004948.5;ENSRNOP00000088751.1;ENSRNOP00000087334.1	ENSRNOP00000087465.1 pep primary_assembly:mRatBN7.2:10:45197441:45221026:-1 gene:ENSRNOG00000003719.6 transcript:ENSRNOT00000116769.1 gene_biotype:protein_coding transcript_biotype:protein_coding gene_symbol:Atpaf2 description:ATP synthase mitochondrial F1	4	2	2	2	11.9	31.781		53166	92034	72600	92784	79471	79574	83943	0.864873	0.518989
ENSRNOP00000083901	fibronectin leucine rich trans	Flrt2	ENSRNOP00000083901.1;ENSRNOP00000079728.1;ENSRNOP00000076725.1;ENSRNOP00000004955.4	ENSRNOP00000083901.1 pep primary_assembly:mRatBN7.2:6:114777599:114872785:1 gene:ENSRNOG00000003732.5 transcript:ENSRNOT00000113363.1 gene_biotype:protein_coding transcript_biotype:protein_coding gene_symbol:Flrt2 description:fibronectin leucine rich trans	4	2	2	2	4.8	73.873	38039	42500	29656	36731.7	45698	22991	37318	35335.7	1.03951	0.86362
ENSRNOP00000067941	zinc finger MYM-type containing	Zmym3	ENSRNOP00000067941.2;ENSRNOP00000082467.1;ENSRNOP00000004972.5;ENSRNOP00000088523.1	ENSRNOP00000067941.2 pep primary_assembly:mRatBN7.2:X:66539412:66544782:-1 gene:ENSRNOG00000003707.9 transcript:ENSRNOT00000076008.3 gene_biotype:protein_coding transcript_biotype:protein_coding gene_symbol:Zmym3 description:zinc finger MYM-type containing	4	2	2	2	6	52.973	146280	132020	133050	137117	142850	165950	117990	142263	0.963823	0.742064
ENSRNOP00000005006	transmembrane protein 163	Tmem163	ENSRNOP00000005006.4	ENSRNOP00000005006.4 pep primary_assembly:mRatBN7.2:13:38968101:39141452:-1 gene:ENSRNOG00000003769.5 transcript:ENSRNOT00000005006.5 gene_biotype:protein_coding transcript_biotype:protein_coding gene_symbol:Tmem163 description:transmembrane protein 163 [S	1	3	3	3	17.7	31.344	70460	61528	164720	98902.7	92582	137340	117600	115841	0.853782	0.657811
ENSRNOP00000005016	pre-mRNA processing factor 8	Prpf8	ENSRNOP00000005016.3;ENSRNOP00000073574.2	ENSRNOP00000005016.3 pep primary_assembly:mRatBN7.2:10:60331494:60354606:1 gene:ENSRNOG00000003495.8 transcript:ENSRNOT00000005016.6 gene_biotype:protein_coding transcript_biotype:protein_coding gene_symbol:Prpf8 description:pre-mRNA processing factor 8 [S	2	26	26	26	16.5	273.61	1516500	1550700	1451400	1506200	1517500	1550100	1376200	1.48127e+06	1.01683	0.702751
ENSRNOP00000005033	acyl-CoA thioesterase 9	Acot9	ENSRNOP00000005033.5;ENSRNOP00000091656.1;ENSRNOP00000089191.1	ENSRNOP00000005033.5 pep primary_assembly:mRatBN7.2:X:40073205:40123559:-1 gene:ENSRNOG00000003782.6 transcript:ENSRNOT00000005033.6 gene_biotype:protein_coding transcript_biotype:protein_coding gene_symbol:Acot9 description:acyl-CoA thioesterase 9 [Source	3	20	20	20	50.8	51.152	5275600	5569300	5226400	5357100	5524500	5121100	4910300	5185300	1.03313	0.458412
ENSRNOP00000093249	nucleoporin 85	Nup85	ENSRNOP00000093249.1;ENSRNOP00000080318.1;ENSRNOP00000005035.5	ENSRNOP00000093249.1 pep primary_assembly:mRatBN7.2:10:100806437:100824916:1 gene:ENSRNOG00000003673.8 transcript:ENSRNOT00000099013.1 gene_biotype:protein_coding transcript_biotype:protein_coding gene_symbol:Nup85 description:nucleoporin 85 [Source:RGD Sy	3	3	3	3	7.7	66.663	801380	967760	972820	913987	1013200	760080	785030	852770	1.07179	0.567108
ENSRNOP00000087188	golgi SNAP receptor complex me	Gosr2	ENSRNOP00000087188.1;ENSRNOP00000005046.4;ENSRNOP00000084049.1;ENSRNOP00000081754.1	ENSRNOP00000087188.1 pep primary_assembly:mRatBN7.2:10:88586299:88605625:-1 gene:ENSRNOG00000003506.6 transcript:ENSRNOT00000103024.1 gene_biotype:protein_coding transcript_biotype:protein_coding gene_symbol:Gosr2 description:golgi SNAP receptor complex me	4	2	2	2	12.7	19.462	220600	197450	206730	208260	207800	154420	208050	190090	1.09559	0.394451
ENSRNOP00000005059	WD repeat domain 26	Wdr26	ENSRNOP00000005059.6	ENSRNOP00000005059.6 pep primary_assembly:mRatBN7.2:13:92930285:92977295:-1 gene:ENSRNOG00000003723.6 transcript:ENSRNOT00000005059.6 gene_biotype:protein_coding transcript_biotype:protein_coding gene_symbol:Wdr26 description:WD repeat domain 26 [Source:RG	1	11	11	11	24.9	78.231	799150	754380	794530	782687	756980	743430	814090	771500	1.0145	0.688078
ENSRNOP00000005061			ENSRNOP00000005061.6;ENSRNOP00000078764.1;ENSRNOP00000088060.1;ENSRNOP00000082790.1;ENSRNOP00000067316.1;ENSRNOP00000049130.3;ENSRNOP00000045371.3;ENSRNOP00000022839.7;ENSRNOP00000063159.2;ENSRNOP00000089750.1;ENSRNOP00000007491.4;ENSRNOP00000074836.1;ENSRNOP00000022360.3;ENSRNOP00000096969.1;ENSRNOP00000079860.1;ENSRNOP00000078908.1;ENSRNOP00000073081.2;ENSRNOP00000091215.1;ENSRNOP00000096533.1;…	ENSRNOP00000005061.6 pep primary_assembly:mRatBN7.2:X:33821257:33986582:1 gene:ENSRNOG00000003742.9 transcript:ENSRNOT00000005061.7 gene_biotype:protein_coding transcript_biotype:protein_coding;ENSRNOP00000078764.1 pep primary_assembly:mRatBN7.2:X:33821290	26	13	13	12	20	105.21	765660	716050	625040	702250	809440	701770	712620	741277	0.947352	0.506453
ENSRNOP00000005067	neuronal pentraxin 1	Nptx1	ENSRNOP00000005067.6	ENSRNOP00000005067.6 pep primary_assembly:mRatBN7.2:10:104811403:104820367:-1 gene:ENSRNOG00000003741.7 transcript:ENSRNOT00000005067.7 gene_biotype:protein_coding transcript_biotype:protein_coding gene_symbol:Nptx1 description:neuronal pentraxin 1 [Source	1	12	12	12	28.5	47.216	5902000	6428100	5239200	5.85643e+06	6856700	5952400	6410900	6.40667e+06	0.914116	0.271573
ENSRNOP00000005102	neuroligin 3	Nlgn3	ENSRNOP00000005102.3;ENSRNOP00000005077.3;ENSRNOP00000068393.2;ENSRNOP00000080050.1	ENSRNOP00000005102.3 pep primary_assembly:mRatBN7.2:X:66429458:66451876:1 gene:ENSRNOG00000003812.8 transcript:ENSRNOT00000005102.5 gene_biotype:protein_coding transcript_biotype:protein_coding gene_symbol:Nlgn3 description:neuroligin 3 [Source:RGD Symbol;	4	15	15	13	27.7	91.585	2272600	2287500	2646900	2.40233e+06	2685000	2830700	2502300	2.67267e+06	0.898853	0.155905
ENSRNOP00000005078	zinc finger DHHC-type palmito	Zdhhc17	ENSRNOP00000005078.6	ENSRNOP00000005078.6 pep primary_assembly:mRatBN7.2:7:46369988:46433764:-1 gene:ENSRNOG00000003803.7 transcript:ENSRNOT00000005078.6 gene_biotype:protein_coding transcript_biotype:protein_coding gene_symbol:Zdhhc17 description:zinc finger DHHC-type palmito	1	4	4	4	8.7	72.54	151490	182610	172670	168923	187490	176610	170910	178337	0.947216	0.416008
ENSRNOP00000005089	mitochondrial ribosomal prote	Mrps7	ENSRNOP00000005089.5;ENSRNOP00000085231.1	ENSRNOP00000005089.5 pep primary_assembly:mRatBN7.2:10:100843679:100847129:1 gene:ENSRNOG00000003797.7 transcript:ENSRNOT00000005089.7 gene_biotype:protein_coding transcript_biotype:protein_coding gene_symbol:Mrps7 description:mitochondrial ribosomal prote	2	6	6	6	35.1	28.197	296230	268100	327150	297160	374270	385130	294810	351403	0.845638	0.177489
ENSRNOP00000005109	NmrA like redox sensor 1	Nmral1	ENSRNOP00000005109.6;ENSRNOP00000073458.1;ENSRNOP00000081541.1	ENSRNOP00000005109.6 pep primary_assembly:mRatBN7.2:10:10844962:10850192:1 gene:ENSRNOG00000003794.8 transcript:ENSRNOT00000005109.8 gene_biotype:protein_coding transcript_biotype:protein_coding gene_symbol:Nmral1 description:NmrA like redox sensor 1 [Sour	3	8	8	8	37.1	31.398	933660	842080	936880	904207	807070	803860	874430	828453	1.09144	0.121675
ENSRNOP00000094199	short coiled-coil protein	Scoc	ENSRNOP00000094199.1;ENSRNOP00000088593.1;ENSRNOP00000005124.6;ENSRNOP00000089827.1	ENSRNOP00000094199.1 pep primary_assembly:mRatBN7.2:19:24683066:24689235:1 gene:ENSRNOG00000003853.8 transcript:ENSRNOT00000115332.1 gene_biotype:protein_coding transcript_biotype:protein_coding gene_symbol:Scoc description:short coiled-coil protein [Sourc	4	1	1	1	22.2	9.2833	223340	252250	224440	233343	273830	280730	233440	262667	0.888363	0.16952
ENSRNOP00000005126	DEAH-box helicase 15	Dhx15	ENSRNOP00000005126.5;ENSRNOP00000081583.1	ENSRNOP00000005126.5 pep primary_assembly:mRatBN7.2:14:58787139:58825078:1 gene:ENSRNOG00000003844.7 transcript:ENSRNOT00000005126.7 gene_biotype:protein_coding transcript_biotype:protein_coding gene_symbol:Dhx15 description:DEAH-box helicase 15 [Source:RG	2	18	18	18	31.8	90.976	1011600	1049100	840240	966980	959650	936320	795350	897107	1.07789	0.443503
ENSRNOP00000005127	aspartyl-tRNA synthetase 1	Dars1	ENSRNOP00000005127.3;ENSRNOP00000089006.1;ENSRNOP00000093114.1	ENSRNOP00000005127.3 pep primary_assembly:mRatBN7.2:13:39857942:39913116:-1 gene:ENSRNOG00000003743.8 transcript:ENSRNOT00000005127.7 gene_biotype:protein_coding transcript_biotype:protein_coding gene_symbol:Dars1 description:aspartyl-tRNA synthetase 1 [So	3	16	16	16	42.5	57.126	2855100	2773700	2998700	2.87583e+06	2913600	3063700	2712700	2.89667e+06	0.992808	0.871761
ENSRNOP00000005138			ENSRNOP00000005138.5	ENSRNOP00000005138.5 pep primary_assembly:mRatBN7.2:X:10183068:10210918:-1 gene:ENSRNOG00000003858.7 transcript:ENSRNOT00000005138.7 gene_biotype:protein_coding transcript_biotype:protein_coding	1	3	3	3	11.2	38.725	214180	194850	96969	168666	128280	156010	28897	104396	1.61564	0.291712
ENSRNOP00000005144	solute carrier family 25 me	Slc25a11	ENSRNOP00000005144.1;ENSRNOP00000076853.1;ENSRNOP00000090022.1	ENSRNOP00000005144.1 pep primary_assembly:mRatBN7.2:10:55357602:55360410:-1 gene:ENSRNOG00000003815.5 transcript:ENSRNOT00000005144.5 gene_biotype:protein_coding transcript_biotype:protein_coding gene_symbol:Slc25a11 description:solute carrier family 25 me	3	15	15	15	55.4	34.136	15660000	16593000	18778000	1.70103e+07	18709000	18249000	17439000	1.81323e+07	0.938122	0.322852
ENSRNOP00000079025	lysophosphatidylglycerol acy	Lpgat1	ENSRNOP00000079025.1;ENSRNOP00000005153.4;ENSRNOP00000062474.3	ENSRNOP00000079025.1 pep primary_assembly:mRatBN7.2:13:103337491:103362333:1 gene:ENSRNOG00000004402.7 transcript:ENSRNOT00000094196.1 gene_biotype:protein_coding transcript_biotype:protein_coding gene_symbol:Lpgat1 description:lysophosphatidylglycerol acy	3	3	3	3	15.4	30.207	55464	141470	106500	101145	101230	132530	151500	128420	0.787608	0.399536
ENSRNOP00000005157	tryptophan hydroxylase 2	Tph2	ENSRNOP00000005157.5	ENSRNOP00000005157.5 pep primary_assembly:mRatBN7.2:7:50685694:50789424:-1 gene:ENSRNOG00000003880.5 transcript:ENSRNOT00000005157.5 gene_biotype:protein_coding transcript_biotype:protein_coding gene_symbol:Tph2 description:tryptophan hydroxylase 2 [Source	1	6	6	6	18.5	55.692	158060	191040	260910	203337	220940	329900	220820	257220	0.790517	0.318465
ENSRNOP00000005190	neudesin neurotrophic factor	Nenf	ENSRNOP00000005190.3	ENSRNOP00000005190.3 pep primary_assembly:mRatBN7.2:13:102888004:102894804:-1 gene:ENSRNOG00000003833.5 transcript:ENSRNOT00000005190.5 gene_biotype:protein_coding transcript_biotype:protein_coding gene_symbol:Nenf description:neudesin neurotrophic factor	1	3	3	3	24.6	18.991	180090	249310	326500	251967	360450	385940	277560	341317	0.73822	0.170002
ENSRNOP00000005198	solute carrier family 25	Slc25a19	ENSRNOP00000005198.4;ENSRNOP00000005292.4	ENSRNOP00000005198.4 pep primary_assembly:mRatBN7.2:10:100847168:100867447:-1 gene:ENSRNOG00000003918.6 transcript:ENSRNOT00000005198.5 gene_biotype:protein_coding transcript_biotype:protein_coding gene_symbol:Slc25a19 description:solute carrier family 25	2	3	3	3	11	41.267	200080	322060	125530	215890	255480	213970	217250	228900	0.943163	0.835756
ENSRNOP00000079694	syntaxin 8	Stx8	ENSRNOP00000079694.1;ENSRNOP00000005204.4	ENSRNOP00000079694.1 pep primary_assembly:mRatBN7.2:10:52658646:52801835:1 gene:ENSRNOG00000003849.5 transcript:ENSRNOT00000116831.1 gene_biotype:protein_coding transcript_biotype:protein_coding gene_symbol:Stx8 description:syntaxin 8 [Source:RGD Symbol;Ac	2	4	4	4	23.2	25.238	527350	466370	405820	466513	466720	425160	429580	440487	1.05909	0.525606
ENSRNOP00000005258	RAB21, member RAS oncogene fami	Rab21	ENSRNOP00000005258.4	ENSRNOP00000005258.4 pep primary_assembly:mRatBN7.2:7:50904057:50928839:-1 gene:ENSRNOG00000003923.5 transcript:ENSRNOT00000005258.5 gene_biotype:protein_coding transcript_biotype:protein_coding gene_symbol:Rab21 description:RAB21, member RAS oncogene fami	1	9	9	9	43.5	24.163	1945400	2226300	2164200	2.11197e+06	2113200	2124500	2042800	2093500	1.00882	0.845664
ENSRNOP00000077652	COMM domain containing 10	Commd10	ENSRNOP00000077652.1;ENSRNOP00000005260.5;ENSRNOP00000085768.1;ENSRNOP00000081768.1;ENSRNOP00000093520.1;ENSRNOP00000092564.1;ENSRNOP00000092254.1	ENSRNOP00000077652.1 pep primary_assembly:mRatBN7.2:18:39741298:39828831:1 gene:ENSRNOG00000003958.8 transcript:ENSRNOT00000101744.1 gene_biotype:protein_coding transcript_biotype:protein_coding gene_symbol:Commd10 description:COMM domain containing 10 [So	7	3	3	3	20.9	20.724	223820	170120	177780	190573	185170	171970	243480	200207	0.951883	0.745002
ENSRNOP00000005262	carboxypeptidase D	Cpd	ENSRNOP00000005262.3	ENSRNOP00000005262.3 pep primary_assembly:mRatBN7.2:10:61623526:61687491:-1 gene:ENSRNOG00000003873.7 transcript:ENSRNOT00000005262.6 gene_biotype:protein_coding transcript_biotype:protein_coding gene_symbol:Cpd description:carboxypeptidase D [Source:RGD S	1	3	3	3	2.8	152.63	294440	356380	353160	334660	298860	322140	326680	315893	1.05941	0.439754
ENSRNOP00000005267	OCRL, inositol polyphosphate-5-	Ocrl	ENSRNOP00000005267.7;ENSRNOP00000072408.2	ENSRNOP00000005267.7 pep primary_assembly:mRatBN7.2:X:127089590:127140362:1 gene:ENSRNOG00000003875.8 transcript:ENSRNOT00000005267.8 gene_biotype:protein_coding transcript_biotype:protein_coding gene_symbol:Ocrl description:OCRL, inositol polyphosphate-5-	2	12	12	12	16.9	102.68	876250	1082500	1082200	1013650	1135000	1120700	890170	1.04862e+06	0.966648	0.75568
ENSRNOP00000005280	torsin 1A interacting prote	Tor1aip1	ENSRNOP00000005280.4;ENSRNOP00000085745.1;ENSRNOP00000087328.1;ENSRNOP00000005296.5	ENSRNOP00000005280.4 pep primary_assembly:mRatBN7.2:13:68196681:68225862:-1 gene:ENSRNOG00000003946.9 transcript:ENSRNOT00000005280.7 gene_biotype:protein_coding transcript_biotype:protein_coding gene_symbol:Tor1aip1 description:torsin 1A interacting prote	4	7	7	7	24.2	65.648	233470	242630	244670	240257	234780	250830	175380	220330	1.09044	0.4389
ENSRNOP00000090869	tetratricopeptide repeat domain	Ttc1	ENSRNOP00000090869.1;ENSRNOP00000005304.3	ENSRNOP00000090869.1 pep primary_assembly:mRatBN7.2:10:28202328:28227457:-1 gene:ENSRNOG00000003980.6 transcript:ENSRNOT00000118530.1 gene_biotype:protein_coding transcript_biotype:protein_coding gene_symbol:Ttc1 description:tetratricopeptide repeat domain	2	5	5	5	30.3	32.318	535570	476660	550590	520940	575930	586180	540300	567470	0.918004	0.153969
ENSRNOP00000005306	cilia and flagella associat	Cfap36	ENSRNOP00000005306.4;ENSRNOP00000081264.1;ENSRNOP00000095466.1	ENSRNOP00000005306.4 pep primary_assembly:mRatBN7.2:14:102966001:102991555:-1 gene:ENSRNOG00000003901.7 transcript:ENSRNOT00000005306.6 gene_biotype:protein_coding transcript_biotype:protein_coding gene_symbol:Cfap36 description:cilia and flagella associat	3	2	2	2	11.1	39.59	150620	157660	177950	162077	188050	198000	158940	181663	0.892182	0.242608
ENSRNOP00000081061	collagen type I alpha 1 chain	Col1a1	ENSRNOP00000081061.1;ENSRNOP00000088255.1;ENSRNOP00000081946.1;ENSRNOP00000005311.5	ENSRNOP00000081061.1 pep primary_assembly:mRatBN7.2:10:79883622:79900624:1 gene:ENSRNOG00000003897.7 transcript:ENSRNOT00000115096.1 gene_biotype:protein_coding transcript_biotype:protein_coding gene_symbol:Col1a1 description:collagen type I alpha 1 chain	4	1	1	1	1.6	130.13	10245		21575	15910	10213	24831	12339	15794.3	1.00732	0.988264
ENSRNOP00000098000	regulatory associated protein	Rptor	ENSRNOP00000098000.1;ENSRNOP00000005337.5;ENSRNOP00000092487.1	ENSRNOP00000098000.1 pep primary_assembly:mRatBN7.2:10:104878487:105176983:1 gene:ENSRNOG00000003821.7 transcript:ENSRNOT00000101121.1 gene_biotype:protein_coding transcript_biotype:protein_coding gene_symbol:Rptor description:regulatory associated protein	3	13	13	13	14.6	143.77	928990	954750	953680	945807	1120500	1103700	976530	1066910	0.886492	0.0587963
ENSRNOP00000005346	prefoldin subunit 2	Pfdn2	ENSRNOP00000005346.3;ENSRNOP00000089716.1;ENSRNOP00000090419.1	ENSRNOP00000005346.3 pep primary_assembly:mRatBN7.2:13:83773381:83790504:1 gene:ENSRNOG00000066932.1 transcript:ENSRNOT00000005346.5 gene_biotype:protein_coding transcript_biotype:protein_coding gene_symbol:Pfdn2 description:prefoldin subunit 2 [Source:RGD	3	4	4	4	35.1	16.58	729640	622220	780840	710900	652760	599440	827780	693327	1.02535	0.843248
ENSRNOP00000080275	growth factor receptor bound	Grb2	ENSRNOP00000080275.1;ENSRNOP00000005347.5	ENSRNOP00000080275.1 pep primary_assembly:mRatBN7.2:10:100881962:100949309:-1 gene:ENSRNOG00000003990.7 transcript:ENSRNOT00000095127.1 gene_biotype:protein_coding transcript_biotype:protein_coding gene_symbol:Grb2 description:growth factor receptor bound	2	12	12	3	54.2	23.555	4954600	5313600	4784400	5.01753e+06	5320800	4638800	4824600	4.92807e+06	1.01815	0.744776
ENSRNOP00000005366	LLGL scribble cell polarity com	Llgl1	ENSRNOP00000005366.4	ENSRNOP00000005366.4 pep primary_assembly:mRatBN7.2:10:45379515:45394094:1 gene:ENSRNOG00000003948.6 transcript:ENSRNOT00000005366.6 gene_biotype:protein_coding transcript_biotype:protein_coding gene_symbol:Llgl1 description:LLGL scribble cell polarity com	1	19	19	19	30.4	115.84	2266300	2152400	1795300	2.07133e+06	2008700	1982100	1904900	1.96523e+06	1.05399	0.505599
ENSRNOP00000005368	phosphatidylinositol transfer	Pitpna	ENSRNOP00000005368.7;ENSRNOP00000072145.2	ENSRNOP00000005368.7 pep primary_assembly:mRatBN7.2:10:60430748:60471342:1 gene:ENSRNOG00000003846.8 transcript:ENSRNOT00000005368.8 gene_biotype:protein_coding transcript_biotype:protein_coding gene_symbol:Pitpna description:phosphatidylinositol transfer	2	17	17	15	66.1	31.907	8361000	8039600	8158000	8186200	7780700	7652200	8397500	7.94347e+06	1.03056	0.383866
ENSRNOP00000005379	charged multivesicular body p	Chmp6	ENSRNOP00000005379.5;ENSRNOP00000096043.1	ENSRNOP00000005379.5 pep primary_assembly:mRatBN7.2:10:105191950:105197640:1 gene:ENSRNOG00000004014.7 transcript:ENSRNOT00000005379.7 gene_biotype:protein_coding transcript_biotype:protein_coding gene_symbol:Chmp6 description:charged multivesicular body p	2	3	3	3	19.5	23.288	784910	745630	707080	745873	718380	674160	842930	745157	1.00096	0.99028
ENSRNOP00000005389	adenylate cyclase 3	Adcy3	ENSRNOP00000005389.4	ENSRNOP00000005389.4 pep primary_assembly:mRatBN7.2:6:27124828:27203686:1 gene:ENSRNOG00000003999.7 transcript:ENSRNOT00000005389.7 gene_biotype:protein_coding transcript_biotype:protein_coding gene_symbol:Adcy3 description:adenylate cyclase 3 [Source:RGD	1	2	2	2	2.8	128.96	40283	60017		50150	76519	212340	51455	113438	0.442092	0.401646
ENSRNOP00000005402	peptidyl-tRNA hydrolase domain	Ptrhd1	ENSRNOP00000005402.3	ENSRNOP00000005402.3 pep primary_assembly:mRatBN7.2:6:27218417:27221805:1 gene:ENSRNOG00000004059.5 transcript:ENSRNOT00000005402.5 gene_biotype:protein_coding transcript_biotype:protein_coding gene_symbol:Ptrhd1 description:peptidyl-tRNA hydrolase domain	1	4	4	4	40	16.026	153930	254170	211410	206503	238820	239820	235710	238117	0.867236	0.337917
ENSRNOP00000088533	ribosomal protein L23	Rpl23	ENSRNOP00000088533.1;ENSRNOP00000005471.6	ENSRNOP00000088533.1 pep primary_assembly:mRatBN7.2:10:82771538:82775870:-1 gene:ENSRNOG00000004107.8 transcript:ENSRNOT00000107348.1 gene_biotype:protein_coding transcript_biotype:protein_coding gene_symbol:Rpl23 description:ribosomal protein L23 [Source:	2	4	4	4	47	12.601	1910900	2055800	2003000	1989900	2638700	2757600	2061100	2485800	0.800507	0.0864913
ENSRNOP00000005479	DnaJ heat shock protein famil	Dnaja3	ENSRNOP00000005479.4;ENSRNOP00000073394.1	ENSRNOP00000005479.4 pep primary_assembly:mRatBN7.2:10:10854739:10880155:-1 gene:ENSRNOG00000003855.8 transcript:ENSRNOT00000005479.6 gene_biotype:protein_coding transcript_biotype:protein_coding gene_symbol:Dnaja3 description:DnaJ heat shock protein famil	2	11	11	2	38.2	46.776	1589900	1550100	1708200	1.61607e+06	1727600	1637100	1703500	1689400	0.956592	0.25073
ENSRNOP00000005522	LIM and SH3 protein 1	Lasp1	ENSRNOP00000005522.5;ENSRNOP00000078535.1	ENSRNOP00000005522.5 pep primary_assembly:mRatBN7.2:10:82795137:82943292:1 gene:ENSRNOG00000004132.8 transcript:ENSRNOT00000005522.8 gene_biotype:protein_coding transcript_biotype:protein_coding gene_symbol:Lasp1 description:LIM and SH3 protein 1 [Source:R	2	14	14	13	46	29.97	5033700	5339800	5662800	5.34543e+06	4636100	5285800	5807700	5243200	1.0195	0.803462
ENSRNOP00000005532	centrosomal protein 170	Cep170	ENSRNOP00000005532.6;ENSRNOP00000072465.2;ENSRNOP00000005467.6;ENSRNOP00000091063.1	ENSRNOP00000005532.6 pep primary_assembly:mRatBN7.2:13:88670358:88732224:-1 gene:ENSRNOG00000004127.8 transcript:ENSRNOT00000005532.7 gene_biotype:protein_coding transcript_biotype:protein_coding gene_symbol:Cep170 description:centrosomal protein 170 [Sour	4	31	28	27	30.2	174.99	1876000	1980600	2090600	1982400	2101400	2217400	1907700	2075500	0.955143	0.443252
ENSRNOP00000047118	ectonucleotide pyrophosphatase/	Enpp2	ENSRNOP00000047118.5;ENSRNOP00000005561.7;ENSRNOP00000076476.1;ENSRNOP00000090400.1	ENSRNOP00000047118.5 pep primary_assembly:mRatBN7.2:7:86202350:86282474:-1 gene:ENSRNOG00000004089.8 transcript:ENSRNOT00000051139.6 gene_biotype:protein_coding transcript_biotype:protein_coding gene_symbol:Enpp2 description:ectonucleotide pyrophosphatase/	4	1	1	1	1.4	96.287	8590.8	10505		9547.9		4183.2	5744.8	4964	1.92343	0.065551
ENSRNOP00000005568	trafficking protein particle	Trappc6b	ENSRNOP00000005568.4;ENSRNOP00000088355.1;ENSRNOP00000078276.1	ENSRNOP00000005568.4 pep primary_assembly:mRatBN7.2:6:76740902:76752024:-1 gene:ENSRNOG00000004103.6 transcript:ENSRNOT00000005568.6 gene_biotype:protein_coding transcript_biotype:protein_coding gene_symbol:Trappc6b description:trafficking protein particle	3	6	6	6	36.1	17.977	625040	647920	551890	608283	603670	456060	577080	545603	1.11488	0.309294
ENSRNOP00000085535	nudE neurodevelopment protein	Ndel1	ENSRNOP00000085535.1;ENSRNOP00000097143.1;ENSRNOP00000005574.6;ENSRNOP00000090924.1;ENSRNOP00000062145.2;ENSRNOP00000089660.1;ENSRNOP00000073786.2	ENSRNOP00000085535.1 pep primary_assembly:mRatBN7.2:10:53532780:53563325:-1 gene:ENSRNOG00000004139.9 transcript:ENSRNOT00000096601.1 gene_biotype:protein_coding transcript_biotype:protein_coding gene_symbol:Ndel1 description:nudE neurodevelopment protein	7	4	4	4	15.6	35.51	254350	48845	318330	207175	274840	216610	245940	245797	0.842871	0.665946
ENSRNOP00000044909	ribosomal protein S29	Rps29	ENSRNOP00000044909.2;ENSRNOP00000040703.3;ENSRNOP00000005577.5;ENSRNOP00000097962.1;ENSRNOP00000089708.1	ENSRNOP00000044909.2 pep primary_assembly:mRatBN7.2:13:85284636:85284968:1 gene:ENSRNOG00000028939.5 transcript:ENSRNOT00000041384.5 gene_biotype:protein_coding transcript_biotype:protein_coding gene_symbol:Rps29 description:ribosomal protein S29 [Source:R	5	2	2	2	32.1	6.6767	278790	324120	358850	320587	325540	383370	326050	344987	0.929273	0.462956
ENSRNOP00000057758			ENSRNOP00000057758.2;ENSRNOP00000005588.5;ENSRNOP00000045458.1;ENSRNOP00000067887.3	ENSRNOP00000057758.2 pep primary_assembly:mRatBN7.2:1:28917918:28918443:-1 gene:ENSRNOG00000069113.1 transcript:ENSRNOT00000061041.2 gene_biotype:protein_coding transcript_biotype:protein_coding;ENSRNOP00000005588.5 pep primary_assembly:mRatBN7.2:10:536104	4	5	5	4	29.7	16.511	1148000	1039100	1228300	1.13847e+06	909340	1172300	1315600	1.13241e+06	1.00535	0.965355
ENSRNOP00000005615			ENSRNOP00000005615.2	ENSRNOP00000005615.2 pep primary_assembly:mRatBN7.2:X:26976061:27013181:1 gene:ENSRNOG00000004160.4 transcript:ENSRNOT00000005615.4 gene_biotype:protein_coding transcript_biotype:protein_coding	1	6	3	3	30.8	35.098	307740	377200	346180	343707	330600	380960	273960	328507	1.04627	0.701222
ENSRNOP00000080587	syntaxin binding protein 6	Stxbp6	ENSRNOP00000080587.1;ENSRNOP00000088139.1;ENSRNOP00000005618.6;ENSRNOP00000088446.1;ENSRNOP00000078765.1	ENSRNOP00000080587.1 pep primary_assembly:mRatBN7.2:6:61920756:62157022:-1 gene:ENSRNOG00000004198.6 transcript:ENSRNOT00000111198.1 gene_biotype:protein_coding transcript_biotype:protein_coding gene_symbol:Stxbp6 description:syntaxin binding protein 6 [So	5	5	5	5	29.5	23.671	1156900	835120	711320	901113	845020	762210	966080	857770	1.05053	0.780457
ENSRNOP00000005623	solute carrier family 9 member A7	Slc9a7	ENSRNOP00000005623.7	ENSRNOP00000005623.7 pep primary_assembly:mRatBN7.2:X:2214441:2388012:1 gene:ENSRNOG00000004150.7 transcript:ENSRNOT00000005623.7 gene_biotype:protein_coding transcript_biotype:protein_coding gene_symbol:Slc9a7 description:solute carrier family 9 member A7	1	2	2	2	3.2	80.333	162730	133820	170450	155667	172450	155360	172950	166920	0.932582	0.420865
ENSRNOP00000005654	MON2 homolog, regulator of endos	Mon2	ENSRNOP00000005654.5;ENSRNOP00000039600.6	ENSRNOP00000005654.5 pep primary_assembly:mRatBN7.2:7:58651075:58727744:-1 gene:ENSRNOG00000004185.9 transcript:ENSRNOT00000005654.7 gene_biotype:protein_coding transcript_biotype:protein_coding gene_symbol:Mon2 description:MON2 homolog, regulator of endos	2	16	16	16	12.2	189.16	642560	610300	591820	614893	738300	656540	634990	676610	0.908785	0.150686
ENSRNOP00000093091	vacuole membrane protein 1	Vmp1	ENSRNOP00000093091.1;ENSRNOP00000005658.2;ENSRNOP00000093672.1	ENSRNOP00000093091.1 pep primary_assembly:mRatBN7.2:10:71405912:71504975:-1 gene:ENSRNOG00000003967.4 transcript:ENSRNOT00000109003.1 gene_biotype:protein_coding transcript_biotype:protein_coding gene_symbol:Vmp1 description:vacuole membrane protein 1 [Sou	3	2	2	2	6.6	39.769	206810	154240	108170	156407	108490	137350	70098	105313	1.48516	0.21291
ENSRNOP00000005661	peptidyl-tRNA hydrolase 2	Ptrh2	ENSRNOP00000005661.2;ENSRNOP00000084315.1	ENSRNOP00000005661.2 pep primary_assembly:mRatBN7.2:10:71504956:71515398:1 gene:ENSRNOG00000004288.6 transcript:ENSRNOT00000005661.6 gene_biotype:protein_coding transcript_biotype:protein_coding gene_symbol:Ptrh2 description:peptidyl-tRNA hydrolase 2 [Sour	2	4	4	4	36.5	19.529	194810	260100	313710	256207	265300	319850	243240	276130	0.927848	0.654231
ENSRNOP00000059943	ATP-binding cassette, subfami	Abca8a	ENSRNOP00000059943.4;ENSRNOP00000005665.6;ENSRNOP00000079160.1;ENSRNOP00000087594.1;ENSRNOP00000005489.8	ENSRNOP00000059943.4 pep primary_assembly:mRatBN7.2:10:95002334:95072375:-1 gene:ENSRNOG00000004147.8 transcript:ENSRNOT00000065947.5 gene_biotype:protein_coding transcript_biotype:protein_coding gene_symbol:Abca8a description:ATP-binding cassette, subfami	5	22	22	21	22.9	181.18	1988100	3020800	999200	2002700	1096200	1144500	1414000	1.21823e+06	1.64394	0.255723
ENSRNOP00000090458	transmembrane protein 94	Tmem94	ENSRNOP00000090458.1;ENSRNOP00000005684.5	ENSRNOP00000090458.1 pep primary_assembly:mRatBN7.2:10:101005999:101027394:1 gene:ENSRNOG00000004032.8 transcript:ENSRNOT00000103363.1 gene_biotype:protein_coding transcript_biotype:protein_coding gene_symbol:Tmem94 description:transmembrane protein 94 [So	2	5	5	5	4.7	150.2	86766	75434	148080	103427	159800	102840	73861	112167	0.922077	0.809034
ENSRNOP00000091928	BAR/IMD domain containing ad	Baiap2	ENSRNOP00000091928.1;ENSRNOP00000084785.1;ENSRNOP00000060172.3;ENSRNOP00000005687.6;ENSRNOP00000090748.1	ENSRNOP00000091928.1 pep primary_assembly:mRatBN7.2:10:105223090:105284718:1 gene:ENSRNOG00000004049.8 transcript:ENSRNOT00000104586.1 gene_biotype:protein_coding transcript_biotype:protein_coding gene_symbol:Baiap2 description:BAR/IMD domain containing ad	5	25	25	25	60	56.808	13264000	13227000	11036000	12509000	14008000	12622000	13427000	1.33523e+07	0.93684	0.37172
ENSRNOP00000005690	potassium voltage-gated channel	Kcnc2	ENSRNOP00000005690.2;ENSRNOP00000088724.1;ENSRNOP00000084708.1;ENSRNOP00000005773.4	ENSRNOP00000005690.2 pep primary_assembly:mRatBN7.2:7:47701378:47883968:1 gene:ENSRNOG00000004077.9 transcript:ENSRNOT00000005690.5 gene_biotype:protein_coding transcript_biotype:protein_coding gene_symbol:Kcnc2 description:potassium voltage-gated channel	4	4	3	3	10.1	67.55	59014	66963	91861	72612.7	64402	87617	75224	75747.7	0.958613	0.806058
ENSRNOP00000089717	microsomal glutathione S-trans	Mgst3	ENSRNOP00000089717.1;ENSRNOP00000005719.4;ENSRNOP00000096456.1	ENSRNOP00000089717.1 pep primary_assembly:mRatBN7.2:13:79526541:79532869:-1 gene:ENSRNOG00000004245.8 transcript:ENSRNOT00000097875.1 gene_biotype:protein_coding transcript_biotype:protein_coding gene_symbol:Mgst3 description:microsomal glutathione S-trans	3	4	4	4	28.7	19.975	6713100	8048200	8818000	7.85977e+06	9746100	10332000	7685700	9254600	0.849282	0.239787
ENSRNOP00000005729	6-phosphofructo-2-kinase/fruc	Pfkfb2	ENSRNOP00000005729.3;ENSRNOP00000044027.4;ENSRNOP00000082431.1;ENSRNOP00000093709.1;ENSRNOP00000030819.4;ENSRNOP00000044506.2;ENSRNOP00000060044.3;ENSRNOP00000074158.2;ENSRNOP00000028039.2;ENSRNOP00000000178.6;ENSRNOP00000035212.1;ENSRNOP00000096463.1;ENSRNOP00000025731.5;ENSRNOP00000097078.1;ENSRNOP00000071567.1;ENSRNOP00000093099.1;ENSRNOP00000025700.4;ENSRNOP00000040928.4;ENSRNOP00000062965.1	ENSRNOP00000005729.3 pep primary_assembly:mRatBN7.2:13:42147478:42174699:-1 gene:ENSRNOG00000004162.9 transcript:ENSRNOT00000005729.6 gene_biotype:protein_coding transcript_biotype:protein_coding gene_symbol:Pfkfb2 description:6-phosphofructo-2-kinase/fruc	19	10	10	10	27.1	64.155	898270	848220	693540	813343	815930	901110	724680	813907	0.999308	0.994715
ENSRNOP00000087840	solute carrier family 25 m	Slc25a29	ENSRNOP00000087840.1;ENSRNOP00000005753.5	ENSRNOP00000087840.1 pep primary_assembly:mRatBN7.2:6:127742033:127744091:-1 gene:ENSRNOG00000004351.6 transcript:ENSRNOT00000094029.1 gene_biotype:protein_coding transcript_biotype:protein_coding gene_symbol:Slc25a29 description:solute carrier family 25 m	2	1	1	1	4.1	31.67	24069	19312	28470	23950.3	19409	17611	24295	20438.3	1.17183	0.348969
ENSRNOP00000005762	cyclin-dependent kinase 17	Cdk17	ENSRNOP00000005762.4;ENSRNOP00000085940.1;ENSRNOP00000077965.1;ENSRNOP00000032191.3;ENSRNOP00000018431.8;ENSRNOP00000008256.3;ENSRNOP00000073564.2;ENSRNOP00000087177.1;ENSRNOP00000092388.1;ENSRNOP00000072365.1;ENSRNOP00000065356.3;ENSRNOP00000087160.1;ENSRNOP00000094402.1;ENSRNOP00000012597.5;ENSRNOP00000092678.1;ENSRNOP00000087481.1;ENSRNOP00000034754.4;ENSRNOP00000091047.1	ENSRNOP00000005762.4 pep primary_assembly:mRatBN7.2:7:27683890:27762002:1 gene:ENSRNOG00000004148.6 transcript:ENSRNOT00000005762.5 gene_biotype:protein_coding transcript_biotype:protein_coding gene_symbol:Cdk17 description:cyclin-dependent kinase 17 [Sour	18	9	8	5	21.4	59.482	437930	392550	501780	444087	326410	418460	421300	388723	1.14242	0.280849
ENSRNOP00000005770	protein kinase N1	Pkn1	ENSRNOP00000005770.4;ENSRNOP00000086181.1;ENSRNOP00000082261.1	ENSRNOP00000005770.4 pep primary_assembly:mRatBN7.2:19:24442130:24470107:1 gene:ENSRNOG00000004131.7 transcript:ENSRNOT00000005770.5 gene_biotype:protein_coding transcript_biotype:protein_coding gene_symbol:Pkn1 description:protein kinase N1 [Source:RGD Sy	3	5	5	5	7.5	104.47	305310	261450	270670	279143	270620	315940	243460	276673	1.00893	0.926062
ENSRNOP00000005781	glutaredoxin 5	Glrx5	ENSRNOP00000005781.5	ENSRNOP00000005781.5 pep primary_assembly:mRatBN7.2:6:123988134:123998545:1 gene:ENSRNOG00000004206.6 transcript:ENSRNOT00000005781.6 gene_biotype:protein_coding transcript_biotype:protein_coding gene_symbol:Glrx5 description:glutaredoxin 5 [Source:RGD Sym	1	4	4	4	24.8	22.995	1345200	1285500	1812800	1.48117e+06	1779600	1479400	1905400	1.72147e+06	0.86041	0.314691
ENSRNOP00000005786	eukaryotic translation initiati	Eif3h	ENSRNOP00000005786.4;ENSRNOP00000058501.4	ENSRNOP00000005786.4 pep primary_assembly:mRatBN7.2:7:83091039:83152147:-1 gene:ENSRNOG00000004252.7 transcript:ENSRNOT00000005786.7 gene_biotype:protein_coding transcript_biotype:protein_coding gene_symbol:Eif3h description:eukaryotic translation initiati	2	8	8	2	37.5	37.664	791570	874010	811090	825557	820250	908200	751710	826720	0.998593	0.983116
ENSRNOP00000005798	protein phosphatase, Mg2+/Mn2+ d	Ppm1h	ENSRNOP00000005798.4;ENSRNOP00000084629.1;ENSRNOP00000061506.3;ENSRNOP00000065490.3;ENSRNOP00000077824.1	ENSRNOP00000005798.4 pep primary_assembly:mRatBN7.2:7:58338661:58599547:1 gene:ENSRNOG00000004314.8 transcript:ENSRNOT00000005798.8 gene_biotype:protein_coding transcript_biotype:protein_coding gene_symbol:Ppm1h description:protein phosphatase, Mg2+/Mn2+ d	5	18	18	18	54.4	56.379	2245900	2336900	2569600	2.38413e+06	2702900	3076500	2382500	2.72063e+06	0.876316	0.204978
ENSRNOP00000005815	mitochondrial ribosomal protei	Mrpl13	ENSRNOP00000005815.3	ENSRNOP00000005815.3 pep primary_assembly:mRatBN7.2:7:86951541:86973577:-1 gene:ENSRNOG00000004401.7 transcript:ENSRNOT00000005815.7 gene_biotype:protein_coding transcript_biotype:protein_coding gene_symbol:Mrpl13 description:mitochondrial ribosomal protei	1	1	1	1	8.4	20.54	48974	51732	10117	36941	50709	47220		48964.5	0.754445	0.539099
ENSRNOP00000078141	mitochondrial translational i	Mtif2	ENSRNOP00000078141.1;ENSRNOP00000005834.6	ENSRNOP00000078141.1 pep primary_assembly:mRatBN7.2:14:103270039:103285728:1 gene:ENSRNOG00000004161.8 transcript:ENSRNOT00000094337.1 gene_biotype:protein_coding transcript_biotype:protein_coding gene_symbol:Mtif2 description:mitochondrial translational i	2	2	2	2	4.7	73.691	28768	43257	38459	36828	64714	70768	25218	53566.7	0.687517	0.324241
ENSRNOP00000005837	PHD finger protein 5A	Phf5a	ENSRNOP00000005837.3;ENSRNOP00000095542.1	ENSRNOP00000005837.3 pep primary_assembly:mRatBN7.2:7:113378471:113385035:-1 gene:ENSRNOG00000024170.6 transcript:ENSRNOT00000005837.5 gene_biotype:protein_coding transcript_biotype:protein_coding gene_symbol:Phf5a description:PHD finger protein 5A [Source	2	2	2	2	20.6	12.034	82686	84146	104080	90304	91018	79553	86343	85638	1.05449	0.57541
ENSRNOP00000094763	guanine nucleotide exchange factor MSS4-like		ENSRNOP00000094763.1;ENSRNOP00000005845.3	ENSRNOP00000094763.1 pep primary_assembly:mRatBN7.2:2:153446388:153446759:1 gene:ENSRNOG00000063309.1 transcript:ENSRNOT00000094786.1 gene_biotype:protein_coding transcript_biotype:protein_coding description:guanine nucleotide exchange factor MSS4-like [So	2	3	3	3	28.5	13.941	204420	165990	164190	178200	151780	188050	102780	147537	1.20784	0.334587
ENSRNOP00000078776	zinc finger and BTB domain con	Zbtb18	ENSRNOP00000078776.1;ENSRNOP00000005849.6;ENSRNOP00000086781.1;ENSRNOP00000082972.1;ENSRNOP00000077961.1	ENSRNOP00000078776.1 pep primary_assembly:mRatBN7.2:13:89440186:89445877:1 gene:ENSRNOG00000004423.7 transcript:ENSRNOT00000094045.1 gene_biotype:protein_coding transcript_biotype:protein_coding gene_symbol:Zbtb18 description:zinc finger and BTB domain con	5	6	6	6	17.9	58.184	509930	535640	88461	378010	326230	168100	370570	288300	1.31117	0.599309
ENSRNOP00000082788	dopa decarboxylase	Ddc	ENSRNOP00000082788.1;ENSRNOP00000005851.4;ENSRNOP00000064520.2;ENSRNOP00000085523.1;ENSRNOP00000053885.4	ENSRNOP00000082788.1 pep primary_assembly:mRatBN7.2:14:86378685:86452371:-1 gene:ENSRNOG00000004327.9 transcript:ENSRNOT00000103628.1 gene_biotype:protein_coding transcript_biotype:protein_coding gene_symbol:Ddc description:dopa decarboxylase [Source:RGD S	5	8	8	8	26.2	55.442	441610	198160	404500	348090	221350	499450	339450	353417	0.984928	0.96389
ENSRNOP00000077529	BRISC and BRCA1 A complex memb	Babam2	ENSRNOP00000077529.1;ENSRNOP00000005855.4;ENSRNOP00000088211.1;ENSRNOP00000077931.1	ENSRNOP00000077529.1 pep primary_assembly:mRatBN7.2:6:24439083:24833951:-1 gene:ENSRNOG00000004364.5 transcript:ENSRNOT00000101187.1 gene_biotype:protein_coding transcript_biotype:protein_coding gene_symbol:Babam2 description:BRISC and BRCA1 A complex memb	4	5	5	5	16.4	39.768	240250	214010	204000	219420	213140	202200	212610	209317	1.04827	0.424807
ENSRNOP00000085209	kinase D-interacting substra	Kidins220	ENSRNOP00000085209.1;ENSRNOP00000005858.7;ENSRNOP00000092341.1;ENSRNOP00000063889.3;ENSRNOP00000091847.1;ENSRNOP00000082934.1;ENSRNOP00000093485.1	ENSRNOP00000085209.1 pep primary_assembly:mRatBN7.2:6:41618294:41703256:1 gene:ENSRNOG00000023176.8 transcript:ENSRNOT00000098052.1 gene_biotype:protein_coding transcript_biotype:protein_coding gene_symbol:Kidins220 description:kinase D-interacting substra	7	11	11	11	9.5	185.42	320490	263920	233050	272487	251910	293690	210580	252060	1.08104	0.591688
ENSRNOP00000005866	cerebellin 4 precursor	Cbln4	ENSRNOP00000005866.3	ENSRNOP00000005866.3 pep primary_assembly:mRatBN7.2:3:160799587:160807143:-1 gene:ENSRNOG00000004372.5 transcript:ENSRNOT00000005866.5 gene_biotype:protein_coding transcript_biotype:protein_coding gene_symbol:Cbln4 description:cerebellin 4 precursor [Sourc	1	2	2	2	15.2	21.595	107380	136270	156480	133377	136290	134620	112160	127690	1.04453	0.743777
ENSRNOP00000048664	ribosomal protein S27a,	Rps27a-ps1	ENSRNOP00000048664.1;ENSRNOP00000005872.1;ENSRNOP00000090473.1;ENSRNOP00000086760.1;ENSRNOP00000027073.3;ENSRNOP00000079541.1;ENSRNOP00000086005.1;ENSRNOP00000080954.1;ENSRNOP00000078230.1;ENSRNOP00000074688.2;ENSRNOP00000083148.1;ENSRNOP00000027780.7;ENSRNOP00000080550.1;ENSRNOP00000047281.5	ENSRNOP00000048664.1 pep primary_assembly:mRatBN7.2:5:133180212:133180805:-1 gene:ENSRNOG00000034246.3 transcript:ENSRNOT00000049535.3 gene_biotype:protein_coding transcript_biotype:protein_coding gene_symbol:Rps27a-ps1 description:ribosomal protein S27a,	14	12	12	7	55.8	17.951	60646000	52073000	38081000	5.02667e+07	51840000	43072000	56497000	5.04697e+07	0.995978	0.980137
ENSRNOP00000005881	stonin 2	Ston2	ENSRNOP00000005881.4	ENSRNOP00000005881.4 pep primary_assembly:mRatBN7.2:6:110567485:110676376:-1 gene:ENSRNOG00000004458.5 transcript:ENSRNOT00000005881.5 gene_biotype:protein_coding transcript_biotype:protein_coding gene_symbol:Ston2 description:stonin 2 [Source:RGD Symbol;A	1	5	5	5	8.9	99.49	262450	348910	316300	309220	348730	332450	344830	342003	0.904143	0.270848
ENSRNOP00000082039	D-glutamate cyclase	Dglucy	ENSRNOP00000082039.1;ENSRNOP00000005903.6	ENSRNOP00000082039.1 pep primary_assembly:mRatBN7.2:6:120055460:120130910:1 gene:ENSRNOG00000004442.8 transcript:ENSRNOT00000117375.1 gene_biotype:protein_coding transcript_biotype:protein_coding gene_symbol:Dglucy description:D-glutamate cyclase [Source:R	2	5	5	5	14	64.83	346070	448340	380850	391753	604710	438570	296370	446550	0.877289	0.591296
ENSRNOP00000005925	COMM domain containing 5	Commd5	ENSRNOP00000005925.2	ENSRNOP00000005925.2 pep primary_assembly:mRatBN7.2:7:108598673:108624764:1 gene:ENSRNOG00000004484.4 transcript:ENSRNOT00000005925.4 gene_biotype:protein_coding transcript_biotype:protein_coding gene_symbol:Commd5 description:COMM domain containing 5 [Sou	1	3	3	3	25	24.525	167170	154810	96847	139609	195590	139630	133850	156357	0.892888	0.597976
ENSRNOP00000005930	leukotriene A4 hydrolase	Lta4h	ENSRNOP00000005930.4	ENSRNOP00000005930.4 pep primary_assembly:mRatBN7.2:7:27969789:28001600:1 gene:ENSRNOG00000004494.6 transcript:ENSRNOT00000005930.5 gene_biotype:protein_coding transcript_biotype:protein_coding gene_symbol:Lta4h description:leukotriene A4 hydrolase [Source	1	20	20	20	44.7	69.088	3370800	3360600	3586900	3.43943e+06	3270400	3483600	3244400	3332800	1.032	0.370401
ENSRNOP00000005942	cask-interacting protein 2	Caskin2	ENSRNOP00000005942.4	ENSRNOP00000005942.4 pep primary_assembly:mRatBN7.2:10:101027260:101041414:-1 gene:ENSRNOG00000004310.7 transcript:ENSRNOT00000005942.6 gene_biotype:protein_coding transcript_biotype:protein_coding gene_symbol:Caskin2 description:cask-interacting protein 2	1	4	2	2	5.5	126.98	34625	40079	67036	47246.7	29674	43302	59160	44045.3	1.07268	0.81966
ENSRNOP00000005961	adenylosuccinate synthase	Adss	ENSRNOP00000005961.5;ENSRNOP00000097735.1;ENSRNOP00000084186.1;ENSRNOP00000082624.1	ENSRNOP00000005961.5 pep primary_assembly:mRatBN7.2:13:89769244:89799604:-1 gene:ENSRNOG00000004481.6 transcript:ENSRNOT00000005961.6 gene_biotype:protein_coding transcript_biotype:protein_coding gene_symbol:Adss description:adenylosuccinate synthase [Sour	4	12	12	12	36.4	50.085	2414400	2515600	2266800	2.39893e+06	2583700	2429600	2261000	2.42477e+06	0.989346	0.837298
ENSRNOP00000005997			ENSRNOP00000005997.6;ENSRNOP00000095644.1	ENSRNOP00000005997.6 pep primary_assembly:mRatBN7.2:X:77377781:77443900:1 gene:ENSRNOG00000004512.8 transcript:ENSRNOT00000005997.8 gene_biotype:protein_coding transcript_biotype:protein_coding;ENSRNOP00000095644.1 pep primary_assembly:mRatBN7.2:X:77377820	2	7	7	7	34	29.545	1026700	1126600	1019100	1.05747e+06	1259700	1107500	938890	1102030	0.959563	0.675668
ENSRNOP00000006020	retinol dehydrogenase 14	Rdh14	ENSRNOP00000006020.4	ENSRNOP00000006020.4 pep primary_assembly:mRatBN7.2:6:33156569:33161712:1 gene:ENSRNOG00000039551.4 transcript:ENSRNOT00000006020.7 gene_biotype:protein_coding transcript_biotype:protein_coding gene_symbol:Rdh14 description:retinol dehydrogenase 14 [Source	1	8	8	8	36.2	36.195	1161100	1111100	958890	1077030	1162100	1147100	1010100	1.10643e+06	0.973425	0.724325
ENSRNOP00000006063	ubiquitin-like domain contain	Ublcp1	ENSRNOP00000006063.7	ENSRNOP00000006063.7 pep primary_assembly:mRatBN7.2:10:28945698:28960996:-1 gene:ENSRNOG00000004477.8 transcript:ENSRNOT00000006063.8 gene_biotype:protein_coding transcript_biotype:protein_coding gene_symbol:Ublcp1 description:ubiquitin-like domain contain	1	3	3	3	8.8	36.866	53498	67578	50637	57237.7	62771	77550	37259	59193.3	0.966961	0.886665
ENSRNOP00000078445	epidermal growth factor receptor	Egfr	ENSRNOP00000078445.1;ENSRNOP00000080460.1;ENSRNOP00000006087.3	ENSRNOP00000078445.1 pep primary_assembly:mRatBN7.2:14:91286480:91302348:1 gene:ENSRNOG00000004332.5 transcript:ENSRNOT00000111139.1 gene_biotype:protein_coding transcript_biotype:protein_coding gene_symbol:Egfr description:epidermal growth factor receptor	3	2	2	2	5.3	55.672	35939	58369	38853	44387	53184	53060	42164	49469.3	0.897263	0.556583
ENSRNOP00000078116	anaphase promoting complex su	Anapc4	ENSRNOP00000078116.1;ENSRNOP00000006093.3	ENSRNOP00000078116.1 pep primary_assembly:mRatBN7.2:14:58125995:58157770:-1 gene:ENSRNOG00000004130.5 transcript:ENSRNOT00000118640.1 gene_biotype:protein_coding transcript_biotype:protein_coding gene_symbol:Anapc4 description:anaphase promoting complex su	2	3	3	3	6.5	89.798	77049	76314	81922	78428.3	76842	69976	63905	70241	1.11656	0.118509
ENSRNOP00000085572	calcium voltage-gated channel	Cacnb1	ENSRNOP00000085572.1;ENSRNOP00000078981.1;ENSRNOP00000006098.4;ENSRNOP00000073177.1;ENSRNOP00000091590.1	ENSRNOP00000085572.1 pep primary_assembly:mRatBN7.2:10:82998182:83018694:-1 gene:ENSRNOG00000004518.8 transcript:ENSRNOT00000109621.1 gene_biotype:protein_coding transcript_biotype:protein_coding gene_symbol:Cacnb1 description:calcium voltage-gated channel	5	15	15	12	43.2	62.519	1719700	1617900	1417000	1.58487e+06	1612100	1185200	1656800	1484700	1.06747	0.596977
ENSRNOP00000006128	tryptophanyl-tRNA synthetase	Wars1	ENSRNOP00000006128.3;ENSRNOP00000049063.3;ENSRNOP00000073702.1	ENSRNOP00000006128.3 pep primary_assembly:mRatBN7.2:6:127776090:127806636:-1 gene:ENSRNOG00000004359.8 transcript:ENSRNOT00000006128.6 gene_biotype:protein_coding transcript_biotype:protein_coding gene_symbol:Wars1 description:tryptophanyl-tRNA synthetase	3	14	14	14	37.8	54.143	4617900	4450600	3918300	4.32893e+06	4394100	4266100	4477700	4379300	0.988499	0.829927
ENSRNOP00000079513	autophagy related 2B	Atg2b	ENSRNOP00000079513.1;ENSRNOP00000006131.6	ENSRNOP00000079513.1 pep primary_assembly:mRatBN7.2:6:124525523:124576151:-1 gene:ENSRNOG00000004519.7 transcript:ENSRNOT00000108549.1 gene_biotype:protein_coding transcript_biotype:protein_coding gene_symbol:Atg2b description:autophagy related 2B [Source:	2	14	14	13	9.8	218.3	648010	617750	440390	568717	557190	670140	571000	599443	0.948741	0.698838
ENSRNOP00000006143	SEL1L adaptor subunit of ERAD	Sel1l	ENSRNOP00000006143.6;ENSRNOP00000091209.1;ENSRNOP00000085181.1;ENSRNOP00000043232.3	ENSRNOP00000006143.6 pep primary_assembly:mRatBN7.2:6:110735450:110779648:-1 gene:ENSRNOG00000004464.8 transcript:ENSRNOT00000006143.7 gene_biotype:protein_coding transcript_biotype:protein_coding gene_symbol:Sel1l description:SEL1L adaptor subunit of ERAD	4	9	9	9	21.3	82.012	349340	287650	415830	350940	479940	468080	289280	412433	0.850901	0.440757
ENSRNOP00000006160	mitochondrial fission process	Mtfp1	ENSRNOP00000006160.3	ENSRNOP00000006160.3 pep primary_assembly:mRatBN7.2:14:78968442:78972274:-1 gene:ENSRNOG00000004640.7 transcript:ENSRNOT00000006160.7 gene_biotype:protein_coding transcript_biotype:protein_coding gene_symbol:Mtfp1 description:mitochondrial fission process	1	3	3	3	21.1	18.366	172010	192510	474590	279703	224160	387980	253480	288540	0.969375	0.939766
ENSRNOP00000006180	SLIT-ROBO Rho GTPase activatin	Srgap1	ENSRNOP00000006180.6;ENSRNOP00000076872.1;ENSRNOP00000094388.1	ENSRNOP00000006180.6 pep primary_assembly:mRatBN7.2:7:57329532:57596196:-1 gene:ENSRNOG00000004603.7 transcript:ENSRNOT00000006180.7 gene_biotype:protein_coding transcript_biotype:protein_coding gene_symbol:Srgap1 description:SLIT-ROBO Rho GTPase activatin	3	10	5	5	11.7	124.04	194620	185600	151070	177097	177060	227040	211750	205283	0.862694	0.228988
ENSRNOP00000006190	protein phosphatase 1 catalyti	Ppp1cb	ENSRNOP00000006190.3;ENSRNOP00000091459.1;ENSRNOP00000076771.1;ENSRNOP00000046148.6;ENSRNOP00000086316.1	ENSRNOP00000006190.3 pep primary_assembly:mRatBN7.2:6:23960999:23992824:-1 gene:ENSRNOG00000004612.5 transcript:ENSRNOT00000006190.5 gene_biotype:protein_coding transcript_biotype:protein_coding gene_symbol:Ppp1cb description:protein phosphatase 1 catalyti	5	20	7	7	67.3	37.186	2923000	2680600	2931600	2.84507e+06	2831200	2446100	3105000	2794100	1.01824	0.818546
ENSRNOP00000006217	mitogen-activated protein kina	Map2k6	ENSRNOP00000006217.3;ENSRNOP00000008679.6;ENSRNOP00000065373.2	ENSRNOP00000006217.3 pep primary_assembly:mRatBN7.2:10:95373204:95488293:1 gene:ENSRNOG00000004437.8 transcript:ENSRNOT00000006217.7 gene_biotype:protein_coding transcript_biotype:protein_coding gene_symbol:Map2k6 description:mitogen-activated protein kina	3	10	10	10	44	37.444	1189000	1158300	1212900	1.18673e+06	1119400	1084800	1410900	1.20503e+06	0.984814	0.869637
ENSRNOP00000006219	contactin 1	Cntn1	ENSRNOP00000006219.3;ENSRNOP00000071355.2	ENSRNOP00000006219.3 pep primary_assembly:mRatBN7.2:7:123372792:123558541:1 gene:ENSRNOG00000004438.5 transcript:ENSRNOT00000006219.5 gene_biotype:protein_coding transcript_biotype:protein_coding gene_symbol:Cntn1 description:contactin 1 [Source:RGD Symbol	2	47	47	47	62.7	113.49	69439000	71108000	68646000	69731000	71371000	69791000	70049000	7.04037e+07	0.990446	0.484988
ENSRNOP00000006306	Cd48 molecule	Cd48	ENSRNOP00000006306.5;ENSRNOP00000079741.1	ENSRNOP00000006306.5 pep primary_assembly:mRatBN7.2:13:84185559:84209142:1 gene:ENSRNOG00000004737.8 transcript:ENSRNOT00000006306.8 gene_biotype:protein_coding transcript_biotype:protein_coding gene_symbol:Cd48 description:Cd48 molecule [Source:RGD Symbol	2	2	2	2	16.1	25.381	106330	48212	67639	74060.3		49616	68957	59286.5	1.24919	0.569526
ENSRNOP00000078930	presequence translocase associa	Pam16	ENSRNOP00000078930.1;ENSRNOP00000006314.4;ENSRNOP00000095881.1	ENSRNOP00000078930.1 pep primary_assembly:mRatBN7.2:10:10949131:10950649:1 gene:ENSRNOG00000004608.6 transcript:ENSRNOT00000106238.1 gene_biotype:protein_coding transcript_biotype:protein_coding gene_symbol:Pam16 description:presequence translocase associa	3	3	3	3	39.5	13.097	485660	428660	551260	488527	492130	611340	589160	564210	0.86586	0.211508
ENSRNOP00000006340	solute carrier family 30 me	Slc30a1	ENSRNOP00000006340.2	ENSRNOP00000006340.2 pep primary_assembly:mRatBN7.2:13:103491037:103494910:1 gene:ENSRNOG00000004749.5 transcript:ENSRNOT00000006340.5 gene_biotype:protein_coding transcript_biotype:protein_coding gene_symbol:Slc30a1 description:solute carrier family 30 me	1	5	5	5	17.8	55.142	354930	361080	425730	380580	442230	439220	377710	419720	0.906747	0.273996
ENSRNOP00000071329	kinesin family member 5C	Kif5c	ENSRNOP00000071329.2;ENSRNOP00000006341.8	ENSRNOP00000071329.2 pep primary_assembly:mRatBN7.2:3:34032105:34182413:1 gene:ENSRNOG00000004680.8 transcript:ENSRNOT00000081744.2 gene_biotype:protein_coding transcript_biotype:protein_coding gene_symbol:Kif5c description:kinesin family member 5C [Source	2	41	41	29	56.6	108.29	9562500	9666900	10012000	9.74713e+06	9517800	10137000	9423000	9692600	1.00563	0.845203
ENSRNOP00000006355	ADP-ribosylation factor 6	Arf6	ENSRNOP00000006355.5;ENSRNOP00000080368.1;ENSRNOP00000079011.1;ENSRNOP00000077772.1	ENSRNOP00000006355.5 pep primary_assembly:mRatBN7.2:6:87840142:87874114:1 gene:ENSRNOG00000070951.1 transcript:ENSRNOT00000006355.6 gene_biotype:protein_coding transcript_biotype:protein_coding gene_symbol:Arf6 description:ADP-ribosylation factor 6 [Source	4	6	6	6	49.4	18.172	2622100	2670500	2608100	2.63357e+06	2719300	2657800	2591100	2.65607e+06	0.991529	0.617032
ENSRNOP00000006356	SEC24 homolog A, COPII coat c	Sec24a	ENSRNOP00000006356.5;ENSRNOP00000069364.2	ENSRNOP00000006356.5 pep primary_assembly:mRatBN7.2:10:35949085:36024353:-1 gene:ENSRNOG00000004563.8 transcript:ENSRNOT00000006356.6 gene_biotype:protein_coding transcript_biotype:protein_coding gene_symbol:Sec24a description:SEC24 homolog A, COPII coat c	2	7	6	6	7.9	118.87	158250	214620	145390	172753	212940	227480	160230	200217	0.862832	0.404349
ENSRNOP00000006359	ribosomal protein L19	Rpl19	ENSRNOP00000006359.4;ENSRNOP00000080853.1;ENSRNOP00000007683.5	ENSRNOP00000006359.4 pep primary_assembly:mRatBN7.2:10:83022741:83052112:1 gene:ENSRNOG00000004741.6 transcript:ENSRNOT00000006359.6 gene_biotype:protein_coding transcript_biotype:protein_coding gene_symbol:Rpl19 description:ribosomal protein L19 [Source:R	3	3	3	3	13.3	23.466	914730	1229800	1073600	1072710	1154500	1094800	981930	1.07708e+06	0.995946	0.968546
ENSRNOP00000095949	N-ethylmaleimide sensitive facto	Nsf	ENSRNOP00000095949.1;ENSRNOP00000073942.2;ENSRNOP00000006361.6	ENSRNOP00000095949.1 pep primary_assembly:mRatBN7.2:10:88727912:88835912:-1 gene:ENSRNOG00000003905.7 transcript:ENSRNOT00000099576.1 gene_biotype:protein_coding transcript_biotype:protein_coding gene_symbol:Nsf description:N-ethylmaleimide sensitive facto	3	59	59	59	76.5	82.643	148640000	137800000	128820000	138420000	143430000	141490000	142580000	142500000	0.971368	0.517653
ENSRNOP00000070310	F-box protein 7	Fbxo7	ENSRNOP00000070310.1;ENSRNOP00000006366.5	ENSRNOP00000070310.1 pep primary_assembly:mRatBN7.2:7:17809422:17837528:-1 gene:ENSRNOG00000004637.8 transcript:ENSRNOT00000077577.2 gene_biotype:protein_coding transcript_biotype:protein_coding gene_symbol:Fbxo7 description:F-box protein 7 [Source:RGD Sym	2	4	4	4	16.2	47.144	495490	448660	447540	463897	363450	395950	432900	397433	1.16723	0.0598814
ENSRNOP00000071102	Sec23 homolog A, COPII coat co	Sec23a	ENSRNOP00000071102.2;ENSRNOP00000006369.4;ENSRNOP00000078888.1;ENSRNOP00000078374.1;ENSRNOP00000062590.2	ENSRNOP00000071102.2 pep primary_assembly:mRatBN7.2:6:76658427:76706035:-1 gene:ENSRNOG00000004657.7 transcript:ENSRNOT00000084611.2 gene_biotype:protein_coding transcript_biotype:protein_coding gene_symbol:Sec23a description:Sec23 homolog A, COPII coat co	5	19	19	19	37.5	82.955	2688500	2954900	2846300	2829900	3025900	3030500	2797000	2.95113e+06	0.95892	0.329115
ENSRNOP00000006373	reticulon 1	Rtn1	ENSRNOP00000006373.3	ENSRNOP00000006373.3 pep primary_assembly:mRatBN7.2:6:90763220:90791976:-1 gene:ENSRNOG00000004794.9 transcript:ENSRNOT00000006373.5 gene_biotype:protein_coding transcript_biotype:protein_coding gene_symbol:Rtn1 description:reticulon 1 [Source:RGD Symbol;A	1	9	2	2	47.6	23.557	5822100	4481900	6228200	5.51073e+06	6689700	6035300	5906700	6.21057e+06	0.887316	0.294518
ENSRNOP00000006385	elongator acetyltransf	AABR07053185.1	ENSRNOP00000006385.8;ENSRNOP00000087949.1;ENSRNOP00000021604.5	ENSRNOP00000006385.8 pep primary_assembly:mRatBN7.2:3:92162280:92385243:-1 gene:ENSRNOG00000004787.8 transcript:ENSRNOT00000006385.8 gene_biotype:protein_coding transcript_biotype:protein_coding gene_symbol:AABR07053185.1 description:elongator acetyltransf	3	5	5	5	19.6	46.444	183980	190460	97118	157186	288260	185130	147210	206867	0.759842	0.391695
ENSRNOP00000006389	phospholipase C beta 1	Plcb1	ENSRNOP00000006389.7;ENSRNOP00000042533.5;ENSRNOP00000085919.1;ENSRNOP00000078760.1;ENSRNOP00000086367.1;ENSRNOP00000070903.2	ENSRNOP00000006389.7 pep primary_assembly:mRatBN7.2:3:122060031:122771268:1 gene:ENSRNOG00000004810.9 transcript:ENSRNOT00000006389.7 gene_biotype:protein_coding transcript_biotype:protein_coding gene_symbol:Plcb1 description:phospholipase C beta 1 [Source	6	57	57	57	56.6	138.34	17679000	17362000	17147000	17396000	18113000	16454000	17533000	1.73667e+07	1.00169	0.956896
ENSRNOP00000078855	ENY2, transcription and export co	Eny2	ENSRNOP00000078855.1;ENSRNOP00000078483.1;ENSRNOP00000006402.5;ENSRNOP00000083166.1	ENSRNOP00000078855.1 pep primary_assembly:mRatBN7.2:7:75596185:75605897:1 gene:ENSRNOG00000004681.6 transcript:ENSRNOT00000108113.1 gene_biotype:protein_coding transcript_biotype:protein_coding gene_symbol:Eny2 description:ENY2, transcription and export co	4	2	2	2	27.1	10.984	166160	184350	173460	174657	194960	194890	169930	186593	0.936028	0.292957
ENSRNOP00000006407	CRK proto-oncogene, adaptor prote	Crk	ENSRNOP00000006407.2;ENSRNOP00000094573.1	ENSRNOP00000006407.2 pep primary_assembly:mRatBN7.2:10:60530647:60553406:1 gene:ENSRNOG00000025792.5 transcript:ENSRNOT00000006407.5 gene_biotype:protein_coding transcript_biotype:protein_coding gene_symbol:Crk description:CRK proto-oncogene, adaptor prote	2	9	9	9	36.5	33.844	2331700	2262800	2263800	2286100	2161100	2121000	2320600	2200900	1.03871	0.260646
ENSRNOP00000092321	signal-regulatory protein alph	Sirpa	ENSRNOP00000092321.1;ENSRNOP00000006408.6;ENSRNOP00000087384.1;ENSRNOP00000083855.1;ENSRNOP00000082474.1	ENSRNOP00000092321.1 pep primary_assembly:mRatBN7.2:3:116823799:116858098:1 gene:ENSRNOG00000004763.8 transcript:ENSRNOT00000095684.1 gene_biotype:protein_coding transcript_biotype:protein_coding gene_symbol:Sirpa description:signal-regulatory protein alph	5	16	16	1	42	54.635	11990000	12331000	14310000	12877000	14223000	14713000	12977000	13971000	0.921695	0.285828
ENSRNOP00000081769	NADH:ubiquinone oxidoreducta	Ndufaf5	ENSRNOP00000081769.1;ENSRNOP00000006412.4	ENSRNOP00000081769.1 pep primary_assembly:mRatBN7.2:3:127507941:127537059:1 gene:ENSRNOG00000004784.7 transcript:ENSRNOT00000116882.1 gene_biotype:protein_coding transcript_biotype:protein_coding gene_symbol:Ndufaf5 description:NADH:ubiquinone oxidoreducta	2	1	1	1	3.7	36.054	74712	67884	63260	68618.7	84399	71252	68785	74812	0.917215	0.351469
ENSRNOP00000006438			ENSRNOP00000006438.5;ENSRNOP00000067100.3;ENSRNOP00000006741.7;ENSRNOP00000093532.1;ENSRNOP00000089759.1;ENSRNOP00000083463.1;ENSRNOP00000088324.1	ENSRNOP00000006438.5 pep primary_assembly:mRatBN7.2:X:34877866:35222747:-1 gene:ENSRNOG00000004322.9 transcript:ENSRNOT00000006438.7 gene_biotype:protein_coding transcript_biotype:protein_coding;ENSRNOP00000067100.3 pep primary_assembly:mRatBN7.2:X:3487786	7	13	13	12	28.1	75.2	730170	420130	699890	616730	672070	906750	708130	762317	0.809021	0.301177
ENSRNOP00000006443	reticulon 4	Rtn4	ENSRNOP00000006443.6;ENSRNOP00000006957.5;ENSRNOP00000042870.5	ENSRNOP00000006443.6 pep primary_assembly:mRatBN7.2:14:103449930:103497686:1 gene:ENSRNOG00000004621.9 transcript:ENSRNOT00000006443.8 gene_biotype:protein_coding transcript_biotype:protein_coding gene_symbol:Rtn4 description:reticulon 4 [Source:RGD Symbol	3	48	48	0	54.2	141.68	29571000	27618000	26420000	2.78697e+07	26717000	25346000	28437000	2.68333e+07	1.03862	0.464119
ENSRNOP00000006452	ribokinase	Rbks	ENSRNOP00000006452.5;ENSRNOP00000080640.1	ENSRNOP00000006452.5 pep primary_assembly:mRatBN7.2:6:24747293:24824290:1 gene:ENSRNOG00000004710.7 transcript:ENSRNOT00000006452.7 gene_biotype:protein_coding transcript_biotype:protein_coding gene_symbol:Rbks description:ribokinase [Source:RGD Symbol;Acc	2	3	3	3	15.7	33.044	221800	244480	169150	211810	212310	174350	93826	160162	1.32247	0.280739
ENSRNOP00000006459			ENSRNOP00000006459.4;ENSRNOP00000077171.1;ENSRNOP00000081748.1;ENSRNOP00000075221.2	ENSRNOP00000006459.4 pep primary_assembly:mRatBN7.2:X:107260898:107368314:1 gene:ENSRNOG00000004676.8 transcript:ENSRNOT00000006459.6 gene_biotype:protein_coding transcript_biotype:protein_coding;ENSRNOP00000077171.1 pep primary_assembly:mRatBN7.2:X:107260	4	21	14	9	50.4	60.71	4177900	4046000	4495100	4.23967e+06	4432900	5596800	4122400	4.71737e+06	0.898736	0.365214
ENSRNOP00000006473	L-2-hydroxyglutarate dehydroge	L2hgdh	ENSRNOP00000006473.3;ENSRNOP00000086446.1	ENSRNOP00000006473.3 pep primary_assembly:mRatBN7.2:6:88164440:88205536:-1 gene:ENSRNOG00000004857.5 transcript:ENSRNOT00000006473.5 gene_biotype:protein_coding transcript_biotype:protein_coding gene_symbol:L2hgdh description:L-2-hydroxyglutarate dehydroge	2	10	10	10	31.1	50.721	760790	965820	1062800	929803	913310	836960	754520	834930	1.11363	0.397064
ENSRNOP00000006483	ADP-ribosylation factor 2	Arf2	ENSRNOP00000006483.4;ENSRNOP00000077987.1;ENSRNOP00000082606.1	ENSRNOP00000006483.4 pep primary_assembly:mRatBN7.2:10:88867836:88889659:1 gene:ENSRNOG00000004807.7 transcript:ENSRNOT00000006483.6 gene_biotype:protein_coding transcript_biotype:protein_coding gene_symbol:Arf2 description:ADP-ribosylation factor 2 [Sourc	3	12	2	2	59.7	20.746	34939	64386		49662.5	57281	83474	32695	57816.7	0.858965	0.734147
ENSRNOP00000006492	YLP motif containing 1	Ylpm1	ENSRNOP00000006492.8;ENSRNOP00000073707.2;ENSRNOP00000070749.2	ENSRNOP00000006492.8 pep primary_assembly:mRatBN7.2:6:104642615:104718508:1 gene:ENSRNOG00000027317.7 transcript:ENSRNOT00000006492.8 gene_biotype:protein_coding transcript_biotype:protein_coding gene_symbol:Ylpm1 description:YLP motif containing 1 [Source	3	2	2	2	2.4	158.49	36184	37595	96967	56915.3	24177	23153	35863	27731	2.05241	0.226542
ENSRNOP00000006504	family with sequence similarit	Fam171b	ENSRNOP00000006504.6;ENSRNOP00000082253.1	ENSRNOP00000006504.6 pep primary_assembly:mRatBN7.2:3:68930822:68986127:1 gene:ENSRNOG00000004783.6 transcript:ENSRNOT00000006504.6 gene_biotype:protein_coding transcript_biotype:protein_coding gene_symbol:Fam171b description:family with sequence similarit	2	2	2	2	3.8	91.989		12742	20260	16501	26507	22364		24435.5	0.675288	0.20575
ENSRNOP00000006509	distal membrane arm assembly co	Dmac2l	ENSRNOP00000006509.4	ENSRNOP00000006509.4 pep primary_assembly:mRatBN7.2:6:88205700:88223933:1 gene:ENSRNOG00000004893.6 transcript:ENSRNOT00000006509.6 gene_biotype:protein_coding transcript_biotype:protein_coding gene_symbol:Dmac2l description:distal membrane arm assembly co	1	4	4	4	27	23.324	376810	401680	580510	453000	459420	512890	478930	483747	0.936441	0.665704
ENSRNOP00000006521	metastasis associated 1	Mta1	ENSRNOP00000006521.7;ENSRNOP00000076373.1;ENSRNOP00000051141.3;ENSRNOP00000084698.1;ENSRNOP00000080347.1;ENSRNOP00000095736.1;ENSRNOP00000093477.1;ENSRNOP00000084094.1;ENSRNOP00000068747.2;ENSRNOP00000084165.1;ENSRNOP00000058637.5	ENSRNOP00000006521.7 pep primary_assembly:mRatBN7.2:6:132178853:132217641:1 gene:ENSRNOG00000004711.8 transcript:ENSRNOT00000006521.7 gene_biotype:protein_coding transcript_biotype:protein_coding gene_symbol:Mta1 description:metastasis associated 1 [Source	11	4	4	3	7.5	81.259	393800	273040	306150	324330	259900	180140	221440	220493	1.47093	0.0720993
ENSRNOP00000006524	potassium voltage-gated channel	Kcna4	ENSRNOP00000006524.4	ENSRNOP00000006524.4 pep primary_assembly:mRatBN7.2:3:93756446:93769162:1 gene:ENSRNOG00000004918.6 transcript:ENSRNOT00000006524.6 gene_biotype:protein_coding transcript_biotype:protein_coding gene_symbol:Kcna4 description:potassium voltage-gated channel	1	3	3	3	7	73.455	368860	368100	335300	357420	417540	423090	352930	397853	0.898371	0.182344
ENSRNOP00000006525	solute carrier family 4 memb	Slc4a1ap	ENSRNOP00000006525.8;ENSRNOP00000085405.1	ENSRNOP00000006525.8 pep primary_assembly:mRatBN7.2:6:24905941:24933815:-1 gene:ENSRNOG00000004901.8 transcript:ENSRNOT00000006525.8 gene_biotype:protein_coding transcript_biotype:protein_coding gene_symbol:Slc4a1ap description:solute carrier family 4 memb	2	2	2	2	3.4	78.929	28939	30794	22308	27347	31560	33498	18193	27750.3	0.985466	0.944634
ENSRNOP00000006527	striatin	Strn	ENSRNOP00000006527.4;ENSRNOP00000093598.1	ENSRNOP00000006527.4 pep primary_assembly:mRatBN7.2:6:16335358:16417083:1 gene:ENSRNOG00000004806.6 transcript:ENSRNOT00000006527.6 gene_biotype:protein_coding transcript_biotype:protein_coding gene_symbol:Strn description:striatin [Source:RGD Symbol;Acc:3	2	20	20	20	37.1	86.14	5001100	4831600	4205500	4679400	4740500	4283300	4699300	4.57437e+06	1.02296	0.728988
ENSRNOP00000092115	FKBP prolyl isomerase 3	Fkbp3	ENSRNOP00000092115.1;ENSRNOP00000006531.4;ENSRNOP00000094377.1;ENSRNOP00000078353.1;ENSRNOP00000084972.1	ENSRNOP00000092115.1 pep primary_assembly:mRatBN7.2:6:83114082:83125522:-1 gene:ENSRNOG00000004629.7 transcript:ENSRNOT00000098200.1 gene_biotype:protein_coding transcript_biotype:protein_coding gene_symbol:Fkbp3 description:FKBP prolyl isomerase 3 [Source	5	9	9	9	43.7	24.934	1538300	1508600	1665600	1.57083e+06	1580300	1443600	1529300	1.51773e+06	1.03499	0.443576
ENSRNOP00000006542	SEC14-like lipid binding 2 [	Sec14l2	ENSRNOP00000006542.4;ENSRNOP00000090393.1;ENSRNOP00000079897.1;ENSRNOP00000093206.1;ENSRNOP00000006116.2;ENSRNOP00000089732.1;ENSRNOP00000069897.1;ENSRNOP00000074130.2;ENSRNOP00000006053.4	ENSRNOP00000006542.4 pep primary_assembly:mRatBN7.2:14:78973808:78993788:-1 gene:ENSRNOG00000004672.5 transcript:ENSRNOT00000006542.5 gene_biotype:protein_coding transcript_biotype:protein_coding gene_symbol:Sec14l2 description:SEC14-like lipid binding 2 [	9	19	19	19	62.5	46.191	4275300	5679500	4993600	4982800	5692400	5539600	4739800	5.32393e+06	0.935925	0.533765
ENSRNOP00000006549	pre-mRNA processing factor 40	Prpf40a	ENSRNOP00000006549.6;ENSRNOP00000083490.1;ENSRNOP00000083163.1	ENSRNOP00000006549.6 pep primary_assembly:mRatBN7.2:3:37629259:37689473:-1 gene:ENSRNOG00000004864.6 transcript:ENSRNOT00000006549.6 gene_biotype:protein_coding transcript_biotype:protein_coding gene_symbol:Prpf40a description:pre-mRNA processing factor 40	3	2	2	2	3.2	106.34	25279	28072	29707	27686	44461	20287	28013	30920.3	0.895398	0.678374
ENSRNOP00000006566	glucosamine (N-acetyl)-6-sulfatase	Gns	ENSRNOP00000006566.8;ENSRNOP00000062823.4	ENSRNOP00000006566.8 pep primary_assembly:mRatBN7.2:7:56894902:56923151:1 gene:ENSRNOG00000046159.3 transcript:ENSRNOT00000006566.7 gene_biotype:protein_coding transcript_biotype:protein_coding gene_symbol:Gns description:glucosamine (N-acetyl)-6-sulfatase	2	3	3	3	6.5	56.101	56958	23589	173710	84752.3	91288	86822		89055	0.951685	0.946252
ENSRNOP00000006567	secretion associated, Ras relat	Sar1b	ENSRNOP00000006567.3;ENSRNOP00000077131.1;ENSRNOP00000097629.1	ENSRNOP00000006567.3 pep primary_assembly:mRatBN7.2:10:36024382:36053594:1 gene:ENSRNOG00000004820.7 transcript:ENSRNOT00000006567.7 gene_biotype:protein_coding transcript_biotype:protein_coding gene_symbol:Sar1b description:secretion associated, Ras relat	3	8	4	4	53	22.41	192210	218230	159970	190137	177670	200380	177730	185260	1.02632	0.804784
ENSRNOP00000006570	RNA 2,3-cyclic phosphate and 5	Rtcb	ENSRNOP00000006570.4	ENSRNOP00000006570.4 pep primary_assembly:mRatBN7.2:7:17907705:17927132:1 gene:ENSRNOG00000004813.6 transcript:ENSRNOT00000006570.6 gene_biotype:protein_coding transcript_biotype:protein_coding gene_symbol:Rtcb description:RNA 2,3-cyclic phosphate and 5	1	15	1	1	39.1	53.652	221080	128580	126910	158857	144880	112300	253280	170153	0.933609	0.840944
ENSRNOP00000006578	proliferation-associated 2G4	Pa2g4	ENSRNOP00000006578.5;ENSRNOP00000091838.1;ENSRNOP00000085880.1;ENSRNOP00000069595.2	ENSRNOP00000006578.5 pep primary_assembly:mRatBN7.2:7:984807:992331:-1 gene:ENSRNOG00000004904.6 transcript:ENSRNOT00000006578.6 gene_biotype:protein_coding transcript_biotype:protein_coding gene_symbol:Pa2g4 description:proliferation-associated 2G4 [Sourc	4	15	15	15	50	42.983	2245100	2227900	2393000	2.28867e+06	2218600	2377500	2299000	2.29837e+06	0.99578	0.895959
ENSRNOP00000006582	extended synaptotagmin 2	Esyt2	ENSRNOP00000006582.7;ENSRNOP00000086527.1	ENSRNOP00000006582.7 pep primary_assembly:mRatBN7.2:6:137219707:137312590:1 gene:ENSRNOG00000032391.6 transcript:ENSRNOT00000006582.8 gene_biotype:protein_coding transcript_biotype:protein_coding gene_symbol:Esyt2 description:extended synaptotagmin 2 [Sour	2	8	8	8	16.8	94.099	366410	281170	311060	319547	186460	376430	402340	321743	0.993173	0.977277
ENSRNOP00000006584			ENSRNOP00000006584.5;ENSRNOP00000090944.1	ENSRNOP00000006584.5 pep primary_assembly:mRatBN7.2:X:31792207:31826667:1 gene:ENSRNOG00000004304.7 transcript:ENSRNOT00000006584.7 gene_biotype:protein_coding transcript_biotype:protein_coding;ENSRNOP00000090944.1 pep primary_assembly:mRatBN7.2:X:31792193	2	9	9	9	31.1	40.797	390120	170620	532800	364513	385850	382600	531760	433403	0.841049	0.585332
ENSRNOP00000006628	COMM domain containing 9	Commd9	ENSRNOP00000006628.3;ENSRNOP00000070509.2	ENSRNOP00000006628.3 pep primary_assembly:mRatBN7.2:3:88175987:88190439:1 gene:ENSRNOG00000004755.6 transcript:ENSRNOT00000006628.5 gene_biotype:protein_coding transcript_biotype:protein_coding gene_symbol:Commd9 description:COMM domain containing 9 [Sourc	2	7	7	7	57.1	21.974	466860	436850	437630	447113	462270	477180	470590	470013	0.951278	0.100783
ENSRNOP00000006637	synaptotagmin 2	Syt2	ENSRNOP00000006637.2	ENSRNOP00000006637.2 pep primary_assembly:mRatBN7.2:13:46185282:46193859:1 gene:ENSRNOG00000004756.5 transcript:ENSRNOT00000006637.5 gene_biotype:protein_coding transcript_biotype:protein_coding gene_symbol:Syt2 description:synaptotagmin 2 [Source:RGD Symb	1	14	7	7	33.4	47.237	842010	1008900	754350	868420	1052200	892850	769640	904897	0.95969	0.75839
ENSRNOP00000091595	NudC domain containing 1	Nudcd1	ENSRNOP00000091595.1;ENSRNOP00000006685.6	ENSRNOP00000091595.1 pep primary_assembly:mRatBN7.2:7:75551406:75595900:-1 gene:ENSRNOG00000024929.6 transcript:ENSRNOT00000102595.1 gene_biotype:protein_coding transcript_biotype:protein_coding gene_symbol:Nudcd1 description:NudC domain containing 1 [Sour	2	5	5	5	13.8	66.269	122600	134400	140960	132653	140370	128650	130050	133023	0.997219	0.957467
ENSRNOP00000091112	mitogen-activated protein kina	Map4k5	ENSRNOP00000091112.1;ENSRNOP00000006705.6;ENSRNOP00000092920.1	ENSRNOP00000091112.1 pep primary_assembly:mRatBN7.2:6:88284094:88376799:-1 gene:ENSRNOG00000004923.7 transcript:ENSRNOT00000105643.1 gene_biotype:protein_coding transcript_biotype:protein_coding gene_symbol:Map4k5 description:mitogen-activated protein kina	3	1	1	1	2	93.428	39416		37809	38612.5	34799	31889	23832	30173.3	1.27969	0.142987
ENSRNOP00000070514	cytoplasmic polyadenylation el	Cpeb2	ENSRNOP00000070514.2;ENSRNOP00000073259.2;ENSRNOP00000076988.1;ENSRNOP00000006727.8	ENSRNOP00000070514.2 pep primary_assembly:mRatBN7.2:14:67787507:67839614:-1 gene:ENSRNOG00000005043.8 transcript:ENSRNOT00000081878.2 gene_biotype:protein_coding transcript_biotype:protein_coding gene_symbol:Cpeb2 description:cytoplasmic polyadenylation el	4	5	2	2	8.7	81.106	244260	189520	23304	152361	176790	141290	201190	173090	0.880243	0.777815
ENSRNOP00000006753	FLII, actin remodeling protein	Flii	ENSRNOP00000006753.5	ENSRNOP00000006753.5 pep primary_assembly:mRatBN7.2:10:45394032:45407970:-1 gene:ENSRNOG00000004159.6 transcript:ENSRNOT00000006753.6 gene_biotype:protein_coding transcript_biotype:protein_coding gene_symbol:Flii description:FLII, actin remodeling protein	1	16	16	16	19.5	144.76	762760	752690	623240	712897	809800	716030	713260	746363	0.95516	0.575709
ENSRNOP00000006754	ribosomal protein L7a	Rpl7a	ENSRNOP00000006754.6;ENSRNOP00000049619.2;ENSRNOP00000063128.3;ENSRNOP00000095958.1;ENSRNOP00000063940.3;ENSRNOP00000039429.5;ENSRNOP00000047355.2;ENSRNOP00000094671.1;ENSRNOP00000097417.1;ENSRNOP00000045940.2;ENSRNOP00000045954.3;ENSRNOP00000079809.1;ENSRNOP00000049626.2;ENSRNOP00000042800.5;ENSRNOP00000077646.1;ENSRNOP00000042092.2;ENSRNOP00000046036.2;ENSRNOP00000073738.1	ENSRNOP00000006754.6 pep primary_assembly:mRatBN7.2:3:10239060:10241716:1 gene:ENSRNOG00000070974.1 transcript:ENSRNOT00000006754.7 gene_biotype:protein_coding transcript_biotype:protein_coding gene_symbol:Rpl7a description:ribosomal protein L7a [Source:RG	18	14	14	1	34.7	32.848	5201100	5349200	5341500	5.29727e+06	5201600	5198100	5569200	5.32297e+06	0.995172	0.85533
ENSRNOP00000006765	uridine phosphorylase 1	Upp1	ENSRNOP00000006765.5	ENSRNOP00000006765.5 pep primary_assembly:mRatBN7.2:14:83809960:83829462:1 gene:ENSRNOG00000004972.8 transcript:ENSRNOT00000006765.8 gene_biotype:protein_coding transcript_biotype:protein_coding gene_symbol:Upp1 description:uridine phosphorylase 1 [Source:	1	3	3	3	15.4	34.027	87391	73270	83173	81278	111070	70118	62842	81343.3	0.999197	0.996856
ENSRNOP00000006773	protein phosphatase 1, regula	Ppp1r12a	ENSRNOP00000006773.7;ENSRNOP00000069900.1;ENSRNOP00000078058.1;ENSRNOP00000040934.6;ENSRNOP00000045260.5;ENSRNOP00000096566.1;ENSRNOP00000080607.1	ENSRNOP00000006773.7 pep primary_assembly:mRatBN7.2:7:43482803:43591634:1 gene:ENSRNOG00000004925.9 transcript:ENSRNOT00000006773.9 gene_biotype:protein_coding transcript_biotype:protein_coding gene_symbol:Ppp1r12a description:protein phosphatase 1, regula	7	18	18	16	23.6	112.11	1558800	1463500	1537900	1.52007e+06	1604100	1403300	1470300	1.49257e+06	1.01842	0.697154
ENSRNOP00000006776	lysophosphatidylcholine acyltra	Lpcat4	ENSRNOP00000006776.7	ENSRNOP00000006776.7 pep primary_assembly:mRatBN7.2:3:99044729:99052875:1 gene:ENSRNOG00000005058.8 transcript:ENSRNOT00000006776.8 gene_biotype:protein_coding transcript_biotype:protein_coding gene_symbol:Lpcat4 description:lysophosphatidylcholine acyltra	1	4	4	4	14.8	57.148	358690	338670	235680	311013	281410	268560	298650	282873	1.09948	0.511437
ENSRNOP00000006777	glycoprotein m6b	Gpm6b	ENSRNOP00000006777.5;ENSRNOP00000097365.1	ENSRNOP00000006777.5 pep primary_assembly:mRatBN7.2:X:28060256:28101588:-1 gene:ENSRNOG00000004613.8 transcript:ENSRNOT00000006777.6 gene_biotype:protein_coding transcript_biotype:protein_coding gene_symbol:Gpm6b description:glycoprotein m6b [Source:RGD Sy	2	8	1	1	24.9	28.976	407430	400900	290840	366390	345470	322260	355100	340943	1.07464	0.550251
ENSRNOP00000088659	cysteine-rich protein 2	Crip2	ENSRNOP00000088659.1;ENSRNOP00000006804.3	ENSRNOP00000088659.1 pep primary_assembly:mRatBN7.2:6:132223429:132226065:1 gene:ENSRNOG00000005041.6 transcript:ENSRNOT00000108543.1 gene_biotype:protein_coding transcript_biotype:protein_coding gene_symbol:Crip2 description:cysteine-rich protein 2 [Sourc	2	4	4	4	50.3	21.206	1404000	1464200	2205600	1.69127e+06	1479400	1382000	1242500	1.36797e+06	1.23634	0.292229
ENSRNOP00000006835	cysteine rich protein 1	Crip1	ENSRNOP00000006835.3;ENSRNOP00000086909.1	ENSRNOP00000006835.3 pep primary_assembly:mRatBN7.2:6:132226746:132234620:1 gene:ENSRNOG00000027990.5 transcript:ENSRNOT00000006835.6 gene_biotype:protein_coding transcript_biotype:protein_coding gene_symbol:Crip1 description:cysteine rich protein 1 [Sourc	2	2	2	2	49.4	8.5497	111880	190150	172560	158197	189320	313100	200750	234390	0.674929	0.173447
ENSRNOP00000006849	VANGL planar cell polarity pr	Vangl2	ENSRNOP00000006849.5	ENSRNOP00000006849.5 pep primary_assembly:mRatBN7.2:13:84465527:84489378:-1 gene:ENSRNOG00000004889.7 transcript:ENSRNOT00000006849.6 gene_biotype:protein_coding transcript_biotype:protein_coding gene_symbol:Vangl2 description:VANGL planar cell polarity pr	1	1	1	1	3.5	59.77	20499		12304	16401.5	12033	7588.3		9810.65	1.67181	0.292964
ENSRNOP00000006874	NADH:ubiquinone oxidoreduct	Ndufaf1	ENSRNOP00000006874.6	ENSRNOP00000006874.6 pep primary_assembly:mRatBN7.2:3:106639851:106650212:-1 gene:ENSRNOG00000005006.7 transcript:ENSRNOT00000006874.7 gene_biotype:protein_coding transcript_biotype:protein_coding gene_symbol:Ndufaf1 description:NADH:ubiquinone oxidoreduct	1	3	3	3	10.7	37.781	105380	146080	140570	130677	142720	182480	152840	159347	0.820078	0.175916
ENSRNOP00000006888	immunoglobulin heavy constant	Ighm	ENSRNOP00000006888.8	ENSRNOP00000006888.8 pep primary_assembly:mRatBN7.2:6:132329269:133007729:-1 gene:ENSRNOG00000034190.7 transcript:ENSRNOT00000006888.8 gene_biotype:protein_coding transcript_biotype:protein_coding gene_symbol:Ighm description:immunoglobulin heavy constant	1	10	10	10	32.3	51.697	124330	2011200	135060	756863	165140	183170	35594	127968	5.91447	0.373901
ENSRNOP00000083310	small nuclear ribonucleoprote	Snrpb2	ENSRNOP00000083310.1;ENSRNOP00000006900.4	ENSRNOP00000083310.1 pep primary_assembly:mRatBN7.2:3:130399248:130408812:1 gene:ENSRNOG00000004967.8 transcript:ENSRNOT00000097908.1 gene_biotype:protein_coding transcript_biotype:protein_coding gene_symbol:Snrpb2 description:small nuclear ribonucleoprote	2	2	2	2	14.4	24.497	82057	8702.2	354430	148396	65916	133190	153610	117572	1.26217	0.790354
ENSRNOP00000006917	ATPase H+ transporting V1 sub	Atp6v1c1	ENSRNOP00000006917.4;ENSRNOP00000085031.1;ENSRNOP00000077433.1;ENSRNOP00000078142.1;ENSRNOP00000093823.1;ENSRNOP00000066981.3;ENSRNOP00000071116.2	ENSRNOP00000006917.4 pep primary_assembly:mRatBN7.2:7:69834489:69872278:1 gene:ENSRNOG00000004846.6 transcript:ENSRNOT00000006917.6 gene_biotype:protein_coding transcript_biotype:protein_coding gene_symbol:Atp6v1c1 description:ATPase H+ transporting V1 sub	7	29	29	29	71.5	43.9	22678000	20760000	21779000	21739000	22221000	20190000	22815000	21742000	0.999862	0.997678
ENSRNOP00000093985	potassium voltage-gated channel	Kcnq3	ENSRNOP00000093985.1;ENSRNOP00000065354.3;ENSRNOP00000006930.6	ENSRNOP00000093985.1 pep primary_assembly:mRatBN7.2:7:97730465:98025653:-1 gene:ENSRNOG00000005206.8 transcript:ENSRNOT00000109659.1 gene_biotype:protein_coding transcript_biotype:protein_coding gene_symbol:Kcnq3 description:potassium voltage-gated channel	3	4	4	3	6.9	96.896	341190	318630	315190	325003	335660	317720	324230	325870	0.99734	0.933062
ENSRNOP00000006942	protein tyrosine phosphatase,	Ptprn2	ENSRNOP00000006942.4;ENSRNOP00000093030.1	ENSRNOP00000006942.4 pep primary_assembly:mRatBN7.2:6:137439572:138191575:1 gene:ENSRNOG00000005003.5 transcript:ENSRNOT00000006942.5 gene_biotype:protein_coding transcript_biotype:protein_coding gene_symbol:Ptprn2 description:protein tyrosine phosphatase,	2	13	13	12	19.1	111.86	758020	707520	1355300	940280	1050600	1234400	950480	1.07849e+06	0.871846	0.570641
ENSRNOP00000006947	microtubule-associated protein	Mapt	ENSRNOP00000006947.6	ENSRNOP00000006947.6 pep primary_assembly:mRatBN7.2:10:89138627:89236129:1 gene:ENSRNOG00000005133.10 transcript:ENSRNOT00000006947.9 gene_biotype:protein_coding transcript_biotype:protein_coding gene_symbol:Mapt description:microtubule-associated protein	1	17	1	1	56.1	41.088	776250	483070	1014800	758040	704890	816900	691980	737923	1.02726	0.905307
ENSRNOP00000006961	integrin subunit alpha V	Itgav	ENSRNOP00000006961.8;ENSRNOP00000069681.2	ENSRNOP00000006961.8 pep primary_assembly:mRatBN7.2:3:68838189:68926639:1 gene:ENSRNOG00000004912.8 transcript:ENSRNOT00000006961.8 gene_biotype:protein_coding transcript_biotype:protein_coding gene_symbol:Itgav description:integrin subunit alpha V [Source	2	17	17	17	23.9	114.94	1820400	1647900	1438300	1.63553e+06	1629200	1571500	1601000	1.60057e+06	1.02185	0.769941
ENSRNOP00000072326	activin A receptor type 1	Acvr1	ENSRNOP00000072326.1;ENSRNOP00000006963.3	ENSRNOP00000072326.1 pep primary_assembly:mRatBN7.2:3:42978561:43098241:-1 gene:ENSRNOG00000005033.7 transcript:ENSRNOT00000087071.2 gene_biotype:protein_coding transcript_biotype:protein_coding gene_symbol:Acvr1 description:activin A receptor type 1 [Sour	2	2	2	2	5.1	59.258		29743	18564	24153.5	44658		28891	36774.5	0.6568	0.321563
ENSRNOP00000006975	immunoglobulin heavy constant	Ighg1	ENSRNOP00000006975.5	ENSRNOP00000006975.5 pep primary_assembly:mRatBN7.2:6:132389370:132393397:-1 gene:ENSRNOG00000030332.4 transcript:ENSRNOT00000006975.6 gene_biotype:protein_coding transcript_biotype:protein_coding gene_symbol:Ighg1 description:immunoglobulin heavy constant	1	8	5	5	32.2	35.945	183310	244040	1051800	493050	476730	308880	58719	281443	1.75186	0.526168
ENSRNOP00000006984	SMCR8-C9orf72 complex subunit [	Smcr8	ENSRNOP00000006984.5	ENSRNOP00000006984.5 pep primary_assembly:mRatBN7.2:10:45457605:45468876:1 gene:ENSRNOG00000005165.8 transcript:ENSRNOT00000006984.7 gene_biotype:protein_coding transcript_biotype:protein_coding gene_symbol:Smcr8 description:SMCR8-C9orf72 complex subunit [	1	5	5	5	7.3	105	288880	276320	254140	273113	303110	236530	272010	270550	1.00947	0.911866
ENSRNOP00000007002	solute carrier family 1 membe	Slc1a4	ENSRNOP00000007002.2	ENSRNOP00000007002.2 pep primary_assembly:mRatBN7.2:14:94529084:94560418:-1 gene:ENSRNOG00000005248.7 transcript:ENSRNOT00000007002.6 gene_biotype:protein_coding transcript_biotype:protein_coding gene_symbol:Slc1a4 description:solute carrier family 1 membe	1	8	8	8	19.3	55.9	2354600	3087700	3614300	3.01887e+06	3440200	3211900	3248800	3300300	0.914725	0.491503
ENSRNOP00000007087	phosphoribosylformylglycinamidi	Pfas	ENSRNOP00000007087.8	ENSRNOP00000007087.8 pep primary_assembly:mRatBN7.2:10:53691626:53708420:-1 gene:ENSRNOG00000005193.8 transcript:ENSRNOT00000007087.8 gene_biotype:protein_coding transcript_biotype:protein_coding gene_symbol:Pfas description:phosphoribosylformylglycinamidi	1	26	26	26	37.5	144.39	4004500	3863300	4060200	3976000	3558300	3917500	3612000	3.69593e+06	1.07578	0.0908353
ENSRNOP00000007091	cold shock domain containing C	Csdc2	ENSRNOP00000007091.5	ENSRNOP00000007091.5 pep primary_assembly:mRatBN7.2:7:113451998:113466463:1 gene:ENSRNOG00000005332.7 transcript:ENSRNOT00000007091.7 gene_biotype:protein_coding transcript_biotype:protein_coding gene_symbol:Csdc2 description:cold shock domain containing C	1	1	1	1	17.5	16.877	123950	86610		105280		665320	178730	422025	0.249464	0.323789
ENSRNOP00000078307	serine hydroxymethyltransferas	Shmt1	ENSRNOP00000078307.1;ENSRNOP00000007092.4	ENSRNOP00000078307.1 pep primary_assembly:mRatBN7.2:10:45468700:45490901:-1 gene:ENSRNOG00000005275.7 transcript:ENSRNOT00000105169.1 gene_biotype:protein_coding transcript_biotype:protein_coding gene_symbol:Shmt1 description:serine hydroxymethyltransferas	2	2	1	1	7.7	52.731	56775	29030	29849	38551.3	42692	26425	36512	35209.7	1.09491	0.761292
ENSRNOP00000007100	tyrosine 3-monooxygenase/trypto	Ywhae	ENSRNOP00000007100.3;ENSRNOP00000087010.1;ENSRNOP00000081735.1;ENSRNOP00000093614.1	ENSRNOP00000007100.3 pep primary_assembly:mRatBN7.2:10:60584717:60671589:1 gene:ENSRNOG00000005290.6 transcript:ENSRNOT00000007100.6 gene_biotype:protein_coding transcript_biotype:protein_coding gene_symbol:Ywhae description:tyrosine 3-monooxygenase/trypto	4	26	26	23	77.6	29.174	166010000	156030000	163760000	1.61933e+08	162630000	154570000	167570000	161590000	1.00212	0.946924
ENSRNOP00000007104	cannabinoid receptor interacti	Cnrip1	ENSRNOP00000007104.4;ENSRNOP00000071855.2;ENSRNOP00000095876.1	ENSRNOP00000007104.4 pep primary_assembly:mRatBN7.2:14:91463046:91492735:1 gene:ENSRNOG00000005326.7 transcript:ENSRNOT00000007104.7 gene_biotype:protein_coding transcript_biotype:protein_coding gene_symbol:Cnrip1 description:cannabinoid receptor interacti	3	7	7	7	53.7	18.658	10721000	11406000	11200000	11109000	12273000	10620000	12786000	11893000	0.934079	0.315792
ENSRNOP00000088639	nicalin	Ncln	ENSRNOP00000088639.1;ENSRNOP00000007110.6;ENSRNOP00000077163.1	ENSRNOP00000088639.1 pep primary_assembly:mRatBN7.2:7:8211996:8221934:1 gene:ENSRNOG00000004793.7 transcript:ENSRNOT00000106364.1 gene_biotype:protein_coding transcript_biotype:protein_coding gene_symbol:Ncln description:nicalin [Source:RGD Symbol;Acc:1309	3	7	7	7	16.1	58.3	538560	566330	538950	547947	609350	600750	564670	591590	0.926227	0.0571563
ENSRNOP00000084986	solute carrier family 12, memb	Slc12a6	ENSRNOP00000084986.1;ENSRNOP00000007144.6;ENSRNOP00000073931.2;ENSRNOP00000077276.1;ENSRNOP00000086289.1	ENSRNOP00000084986.1 pep primary_assembly:mRatBN7.2:3:99071391:99170258:1 gene:ENSRNOG00000005196.8 transcript:ENSRNOT00000099025.1 gene_biotype:protein_coding transcript_biotype:protein_coding gene_symbol:Slc12a6 description:solute carrier family 12, memb	5	6	3	2	7	125.96	118180	100240	97028	105149	134810	141000	98954	124921	0.841724	0.248881
ENSRNOP00000069213	transmembrane protein 11	Tmem11	ENSRNOP00000069213.1;ENSRNOP00000007158.5;ENSRNOP00000092112.1	ENSRNOP00000069213.1 pep primary_assembly:mRatBN7.2:10:45542755:45557570:-1 gene:ENSRNOG00000005377.7 transcript:ENSRNOT00000086206.2 gene_biotype:protein_coding transcript_biotype:protein_coding gene_symbol:Tmem11 description:transmembrane protein 11 [Sou	3	3	3	3	19.3	19.834	373110	485770	370690	409857	342730	498320	290730	377260	1.0864	0.678362
ENSRNOP00000007164	phosphomannomutase 1	Pmm1	ENSRNOP00000007164.4;ENSRNOP00000086897.1;ENSRNOP00000084966.1	ENSRNOP00000007164.4 pep primary_assembly:mRatBN7.2:7:113466632:113477022:-1 gene:ENSRNOG00000005358.6 transcript:ENSRNOT00000007164.6 gene_biotype:protein_coding transcript_biotype:protein_coding gene_symbol:Pmm1 description:phosphomannomutase 1 [Source:R	3	9	9	9	40.5	29.688	774340	768910	619940	721063	78981	767370	657200	501184	1.43872	0.372954
ENSRNOP00000007175	cystatin C	Cst3	ENSRNOP00000007175.5;ENSRNOP00000090275.1	ENSRNOP00000007175.5 pep primary_assembly:mRatBN7.2:3:136336920:136340819:-1 gene:ENSRNOG00000005195.7 transcript:ENSRNOT00000007175.7 gene_biotype:protein_coding transcript_biotype:protein_coding gene_symbol:Cst3 description:cystatin C [Source:RGD Symbol;	2	4	4	4	44.6	15.308	3734700	3781600	3506300	3674200	3034900	3515700	4942500	3.83103e+06	0.959062	0.799922
ENSRNOP00000007181	macrophage erythroblast attache	Maea	ENSRNOP00000007181.5	ENSRNOP00000007181.5 pep primary_assembly:mRatBN7.2:14:77357264:77390671:-1 gene:ENSRNOG00000005397.6 transcript:ENSRNOT00000007181.6 gene_biotype:protein_coding transcript_biotype:protein_coding gene_symbol:Maea description:macrophage erythroblast attache	1	5	5	5	16.5	43.537	125860	150560	158390	144937	42354	94859	173740	103651	1.39831	0.35406
ENSRNOP00000007223	SAC1 like phosphatidylinositi	Sacm1l	ENSRNOP00000007223.6;ENSRNOP00000080652.1	ENSRNOP00000007223.6 pep primary_assembly:mRatBN7.2:8:123186796:123232413:1 gene:ENSRNOG00000005149.7 transcript:ENSRNOT00000007223.6 gene_biotype:protein_coding transcript_biotype:protein_coding gene_symbol:Sacm1l description:SAC1 like phosphatidylinositi	2	17	17	17	38.4	63.99	1860500	1955000	1902400	1.90597e+06	1941300	2015600	1797200	1.91803e+06	0.993709	0.870956
ENSRNOP00000007247	inositol-trisphosphate 3-kinas	Itpka	ENSRNOP00000007247.1;ENSRNOP00000004032.5	ENSRNOP00000007247.1 pep primary_assembly:mRatBN7.2:3:106726036:106734600:1 gene:ENSRNOG00000005284.4 transcript:ENSRNOT00000007247.4 gene_biotype:protein_coding transcript_biotype:protein_coding gene_symbol:Itpka description:inositol-trisphosphate 3-kinas	2	21	21	21	58.2	50.87	9322900	8934900	7065900	8.44123e+06	9098000	7287500	8242400	8209300	1.02825	0.803211
ENSRNOP00000007249	proprotein convertase subtilis	Pcsk2	ENSRNOP00000007249.3;ENSRNOP00000085912.1	ENSRNOP00000007249.3 pep primary_assembly:mRatBN7.2:3:130880422:131183127:1 gene:ENSRNOG00000005438.6 transcript:ENSRNOT00000007249.5 gene_biotype:protein_coding transcript_biotype:protein_coding gene_symbol:Pcsk2 description:proprotein convertase subtilis	2	6	6	6	12.1	70.753	421210	411860	650640	494570	520520	500610	513840	511657	0.966605	0.837939
ENSRNOP00000090988	zinc finger CCCH-type containin	Zc3h15	ENSRNOP00000090988.1;ENSRNOP00000007276.4;ENSRNOP00000071553.1	ENSRNOP00000090988.1 pep primary_assembly:mRatBN7.2:3:68752033:68764333:1 gene:ENSRNOG00000005256.6 transcript:ENSRNOT00000094114.1 gene_biotype:protein_coding transcript_biotype:protein_coding gene_symbol:Zc3h15 description:zinc finger CCCH-type containin	3	3	3	3	11.3	48.208	69072	64653	78673	70799.3	63715	57380	74244	65113	1.08733	0.426307
ENSRNOP00000007287	acid phosphatase 1	Acp1	ENSRNOP00000007287.8;ENSRNOP00000081086.1;ENSRNOP00000095909.1;ENSRNOP00000082675.1	ENSRNOP00000007287.8 pep primary_assembly:mRatBN7.2:6:47506380:47521977:-1 gene:ENSRNOG00000005260.8 transcript:ENSRNOT00000007287.8 gene_biotype:protein_coding transcript_biotype:protein_coding gene_symbol:Acp1 description:acid phosphatase 1 [Source:RGD S	4	8	8	3	66.5	18.151	4172700	4044700	4486400	4234600	4166100	3117100	3619400	3634200	1.16521	0.143076
ENSRNOP00000089733	dihydrolipoamide S-succinyltran	Dlst	ENSRNOP00000089733.1;ENSRNOP00000007298.4;ENSRNOP00000077611.1	ENSRNOP00000089733.1 pep primary_assembly:mRatBN7.2:6:104758684:104783296:1 gene:ENSRNOG00000005061.6 transcript:ENSRNOT00000095379.1 gene_biotype:protein_coding transcript_biotype:protein_coding gene_symbol:Dlst description:dihydrolipoamide S-succinyltran	3	14	14	14	42.2	50.475	11910000	10735000	13796000	12147000	12175000	10818000	13988000	12327000	0.985398	0.894952
ENSRNOP00000007300	sorting nexin 6	Snx6	ENSRNOP00000007300.6;ENSRNOP00000081270.1	ENSRNOP00000007300.6 pep primary_assembly:mRatBN7.2:6:72231007:72315911:-1 gene:ENSRNOG00000005249.6 transcript:ENSRNOT00000007300.6 gene_biotype:protein_coding transcript_biotype:protein_coding gene_symbol:Snx6 description:sorting nexin 6 [Source:RGD Symb	2	14	14	12	38.4	45.759	1075800	1222300	1176700	1.15827e+06	1304900	1303800	1056700	1221800	0.948	0.532902
ENSRNOP00000007351	small nuclear ribonucleoprotein	Snrpf	ENSRNOP00000007351.4;ENSRNOP00000097415.1	ENSRNOP00000007351.4 pep primary_assembly:mRatBN7.2:7:28130427:28137129:-1 gene:ENSRNOG00000005556.6 transcript:ENSRNOT00000007351.6 gene_biotype:protein_coding transcript_biotype:protein_coding gene_symbol:Snrpf description:small nuclear ribonucleoprotein	2	2	2	2	24.4	9.7251	219620	201560	566270	329150	232920	369510	269220	290550	1.13285	0.773772
ENSRNOP00000069156			ENSRNOP00000069156.1;ENSRNOP00000081665.1;ENSRNOP00000007367.4	ENSRNOP00000069156.1 pep primary_assembly:mRatBN7.2:X:14348993:14352381:1 gene:ENSRNOG00000005387.7 transcript:ENSRNOT00000087033.2 gene_biotype:protein_coding transcript_biotype:protein_coding;ENSRNOP00000081665.1 pep primary_assembly:mRatBN7.2:X:14348910	3	1	1	1	12.2	16.127	94910	130300	102510	109240	137740	96116	83339	105732	1.03318	0.866858
ENSRNOP00000007374	hippocalcin-like 1	Hpcal1	ENSRNOP00000007374.3	ENSRNOP00000007374.3 pep primary_assembly:mRatBN7.2:6:40478208:40584687:1 gene:ENSRNOG00000005492.7 transcript:ENSRNOT00000007374.7 gene_biotype:protein_coding transcript_biotype:protein_coding gene_symbol:Hpcal1 description:hippocalcin-like 1 [Source:RGD	1	13	7	7	67.4	22.338	1539800	1251800	3487800	2.09313e+06	1858200	3030100	2192700	2.36033e+06	0.886796	0.750391
ENSRNOP00000007410	p21 (RAC1) activated kinase 5	Pak5	ENSRNOP00000007410.3	ENSRNOP00000007410.3 pep primary_assembly:mRatBN7.2:3:123396497:123703930:-1 gene:ENSRNOG00000005509.7 transcript:ENSRNOT00000007410.5 gene_biotype:protein_coding transcript_biotype:protein_coding gene_symbol:Pak5 description:p21 (RAC1) activated kinase 5	1	5	5	5	10	80.948	180990	136420	149490	155633	151460	107330	205410	154733	1.00582	0.978434
ENSRNOP00000081281	basic leucine zipper and W2 doma	Bzw2	ENSRNOP00000081281.1;ENSRNOP00000007414.2;ENSRNOP00000087032.1	ENSRNOP00000081281.1 pep primary_assembly:mRatBN7.2:6:52827661:52871376:-1 gene:ENSRNOG00000005096.6 transcript:ENSRNOT00000111628.1 gene_biotype:protein_coding transcript_biotype:protein_coding gene_symbol:Bzw2 description:basic leucine zipper and W2 doma	3	5	5	5	13.6	49.126	268540	264110	644520	392390	384630	254150	310920	316567	1.23952	0.595392
ENSRNOP00000007424	desumoylating isopeptidase 1	Desi1	ENSRNOP00000007424.5;ENSRNOP00000080939.1	ENSRNOP00000007424.5 pep primary_assembly:mRatBN7.2:7:113519980:113542816:-1 gene:ENSRNOG00000005577.7 transcript:ENSRNOT00000007424.5 gene_biotype:protein_coding transcript_biotype:protein_coding gene_symbol:Desi1 description:desumoylating isopeptidase 1	2	2	2	2	18.4	19.771	130330	162430	127280	140013	131760	138860	163350	144657	0.967901	0.768853
ENSRNOP00000059241	Y box binding protein 3	Ybx3	ENSRNOP00000059241.4;ENSRNOP00000007427.6	ENSRNOP00000059241.4 pep primary_assembly:mRatBN7.2:4:165129760:165153161:-1 gene:ENSRNOG00000005480.9 transcript:ENSRNOT00000068185.4 gene_biotype:protein_coding transcript_biotype:protein_coding gene_symbol:Ybx3 description:Y box binding protein 3 [Sourc	2	2	1	1	8.9	40.918	10162	13397		11779.5	11059		3417.8	7238.4	1.62736	0.387946
ENSRNOP00000007430	reactive intermediate imine deam	Rida	ENSRNOP00000007430.6	ENSRNOP00000007430.6 pep primary_assembly:mRatBN7.2:7:65691435:65705716:-1 gene:ENSRNOG00000005437.7 transcript:ENSRNOT00000007430.7 gene_biotype:protein_coding transcript_biotype:protein_coding gene_symbol:Rida description:reactive intermediate imine deam	1	7	7	7	58.5	20.233	5814900	4986500	4848600	5.21667e+06	4725700	3729700	4461900	4.30577e+06	1.21155	0.0981909
ENSRNOP00000007437	histidine triad nucleo	AABR07060778.1	ENSRNOP00000007437.1;ENSRNOP00000080711.1	ENSRNOP00000007437.1 pep primary_assembly:mRatBN7.2:4:92100973:92101568:-1 gene:ENSRNOG00000005630.3 transcript:ENSRNOT00000007437.3 gene_biotype:protein_coding transcript_biotype:protein_coding gene_symbol:AABR07060778.1 description:histidine triad nucleo	2	9	9	6	73.8	13.776	7637700	9447900	7705800	8263800	11751000	10935000	8811000	10499000	0.787104	0.102114
ENSRNOP00000007455	BMP/retinoic acid inducible n	Brinp2	ENSRNOP00000007455.8;ENSRNOP00000003788.2	ENSRNOP00000007455.8 pep primary_assembly:mRatBN7.2:13:70431010:70531810:-1 gene:ENSRNOG00000005592.9 transcript:ENSRNOT00000007455.8 gene_biotype:protein_coding transcript_biotype:protein_coding gene_symbol:Brinp2 description:BMP/retinoic acid inducible n	2	3	3	3	4.7	89.138	46646	58726	42319	49230.3	67854	81213	43662	64243	0.766314	0.280329
ENSRNOP00000079029	thyrotropin-releasing hormone d	Trhde	ENSRNOP00000079029.1;ENSRNOP00000007461.4	ENSRNOP00000079029.1 pep primary_assembly:mRatBN7.2:7:49948355:50367371:-1 gene:ENSRNOG00000005278.6 transcript:ENSRNOT00000109488.1 gene_biotype:protein_coding transcript_biotype:protein_coding gene_symbol:Trhde description:thyrotropin-releasing hormone d	2	2	2	2	2.4	114.05	59660	71846	39431	56979	78823	62872	49923	63872.7	0.892072	0.613874
ENSRNOP00000007464			ENSRNOP00000007464.7;ENSRNOP00000077616.1	ENSRNOP00000007464.7 pep primary_assembly:mRatBN7.2:X:14362860:14373727:1 gene:ENSRNOG00000039587.5 transcript:ENSRNOT00000007464.8 gene_biotype:protein_coding transcript_biotype:protein_coding	2	10	10	10	30.3	53.364	1605600	1605000	1588800	1599800	1716900	1722200	1612800	1.68397e+06	0.950019	0.0797749
ENSRNOP00000090102	fibroblast growth factor recepto	Frs2	ENSRNOP00000090102.1;ENSRNOP00000007472.4	ENSRNOP00000090102.1 pep primary_assembly:mRatBN7.2:7:52712845:52792695:-1 gene:ENSRNOG00000005642.7 transcript:ENSRNOT00000108286.1 gene_biotype:protein_coding transcript_biotype:protein_coding gene_symbol:Frs2 description:fibroblast growth factor recepto	2	1	1	1	3.6	56.434	17012	15282	14260	15518	13958	20157	9643.5	14586.2	1.06388	0.782431
ENSRNOP00000007498	G protein subunit alpha 11	Gna11	ENSRNOP00000007498.3;ENSRNOP00000081654.1	ENSRNOP00000007498.3 pep primary_assembly:mRatBN7.2:7:8163406:8179812:1 gene:ENSRNOG00000005446.5 transcript:ENSRNOT00000007498.5 gene_biotype:protein_coding transcript_biotype:protein_coding gene_symbol:Gna11 description:G protein subunit alpha 11 [Source	2	14	8	8	42.6	42.044	1740800	1809900	1745300	1.76533e+06	1718200	1729700	1708000	1.71863e+06	1.02717	0.114241
ENSRNOP00000090319	LIM and cysteine-rich domains	Lmcd1	ENSRNOP00000090319.1;ENSRNOP00000007523.4	ENSRNOP00000090319.1 pep primary_assembly:mRatBN7.2:4:145423707:145452046:1 gene:ENSRNOG00000005690.6 transcript:ENSRNOT00000117173.1 gene_biotype:protein_coding transcript_biotype:protein_coding gene_symbol:Lmcd1 description:LIM and cysteine-rich domains	2	3	3	3	13.8	39.92	126790	160760	214190	167247	213940	171620	171230	185597	0.90113	0.562792
ENSRNOP00000069777	paralemmin 3	Palm3	ENSRNOP00000069777.2;ENSRNOP00000007535.5	ENSRNOP00000069777.2 pep primary_assembly:mRatBN7.2:19:24122239:24126144:-1 gene:ENSRNOG00000005729.7 transcript:ENSRNOT00000085630.2 gene_biotype:protein_coding transcript_biotype:protein_coding gene_symbol:Palm3 description:paralemmin 3 [Source:RGD Symbo	2	8	8	8	19.5	75.779	328060	355570	438540	374057	467980	457530	415970	447160	0.836516	0.117986
ENSRNOP00000007554	VAMP associated protein B and C	Vapb	ENSRNOP00000007554.2	ENSRNOP00000007554.2 pep primary_assembly:mRatBN7.2:3:162535905:162573763:1 gene:ENSRNOG00000005331.5 transcript:ENSRNOT00000007554.5 gene_biotype:protein_coding transcript_biotype:protein_coding gene_symbol:Vapb description:VAMP associated protein B and C	1	10	9	9	52.3	26.916	3928900	3711100	3843000	3.82767e+06	3837100	3979300	3781400	3.86593e+06	0.990102	0.681098
ENSRNOP00000007567	NDUFA4, mitochondrial complex	Ndufa4	ENSRNOP00000007567.4;ENSRNOP00000096418.1;ENSRNOP00000093714.1	ENSRNOP00000007567.4 pep primary_assembly:mRatBN7.2:4:40002216:40008418:-1 gene:ENSRNOG00000005512.5 transcript:ENSRNOT00000007567.5 gene_biotype:protein_coding transcript_biotype:protein_coding gene_symbol:Ndufa4 description:NDUFA4, mitochondrial complex	3	6	6	6	52.7	8.4946	15290000	14442000	18847000	16193000	16543000	15032000	17599000	1.63913e+07	0.9879	0.903825
ENSRNOP00000007572	glutamate metabotropic receptor 3	Grm3	ENSRNOP00000007572.6;ENSRNOP00000069396.1;ENSRNOP00000096683.1	ENSRNOP00000007572.6 pep primary_assembly:mRatBN7.2:4:24365115:24609804:1 gene:ENSRNOG00000005519.8 transcript:ENSRNOT00000007572.8 gene_biotype:protein_coding transcript_biotype:protein_coding gene_symbol:Grm3 description:glutamate metabotropic receptor 3	3	11	10	10	18.2	98.959	2037100	2234300	2013900	2095100	2112600	1894900	1886700	1.96473e+06	1.06635	0.269494
ENSRNOP00000007578	BMP/retinoic acid inducible ne	Brinp1	ENSRNOP00000007578.2	ENSRNOP00000007578.2 pep primary_assembly:mRatBN7.2:5:82348930:82493150:-1 gene:ENSRNOG00000005561.5 transcript:ENSRNOT00000007578.5 gene_biotype:protein_coding transcript_biotype:protein_coding gene_symbol:Brinp1 description:BMP/retinoic acid inducible ne	1	8	8	8	15.7	88.621	585190	676350	432030	564523	553470	563320	448060	521617	1.08226	0.621267
ENSRNOP00000007609	visinin-like 1	Vsnl1	ENSRNOP00000007609.3	ENSRNOP00000007609.3 pep primary_assembly:mRatBN7.2:6:34038642:34159479:-1 gene:ENSRNOG00000005345.6 transcript:ENSRNOT00000007609.6 gene_biotype:protein_coding transcript_biotype:protein_coding gene_symbol:Vsnl1 description:visinin-like 1 [Source:RGD Symb	1	19	19	15	84.3	22.142	26839000	27285000	24625000	2.62497e+07	24890000	23351000	25744000	2.46617e+07	1.06439	0.215461
ENSRNOP00000007612	ER membrane protein complex subu	Emc4	ENSRNOP00000007612.6	ENSRNOP00000007612.6 pep primary_assembly:mRatBN7.2:3:99169711:99174729:-1 gene:ENSRNOG00000005719.6 transcript:ENSRNOT00000007612.6 gene_biotype:protein_coding transcript_biotype:protein_coding gene_symbol:Emc4 description:ER membrane protein complex subu	1	2	2	2	21.3	20.116	67550		187800	127675	159300	266490	96334	174041	0.73359	0.595101
ENSRNOP00000007620	cullin 1	Cul1	ENSRNOP00000007620.5;ENSRNOP00000076905.1;ENSRNOP00000074678.2;ENSRNOP00000094688.1;ENSRNOP00000081597.1	ENSRNOP00000007620.5 pep primary_assembly:mRatBN7.2:4:76552463:76620235:1 gene:ENSRNOG00000005310.7 transcript:ENSRNOT00000007620.7 gene_biotype:protein_coding transcript_biotype:protein_coding gene_symbol:Cul1 description:cullin 1 [Source:RGD Symbol;Acc:1	5	20	20	20	36.6	88.722	2136200	2034100	1763300	1.97787e+06	2167100	1939500	1912300	2006300	0.985828	0.846267
ENSRNOP00000070579	serine/threonine-protein phosphatase 2A catalytic		ENSRNOP00000070579.1;ENSRNOP00000007621.3;ENSRNOP00000071286.2;ENSRNOP00000084457.1	ENSRNOP00000070579.1 pep primary_assembly:mRatBN7.2:11:82278292:82280174:1 gene:ENSRNOG00000001893.7 transcript:ENSRNOT00000002599.7 gene_biotype:protein_coding transcript_biotype:protein_coding description:serine/threonine-protein phosphatase 2A catalytic	4	14	14	1	63.4	35.523	13300000	13681000	13821000	1.36007e+07	14409000	14021000	13567000	13999000	0.971546	0.239977
ENSRNOP00000092279	ADP-ribosylation factor like GTPa	Arl1	ENSRNOP00000092279.1;ENSRNOP00000007623.7	ENSRNOP00000092279.1 pep primary_assembly:mRatBN7.2:7:23121638:23131898:1 gene:ENSRNOG00000005763.8 transcript:ENSRNOT00000103837.1 gene_biotype:protein_coding transcript_biotype:protein_coding gene_symbol:Arl1 description:ADP-ribosylation factor like GTPa	2	6	6	6	54.7	20.379	580310	695340	658930	644860	576190	685490	705450	655710	0.983453	0.846636
ENSRNOP00000096556	succinate-CoA ligase GDP/ADP-	Suclg1	ENSRNOP00000096556.1;ENSRNOP00000089480.1;ENSRNOP00000007624.4;ENSRNOP00000086059.1	ENSRNOP00000096556.1 pep primary_assembly:mRatBN7.2:4:105315526:105337600:1 gene:ENSRNOG00000005587.5 transcript:ENSRNOT00000099700.1 gene_biotype:protein_coding transcript_biotype:protein_coding gene_symbol:Suclg1 description:succinate-CoA ligase GDP/ADP-	4	10	10	10	46.1	34.236	13691000	13169000	15199000	1.40197e+07	14005000	13308000	15015000	1.41093e+07	0.993645	0.914545
ENSRNOP00000007641	syntaxin 17	Stx17	ENSRNOP00000007641.2	ENSRNOP00000007641.2 pep primary_assembly:mRatBN7.2:5:62446187:62504451:1 gene:ENSRNOG00000005801.7 transcript:ENSRNOT00000007641.5 gene_biotype:protein_coding transcript_biotype:protein_coding gene_symbol:Stx17 description:syntaxin 17 [Source:RGD Symbol;A	1	2	2	2	11.6	33.182	36287	44840	66799	49308.7	66979	53844	46981	55934.7	0.88154	0.573261
ENSRNOP00000007645	dehydrogenase/reductase 7	Dhrs7	ENSRNOP00000007645.7;ENSRNOP00000079632.1	ENSRNOP00000007645.7 pep primary_assembly:mRatBN7.2:6:91332262:91347892:-1 gene:ENSRNOG00000005589.7 transcript:ENSRNOT00000007645.7 gene_biotype:protein_coding transcript_biotype:protein_coding gene_symbol:Dhrs7 description:dehydrogenase/reductase 7 [Sour	2	9	9	9	32	38.31	1077000	1097700	710590	961763	1011800	873100	801990	895630	1.07384	0.661298
ENSRNOP00000088046	RAS guanyl releasing protei	Rasgrp1	ENSRNOP00000088046.1;ENSRNOP00000007687.5;ENSRNOP00000094823.1;ENSRNOP00000080984.1;ENSRNOP00000090995.1	ENSRNOP00000088046.1 pep primary_assembly:mRatBN7.2:3:104170013:104230056:-1 gene:ENSRNOG00000005404.6 transcript:ENSRNOT00000114986.1 gene_biotype:protein_coding transcript_biotype:protein_coding gene_symbol:Rasgrp1 description:RAS guanyl releasing protei	5	12	12	12	27	86.467	841210	845960	517760	734977	770810	689830	688710	716450	1.02586	0.876603
ENSRNOP00000092864	endosome-lysosome associated	Elapor2	ENSRNOP00000092864.1;ENSRNOP00000007723.8;ENSRNOP00000087058.1	ENSRNOP00000092864.1 pep primary_assembly:mRatBN7.2:4:24613163:24805729:-1 gene:ENSRNOG00000005818.8 transcript:ENSRNOT00000100645.1 gene_biotype:protein_coding transcript_biotype:protein_coding gene_symbol:Elapor2 description:endosome-lysosome associated	3	3	3	3	5.8	113.57	79160	71140	84010	78103.3	76179	72993	87779	78983.7	0.988854	0.887739
ENSRNOP00000007763	eukaryotic translation initiati	Eif2b4	ENSRNOP00000007763.5;ENSRNOP00000092958.1	ENSRNOP00000007763.5 pep primary_assembly:mRatBN7.2:6:25183186:25188829:1 gene:ENSRNOG00000005301.7 transcript:ENSRNOT00000007763.6 gene_biotype:protein_coding transcript_biotype:protein_coding gene_symbol:Eif2b4 description:eukaryotic translation initiati	2	7	7	7	21.8	57.809	391060	387470	382660	387063	386100	386030	414390	395507	0.978652	0.435361
ENSRNOP00000007766	ADP ribosylation factor guanine	Arfgef1	ENSRNOP00000007766.6;ENSRNOP00000089172.1;ENSRNOP00000076394.1	ENSRNOP00000007766.6 pep primary_assembly:mRatBN7.2:5:8982061:9076312:1 gene:ENSRNOG00000005703.8 transcript:ENSRNOT00000007766.8 gene_biotype:protein_coding transcript_biotype:protein_coding gene_symbol:Arfgef1 description:ADP ribosylation factor guanine	3	29	29	22	24.8	202.06	1891400	1814000	1767800	1824400	2071600	2140300	1614200	1.94203e+06	0.939428	0.524727
ENSRNOP00000007773	thioesterase superfamily membe	Them6	ENSRNOP00000007773.4	ENSRNOP00000007773.4 pep primary_assembly:mRatBN7.2:7:106606570:106609746:1 gene:ENSRNOG00000005929.7 transcript:ENSRNOT00000007773.7 gene_biotype:protein_coding transcript_biotype:protein_coding gene_symbol:Them6 description:thioesterase superfamily membe	1	12	12	12	58	23.747	868970	922180	708620	833257	993620	942560	925180	953787	0.87363	0.1482
ENSRNOP00000007779	Rho GDP dissociation inhibi	Arhgdib	ENSRNOP00000007779.5;ENSRNOP00000083858.1	ENSRNOP00000007779.5 pep primary_assembly:mRatBN7.2:4:169822954:169841658:-1 gene:ENSRNOG00000005809.8 transcript:ENSRNOT00000007779.8 gene_biotype:protein_coding transcript_biotype:protein_coding gene_symbol:Arhgdib description:Rho GDP dissociation inhibi	2	2	2	2	17.5	22.884	93197	91169	115200	99855.3	58560	107440	78708	81569.3	1.22418	0.320422
ENSRNOP00000007788	contactin 4	Cntn4	ENSRNOP00000007788.5;ENSRNOP00000069502.2;ENSRNOP00000086586.1	ENSRNOP00000007788.5 pep primary_assembly:mRatBN7.2:4:139099152:139621090:1 gene:ENSRNOG00000005652.8 transcript:ENSRNOT00000007788.7 gene_biotype:protein_coding transcript_biotype:protein_coding gene_symbol:Cntn4 description:contactin 4 [Source:RGD Symbol	3	4	4	3	6.1	113.39	140670	99668	166600	135646	133140	94937	96644	108240	1.25319	0.301615
ENSRNOP00000007794	destrin, actin depolymerizing f	Dstn	ENSRNOP00000007794.5;ENSRNOP00000035048.6	ENSRNOP00000007794.5 pep primary_assembly:mRatBN7.2:3:131284648:131311379:1 gene:ENSRNOG00000005924.7 transcript:ENSRNOT00000007794.7 gene_biotype:protein_coding transcript_biotype:protein_coding gene_symbol:Dstn description:destrin, actin depolymerizing f	2	12	11	11	77.6	18.533	8122200	9161600	8794700	8.69283e+06	7702700	8052400	7054700	7.60327e+06	1.1433	0.0611859
ENSRNOP00000007812	multiple EGF-like-domains 9	Megf9	ENSRNOP00000007812.4	ENSRNOP00000007812.4 pep primary_assembly:mRatBN7.2:5:83993565:84105622:-1 gene:ENSRNOG00000005932.5 transcript:ENSRNOT00000007812.5 gene_biotype:protein_coding transcript_biotype:protein_coding gene_symbol:Megf9 description:multiple EGF-like-domains 9 [So	1	3	3	3	8.3	62.886	86566	80838	69251	78885	90818	69734	67755	76102.3	1.03656	0.771805
ENSRNOP00000007816	glutamate-rich 5	Erich5	ENSRNOP00000007816.7	ENSRNOP00000007816.7 pep primary_assembly:mRatBN7.2:7:65657204:65680207:1 gene:ENSRNOG00000005956.7 transcript:ENSRNOT00000007816.7 gene_biotype:protein_coding transcript_biotype:protein_coding gene_symbol:Erich5 description:glutamate-rich 5 [Source:RGD Sy	1	2	2	2	9.7	39.504	42989		43945	43467	42681	61866	10944	38497	1.1291	0.812227
ENSRNOP00000090193	leptin receptor overlapping t	Leprot	ENSRNOP00000090193.1;ENSRNOP00000007859.5;ENSRNOP00000096213.1	ENSRNOP00000090193.1 pep primary_assembly:mRatBN7.2:5:116294139:116301988:1 gene:ENSRNOG00000050849.3 transcript:ENSRNOT00000097926.1 gene_biotype:protein_coding transcript_biotype:protein_coding gene_symbol:Leprot description:leptin receptor overlapping t	3	1	1	1	10.3	14.326	50642	61764	53258	55221.3	46667	68972	47461	54366.7	1.01572	0.920468
ENSRNOP00000089436	hydroxysteroid 11-beta deh	Hsd11b1	ENSRNOP00000089436.1;ENSRNOP00000007870.5;ENSRNOP00000050581.3	ENSRNOP00000089436.1 pep primary_assembly:mRatBN7.2:13:104748829:104788687:-1 gene:ENSRNOG00000005861.7 transcript:ENSRNOT00000116672.1 gene_biotype:protein_coding transcript_biotype:protein_coding gene_symbol:Hsd11b1 description:hydroxysteroid 11-beta deh	3	3	3	3	11	32.154	105220	80498	230070	138596	3180.5	197070	227770	142674	0.971421	0.963688
ENSRNOP00000095215	thioredoxin-related transmembran	Tmx2	ENSRNOP00000095215.1;ENSRNOP00000007914.3	ENSRNOP00000095215.1 pep primary_assembly:mRatBN7.2:3:69754939:69762587:-1 gene:ENSRNOG00000005308.5 transcript:ENSRNOT00000109083.1 gene_biotype:protein_coding transcript_biotype:protein_coding gene_symbol:Tmx2 description:thioredoxin-related transmembran	2	5	5	5	23.7	29.514	499270	473270	707770	560103	518760	693330	590690	600927	0.932066	0.673148
ENSRNOP00000078306	tRNA-histidine guanylyltransfe	Thg1l	ENSRNOP00000078306.1;ENSRNOP00000007917.5	ENSRNOP00000078306.1 pep primary_assembly:mRatBN7.2:10:30387940:30396687:-1 gene:ENSRNOG00000005539.8 transcript:ENSRNOT00000099031.1 gene_biotype:protein_coding transcript_biotype:protein_coding gene_symbol:Thg1l description:tRNA-histidine guanylyltransfe	2	2	2	2	17.6	27.967	59324	96326	63314	72988	70695	62887	55716	63099.3	1.15672	0.473089
ENSRNOP00000007972	catenin alpha 2	Ctnna2	ENSRNOP00000007972.8;ENSRNOP00000070637.2	ENSRNOP00000007972.8 pep primary_assembly:mRatBN7.2:4:109294842:110443522:-1 gene:ENSRNOG00000006003.8 transcript:ENSRNOT00000007971.8 gene_biotype:protein_coding transcript_biotype:protein_coding gene_symbol:Ctnna2 description:catenin alpha 2 [Source:RGD	2	41	41	19	59.6	101.88	10815000	10773000	10417000	1.06683e+07	11071000	11025000	10502000	10866000	0.981809	0.423379
ENSRNOP00000091292	HCLS1 binding protein 3	Hs1bp3	ENSRNOP00000091292.1;ENSRNOP00000007991.6	ENSRNOP00000091292.1 pep primary_assembly:mRatBN7.2:6:31196145:31222835:1 gene:ENSRNOG00000006062.8 transcript:ENSRNOT00000109303.1 gene_biotype:protein_coding transcript_biotype:protein_coding gene_symbol:Hs1bp3 description:HCLS1 binding protein 3 [Source	2	8	8	8	28	42.501	385800	390980	346190	374323	312030	369820	373950	351933	1.06362	0.412252
ENSRNOP00000007994	ganglioside-induced differentiati	Gdap1	ENSRNOP00000007994.5	ENSRNOP00000007994.5 pep primary_assembly:mRatBN7.2:5:1932613:2030061:-1 gene:ENSRNOG00000005850.7 transcript:ENSRNOT00000007994.7 gene_biotype:protein_coding transcript_biotype:protein_coding gene_symbol:Gdap1 description:ganglioside-induced differentiati	1	12	12	12	37.9	47.908	5067300	4793000	4983500	4.94793e+06	4355000	5045100	4604000	4.66803e+06	1.05996	0.267518
ENSRNOP00000007998	synaptosome associated protei	Snap25	ENSRNOP00000007998.7;ENSRNOP00000008734.7	ENSRNOP00000007998.7 pep primary_assembly:mRatBN7.2:3:124041898:124123760:1 gene:ENSRNOG00000006037.9 transcript:ENSRNOT00000007998.8 gene_biotype:protein_coding transcript_biotype:protein_coding gene_symbol:Snap25 description:synaptosome associated protei	2	21	3	3	79.1	23.336	233940	206950	282020	240970	231660	365070	254300	283677	0.849453	0.412201
ENSRNOP00000008018	sulfite oxidase	Suox	ENSRNOP00000008018.3;ENSRNOP00000089321.1	ENSRNOP00000008018.3 pep primary_assembly:mRatBN7.2:7:1103152:1107038:-1 gene:ENSRNOG00000005987.6 transcript:ENSRNOT00000008018.6 gene_biotype:protein_coding transcript_biotype:protein_coding gene_symbol:Suox description:sulfite oxidase [Source:RGD Symbol	2	11	11	11	34.6	60.805	791400	670820	738530	733583	790530	690390	623310	701410	1.04587	0.619214
ENSRNOP00000008035	3-oxoacyl-ACP synthase, mitochondr	Oxsm	ENSRNOP00000008035.4	ENSRNOP00000008035.4 pep primary_assembly:mRatBN7.2:15:9210547:9214558:1 gene:ENSRNOG00000005993.7 transcript:ENSRNOT00000008035.6 gene_biotype:protein_coding transcript_biotype:protein_coding gene_symbol:Oxsm description:3-oxoacyl-ACP synthase, mitochondr	1	7	7	7	27	48.004	217950	216660	361680	265430	257470	280560	291950	276660	0.959409	0.830589
ENSRNOP00000008041	catenin alpha 1	Ctnna1	ENSRNOP00000008041.5	ENSRNOP00000008041.5 pep primary_assembly:mRatBN7.2:18:26728485:26860910:1 gene:ENSRNOG00000005796.8 transcript:ENSRNOT00000008041.8 gene_biotype:protein_coding transcript_biotype:protein_coding gene_symbol:Ctnna1 description:catenin alpha 1 [Source:RGD Sy	1	25	17	16	40.4	100.24	1743200	1879100	1645400	1755900	1641500	1660000	1785900	1695800	1.03544	0.502007
ENSRNOP00000008126	solute carrier family 30 membe	Slc30a3	ENSRNOP00000008126.5;ENSRNOP00000090098.1	ENSRNOP00000008126.5 pep primary_assembly:mRatBN7.2:6:25277445:25284497:1 gene:ENSRNOG00000006204.8 transcript:ENSRNOT00000008126.8 gene_biotype:protein_coding transcript_biotype:protein_coding gene_symbol:Slc30a3 description:solute carrier family 30 membe	2	9	9	9	26.5	41.898	2626700	2358300	1717500	2.23417e+06	2439100	2343400	2740700	2.50773e+06	0.890911	0.40635
ENSRNOP00000008138	solute carrier family 38, m	Slc38a1	ENSRNOP00000008138.3	ENSRNOP00000008138.3 pep primary_assembly:mRatBN7.2:7:127738226:127802218:-1 gene:ENSRNOG00000005291.7 transcript:ENSRNOT00000008138.5 gene_biotype:protein_coding transcript_biotype:protein_coding gene_symbol:Slc38a1 description:solute carrier family 38, m	1	1	1	1	2.3	53.846	73299	57064	105870	78744.3	64222	60945		62583.5	1.25823	0.448098
ENSRNOP00000008140	methyltransferase like 2	Mettl2	ENSRNOP00000008140.6;ENSRNOP00000085553.1	ENSRNOP00000008140.6 pep primary_assembly:mRatBN7.2:10:90095527:90119528:1 gene:ENSRNOG00000006131.8 transcript:ENSRNOT00000008140.7 gene_biotype:protein_coding transcript_biotype:protein_coding gene_symbol:Mettl2 description:methyltransferase like 2 [Sour	2	1	1	1	4	39.716	501030		488490	494760	339880	490430	161470	330593	1.49658	0.273703
ENSRNOP00000080989	nicastrin	Ncstn	ENSRNOP00000080989.1;ENSRNOP00000008150.3	ENSRNOP00000080989.1 pep primary_assembly:mRatBN7.2:13:84530446:84546454:-1 gene:ENSRNOG00000005355.8 transcript:ENSRNOT00000109609.1 gene_biotype:protein_coding transcript_biotype:protein_coding gene_symbol:Ncstn description:nicastrin [Source:RGD Symbol;A	2	3	3	3	9	67.169	132900	163280	145990	147390	153370	145490	143640	147500	0.999254	0.99112
ENSRNOP00000008153	junctophilin 1	Jph1	ENSRNOP00000008153.3	ENSRNOP00000008153.3 pep primary_assembly:mRatBN7.2:5:2030281:2125284:1 gene:ENSRNOG00000006110.6 transcript:ENSRNOT00000008153.6 gene_biotype:protein_coding transcript_biotype:protein_coding gene_symbol:Jph1 description:junctophilin 1 [Source:RGD Symbol;A	1	4	4	4	9.7	72.025	256920	183210	92668	177599	40882	57754	192900	97178.7	1.82755	0.300001
ENSRNOP00000082508	sodium voltage-gated channel a	Scn8a	ENSRNOP00000082508.1;ENSRNOP00000008160.7;ENSRNOP00000075703.2	ENSRNOP00000082508.1 pep primary_assembly:mRatBN7.2:7:131982480:132151292:1 gene:ENSRNOG00000005309.8 transcript:ENSRNOT00000114577.1 gene_biotype:protein_coding transcript_biotype:protein_coding gene_symbol:Scn8a description:sodium voltage-gated channel a	3	12	7	7	8.3	220.69	446680	347380	207740	333933	339630	317730	377100	344820	0.968428	0.886254
ENSRNOP00000008163	ADP-ribosylation factor like GT	Arl8a	ENSRNOP00000008163.4	ENSRNOP00000008163.4 pep primary_assembly:mRatBN7.2:13:46585845:46594851:1 gene:ENSRNOG00000005988.5 transcript:ENSRNOT00000008164.5 gene_biotype:protein_coding transcript_biotype:protein_coding gene_symbol:Arl8a description:ADP-ribosylation factor like GT	1	11	11	5	55.9	21.39	6232900	6835900	6745600	6604800	8131400	7740100	6585400	7.48563e+06	0.88233	0.15331
ENSRNOP00000008193	cleavage and polyadenylation sp	Cpsf6	ENSRNOP00000008193.6;ENSRNOP00000094948.1	ENSRNOP00000008193.6 pep primary_assembly:mRatBN7.2:7:52956589:52988100:-1 gene:ENSRNOG00000005927.7 transcript:ENSRNOT00000008193.7 gene_biotype:protein_coding transcript_biotype:protein_coding gene_symbol:Cpsf6 description:cleavage and polyadenylation sp	2	4	4	4	9.6	59.179	247270	296120	272430	271940	244210	279190	278990	267463	1.01674	0.818574
ENSRNOP00000008200	leucine-rich pentatricopeptide re	Lrpprc	ENSRNOP00000008200.6	ENSRNOP00000008200.6 pep primary_assembly:mRatBN7.2:6:9859867:9942293:1 gene:ENSRNOG00000005877.7 transcript:ENSRNOT00000008200.7 gene_biotype:protein_coding transcript_biotype:protein_coding gene_symbol:Lrpprc description:leucine-rich pentatricopeptide re	1	54	54	54	45.3	157.4	7620900	7652300	8126500	7799900	7316900	8215000	7830900	7787600	1.00158	0.96999
ENSRNOP00000008210	spectrin, beta, non-erythro	Sptbn1	ENSRNOP00000008210.7;ENSRNOP00000071233.2	ENSRNOP00000008210.7 pep primary_assembly:mRatBN7.2:14:103842684:104008507:-1 gene:ENSRNOG00000005434.8 transcript:ENSRNOT00000008210.7 gene_biotype:protein_coding transcript_biotype:protein_coding gene_symbol:Sptbn1 description:spectrin, beta, non-erythro	2	168	168	154	72.4	273.82	186360000	182020000	162820000	1.77067e+08	177670000	159290000	176180000	1.71047e+08	1.0352	0.553928
ENSRNOP00000008211	carboxypeptidase Q	Cpq	ENSRNOP00000008211.4;ENSRNOP00000095981.1	ENSRNOP00000008211.4 pep primary_assembly:mRatBN7.2:7:64264159:64724546:1 gene:ENSRNOG00000005931.7 transcript:ENSRNOT00000008211.7 gene_biotype:protein_coding transcript_biotype:protein_coding gene_symbol:Cpq description:carboxypeptidase Q [Source:RGD Sym	2	8	8	8	31.8	52.041	1093400	985420	937680	1005500	1111000	1235800	1062800	1.13653e+06	0.884708	0.130912
ENSRNOP00000008238	protein phosphatase, Mg2+/Mn2+ d	Ppm1a	ENSRNOP00000008238.4	ENSRNOP00000008238.4 pep primary_assembly:mRatBN7.2:6:91438834:91480697:1 gene:ENSRNOG00000005916.7 transcript:ENSRNOT00000008238.6 gene_biotype:protein_coding transcript_biotype:protein_coding gene_symbol:Ppm1a description:protein phosphatase, Mg2+/Mn2+ d	1	11	11	11	37.9	53.464	1930600	1965600	1964300	1953500	1907400	2066300	1907900	1.96053e+06	0.996413	0.902855
ENSRNOP00000008274	galectin-like	Lgalsl	ENSRNOP00000008274.5;ENSRNOP00000091381.1	ENSRNOP00000008274.5 pep primary_assembly:mRatBN7.2:14:94996995:95004499:-1 gene:ENSRNOG00000005464.6 transcript:ENSRNOT00000008274.6 gene_biotype:protein_coding transcript_biotype:protein_coding gene_symbol:Lgalsl description:galectin-like [Source:RGD Sym	2	9	9	9	60.5	18.955	2227100	2549600	2357700	2.37813e+06	2587300	2394900	2256200	2412800	0.985632	0.808791
ENSRNOP00000008282	G protein-coupled receptor 3	Gpr37l1	ENSRNOP00000008282.3	ENSRNOP00000008282.3 pep primary_assembly:mRatBN7.2:13:46598578:46605421:-1 gene:ENSRNOG00000006237.7 transcript:ENSRNOT00000008282.7 gene_biotype:protein_coding transcript_biotype:protein_coding gene_symbol:Gpr37l1 description:G protein-coupled receptor 3	1	7	7	7	14.6	52.845	2441300	2345200	2027400	2271300	2298500	2217800	2018600	2178300	1.04269	0.569325
ENSRNOP00000008285	fasciculation and elongation prot	Fez1	ENSRNOP00000008285.3	ENSRNOP00000008285.3 pep primary_assembly:mRatBN7.2:8:36544535:36589683:1 gene:ENSRNOG00000006075.4 transcript:ENSRNOT00000008285.4 gene_biotype:protein_coding transcript_biotype:protein_coding gene_symbol:Fez1 description:fasciculation and elongation prot	1	2	2	2	7.1	45.243		96868	37130	66999	110490	75465	52641	79532	0.842416	0.713972
ENSRNOP00000086683	N-glycanase 1	Ngly1	ENSRNOP00000086683.1;ENSRNOP00000083143.1;ENSRNOP00000008289.6	ENSRNOP00000086683.1 pep primary_assembly:mRatBN7.2:15:9153738:9204573:-1 gene:ENSRNOG00000006143.7 transcript:ENSRNOT00000116474.1 gene_biotype:protein_coding transcript_biotype:protein_coding gene_symbol:Ngly1 description:N-glycanase 1 [Source:RGD Symbol	3	3	3	3	11.5	67.063	12947	8982.4	44786	22238.5	39538	29214		34376	0.646918	0.481005
ENSRNOP00000080108	CDP-L-ribitol pyrophosphorylase	Crppa	ENSRNOP00000080108.1;ENSRNOP00000008312.4;ENSRNOP00000090565.1;ENSRNOP00000086474.1;ENSRNOP00000073650.2	ENSRNOP00000080108.1 pep primary_assembly:mRatBN7.2:6:53121438:53397028:1 gene:ENSRNOG00000006199.7 transcript:ENSRNOT00000109606.1 gene_biotype:protein_coding transcript_biotype:protein_coding gene_symbol:Crppa description:CDP-L-ribitol pyrophosphorylase	5	2	2	2	9.8	43.718	94891	137860	68676	100476	86623	59935	82824	76460.7	1.31408	0.332867
ENSRNOP00000008329	SEC61 translocon subunit beta [	Sec61b	ENSRNOP00000008329.4	ENSRNOP00000008329.4 pep primary_assembly:mRatBN7.2:5:61773594:61781804:1 gene:ENSRNOG00000006345.8 transcript:ENSRNOT00000008329.8 gene_biotype:protein_coding transcript_biotype:protein_coding gene_symbol:Sec61b description:SEC61 translocon subunit beta [	1	3	3	3	37.5	9.9884	322200	319190	382850	341413	219690	367930	391840	326487	1.04572	0.80863
ENSRNOP00000008337	aconitase 1	Aco1	ENSRNOP00000008337.3	ENSRNOP00000008337.3 pep primary_assembly:mRatBN7.2:5:55259827:55315872:1 gene:ENSRNOG00000005849.8 transcript:ENSRNOT00000008337.5 gene_biotype:protein_coding transcript_biotype:protein_coding gene_symbol:Aco1 description:aconitase 1 [Source:RGD Symbol;Ac	1	25	1	1	42.4	93.619		55925	58375	57150	23675	59123		41399	1.38047	0.468845
ENSRNOP00000008342	solute carrier family 6 memb	Slc6a11	ENSRNOP00000008342.3	ENSRNOP00000008342.3 pep primary_assembly:mRatBN7.2:4:147297969:147413443:1 gene:ENSRNOG00000005697.6 transcript:ENSRNOT00000008342.6 gene_biotype:protein_coding transcript_biotype:protein_coding gene_symbol:Slc6a11 description:solute carrier family 6 memb	1	8	8	8	15.3	69.946	2527200	2753300	3709700	2.99673e+06	2958400	3716300	2456600	3.04377e+06	0.984548	0.931646
ENSRNOP00000008355	splicing factor 3a, subunit 1 [	Sf3a1	ENSRNOP00000008355.4	ENSRNOP00000008355.4 pep primary_assembly:mRatBN7.2:14:79031394:79052144:1 gene:ENSRNOG00000005218.6 transcript:ENSRNOT00000008355.6 gene_biotype:protein_coding transcript_biotype:protein_coding gene_symbol:Sf3a1 description:splicing factor 3a, subunit 1 [	1	9	9	9	16.3	88.587	564500	535090	551040	550210	536440	538230	456090	510253	1.07831	0.232042
ENSRNOP00000008356	calumenin	Calu	ENSRNOP00000008356.4;ENSRNOP00000088242.1	ENSRNOP00000008356.4 pep primary_assembly:mRatBN7.2:4:57949047:57976593:1 gene:ENSRNOG00000006197.8 transcript:ENSRNOT00000008356.6 gene_biotype:protein_coding transcript_biotype:protein_coding gene_symbol:Calu description:calumenin [Source:RGD Symbol;Acc:	2	10	10	2	45.2	36.736	696330	674640	985160	785377	723750	835260	758760	772590	1.01655	0.90926
ENSRNOP00000081323	pumilio RNA-binding family member	Pum2	ENSRNOP00000081323.1;ENSRNOP00000089681.1;ENSRNOP00000008359.5;ENSRNOP00000074592.2	ENSRNOP00000081323.1 pep primary_assembly:mRatBN7.2:6:31463320:31542976:1 gene:ENSRNOG00000006180.8 transcript:ENSRNOT00000108134.1 gene_biotype:protein_coding transcript_biotype:protein_coding gene_symbol:Pum2 description:pumilio RNA-binding family member	4	2	2	2	2.7	106.15	77585	86700	21996	62093.7	78483	83105	62001	74529.7	0.83314	0.589162
ENSRNOP00000008364	ER membrane protein complex subun	Emc7	ENSRNOP00000008364.6	ENSRNOP00000008364.6 pep primary_assembly:mRatBN7.2:3:99263980:99274360:1 gene:ENSRNOG00000005884.8 transcript:ENSRNOT00000008364.8 gene_biotype:protein_coding transcript_biotype:protein_coding gene_symbol:Emc7 description:ER membrane protein complex subun	1	3	3	3	22.4	26.44	79884	62451	100860	81065	83122	109230	74356	88902.7	0.91184	0.63468
ENSRNOP00000089780	methylenetetrahydrofolate dehyd	Mthfd1	ENSRNOP00000089780.1;ENSRNOP00000084672.1;ENSRNOP00000081958.1;ENSRNOP00000008374.3;ENSRNOP00000077791.1;ENSRNOP00000084897.1	ENSRNOP00000089780.1 pep primary_assembly:mRatBN7.2:6:94978076:95045371:1 gene:ENSRNOG00000005602.6 transcript:ENSRNOT00000100467.1 gene_biotype:protein_coding transcript_biotype:protein_coding gene_symbol:Mthfd1 description:methylenetetrahydrofolate dehyd	6	23	23	23	32	100.79	2905100	2655400	2524900	2.69513e+06	2685000	2354700	2386000	2.47523e+06	1.08884	0.224937
ENSRNOP00000008410	syntaxin 18	Stx18	ENSRNOP00000008410.5;ENSRNOP00000082982.1;ENSRNOP00000078715.1	ENSRNOP00000008410.5 pep primary_assembly:mRatBN7.2:14:72671464:72761464:-1 gene:ENSRNOG00000006139.8 transcript:ENSRNOT00000008410.6 gene_biotype:protein_coding transcript_biotype:protein_coding gene_symbol:Stx18 description:syntaxin 18 [Source:RGD Symbol	3	2	2	2	3.6	41.683	38695	32031	35140	35288.7	35805	33807	23278	30963.3	1.13969	0.375006
ENSRNOP00000008416	A-kinase anchoring protein 5	Akap5	ENSRNOP00000008416.4;ENSRNOP00000094047.1	ENSRNOP00000008416.4 pep primary_assembly:mRatBN7.2:6:95051560:95057025:1 gene:ENSRNOG00000006410.6 transcript:ENSRNOT00000008416.6 gene_biotype:protein_coding transcript_biotype:protein_coding gene_symbol:Akap5 description:A-kinase anchoring protein 5 [So	2	17	17	17	35.7	72.798	3925100	3982800	4911000	4.27297e+06	4342700	5062400	4581400	4.66217e+06	0.91652	0.367234
ENSRNOP00000008427	serine and arginine rich splic	Srsf6	ENSRNOP00000008427.5;ENSRNOP00000079743.1;ENSRNOP00000013301.4;ENSRNOP00000086011.1	ENSRNOP00000008427.5 pep primary_assembly:mRatBN7.2:3:151589535:151594860:1 gene:ENSRNOG00000006380.7 transcript:ENSRNOT00000008427.7 gene_biotype:protein_coding transcript_biotype:protein_coding gene_symbol:Srsf6 description:serine and arginine rich splic	4	3	3	2	8.3	39.025	335610	439590	541420	438873	366110	513430	458610	446050	0.983911	0.92675
ENSRNOP00000079874	HECT domain E3 ubiquitin prote	Hectd1	ENSRNOP00000079874.1;ENSRNOP00000008459.7	ENSRNOP00000079874.1 pep primary_assembly:mRatBN7.2:6:69181436:69268053:-1 gene:ENSRNOG00000006905.8 transcript:ENSRNOT00000108705.1 gene_biotype:protein_coding transcript_biotype:protein_coding gene_symbol:Hectd1 description:HECT domain E3 ubiquitin prote	2	5	5	4	2.8	281.98	128400	116540	89491	111477	174010	176070	109470	153183	0.727736	0.16673
ENSRNOP00000008477	voltage-dependent anion channel	Vdac1	ENSRNOP00000008477.4;ENSRNOP00000088882.1;ENSRNOP00000093638.1;ENSRNOP00000083811.1;ENSRNOP00000088933.1;ENSRNOP00000082707.1;ENSRNOP00000083249.1	ENSRNOP00000008477.4 pep primary_assembly:mRatBN7.2:10:36532244:36559640:1 gene:ENSRNOG00000006375.7 transcript:ENSRNOT00000008477.6 gene_biotype:protein_coding transcript_biotype:protein_coding gene_symbol:Vdac1 description:voltage-dependent anion channel	7	21	21	21	80.9	30.755	77493000	72444000	96210000	82049000	83716000	87078000	84661000	8.51517e+07	0.963563	0.692606
ENSRNOP00000074241	apoptosis inducing factor, mi	Aifm1	ENSRNOP00000074241.1;ENSRNOP00000008503.3	ENSRNOP00000074241.1 pep primary_assembly:mRatBN7.2:X:127650226:127689246:-1 gene:ENSRNOG00000006067.7 transcript:ENSRNOT00000084848.2 gene_biotype:protein_coding transcript_biotype:protein_coding gene_symbol:Aifm1 description:apoptosis inducing factor, mi	2	16	16	16	38	66.133	2637100	2503000	2978400	2.70617e+06	2730600	2847100	2802100	2.79327e+06	0.968818	0.581729
ENSRNOP00000008504	heat shock protein family A (Hsp	Hspa2	ENSRNOP00000008504.3	ENSRNOP00000008504.3 pep primary_assembly:mRatBN7.2:6:95128350:95131287:1 gene:ENSRNOG00000006472.6 transcript:ENSRNOT00000008504.6 gene_biotype:protein_coding transcript_biotype:protein_coding gene_symbol:Hspa2 description:heat shock protein family A (Hsp	1	27	14	13	50.1	69.641	1900800	1694600	1666000	1753800	1831500	1762100	1682300	1.75863e+06	0.997252	0.957683
ENSRNOP00000008507	BLOC-1 related complex subunit	Borcs6	ENSRNOP00000008507.4	ENSRNOP00000008507.4 pep primary_assembly:mRatBN7.2:10:53758093:53762632:1 gene:ENSRNOG00000006513.6 transcript:ENSRNOT00000008507.6 gene_biotype:protein_coding transcript_biotype:protein_coding gene_symbol:Borcs6 description:BLOC-1 related complex subunit	1	4	4	4	21.7	37.827	93708	115050	122180	110313	141940	198700	95418	145353	0.758931	0.322407
ENSRNOP00000008525	galactokinase 1	Galk1	ENSRNOP00000008525.3;ENSRNOP00000097443.1	ENSRNOP00000008525.3 pep primary_assembly:mRatBN7.2:10:101242588:101247337:-1 gene:ENSRNOG00000006359.6 transcript:ENSRNOT00000008525.6 gene_biotype:protein_coding transcript_biotype:protein_coding gene_symbol:Galk1 description:galactokinase 1 [Source:RGD	2	6	6	6	15.6	42.36	611980	626610	636210	624933	593510	611100	627770	610793	1.02315	0.308969
ENSRNOP00000080338	CCA tRNA nucleotidyl	AABR07005533.1	ENSRNOP00000080338.1;ENSRNOP00000008527.6;ENSRNOP00000080320.1;ENSRNOP00000086151.1	ENSRNOP00000080338.1 pep primary_assembly:mRatBN7.2:1:170721272:170722576:-1 gene:ENSRNOG00000020477.5 transcript:ENSRNOT00000027758.5 gene_biotype:protein_coding transcript_biotype:protein_coding gene_symbol:AABR07005533.1 description:CCA tRNA nucleotidyl	4	6	6	6	18.9	49.861	337460	414040	482750	411417	306010	353990	331770	330590	1.24449	0.141399
ENSRNOP00000088169	tubulin, gamma 2	Tubg2	ENSRNOP00000088169.1;ENSRNOP00000008576.5;ENSRNOP00000089474.1	ENSRNOP00000088169.1 pep primary_assembly:mRatBN7.2:10:86091299:86097580:1 gene:ENSRNOG00000006494.6 transcript:ENSRNOT00000098365.1 gene_biotype:protein_coding transcript_biotype:protein_coding gene_symbol:Tubg2 description:tubulin, gamma 2 [Source:RGD Sy	3	7	2	2	29.3	51.113		36308	61956	49132	180020	49907		114964	0.42737	0.425428
ENSRNOP00000008608	macrophage migration inhibitory f	Mif	ENSRNOP00000008608.3;ENSRNOP00000074316.2;ENSRNOP00000038962.1;ENSRNOP00000008621.4	ENSRNOP00000008608.3 pep primary_assembly:mRatBN7.2:20:12790902:12791784:1 gene:ENSRNOG00000006589.5 transcript:ENSRNOT00000008608.5 gene_biotype:protein_coding transcript_biotype:protein_coding gene_symbol:Mif description:macrophage migration inhibitory f	4	6	6	2	89.6	12.477	21421000	25917000	21682000	2.30067e+07	28274000	27043000	17949000	24422000	0.942047	0.711794
ENSRNOP00000008614	nectin cell adhesion molecule	Nectin1	ENSRNOP00000008614.6;ENSRNOP00000078728.1	ENSRNOP00000008614.6 pep primary_assembly:mRatBN7.2:8:44101776:44164863:1 gene:ENSRNOG00000006403.8 transcript:ENSRNOT00000008614.8 gene_biotype:protein_coding transcript_biotype:protein_coding gene_symbol:Nectin1 description:nectin cell adhesion molecule	2	9	9	9	27	57.156	943310	876740	1244300	1021450	1070500	1205100	1143600	1.13973e+06	0.896218	0.378566
ENSRNOP00000008637	piccolo (presynaptic cytomatrix	Pclo	ENSRNOP00000008637.8;ENSRNOP00000007608.8	ENSRNOP00000008637.8 pep primary_assembly:mRatBN7.2:4:19695315:20049885:-1 gene:ENSRNOG00000005726.10 transcript:ENSRNOT00000008637.9 gene_biotype:protein_coding transcript_biotype:protein_coding gene_symbol:Pclo description:piccolo (presynaptic cytomatrix	2	128	124	124	39.9	552.78	18844000	18722000	15489000	17685000	19542000	17641000	18291000	1.84913e+07	0.956394	0.548544
ENSRNOP00000008645	BLOC-1 related complex subuni	Borcs5	ENSRNOP00000008645.4	ENSRNOP00000008645.4 pep primary_assembly:mRatBN7.2:4:167473177:167540993:1 gene:ENSRNOG00000006505.8 transcript:ENSRNOT00000008645.8 gene_biotype:protein_coding transcript_biotype:protein_coding gene_symbol:Borcs5 description:BLOC-1 related complex subuni	1	3	3	3	20	22.176	190540	46728	195150	144139	177720	196790	155290	176600	0.816191	0.552941
ENSRNOP00000096045	transmembrane protein 106B	Tmem106b	ENSRNOP00000096045.1;ENSRNOP00000008677.3;ENSRNOP00000074432.1	ENSRNOP00000096045.1 pep primary_assembly:mRatBN7.2:4:41328060:41345583:1 gene:ENSRNOG00000006206.8 transcript:ENSRNOT00000098571.1 gene_biotype:protein_coding transcript_biotype:protein_coding gene_symbol:Tmem106b description:transmembrane protein 106B [S	3	3	3	3	16.4	30.242	164660	155750	123380	147930	86483	121370	102250	103368	1.43111	0.0503922
ENSRNOP00000008680	transmembrane protein 70	Tmem70	ENSRNOP00000008680.4	ENSRNOP00000008680.4 pep primary_assembly:mRatBN7.2:5:2637102:2654729:-1 gene:ENSRNOG00000006608.6 transcript:ENSRNOT00000008680.6 gene_biotype:protein_coding transcript_biotype:protein_coding gene_symbol:Tmem70 description:transmembrane protein 70 [Source	1	1	1	1	4.3	28.399	50480	53407	41336	48407.7	54442	49166		51804	0.934439	0.552237
ENSRNOP00000079974	Thy-1 cell surface antigen	Thy1	ENSRNOP00000079974.1;ENSRNOP00000008685.2	ENSRNOP00000079974.1 pep primary_assembly:mRatBN7.2:8:44390079:44394659:1 gene:ENSRNOG00000006604.4 transcript:ENSRNOT00000095277.1 gene_biotype:protein_coding transcript_biotype:protein_coding gene_symbol:Thy1 description:Thy-1 cell surface antigen [Sourc	2	6	6	6	34.2	20.868	31449000	32834000	31396000	31893000	31800000	32956000	32578000	3.24447e+07	0.982997	0.396031
ENSRNOP00000008687	mediator of cell motility 1	Memo1	ENSRNOP00000008687.4;ENSRNOP00000086324.1;ENSRNOP00000080510.1;ENSRNOP00000093193.1;ENSRNOP00000087011.1	ENSRNOP00000008687.4 pep primary_assembly:mRatBN7.2:6:21144638:21234561:1 gene:ENSRNOG00000006340.7 transcript:ENSRNOT00000008687.6 gene_biotype:protein_coding transcript_biotype:protein_coding gene_symbol:Memo1 description:mediator of cell motility 1 [Sou	5	5	5	5	29	33.679	92422	189330	102010	127921	157690	164720	153630	158680	0.806155	0.377232
ENSRNOP00000008698	threonine synthase-like 2	Thnsl2	ENSRNOP00000008698.5	ENSRNOP00000008698.5 pep primary_assembly:mRatBN7.2:4:103112963:103132017:-1 gene:ENSRNOG00000006508.7 transcript:ENSRNOT00000008698.7 gene_biotype:protein_coding transcript_biotype:protein_coding gene_symbol:Thnsl2 description:threonine synthase-like 2 [S	1	6	6	6	20.5	54.049	206540	214050	474240	298277	277770	298090	397840	324567	0.919	0.79675
ENSRNOP00000097069			ENSRNOP00000097069.1;ENSRNOP00000008719.6	ENSRNOP00000097069.1 pep primary_assembly:mRatBN7.2:4:51397601:51595218:1 gene:ENSRNOG00000006030.7 transcript:ENSRNOT00000116498.1 gene_biotype:protein_coding transcript_biotype:protein_coding;ENSRNOP00000008719.6 pep primary_assembly:mRatBN7.2:4:51397601	2	28	28	28	14.4	254.46	14290000	14267000	15492000	14683000	14600000	15162000	16104000	1.52887e+07	0.960385	0.367574
ENSRNOP00000008728	protein disulfide isomerase fam	Pdia4	ENSRNOP00000008728.4;ENSRNOP00000090963.1	ENSRNOP00000008728.4 pep primary_assembly:mRatBN7.2:4:76803254:76822107:-1 gene:ENSRNOG00000006228.6 transcript:ENSRNOT00000008728.6 gene_biotype:protein_coding transcript_biotype:protein_coding gene_symbol:Pdia4 description:protein disulfide isomerase fam	2	13	13	13	28.1	72.747	1066900	1073300	1123100	1.08777e+06	885410	978680	1081100	981730	1.10801	0.147945
ENSRNOP00000086822	eukaryotic translation initia	Eif2b2	ENSRNOP00000086822.1;ENSRNOP00000008730.2	ENSRNOP00000086822.1 pep primary_assembly:mRatBN7.2:6:104866753:104873353:1 gene:ENSRNOG00000006467.5 transcript:ENSRNOT00000107973.1 gene_biotype:protein_coding transcript_biotype:protein_coding gene_symbol:Eif2b2 description:eukaryotic translation initia	2	5	5	5	21.5	39.983	489230	244860	293300	342463	379180	346220	355100	360167	0.950847	0.825786
ENSRNOP00000008736	ATPase H+ transporting V0 su	Atp6v0c	ENSRNOP00000008736.4;ENSRNOP00000088542.1;ENSRNOP00000087132.1	ENSRNOP00000008736.4 pep primary_assembly:mRatBN7.2:10:13196207:13201206:-1 gene:ENSRNOG00000006542.7 transcript:ENSRNOT00000008736.7 gene_biotype:protein_coding transcript_biotype:protein_coding gene_symbol:Atp6v0c description:ATPase H+ transporting V0 su	3	1	1	1	11.8	15.548	3569800	4362600	4263400	4.06527e+06	5636000	6316600	3956700	5303100	0.766583	0.171632
ENSRNOP00000008737	FKBP prolyl isomerase 4	Fkbp4	ENSRNOP00000008737.6;ENSRNOP00000078521.1	ENSRNOP00000008737.6 pep primary_assembly:mRatBN7.2:4:161703379:161711833:-1 gene:ENSRNOG00000006444.7 transcript:ENSRNOT00000008737.7 gene_biotype:protein_coding transcript_biotype:protein_coding gene_symbol:Fkbp4 description:FKBP prolyl isomerase 4 [Sour	2	21	21	21	54.4	51.45	3233400	2987600	2788900	3003300	2763300	2952700	3110400	2.94213e+06	1.02079	0.726644
ENSRNOP00000063542	solute carrier family 4 membe	Slc4a7	ENSRNOP00000063542.4;ENSRNOP00000081091.1;ENSRNOP00000008759.7;ENSRNOP00000097556.1;ENSRNOP00000078594.1;ENSRNOP00000047758.5	ENSRNOP00000063542.4 pep primary_assembly:mRatBN7.2:15:10588979:10664764:-1 gene:ENSRNOG00000005957.8 transcript:ENSRNOT00000068171.4 gene_biotype:protein_coding transcript_biotype:protein_coding gene_symbol:Slc4a7 description:solute carrier family 4 membe	6	10	9	9	11.2	128.89	246160	379910	316350	314140	548800	282290	365060	398717	0.787878	0.389544
ENSRNOP00000096654	CD44 molecule (Indian blood grou	Cd44	ENSRNOP00000096654.1;ENSRNOP00000009073.7;ENSRNOP00000080825.1;ENSRNOP00000090715.1;ENSRNOP00000078366.1;ENSRNOP00000008760.7;ENSRNOP00000092325.1;ENSRNOP00000090045.1;ENSRNOP00000009000.3;ENSRNOP00000097897.1	ENSRNOP00000096654.1 pep primary_assembly:mRatBN7.2:3:89157058:89244620:-1 gene:ENSRNOG00000006094.9 transcript:ENSRNOT00000107007.1 gene_biotype:protein_coding transcript_biotype:protein_coding gene_symbol:Cd44 description:CD44 molecule (Indian blood grou	10	2	2	2	4.3	53.387	290730	326830	172800	263453	316500	275770	9127.8	200466	1.31421	0.587797
ENSRNOP00000008788	TBC1 domain family, member 1	Tbc1d10a	ENSRNOP00000008788.5	ENSRNOP00000008788.5 pep primary_assembly:mRatBN7.2:14:79055432:79083600:1 gene:ENSRNOG00000006394.8 transcript:ENSRNOT00000008788.8 gene_biotype:protein_coding transcript_biotype:protein_coding gene_symbol:Tbc1d10a description:TBC1 domain family, member 1	1	1	1	1	2.4	59.607	87461	75026	95576	86021	6155.2	69739	112100	62664.7	1.37272	0.49781
ENSRNOP00000008873	cereblon	Crbn	ENSRNOP00000008873.4	ENSRNOP00000008873.4 pep primary_assembly:mRatBN7.2:4:139701094:139719938:-1 gene:ENSRNOG00000006534.6 transcript:ENSRNOT00000008873.5 gene_biotype:protein_coding transcript_biotype:protein_coding gene_symbol:Crbn description:cereblon [Source:RGD Symbol;Ac	1	8	8	8	33.7	50.877	483550	576380	463120	507683	632350	635210	462410	576657	0.880391	0.360932
[truncated: 4,283 more rows]
