# Supplementary material for: PCSK9 inhibitor effectively alleviated cognitive dysfunction in a type 2 diabetes mellitus rat model
Source: PeerJ. 2024 Aug 14;12:e17676. doi: 10.7717/peerj.17676 (PMC11330219; doi:10.7717/peerj.17676)
Supplement: Supplemental Information 2 — “Protein Name” and “Peptide Sequence” are used to describe proteins. Columns C to K respectively represent the relative expression of protein detected in three replicates of proteomics in DACD rats and normal controls. Columns D to L respectively represent the relative expression of peptides detected in three replicates of proteomics in DACD rats and normal controls. [file peerj-12-17676-s002.xlsx]

## Sheet: supplementary material 2
Protein internal standard corrected peak area
Protein Name	MODEL-1	MODEL-2	MODEL-3	TREAT-1	TREAT-2	TREAT-3
Ttr	0.0312168	0.0322913	0.03497	0.0497207	0.0354904	0.0476557
Peptide internal standard corrected peak area
Peptide Sequence	Protein Name	MODEL-1	MODEL-2	MODEL-3	TREAT-1	TREAT-2	TREAT-3
SYCAEIAHNVSSK	Ttr	0.033814	0.0310067	0.0387705	0.0531067	0.0486118	0.0477775
SYFSSEGIEYNIIR	Ttr	0.0286195	0.0310067	0.0311694	0.0463348	0.022369	0.0475339
