# Supplementary material for: PCSK9 inhibitor effectively alleviated cognitive dysfunction in a type 2 diabetes mellitus rat model
Source: PeerJ. 2024 Aug 14;12:e17676. doi: 10.7717/peerj.17676 (PMC11330219; doi:10.7717/peerj.17676)
Supplement: Supplemental Information 3 [file peerj-12-17676-s003.xlsx]

## Sheet: qRT-PCR 
							AVERAGE					△CT				△△CT				2-△△CT
	Number	GAPDH	IL-6	IL-1β	TNF-α		GAPDH	IL-6	IL-1β	TNF-α		IL-6	IL-1β	TNF-α		IL-6	IL-1β	TNF-α		IL-6	IL-1β	TNF-α
Control	C1-1	17.04	25.16	25.27	26.3
	C1-2	16.85	25.13	25.12	26.09		17.0033	25.0367	25.2467	26.4333		8.03333	8.24333	9.43		0	0	0		1	1	1
	C1-3	17.12	24.82	25.35	26.91
	C2-1	17.65	26.97	27.06	28.62
	C2-2	17.41	26.8	27.67	28.75		17.5633	26.8733	27.2867	28.5233		9.31	9.72333	10.96		1.27667	1.48	1.53		0.412748	0.358489	0.346277
	C2-3	17.63	26.85	27.13	28.2
	C3-1	17.42	27.19	27.85	28.84
	C3-2	17.52	27.39	27.69	28.08		17.4933	27.35	27.7267	28.4067		9.85667	10.2333	10.9133		1.82333	1.99	1.48333		0.282567	0.251739	0.357661
	C3-3	17.54	27.47	27.64	28.3
	C4-1	16.28	26.21	26.04	27.13
	C4-2	16.32	26.03	25.78	27.19		16.3167	26.0833	25.8867	27.1133		9.76667	9.57	10.7967		1.73333	1.32667	1.36667		0.300756	0.398688	0.387786
	C4-3	16.35	26.01	25.84	27.02
	C5-1	17.32	26.65	26.86	26.65
	C5-2	17.48	26.12	26.56	26.58		17.3533	26.3167	26.5667	26.7367		8.96333	9.21333	9.38333		0.93	1.18	1.35		0.524858	0.441351	0.392292
	C5-3	17.26	26.18	26.28	26.98
Model	D1-1	16.65	24.25	24.26	25.04
	D1-2	16.38	24.04	24.12	25.76		16.3833	24.09	24.1767	25.5633		7.70667	7.79333	9.18		-0.326667	-0.45	-0.25		1.25411	1.36604	1.18921
	D1-3	16.12	23.98	24.15	25.89
	D2-1	17	24.81	24.68	25.58
	D2-2	16.83	24.04	24.03	25.42		16.9233	24.3733	24.5333	25.5533		7.45	7.61	8.63		-0.583333	-0.633333	-0.8		1.49831	1.55114	1.7411
	D2-3	16.94	24.27	24.89	25.66
	D3-1	16.93	24.65	25.14	25.63
	D3-2	16.95	24.13	25.12	27.11		16.95	24.6633	25.05	26.2467		7.71333	8.1	9.29667		-0.32	-0.143333	-0.133333		1.24833	1.10445	1.09682
	D3-3	16.97	25.21	24.89	26
	D4-1	16.21	24.05	24.12	25.04
	D4-2	16.19	24.14	24.17	25.12		16.17	24.1033	24.11	25.38		7.93333	7.94	9.21		-0.1	-0.303333	-0.22		1.07177	1.23399	1.16473
	D4-3	16.11	24.12	24.04	25.98
	D5-1	16.32	24.12	24.56	24.85
	D5-2	16.46	24.08	24.87	25.18		16.42	24.0233	24.53	25.03		7.60333	8.11	8.61		-0.43	-0.133333	-0.82		1.34723	1.09682	1.76541
	D5-3	16.48	23.87	24.16	25.06
Treat	P1-1	16.64	25.26	25.46	26.44
	P1-2	16.44	25.18	25.88	26.48		16.4967	25.1967	25.56	26.52		8.7	9.06333	10.0233		0.666667	0.82	0.593333		0.629961	0.566442	0.66281
	P1-3	16.41	25.15	25.34	26.64
	P2-1	17.65	26.07	26.06	28.02
	P2-2	17.38	26.12	26.09	28.03		17.43	26.0933	26.0767	27.97		8.66333	8.64667	10.54		0.63	0.403333	1.11		0.646176	0.756109	0.463294
	P2-3	17.26	26.09	26.08	27.86
	P3-1	17	25.41	26.04	27.35
	P3-2	16.83	25.43	26.17	27.38		16.9233	25.4167	26.11	27.2233		8.49333	9.18667	10.3		0.46	0.943333	0.87		0.726986	0.52003	0.547147
	P3-3	16.94	25.41	26.12	26.94
	P4-1	16.93	25.52	26.13	27.28
	P4-2	16.95	25.67	26.01	27.19		16.95	25.56	26.3067	27.12		8.63667	9.38333	10.1967		0.603333	1.14	0.766667		0.658231	0.45376	0.587774
	P4-3	16.97	25.49	26.78	26.89
	P5-1	16.21	25.18	26.12	27.02
	P5-2	16.19	25.29	26.07	26.89		16.17	25.2433	26.37	26.9933		8.32	9.44667	10.07		0.286667	1.20333	0.64		0.819794	0.434271	0.641713
	P5-3	16.11	25.26	26.92	27.07

## Sheet: qRT-PCR primes
TNF-α	fwd 5′-GAGAGATTGGCTGCTGGAAC-3′，
	rev 5′-TGGAGACCATGATGACCGTA-3′
IL-6	fwd 5′-CACTCCGGAGAGGAGACAAG-3′
	rev 5′-ACAGTGCATCATCGCTGTTC-3′
IL-1β	fwd 5′-AGGTCGTCATCATCCCACGAG-3′
	rev 5′-GCTGTGGCAGCTACCTATGTCTTG-3′
β-actin	FWD 5′-CAGCCGCGAGATTACCTACAA-3′
	rev 5′-CTTTGCATGCCTCCGCTCCGT-3′

## Sheet: Immunohistochemical 
		Area	IOD	IOD/Area
Control	C1	3215426	130394	0.0405528
	C2	3394475	143332	0.0422252
	C3	3786272	186544	0.0492685
	C4	3701371	161856	0.0437288
	C5	3276088	134615	0.0410902
Model	D1	4007835	256987	0.0641212
	D2	3823701	221322	0.0578816
	D3	3873066	230717	0.0595696
	D4	3812675	219589	0.0575944
	D5	3807604	222251	0.0583702
Treat	P1	3556882	163861	0.0460688
	P2	3241691	147651	0.0455477
	P3	3132176	139004	0.0443794
	P4	4571849	241657	0.0528576
	P5	3891773	185545	0.0476763

## Sheet: western blot
	PCSK9	LDLR	β-actin	PCSK9/β-actin	LDLR/β-actin
Control	59.686	125.501	77.57	0.769447	1.61791
	69.207	131.033	86.538	0.79973	1.51417
	67.144	125.992	83.378	0.805296	1.51109
Model	89.278	79.299	81.864	1.09056	0.968668
	91.031	67.017	85.541	1.06418	0.783449
	83.901	66.77	86.273	0.972506	0.773939
Treat	70.386	133.873	84.787	0.830151	1.57893
	71.613	127.853	79.235	0.903805	1.61359
	60.004	116.848	79.4	0.755718	1.47164

## Sheet: weight and glycolipid metabolis
	Control								Model								Treat
TC	1.724	1.359	1.272	1.62	1.297	1.346	1.534	1.246	1.757	1.783	1.803	1.865	1.926	2.14	1.942	1.963	1.612	1.667	1.464	1.83	1.613	1.38	1.416	1.664
TG	0.84	0.777	1.222	1.337	0.603	0.567	0.686	0.645	1.132	0.891	1.077	1.231	1.872	1.268	1.345	1.546	0.345	1.056	0.594	0.574	0.783	1.768	0.612	1.865
HDL	0.542	0.495	0.525	0.414	0.397	0.548	0.683	0.528	0.613	0.687	0.589	0.545	0.442	0.469	0.582	0.573	0.647	0.463	0.656	0.542	0.583	0.611	0.518	0.532
LDL	0.384	0.262	0.286	0.315	0.293	0.312	0.286	0.364	0.408	0.316	0.6	0.604	0.523	0.396	0.478	0.586	0.328	0.394	0.378	0.397	0.487	0.339	0.232	0.342
FBG	6.56	7.59	7.7	5.32	5.19	6.48	7.42	5.46	29.85	33.39	33.67	36.82	28.67	32.56	26.43	29.68	25.93	33.85	37.13	31.35	33.08	39.82	29.41	28.32
FINS	10.27	9.95	9.79	10.24	10.68	9.77	9.74	10.34	7.32	8.07	8.41	7.23	8.29	8.41	8.59	7.8	7.16	7.93	7.41	7.29	8.05	8.35	8.03	8.11
Weight	369	386	424	329	476	430	348	496	346	416	436	515	342	462	451	374	621	590	623	586	598	628	618	624
PCSK9	11.7476	13.8509	12.3132	9.80722	11.7862	10.5527	12.9804	11.6527	13.7878	15.184	11.1748	12.4958	14.2299	16.1578	17.7564	16.6564	12.854	11.8916	10.282	11.0132	11.7722	12.5976	11.1116	11.86
